# Supplementary material for: I2-Mediated transition-metal-free aromatic C–H amination for the synthesis of benzimidazol-2-ones and related heterocycles
Source: Royal Society of Chemistry journal article supplement (doi:10.1039/c8nj03166e), 2018-01-01

## **I<sub>2</sub>-Mediated Transition-Metal-Free Aromatic C–H Amination for the Synthesis of Benzimidazol-2-ones and Related Heterocycles**

Yinggao Meng,<sup>a</sup> Bingnan Wang,<sup>a</sup> Linning Ren,<sup>a</sup> Qiongli Zhao,<sup>b</sup> Wenquan Yu,<sup>a,\*</sup> and Junbiao Chang<sup>a,b,\*</sup>

<sup>a</sup>*College of Chemistry and Molecular Engineering, Zhengzhou University, Zhengzhou, Henan Province 450001, China*

<sup>b</sup>*Collaborative Innovation Center of New Drug Research and Safety Evaluation, Henan Province, and School of Pharmaceutical Sciences, Zhengzhou University, Zhengzhou, Henan Province 450001, China*

1. <sup>1</sup>H NMR and <sup>13</sup>C NMR Spectra of Products **1**

S2

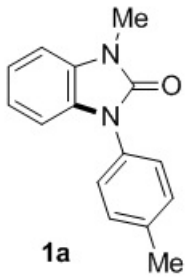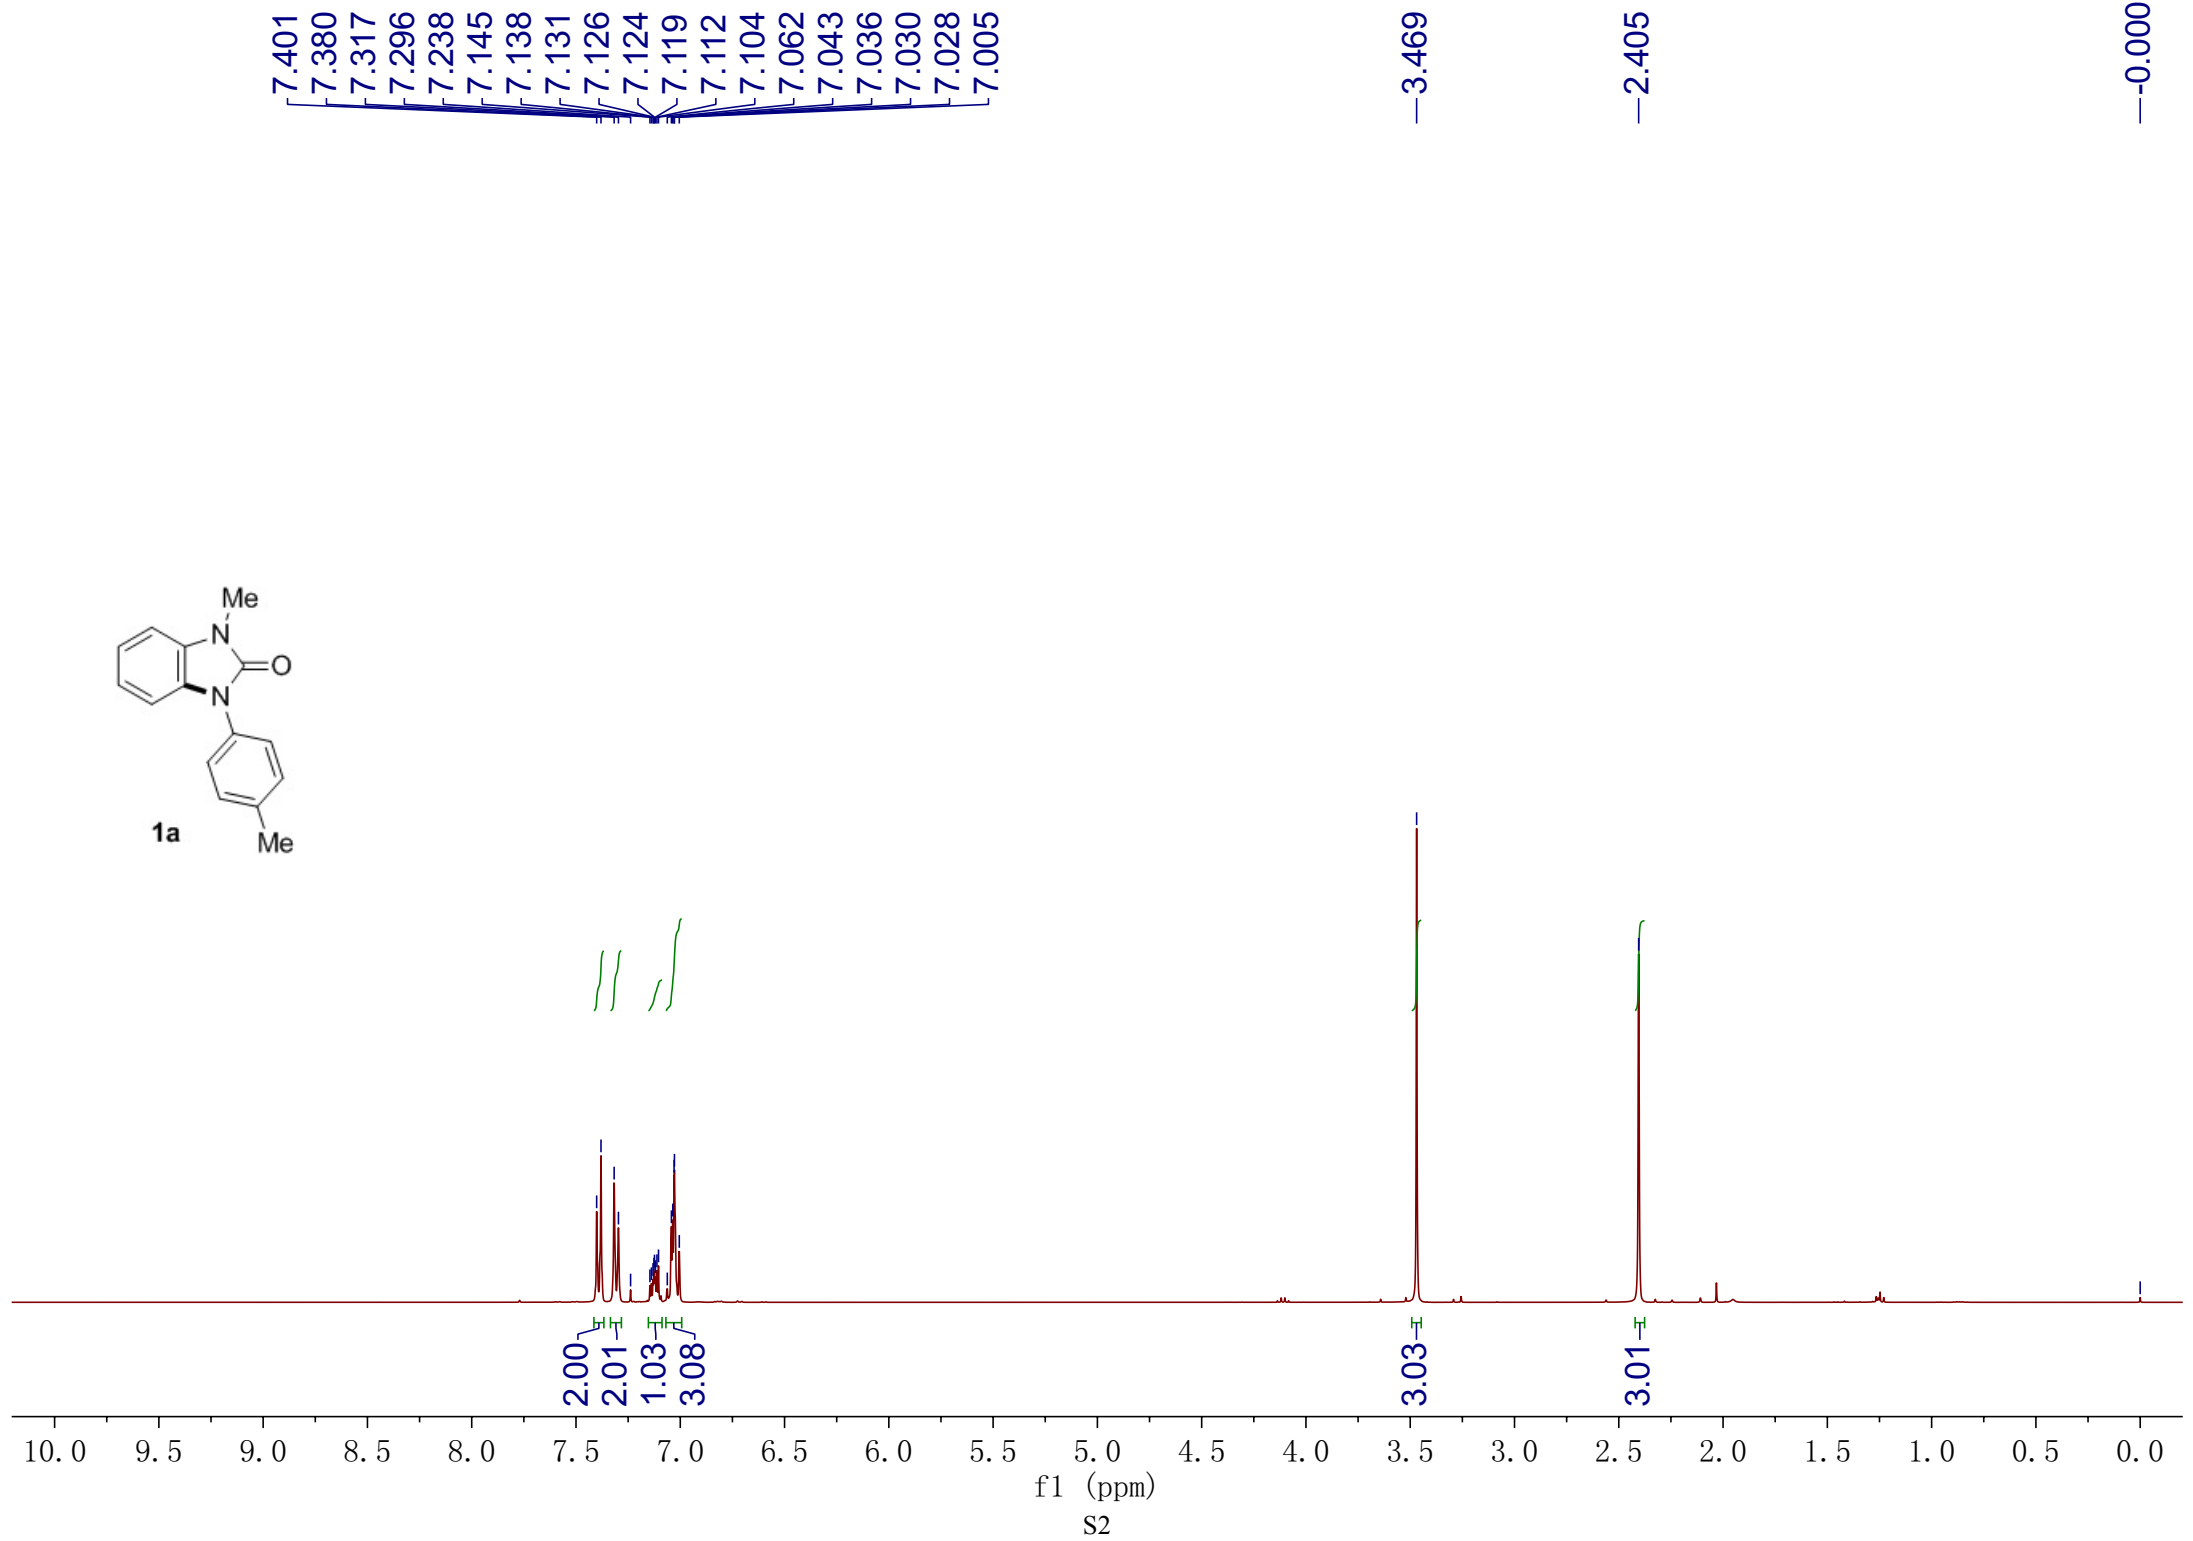

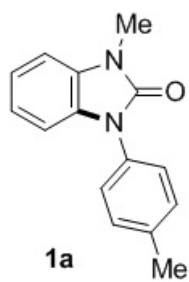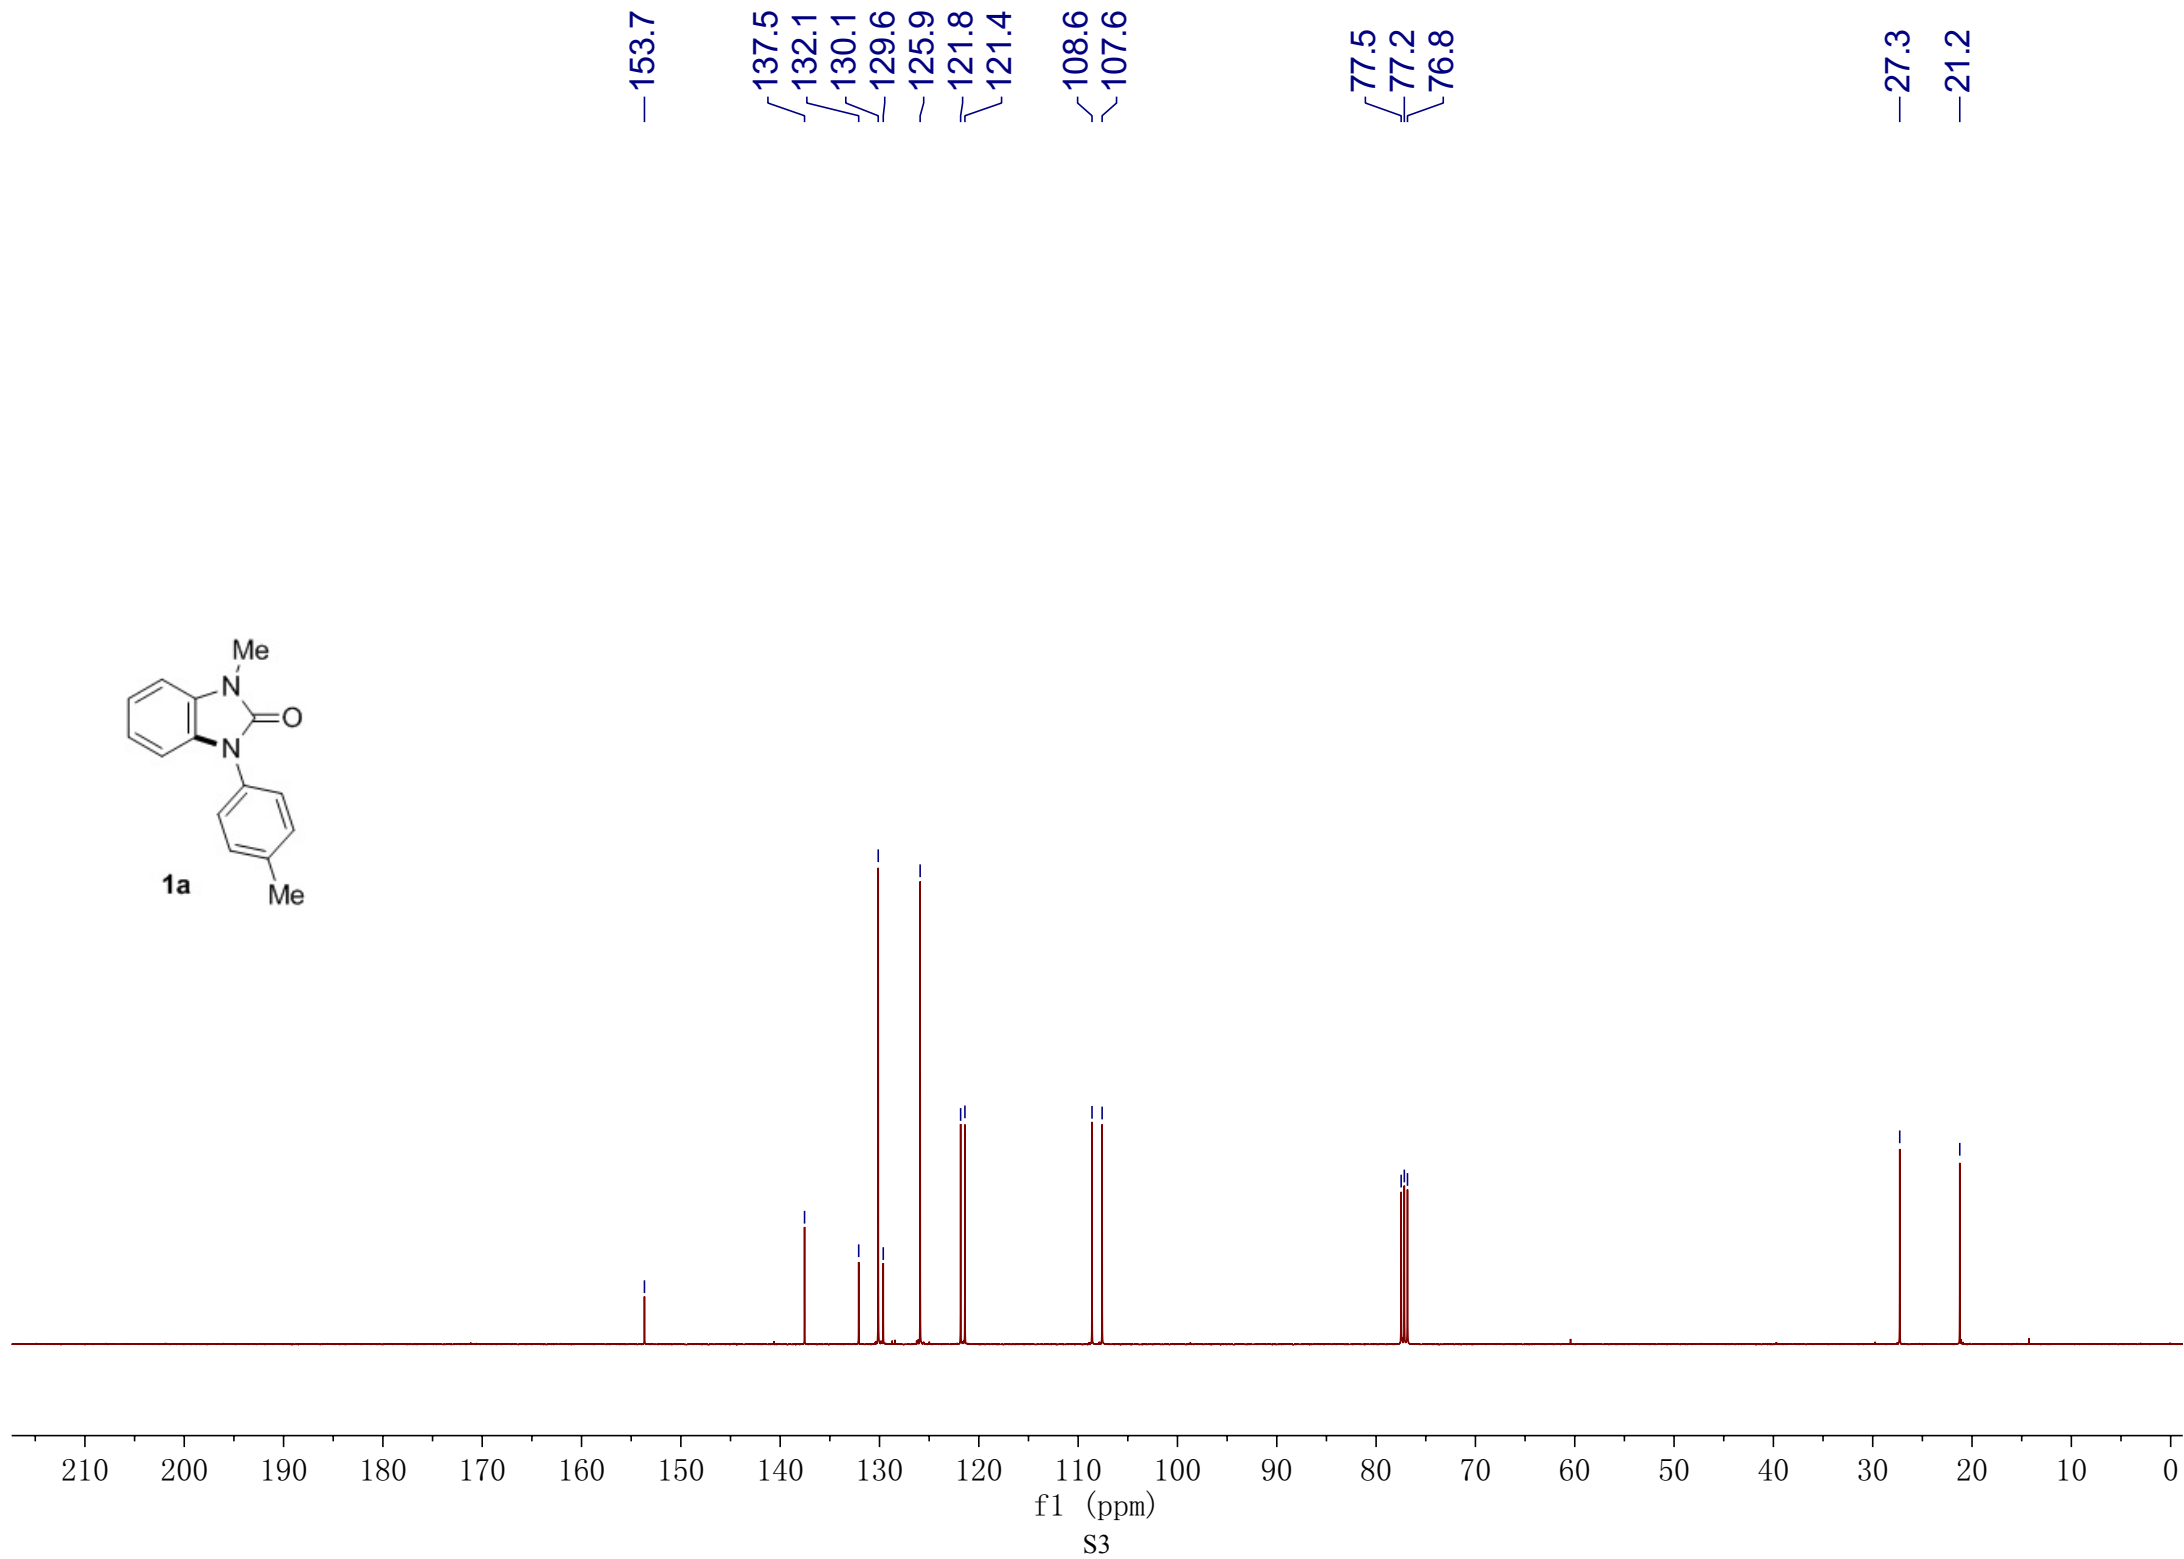

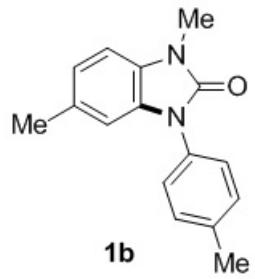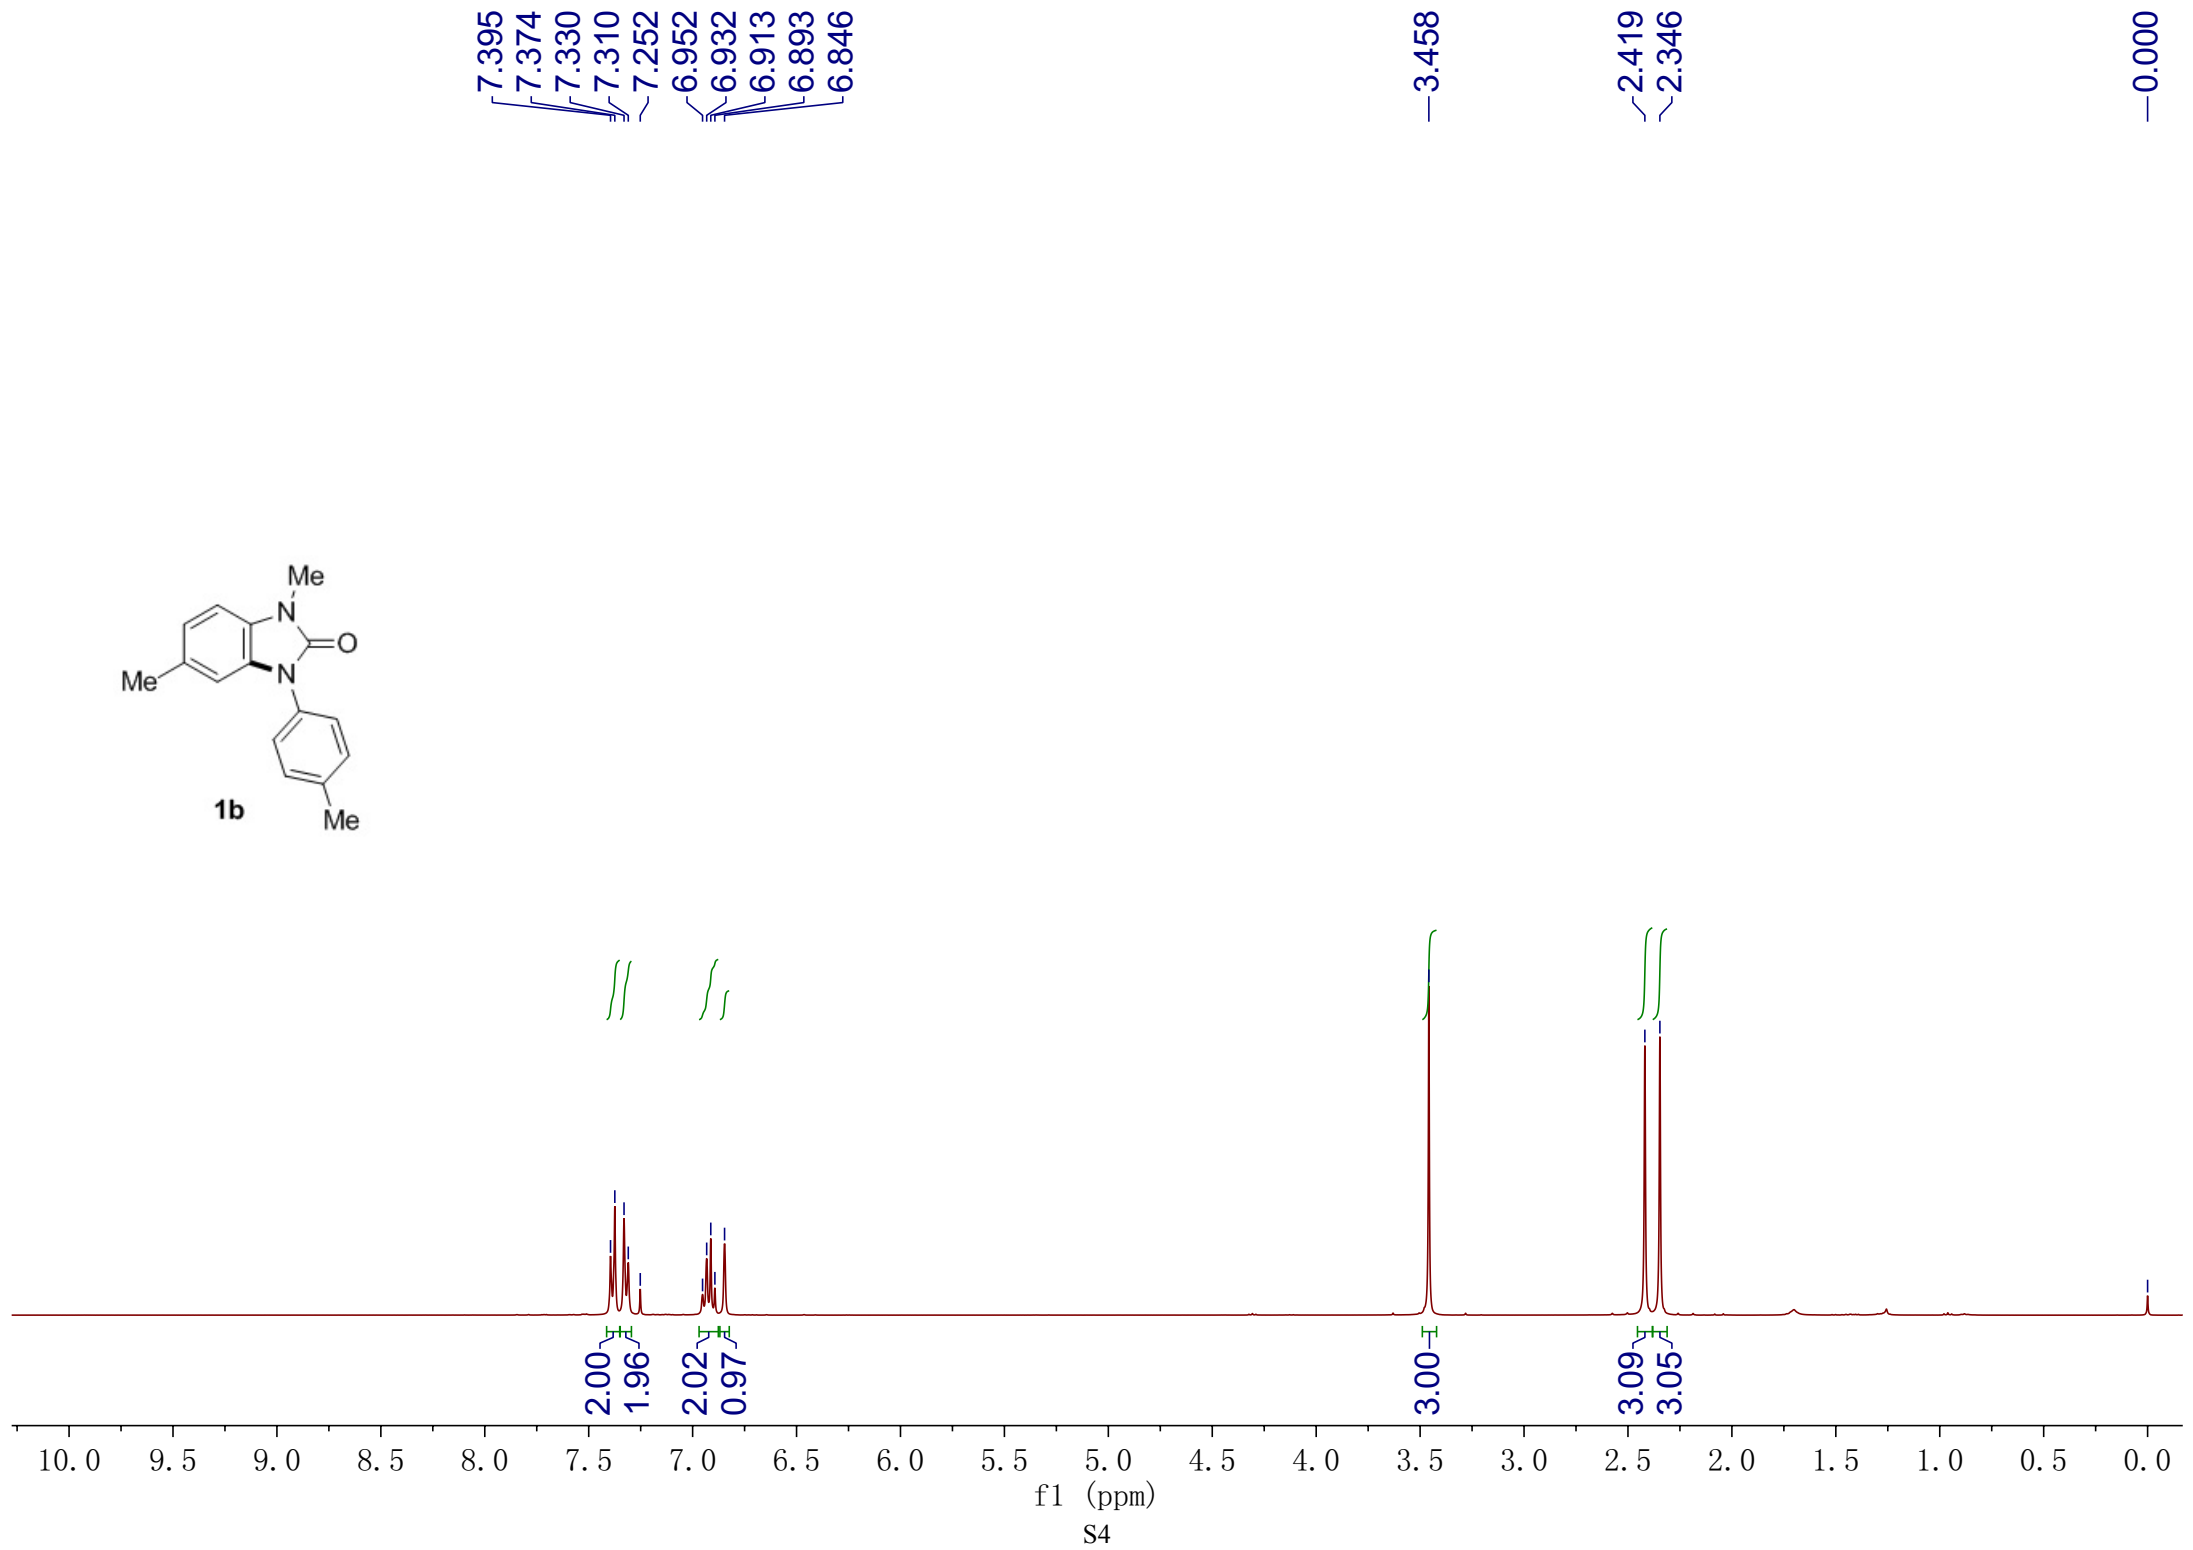



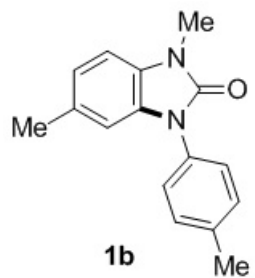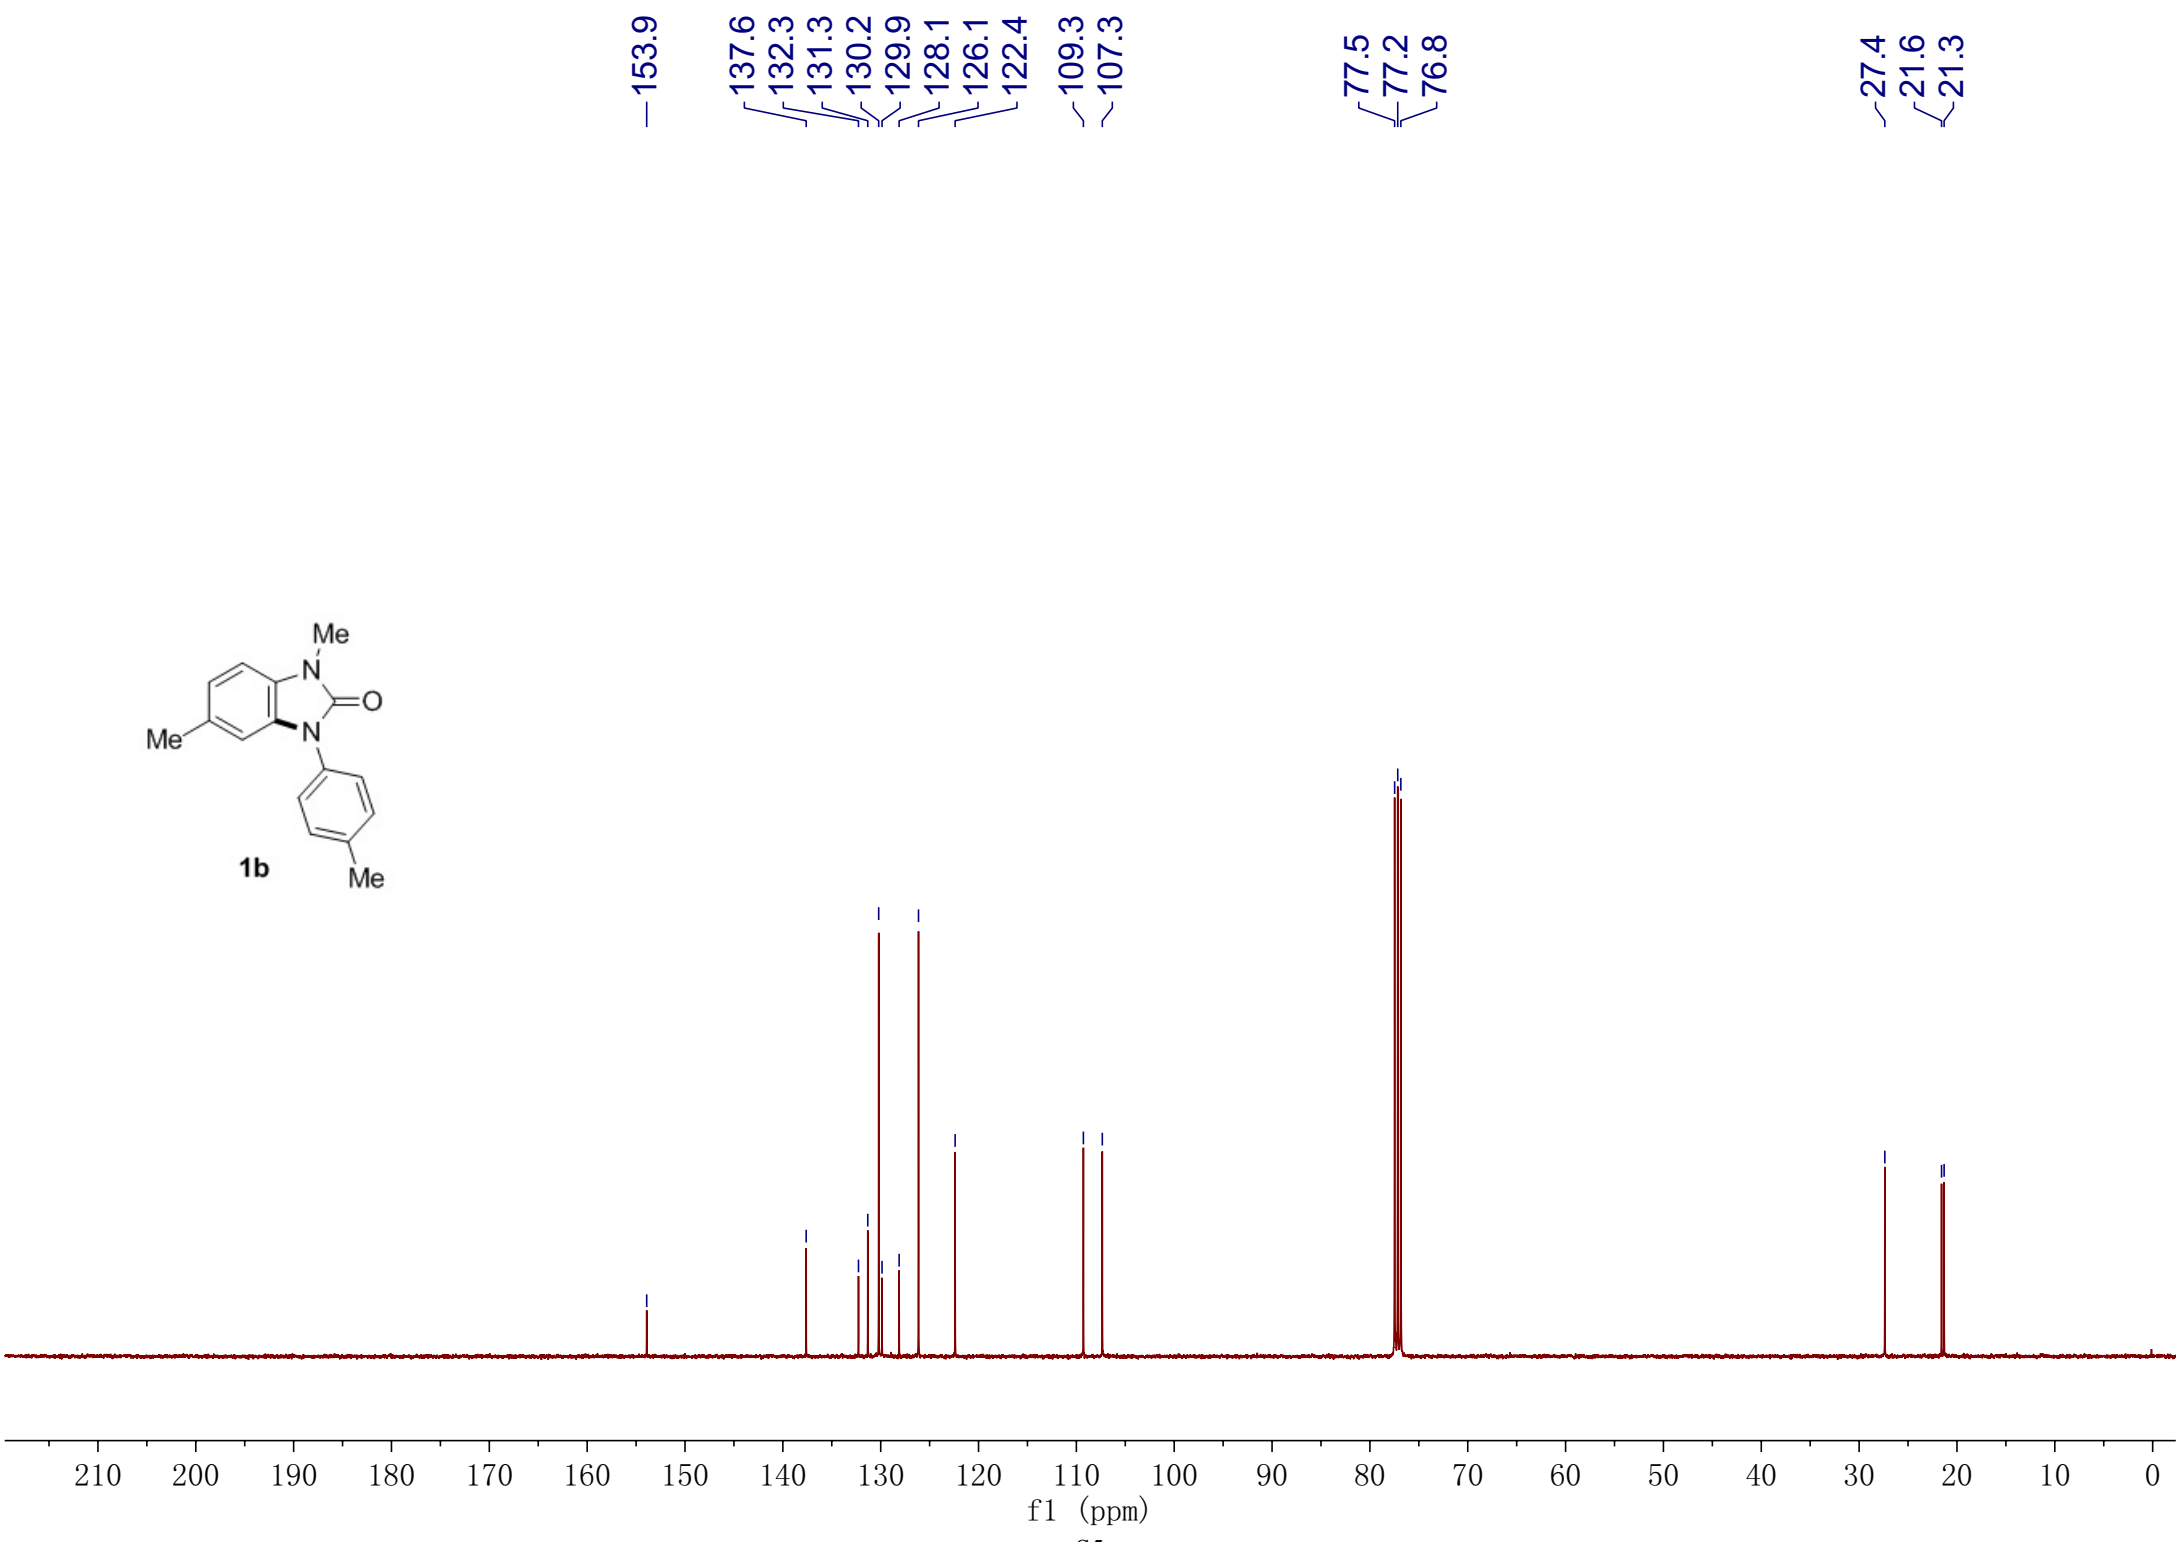

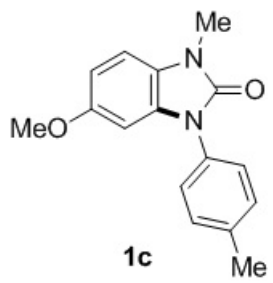

7.393  
7.372  
7.326  
7.305  
7.255  
6.915  
6.894  
6.709  
6.703  
6.688  
6.682  
6.642  
6.636

-3.755  
-3.446

-2.415

-0.000

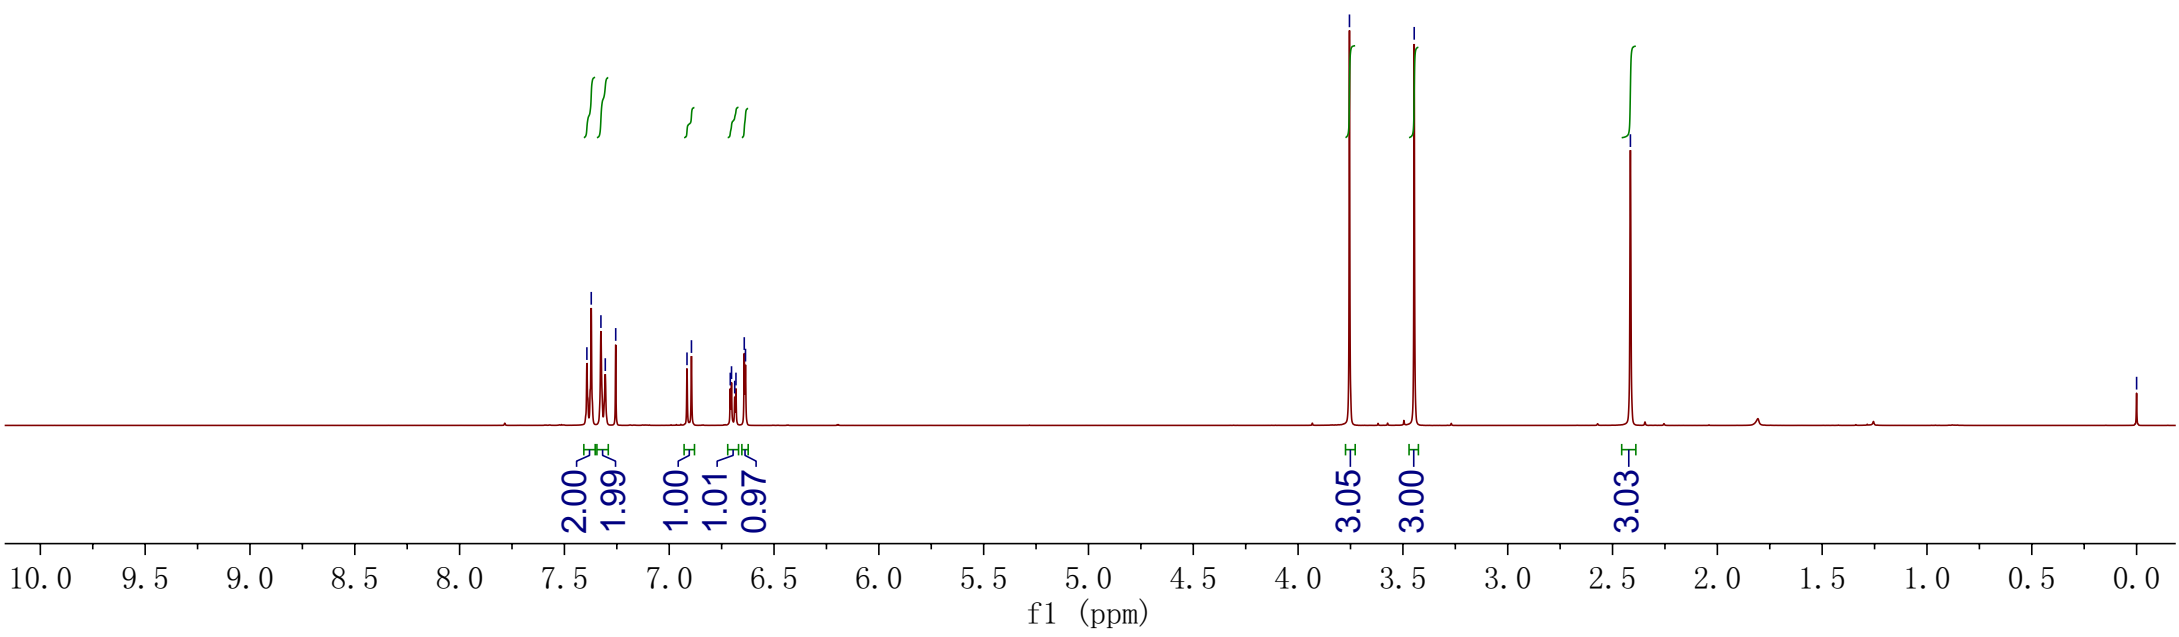

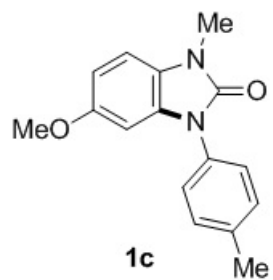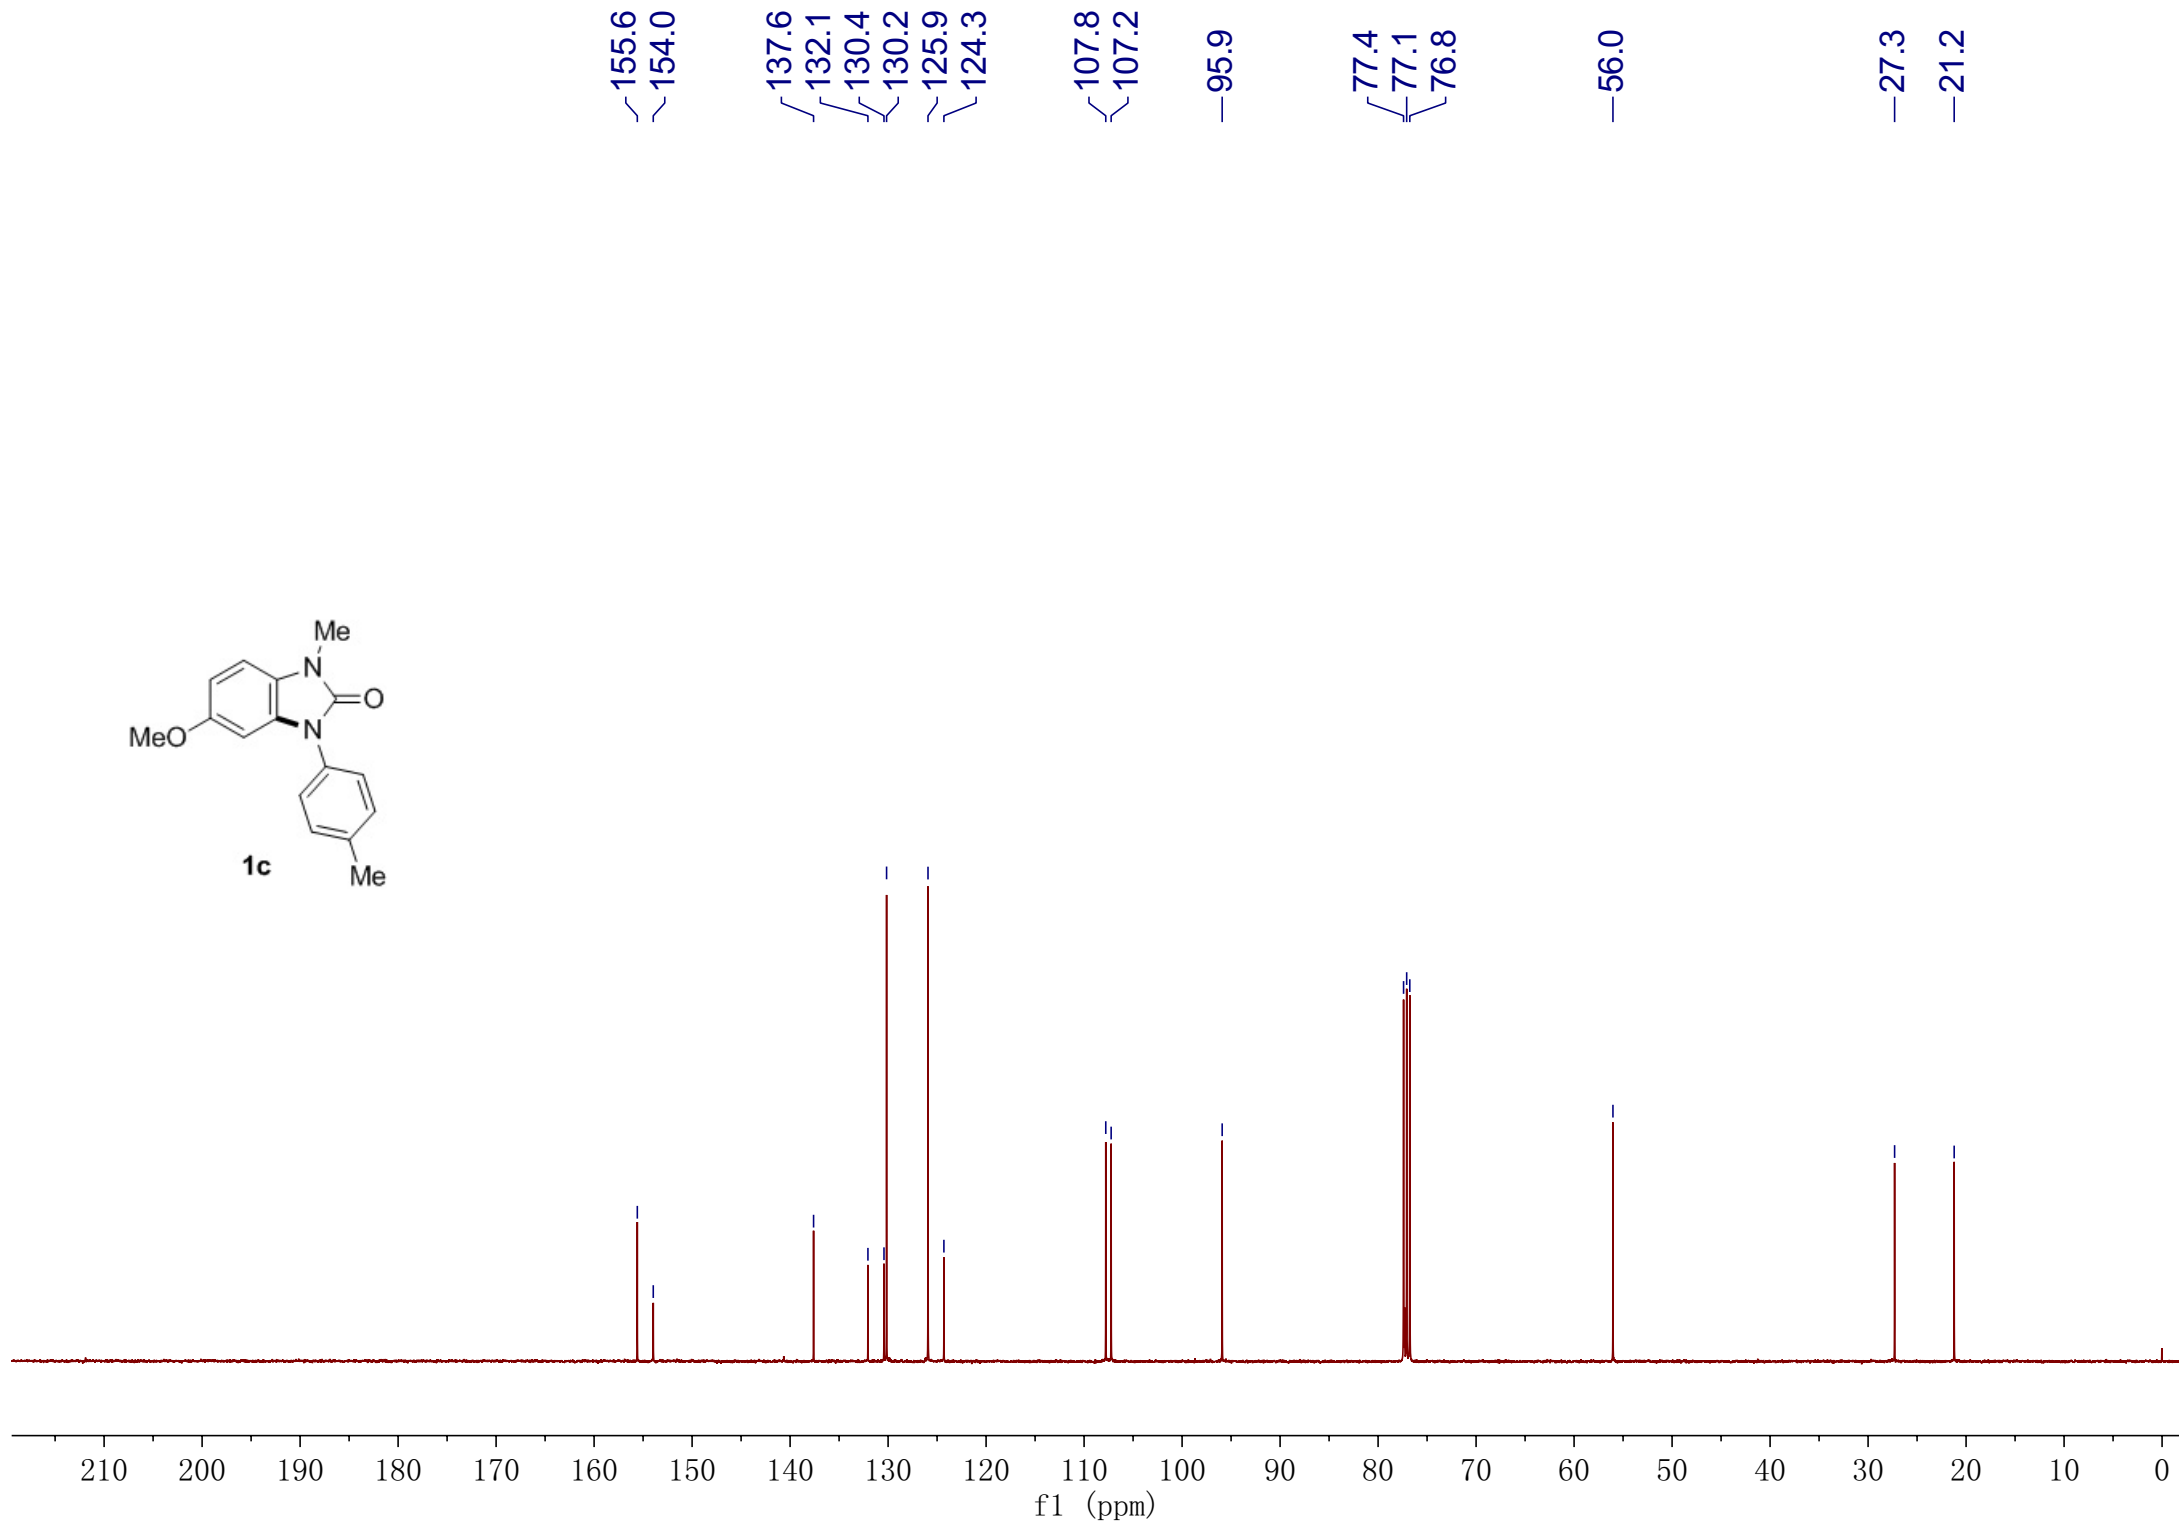

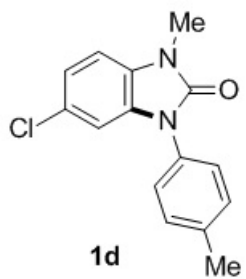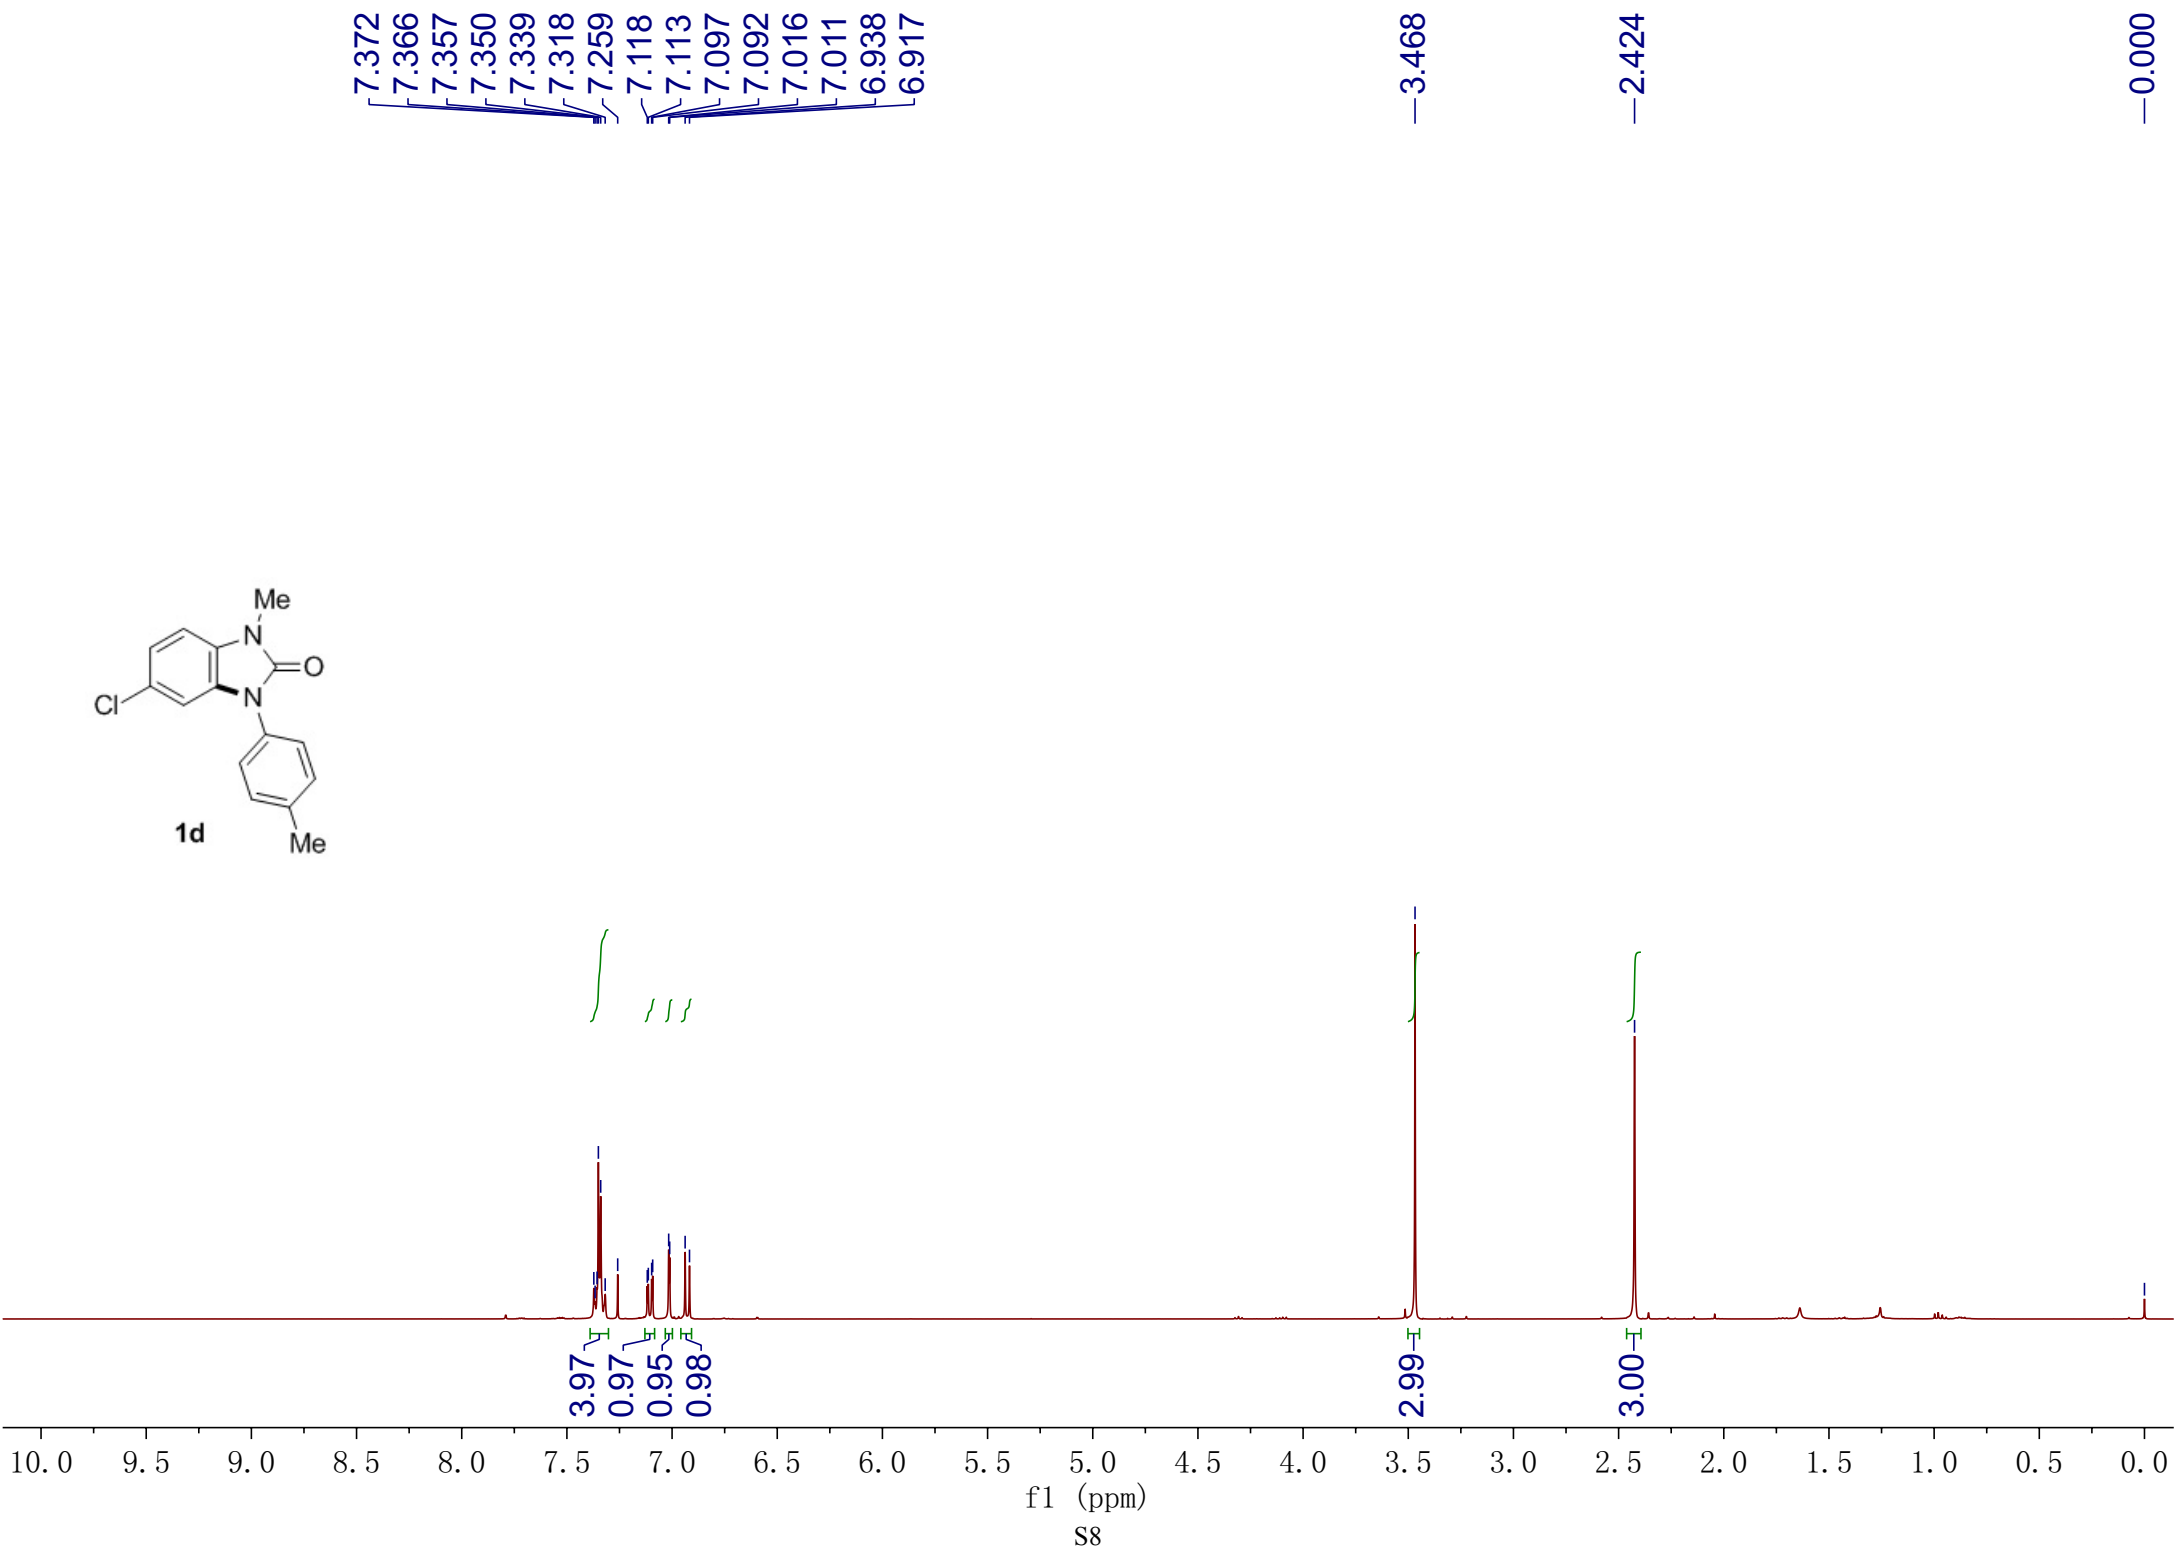

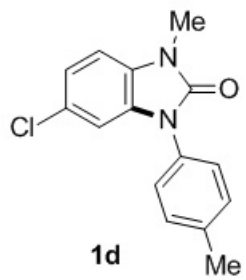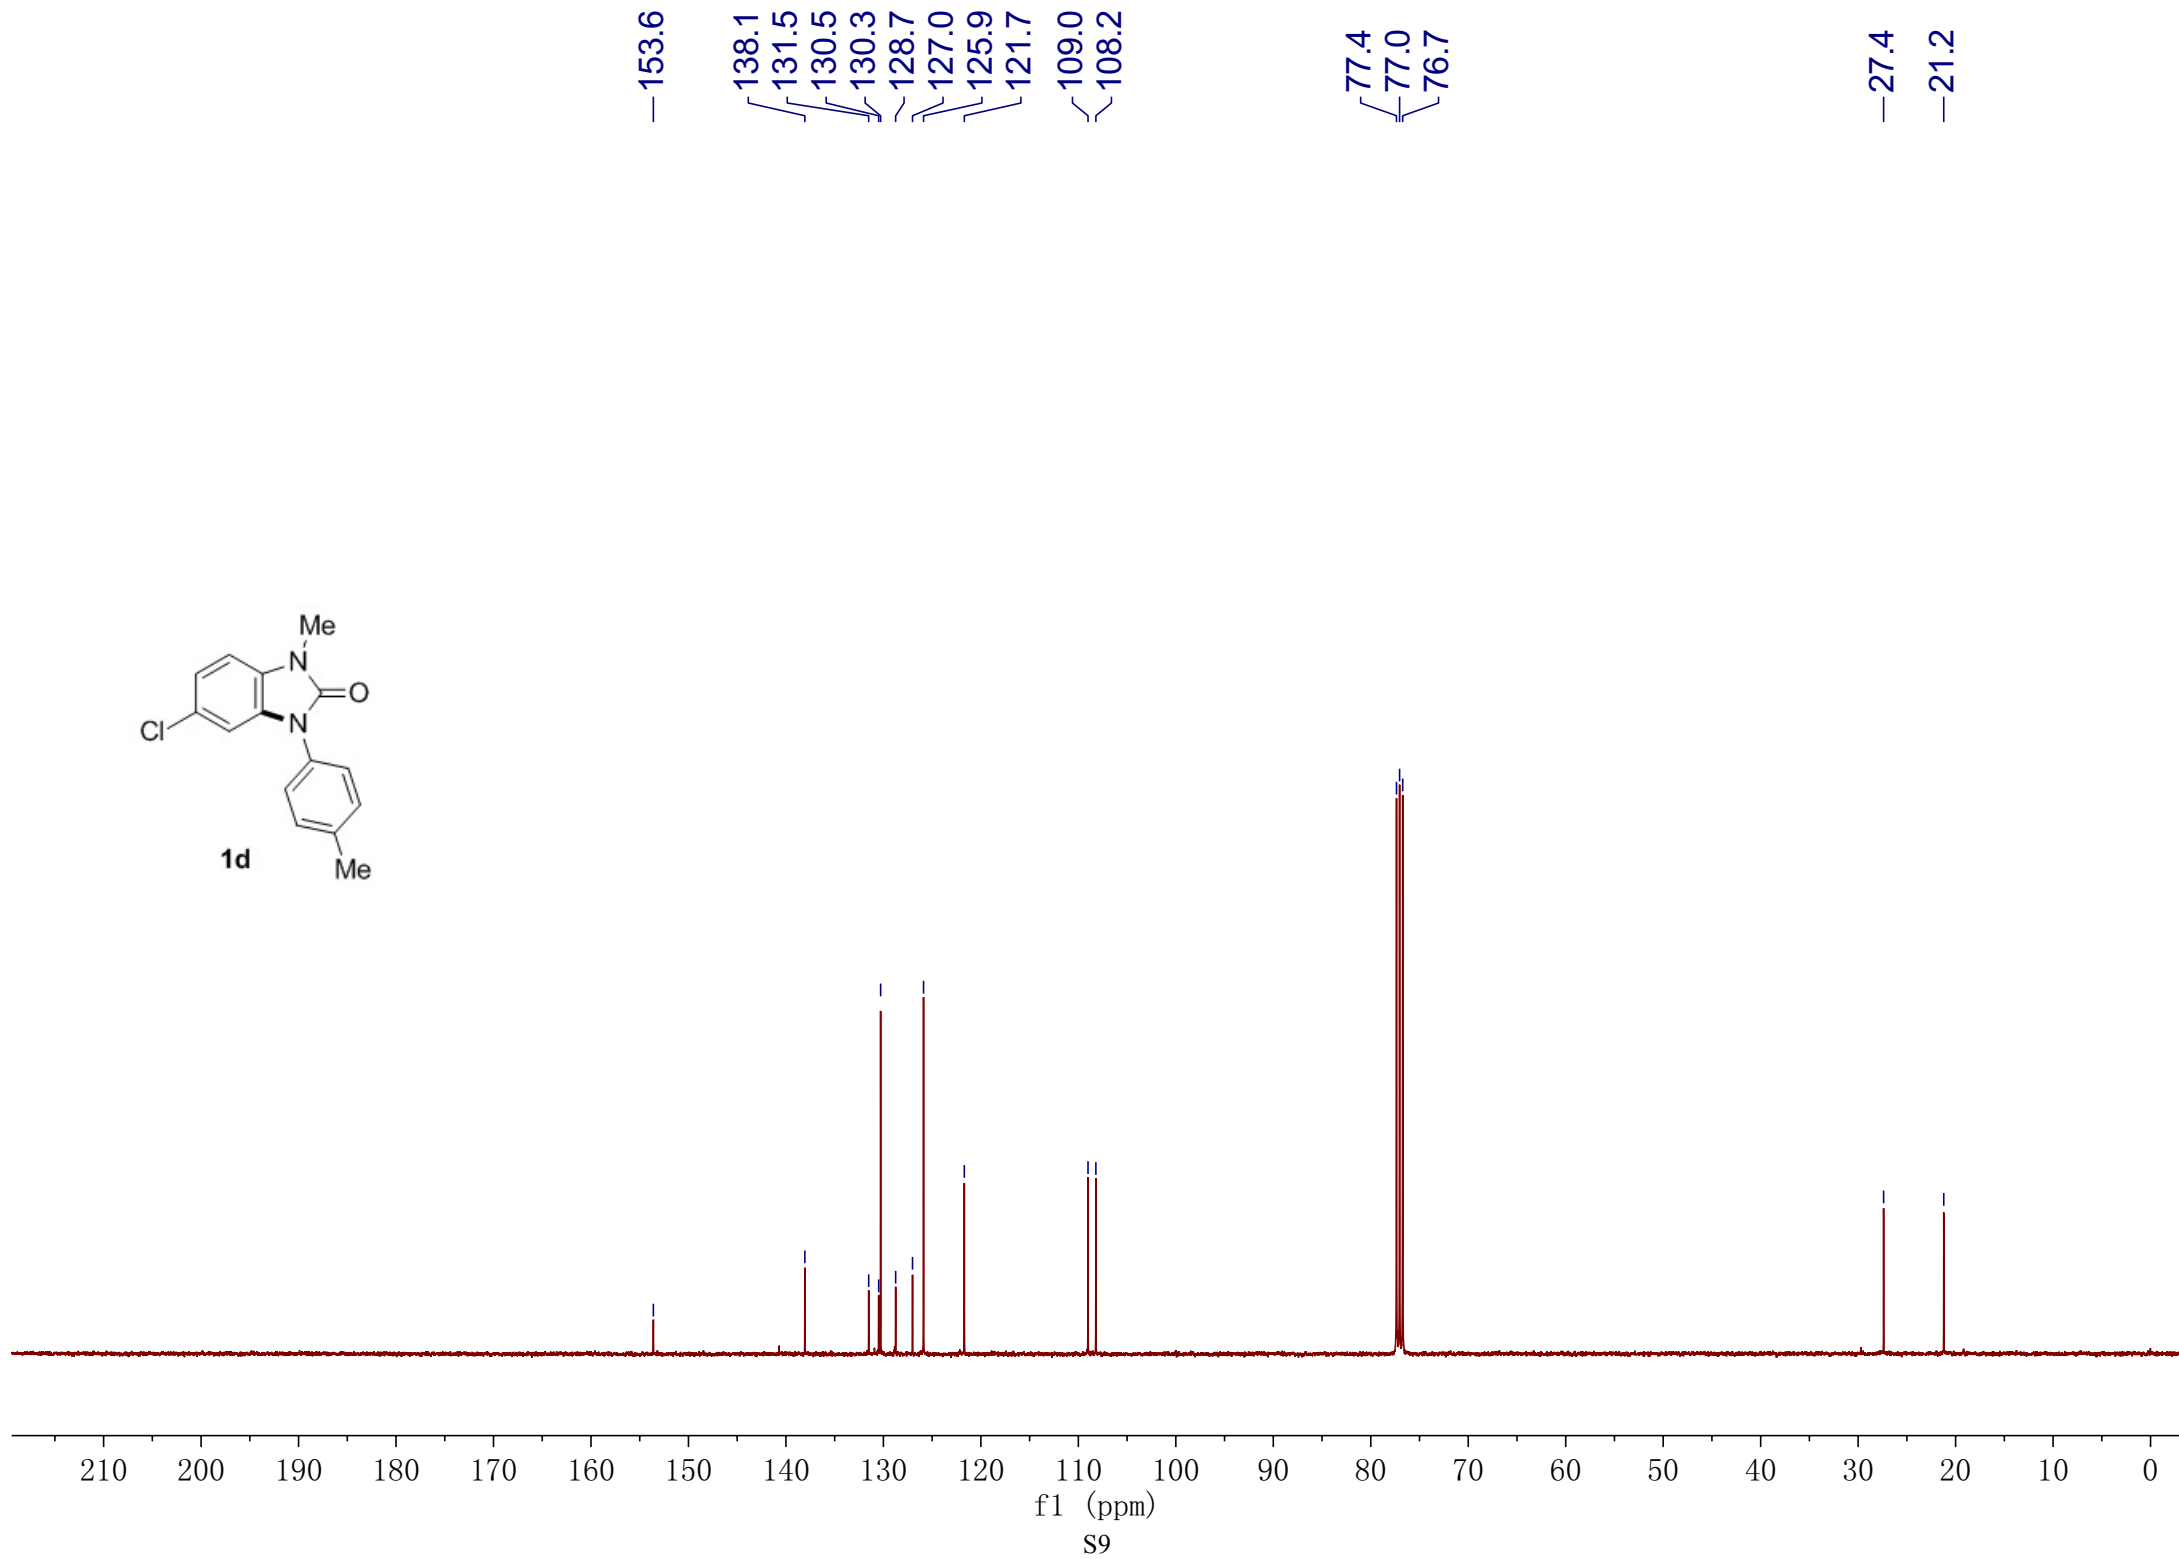

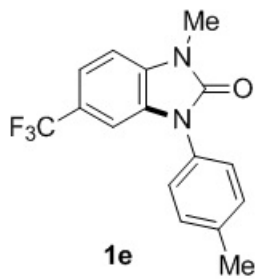

7.437  
7.416  
7.391  
7.384  
7.369  
7.366  
7.350  
7.343  
7.258  
7.242  
7.105  
7.085

3.521

2.438

0.000

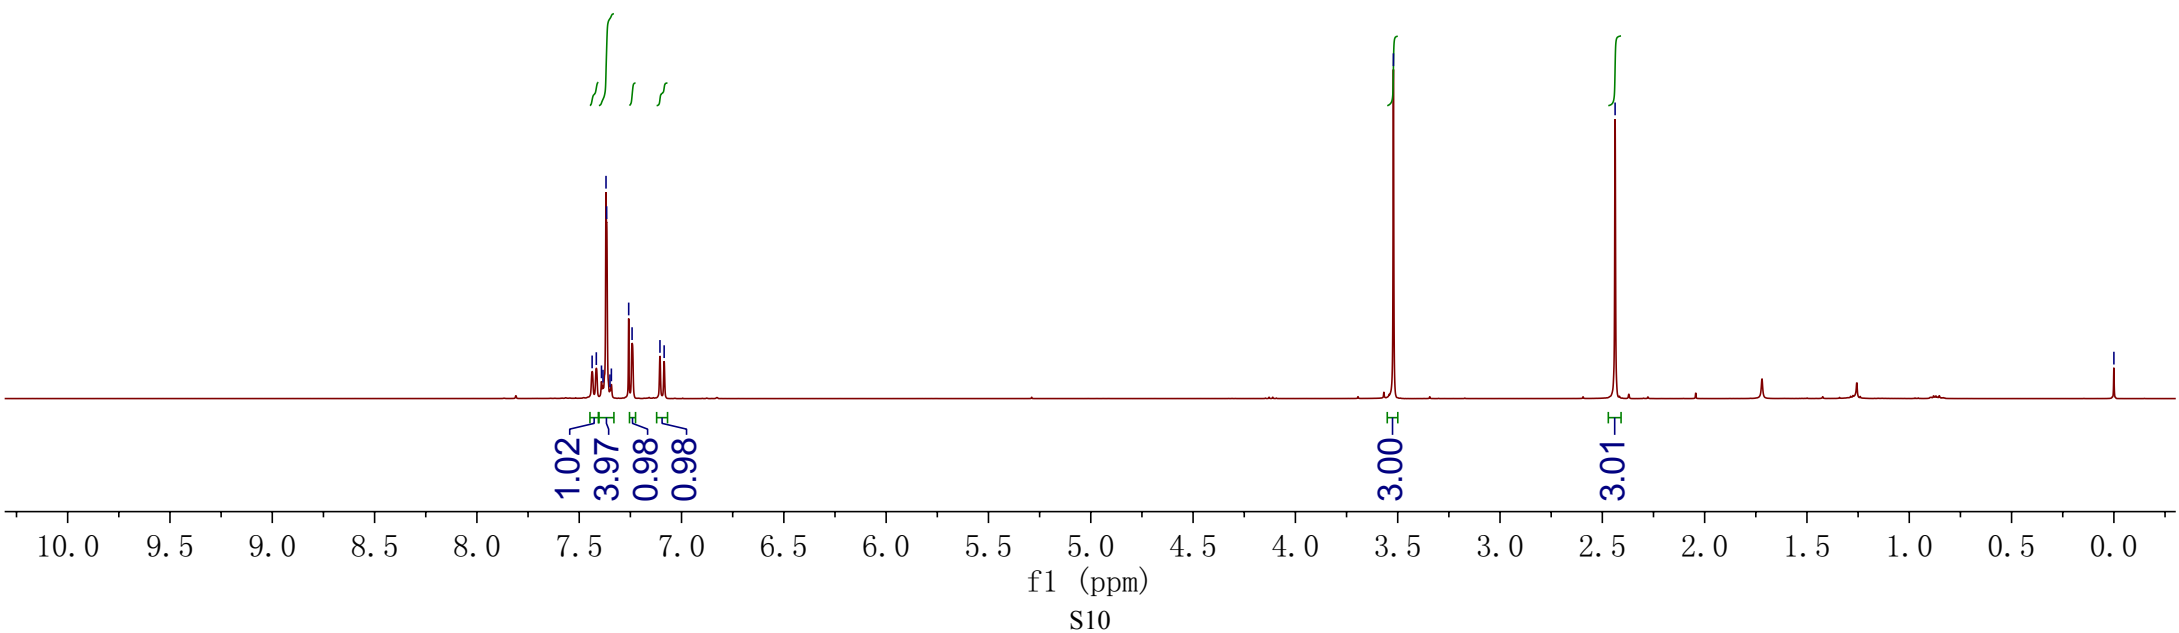

153.8  
138.3  
132.6  
131.3  
130.4  
129.7  
125.9  
125.8  
124.0  
123.7  
123.1  
119.3  
119.3  
119.2  
107.3  
105.7  
105.6  
105.6  
105.5

77.4  
77.0  
76.7

27.5  
21.2

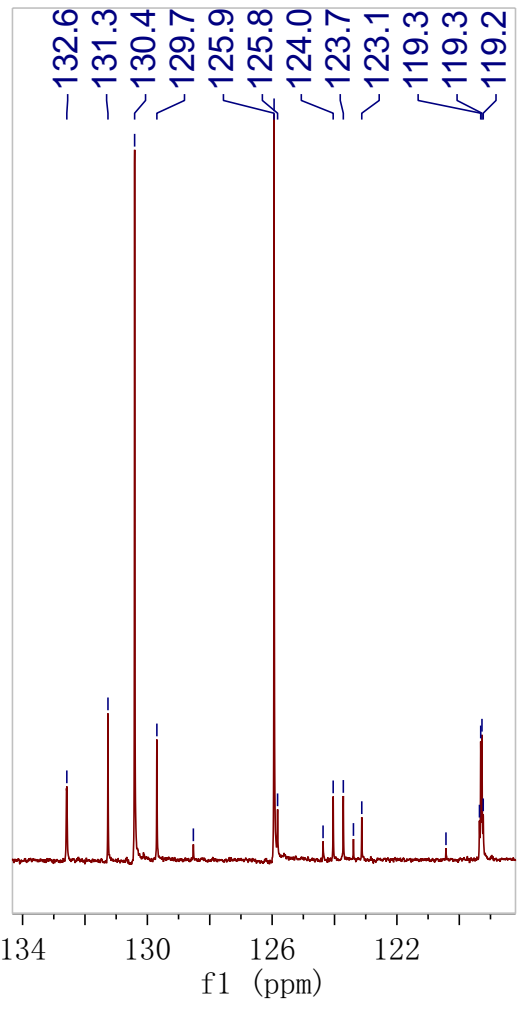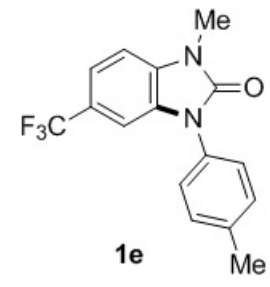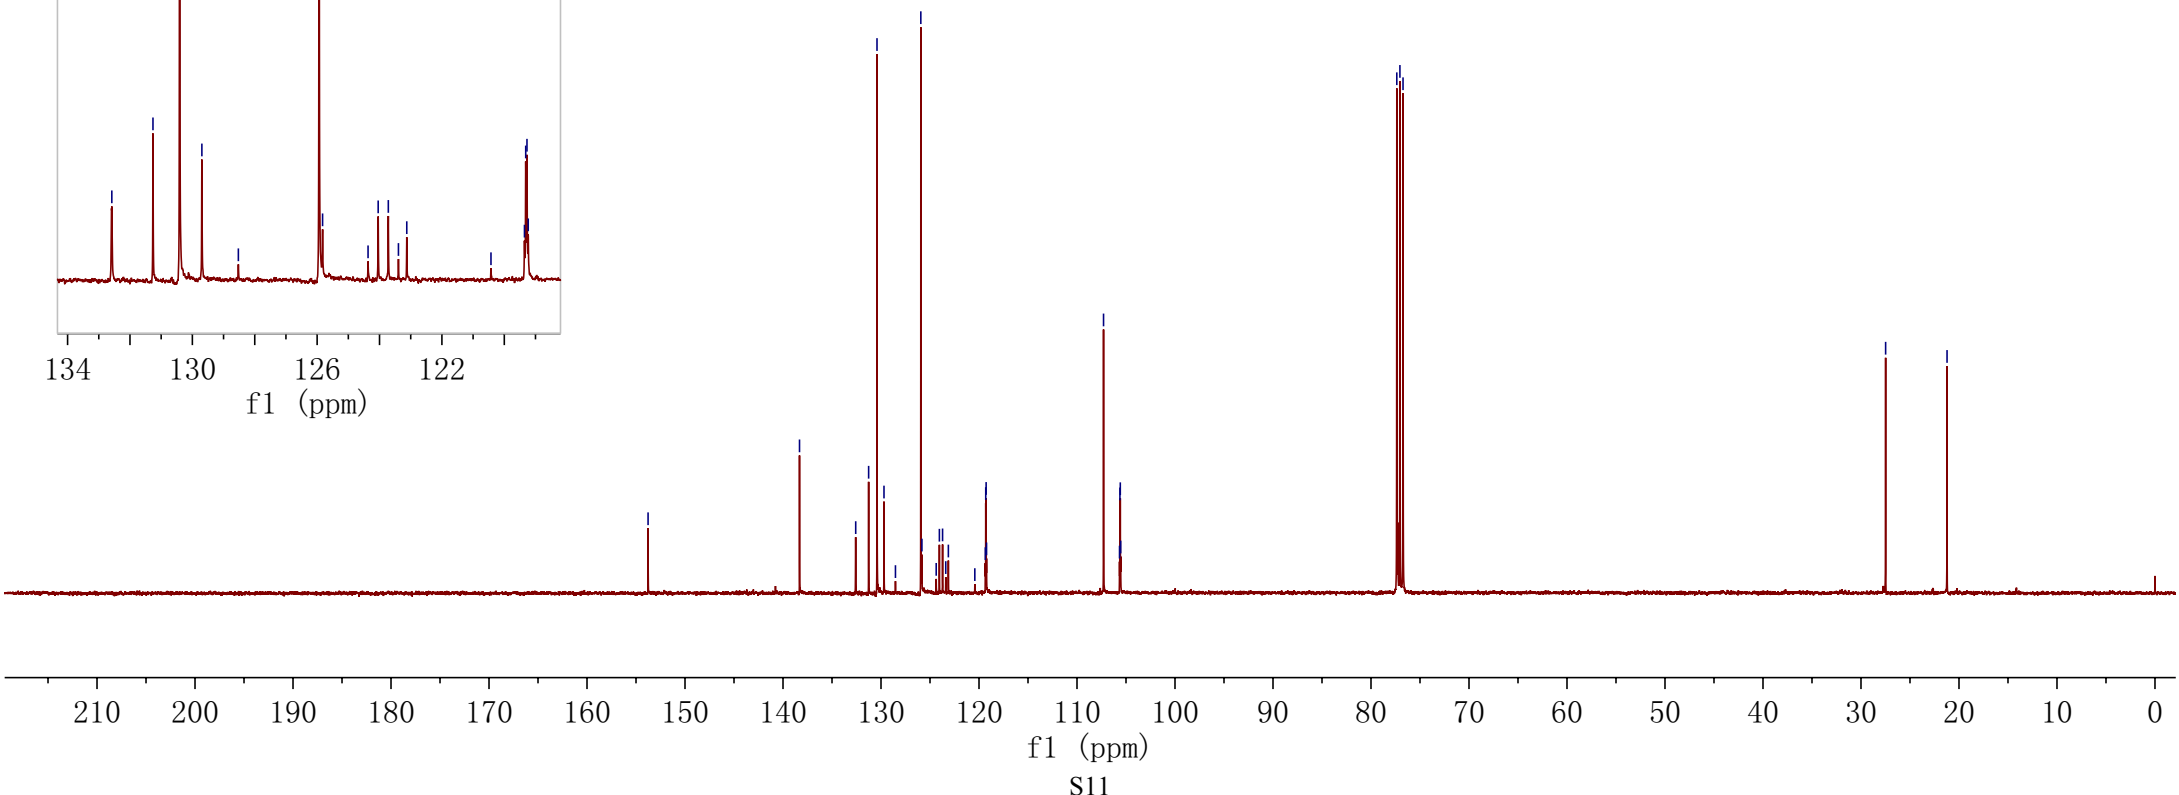

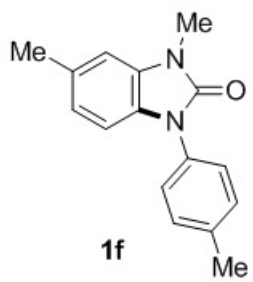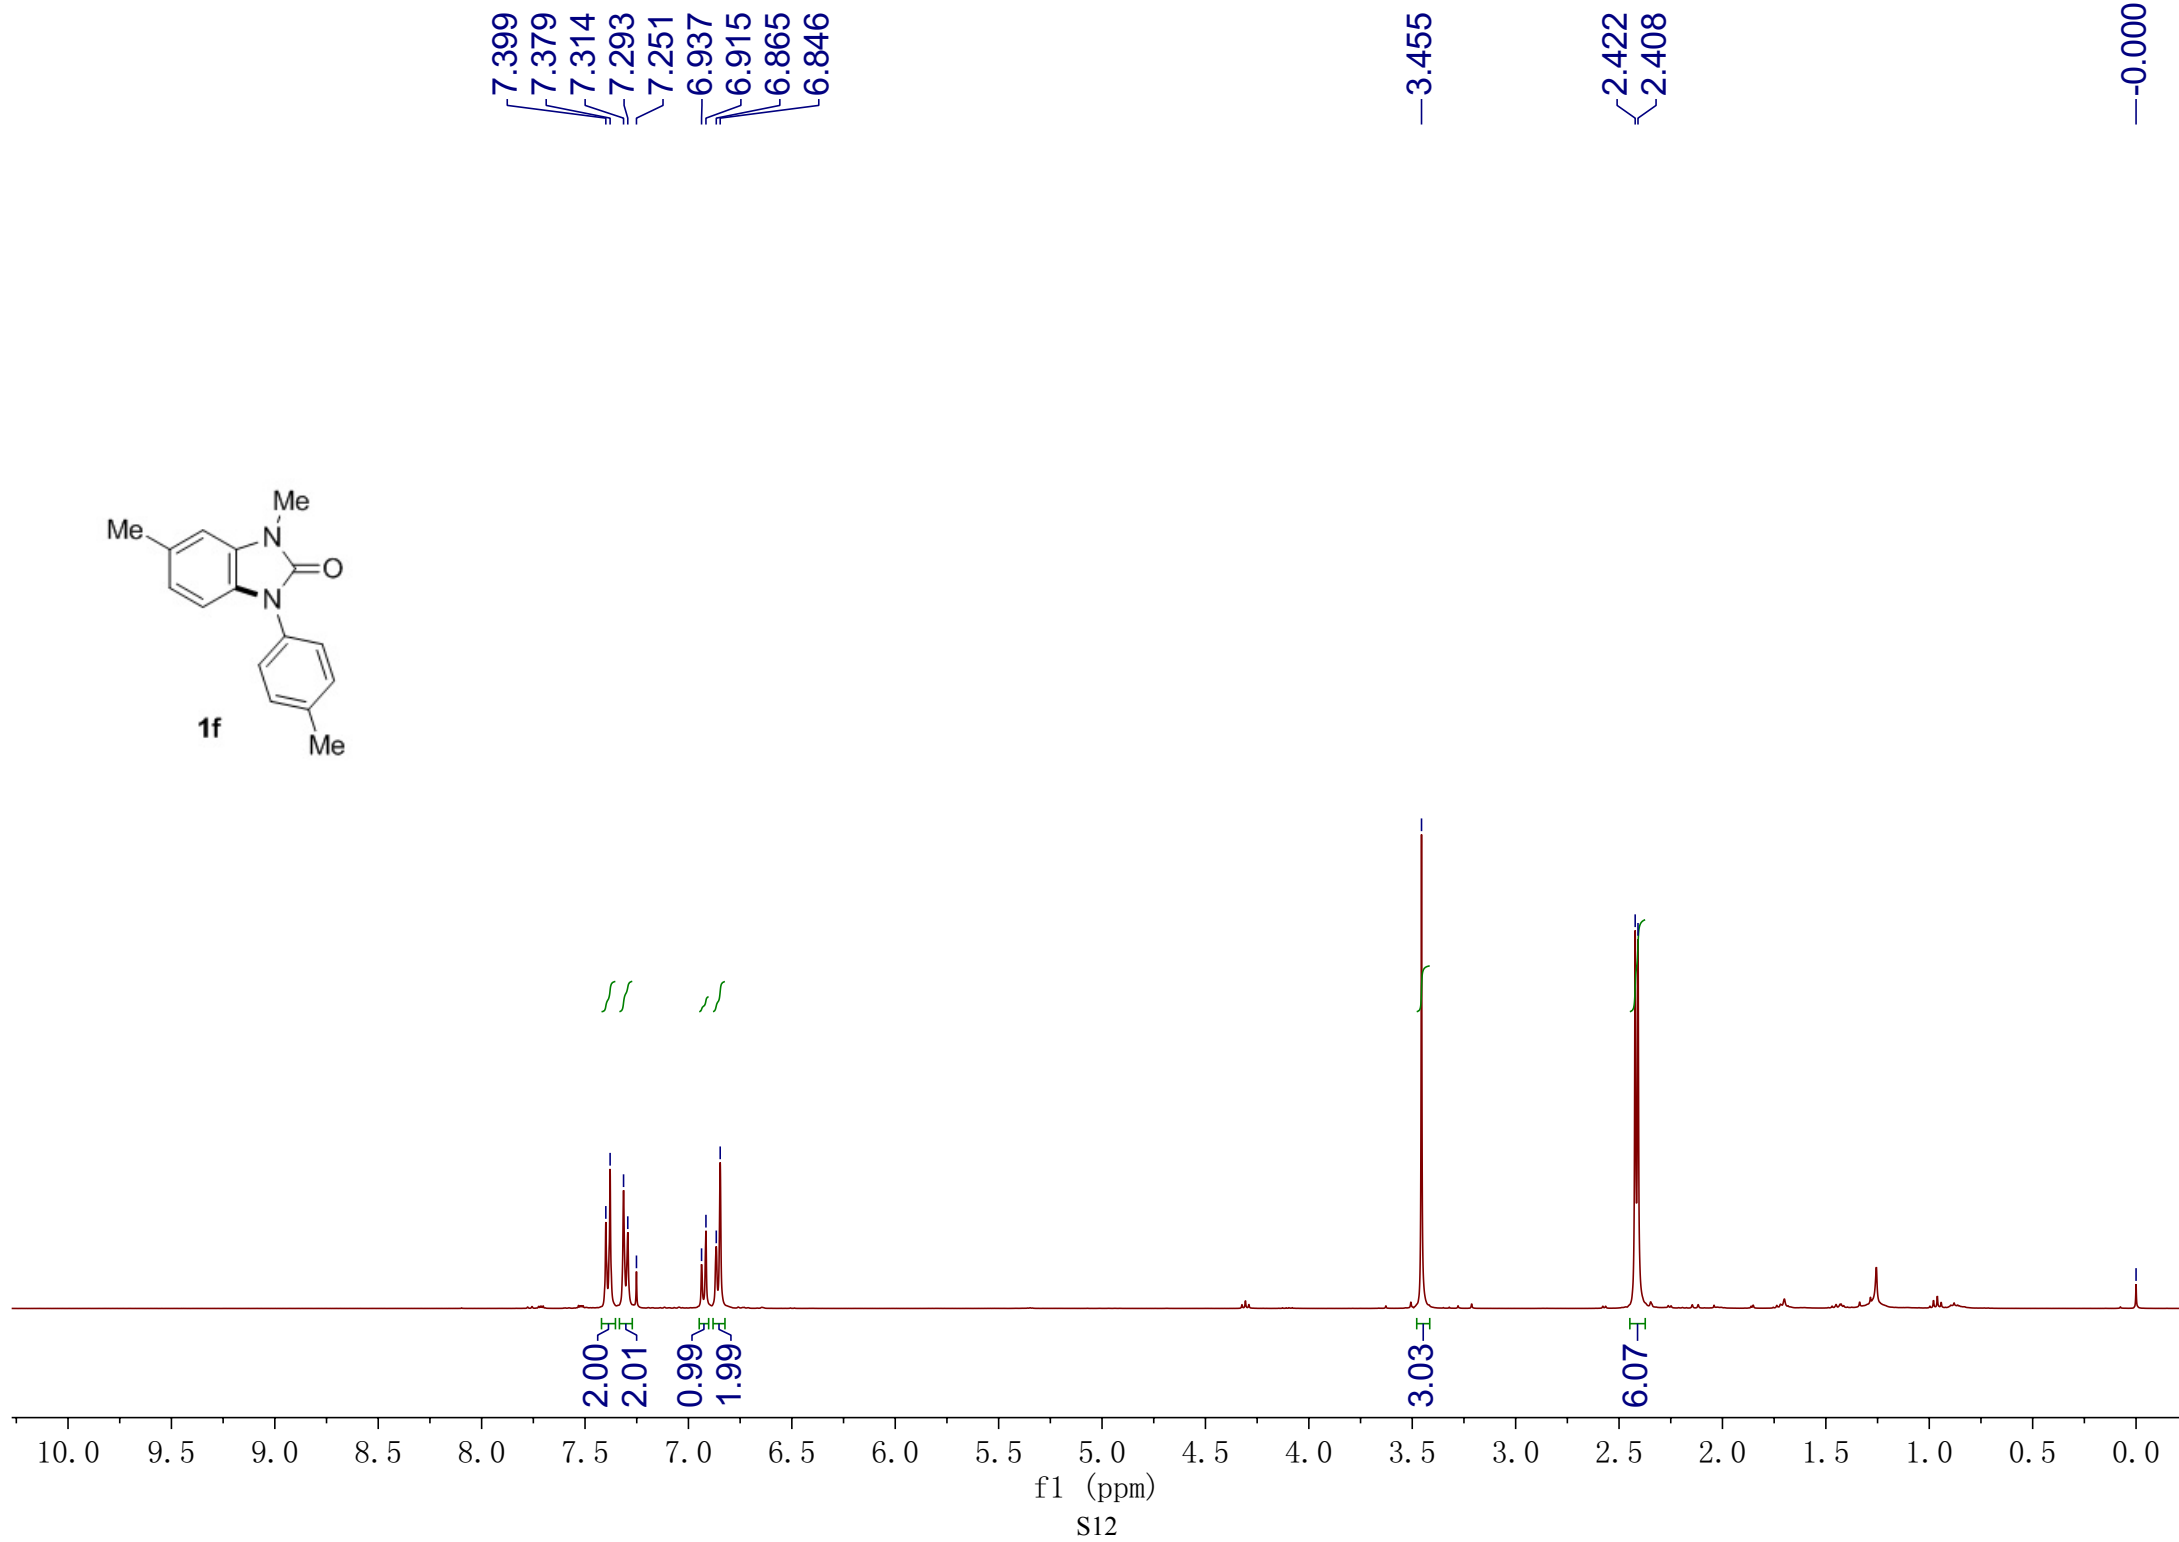



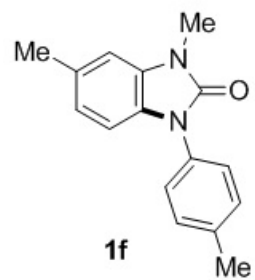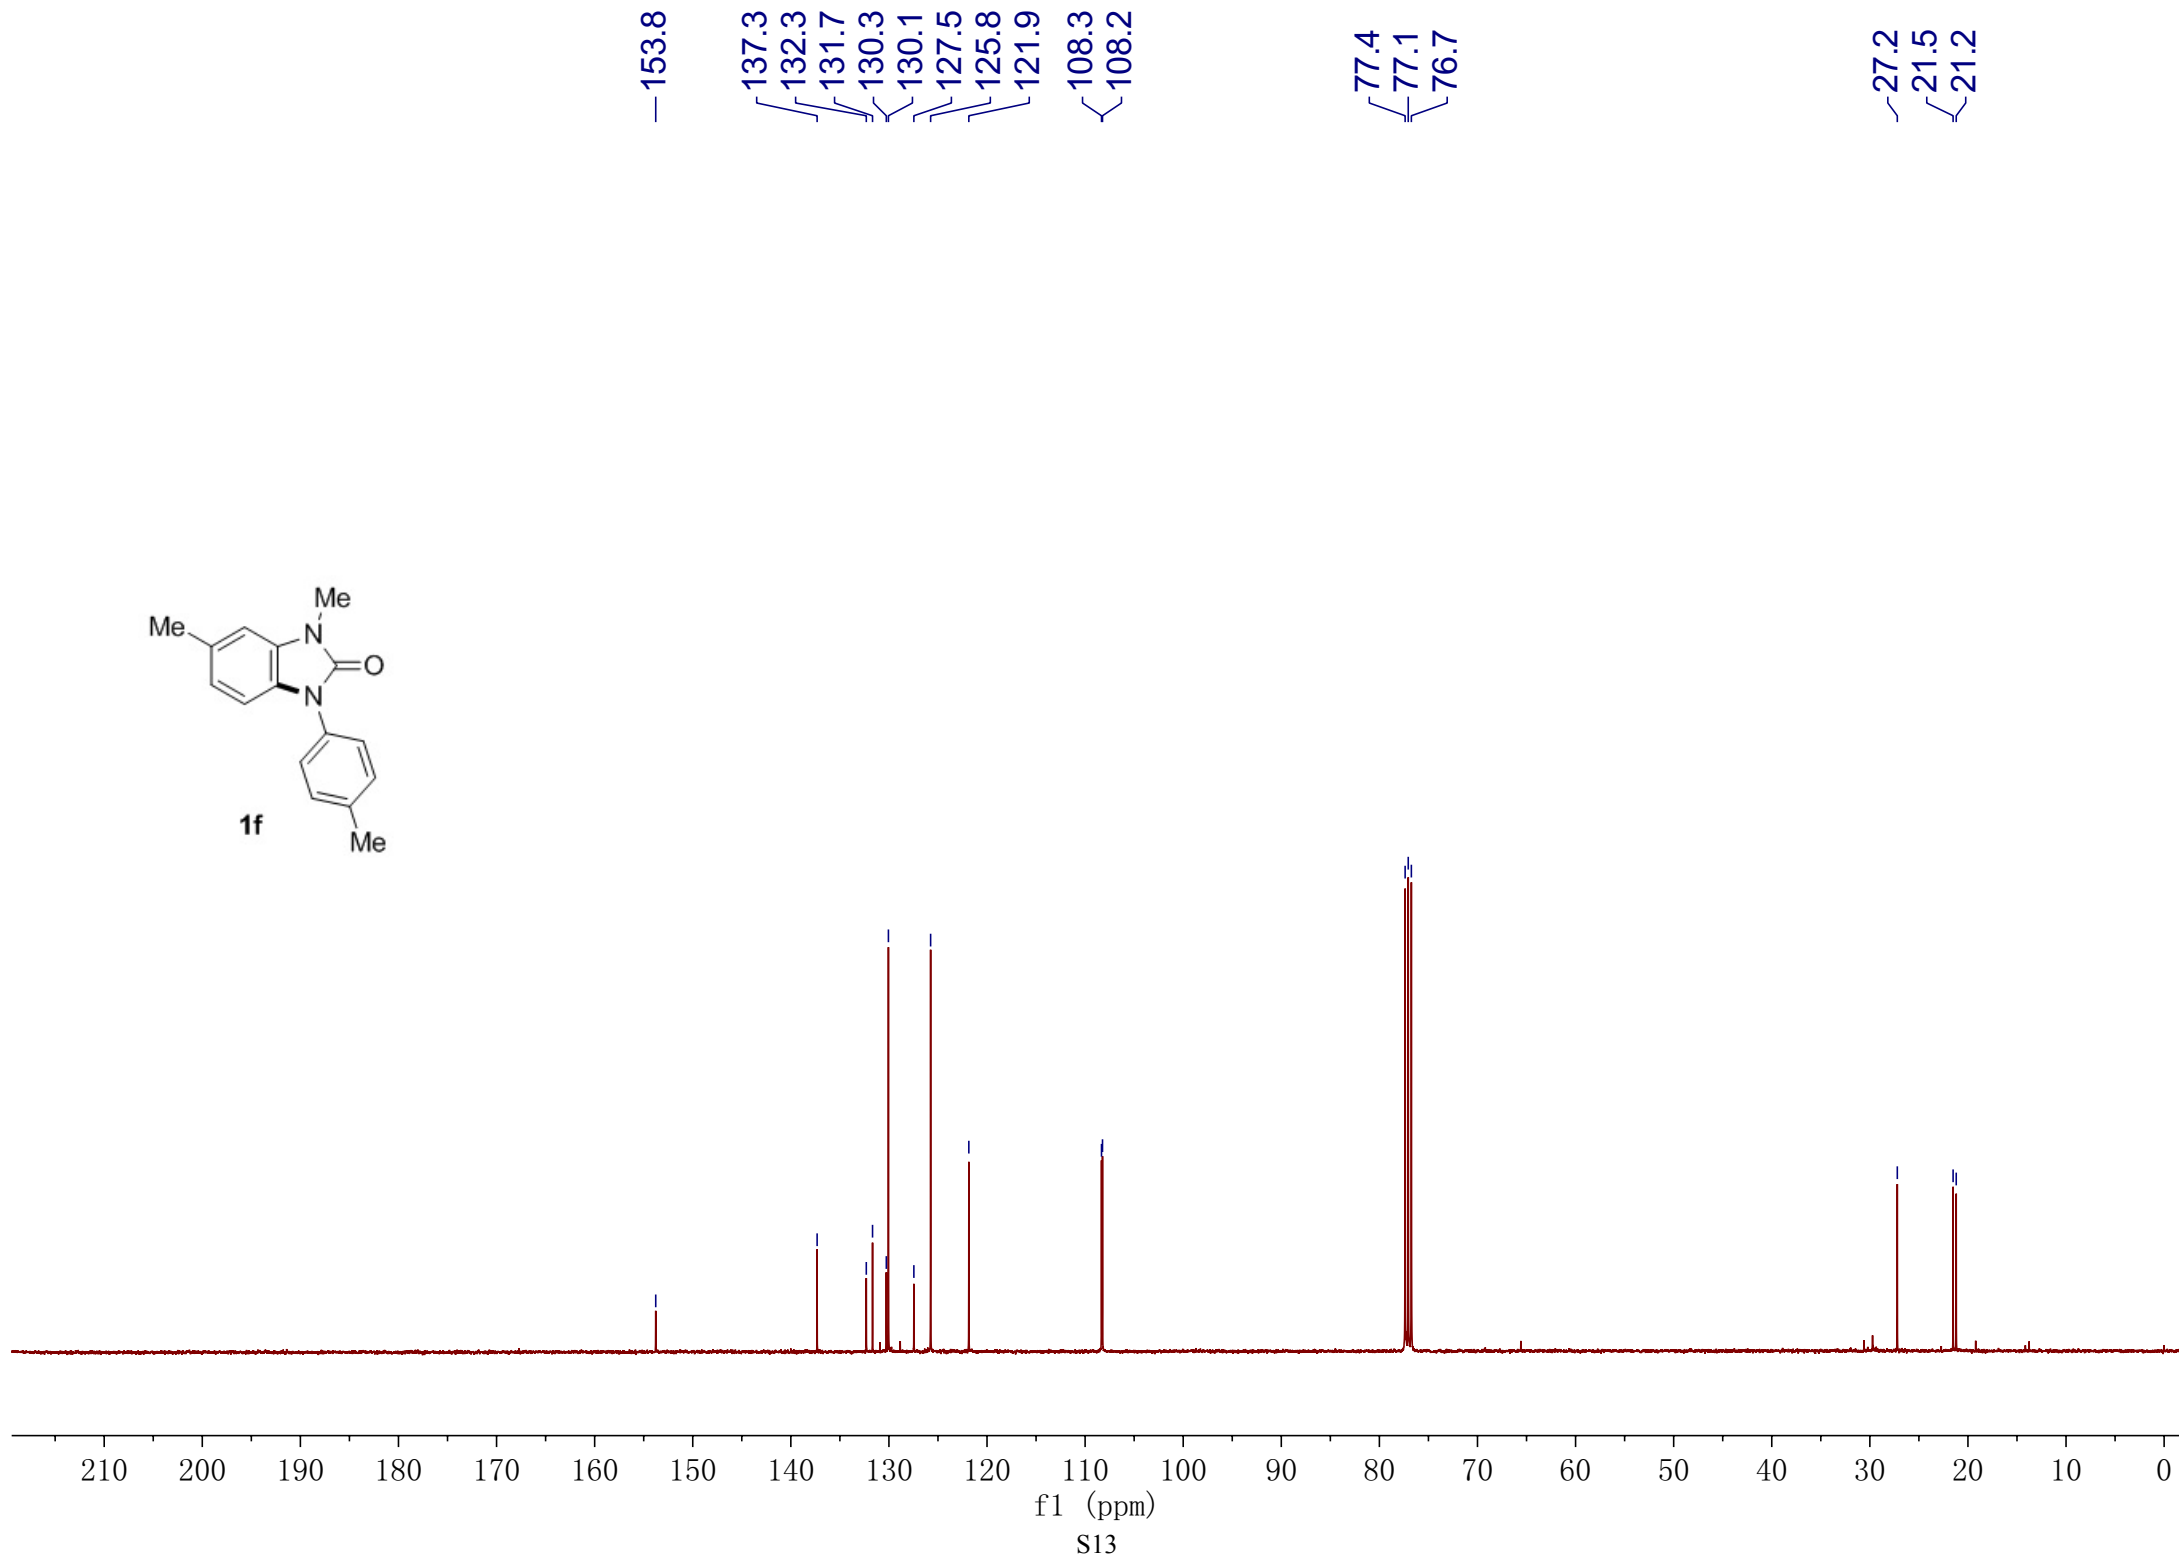

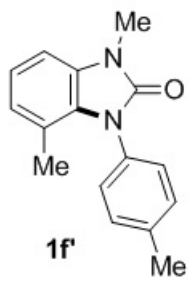

7.292  
7.270  
7.264  
7.257  
7.250  
7.242  
7.048  
7.029  
7.009  
6.896  
6.877  
6.813  
6.793

-3.457

-2.423

-1.862

-0.000

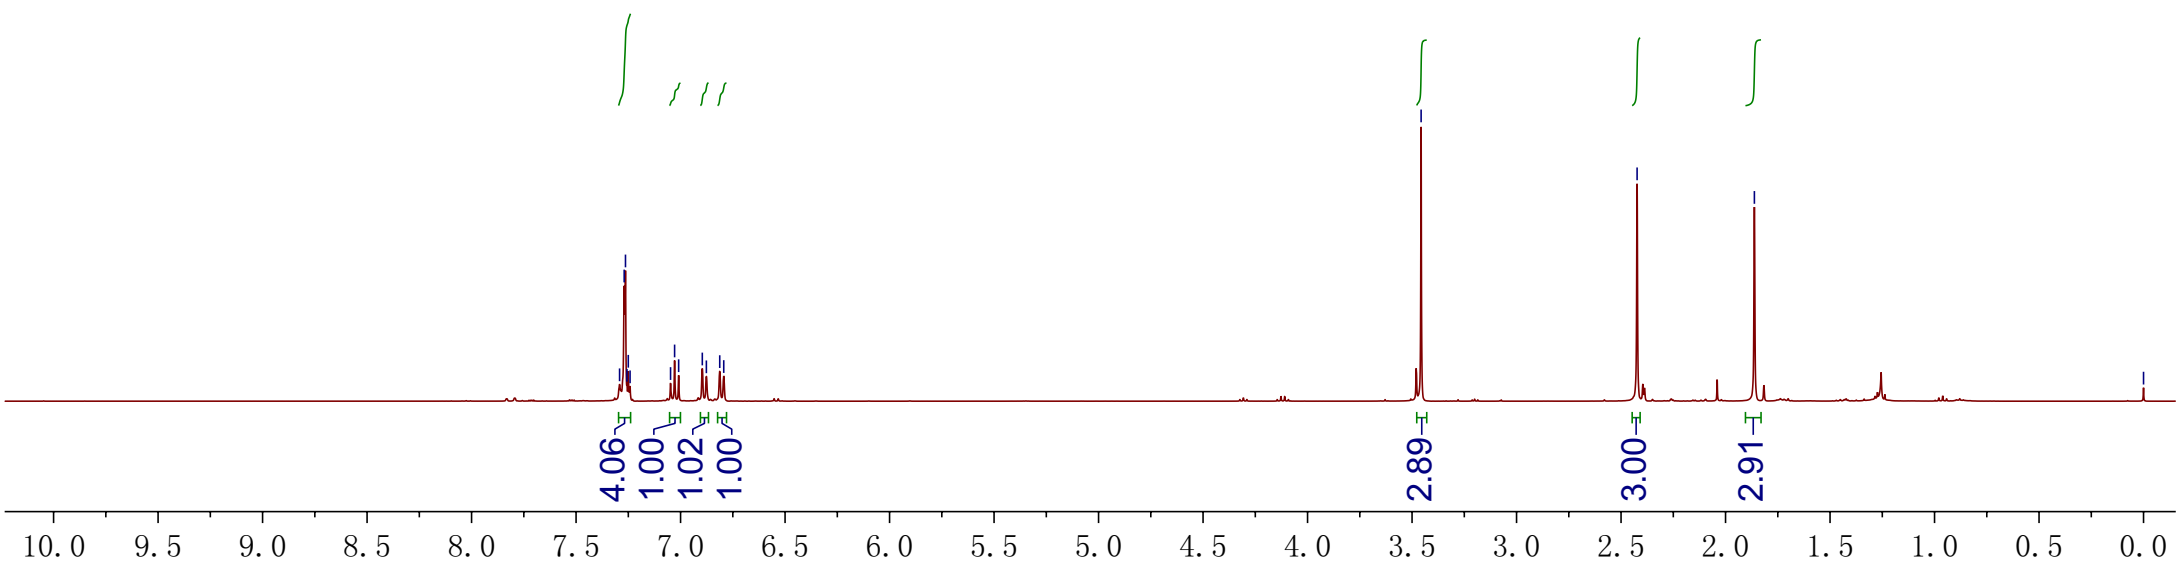

f1 (ppm)

S14

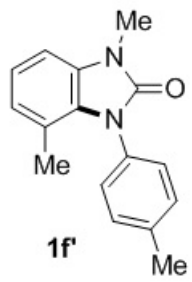

—154.7

138.6

133.5

130.5

129.7

128.9

127.8

124.6

121.4

120.1

—105.4

77.4

77.1

76.8

~27.3

~21.3

~18.1

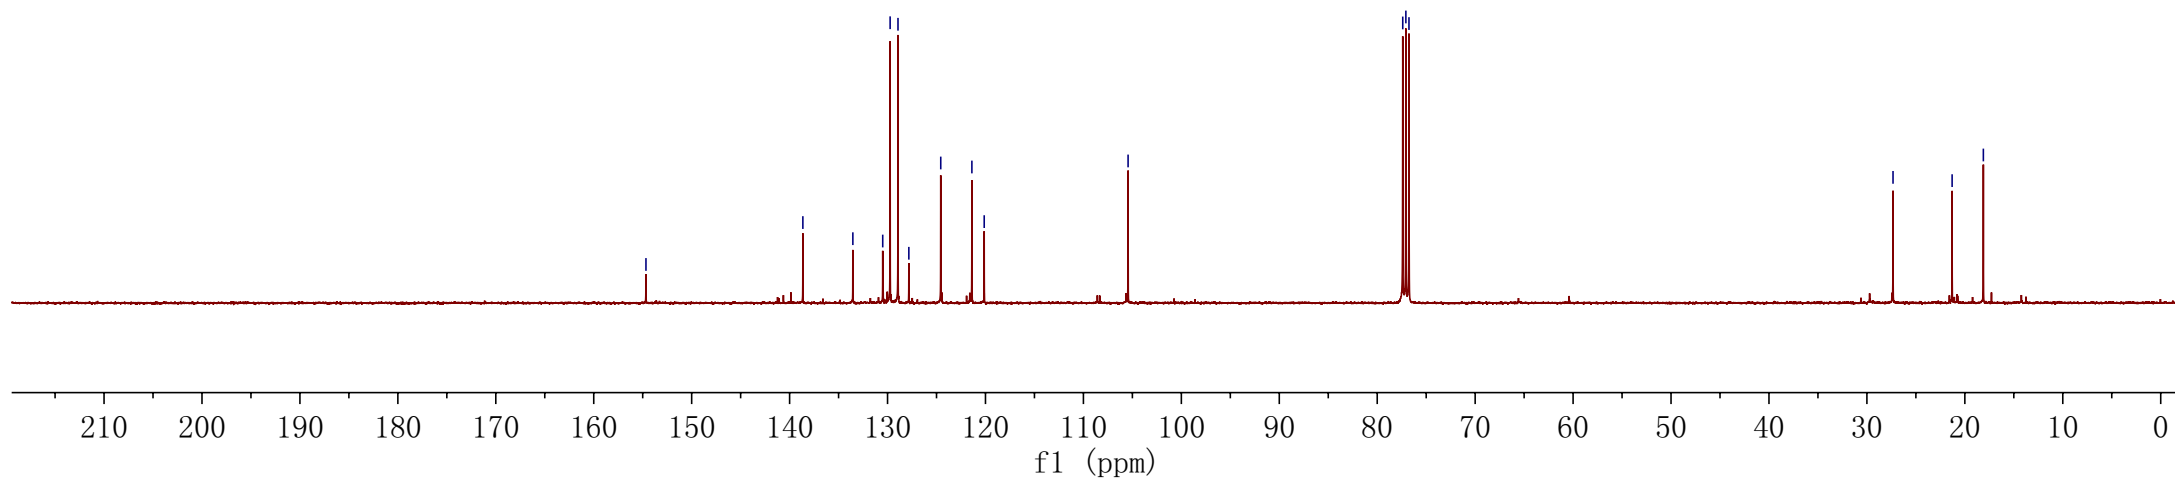

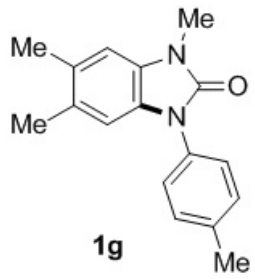

7.397  
7.393  
7.381  
7.376  
7.322  
7.301  
7.252  
6.825  
6.813

-3.442

2.414  
2.321  
2.245

-0.000

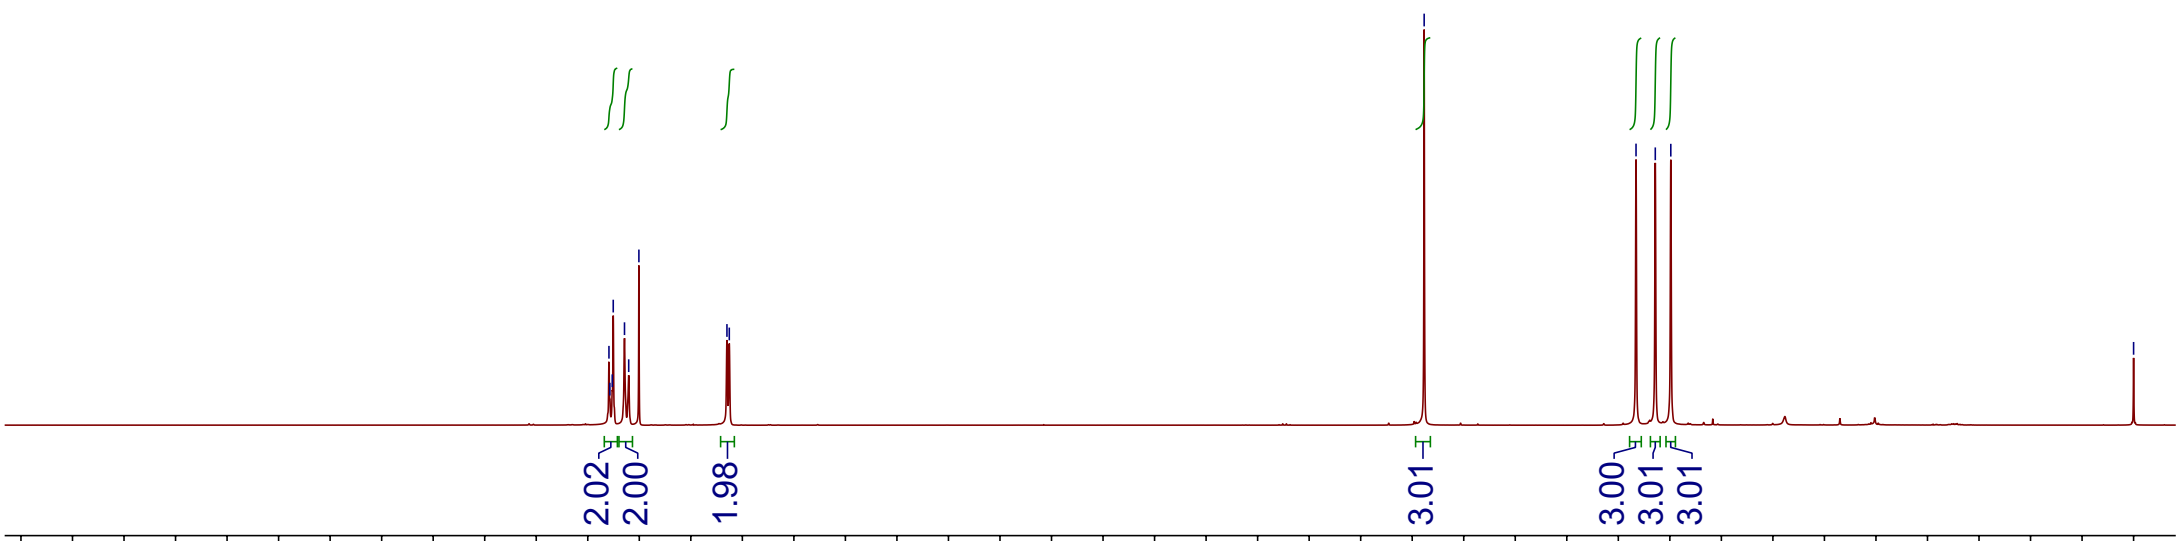

10.0 9.5 9.0 8.5 8.0 7.5 7.0 6.5 6.0 5.5 5.0 4.5 4.0 3.5 3.0 2.5 2.0 1.5 1.0 0.5 0.0

f1 (ppm)

S16

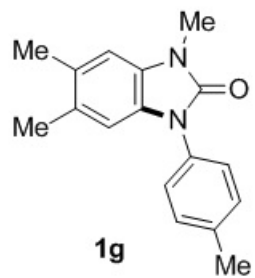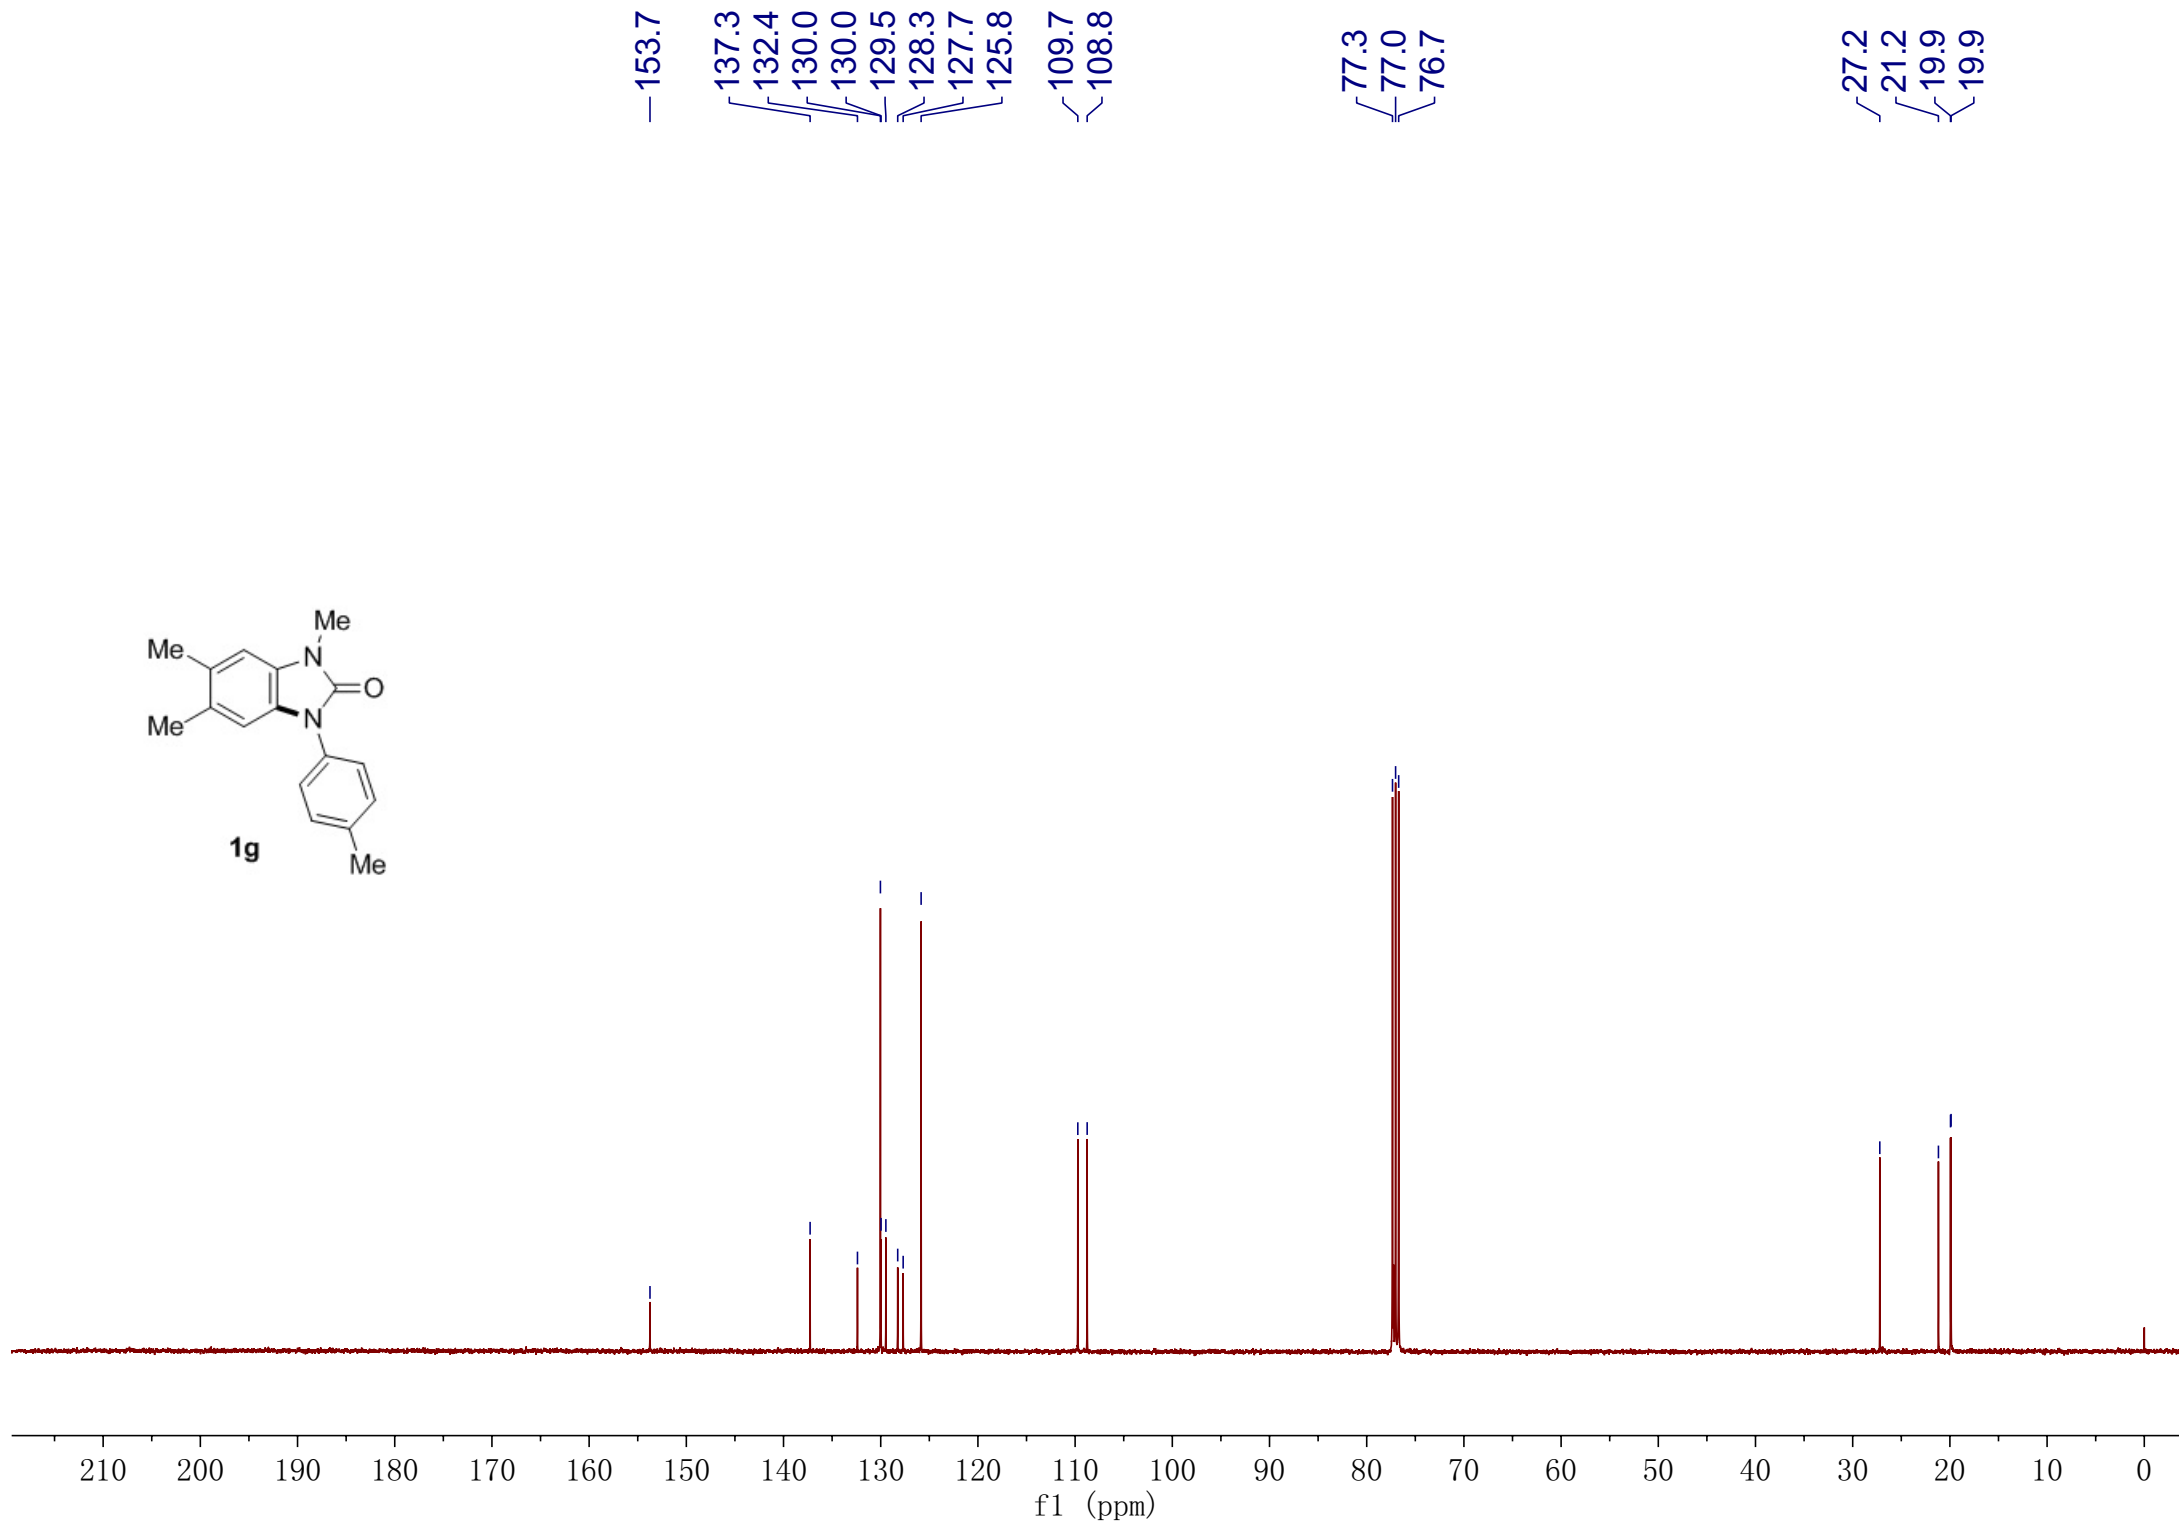

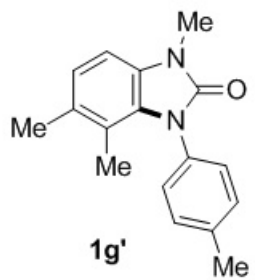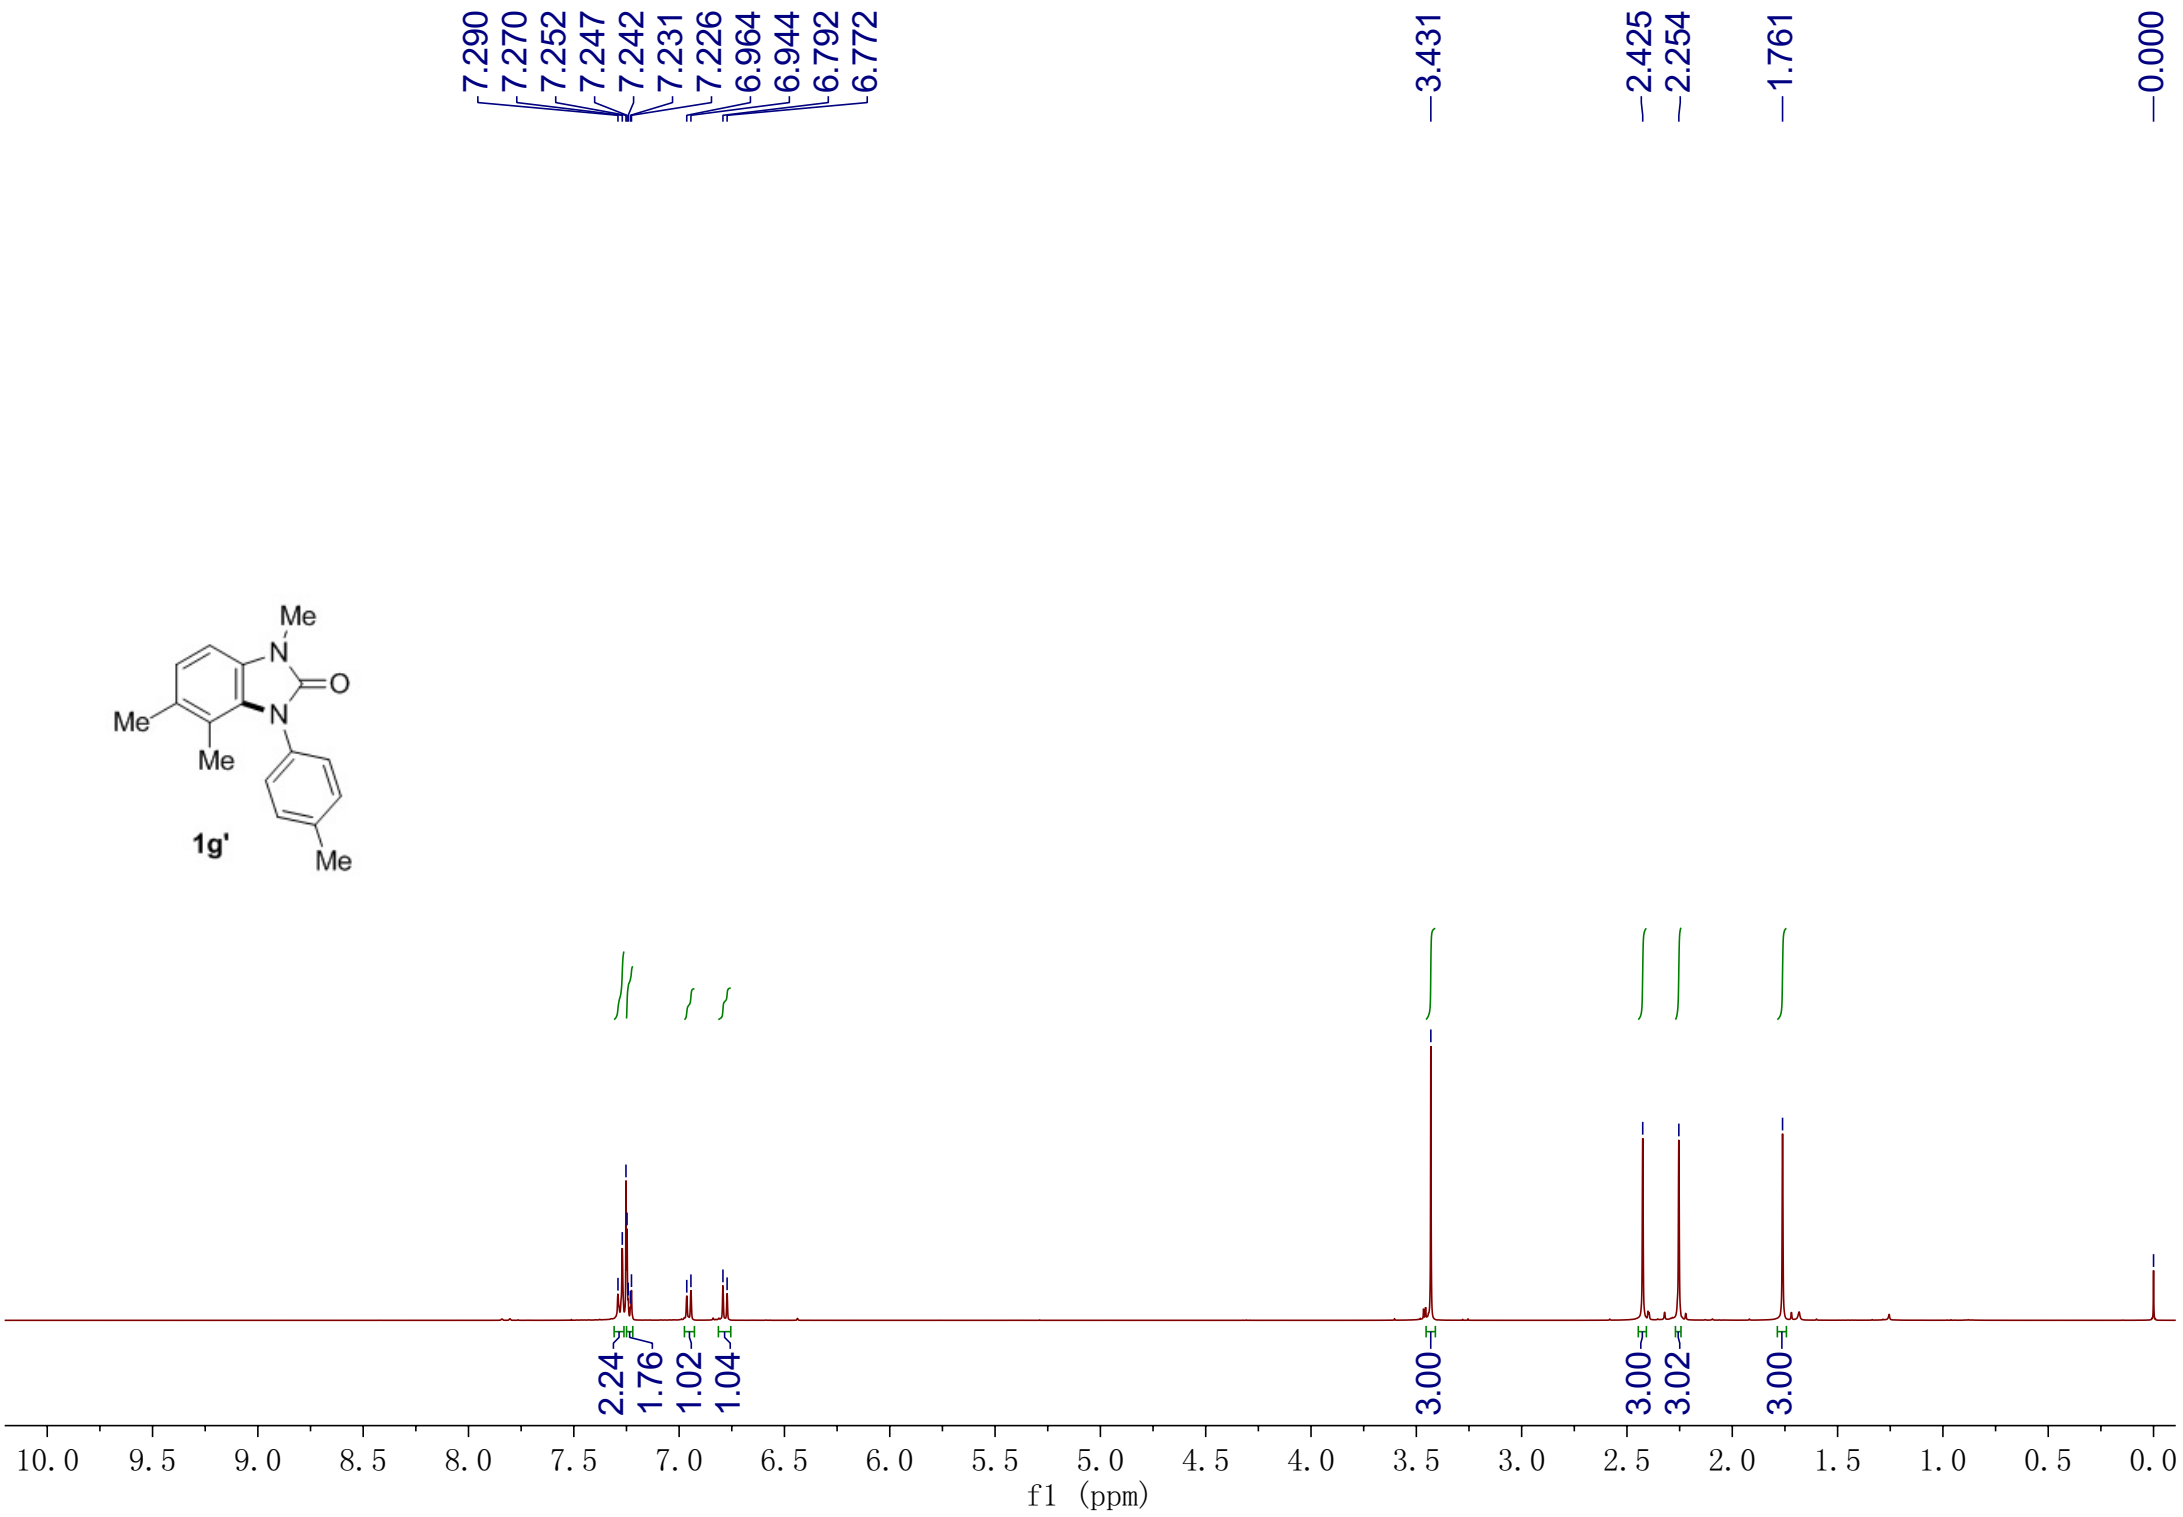

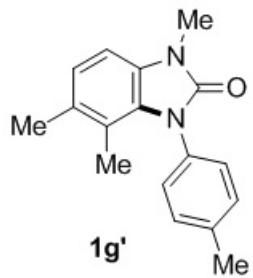

—154.9

138.4

134.1

130.8

129.8

129.0

128.7

128.2

122.9

119.0

—104.7

77.3

77.0

76.7

~27.2

~21.3

~20.0

~14.0

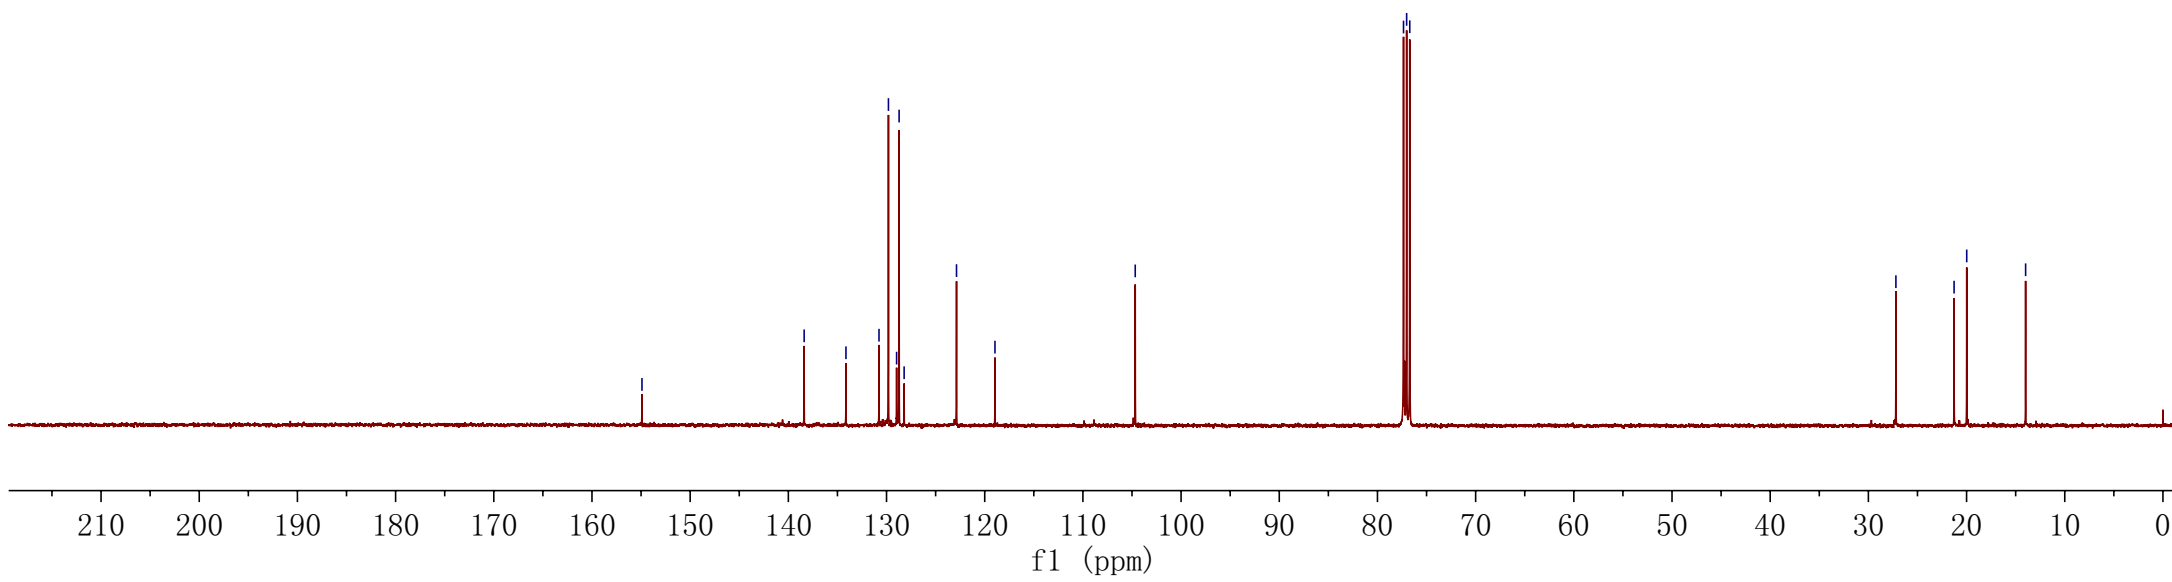

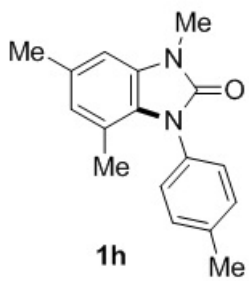

7.276  
7.271  
7.255  
7.247  
7.240  
7.239  
7.232  
7.226  
6.703  
6.621

3.423

2.411  
2.372

1.822

0.000

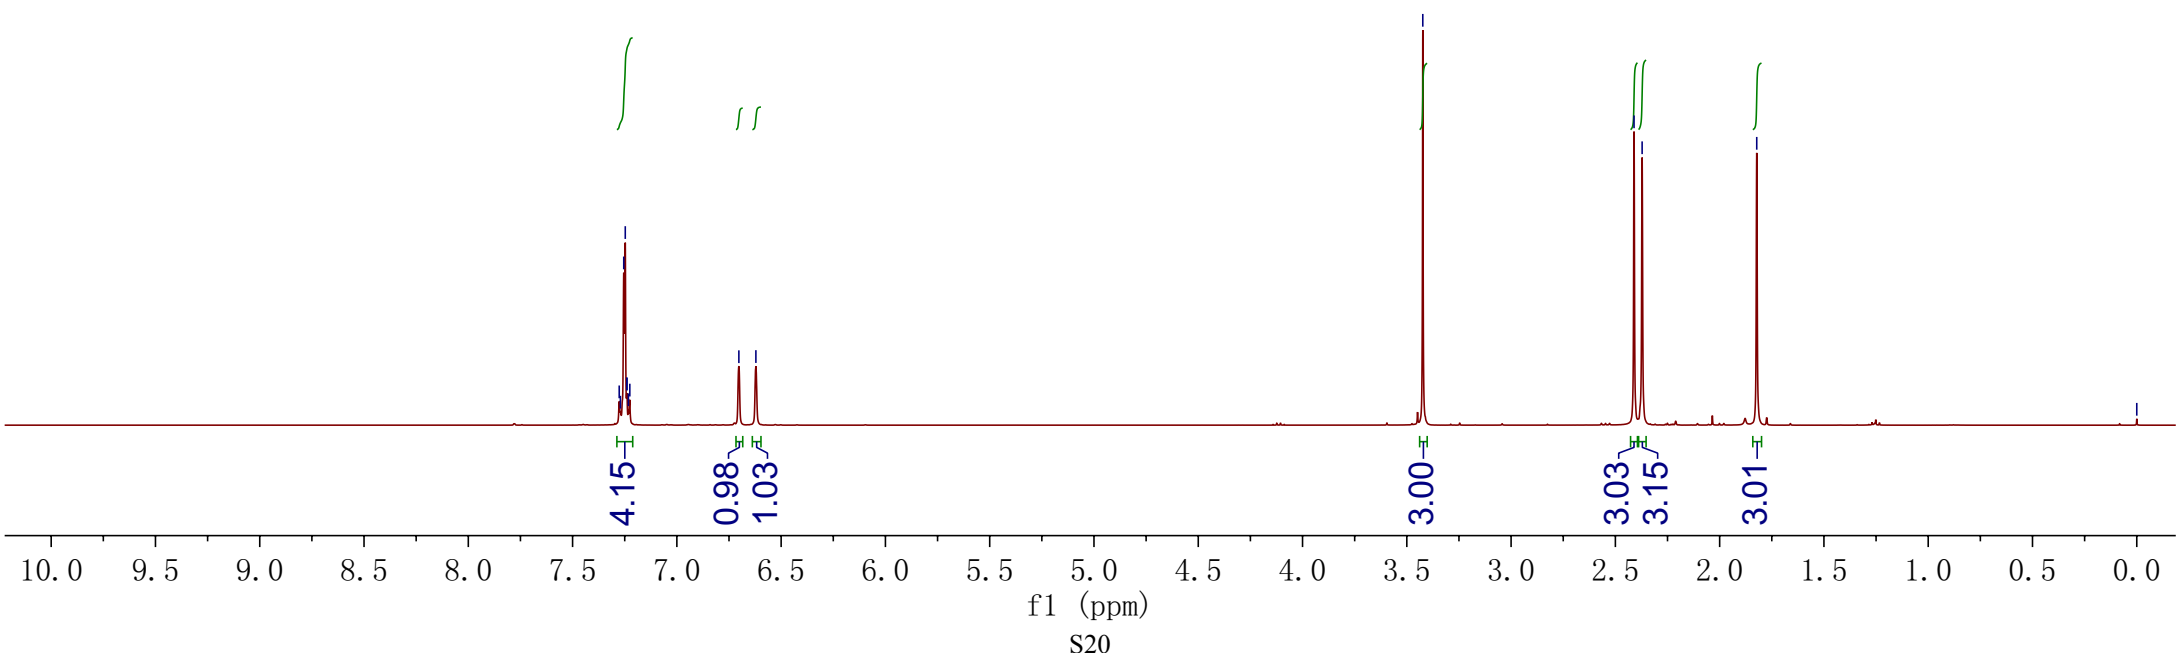



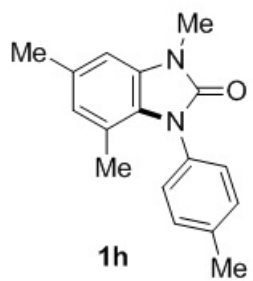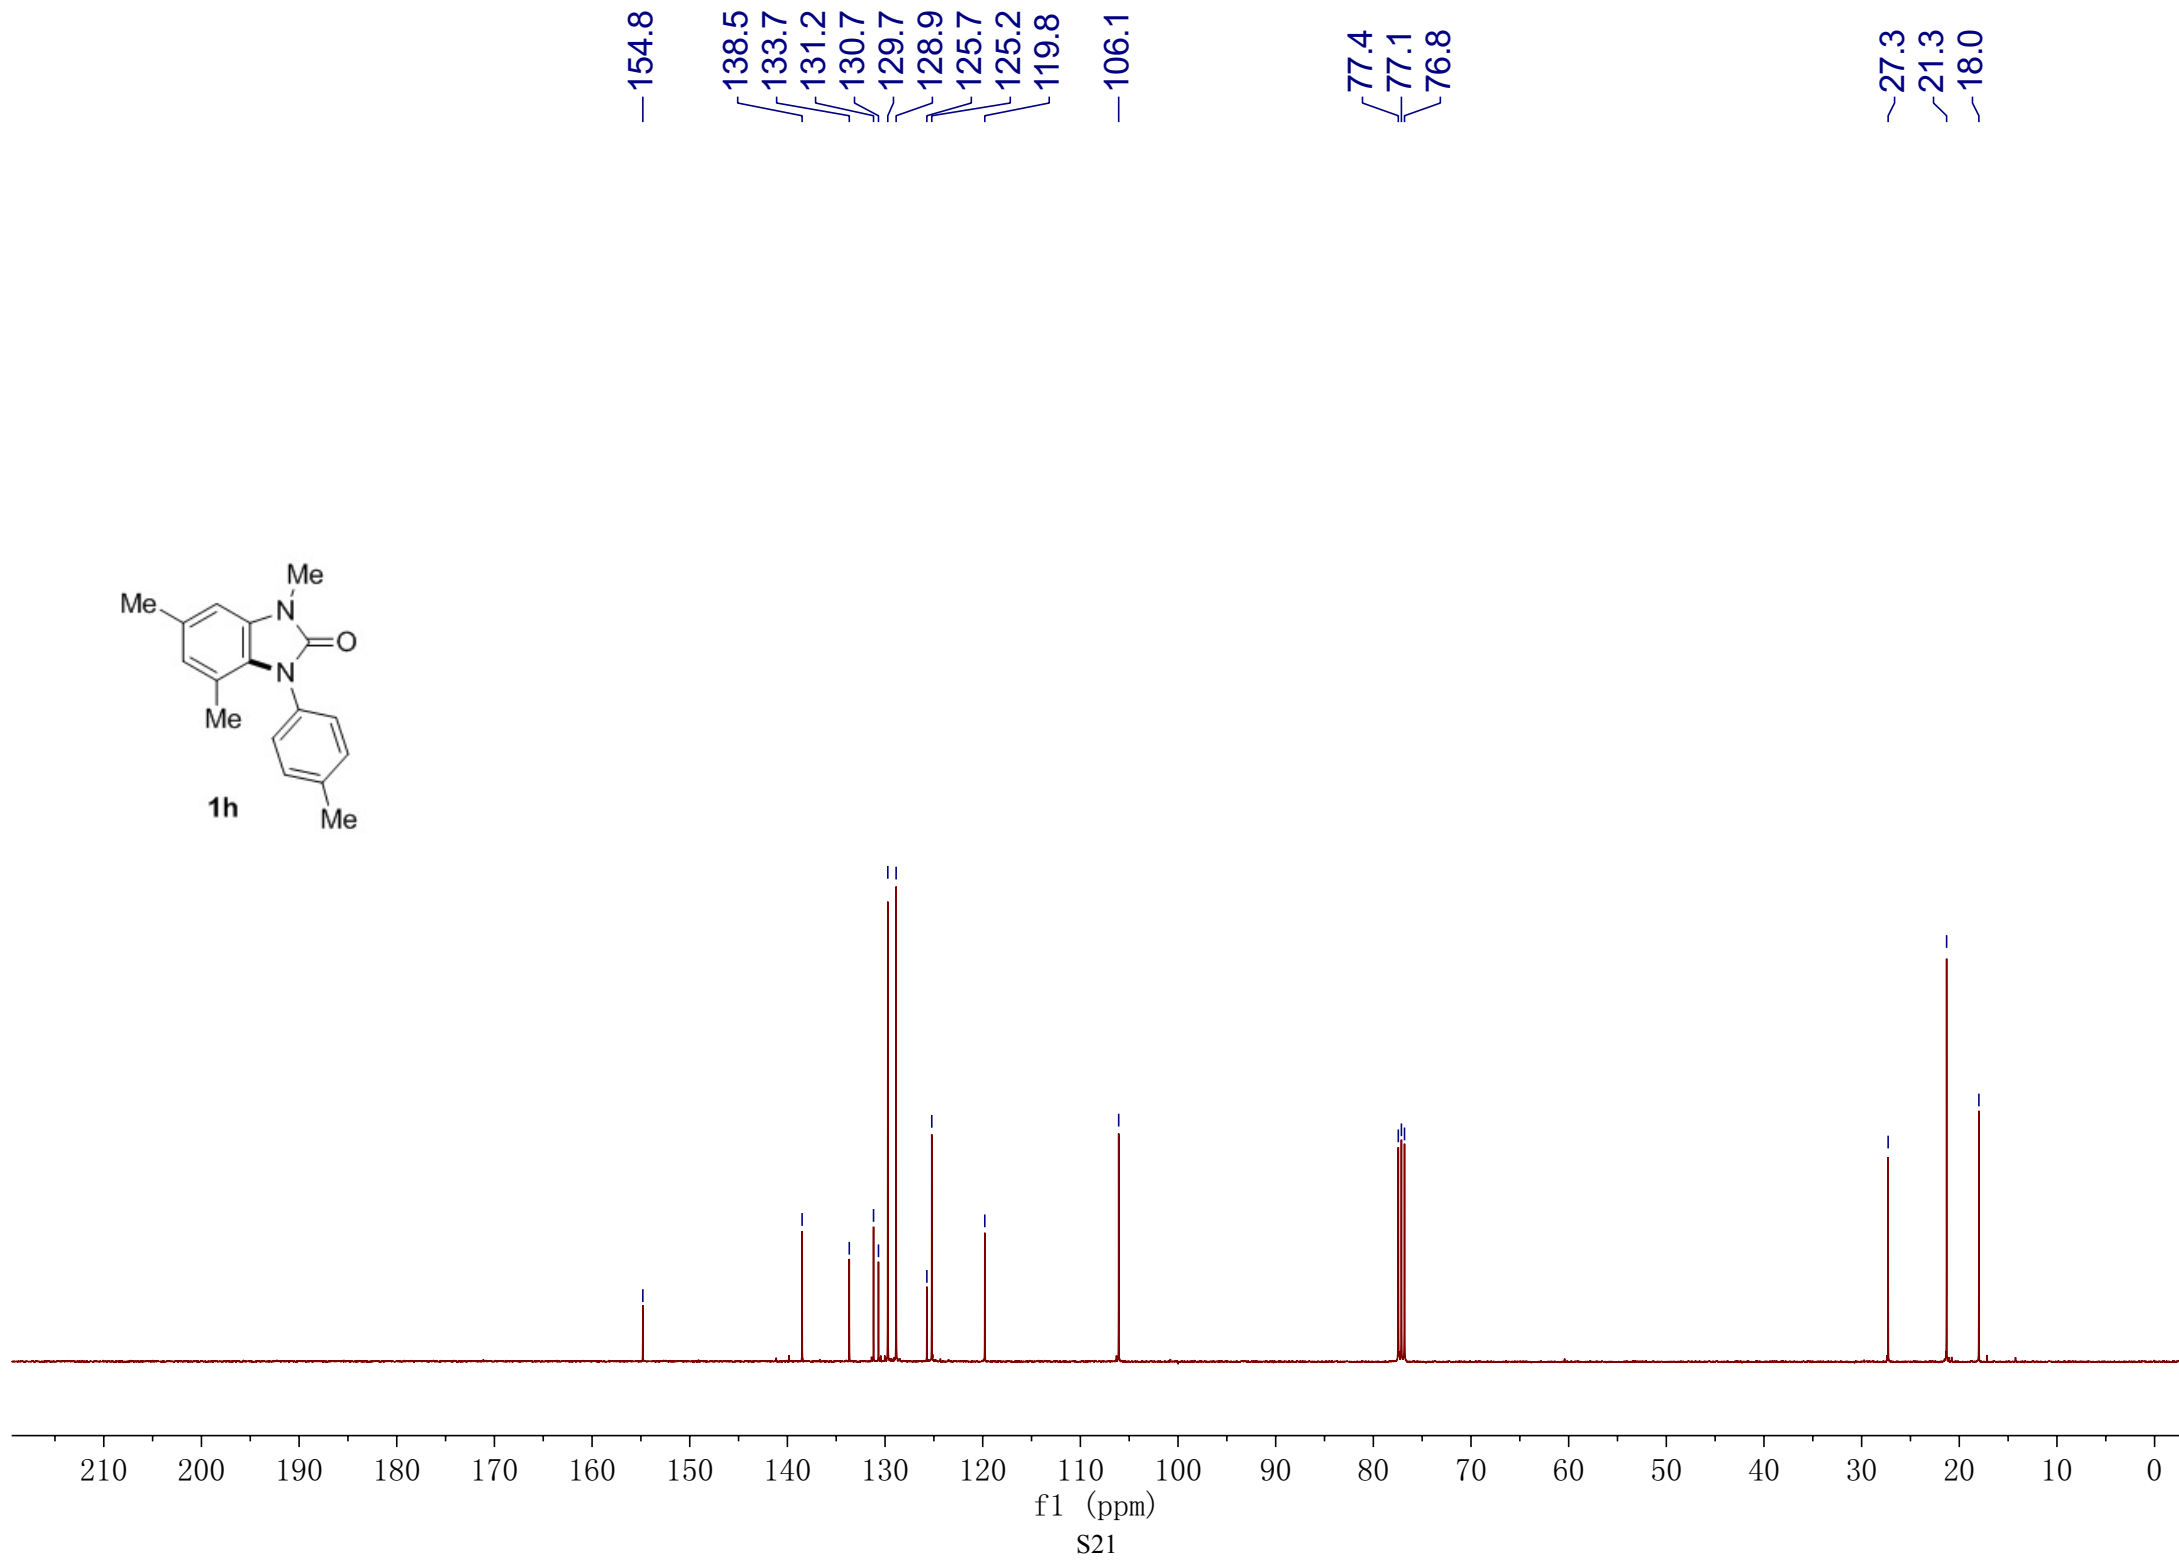

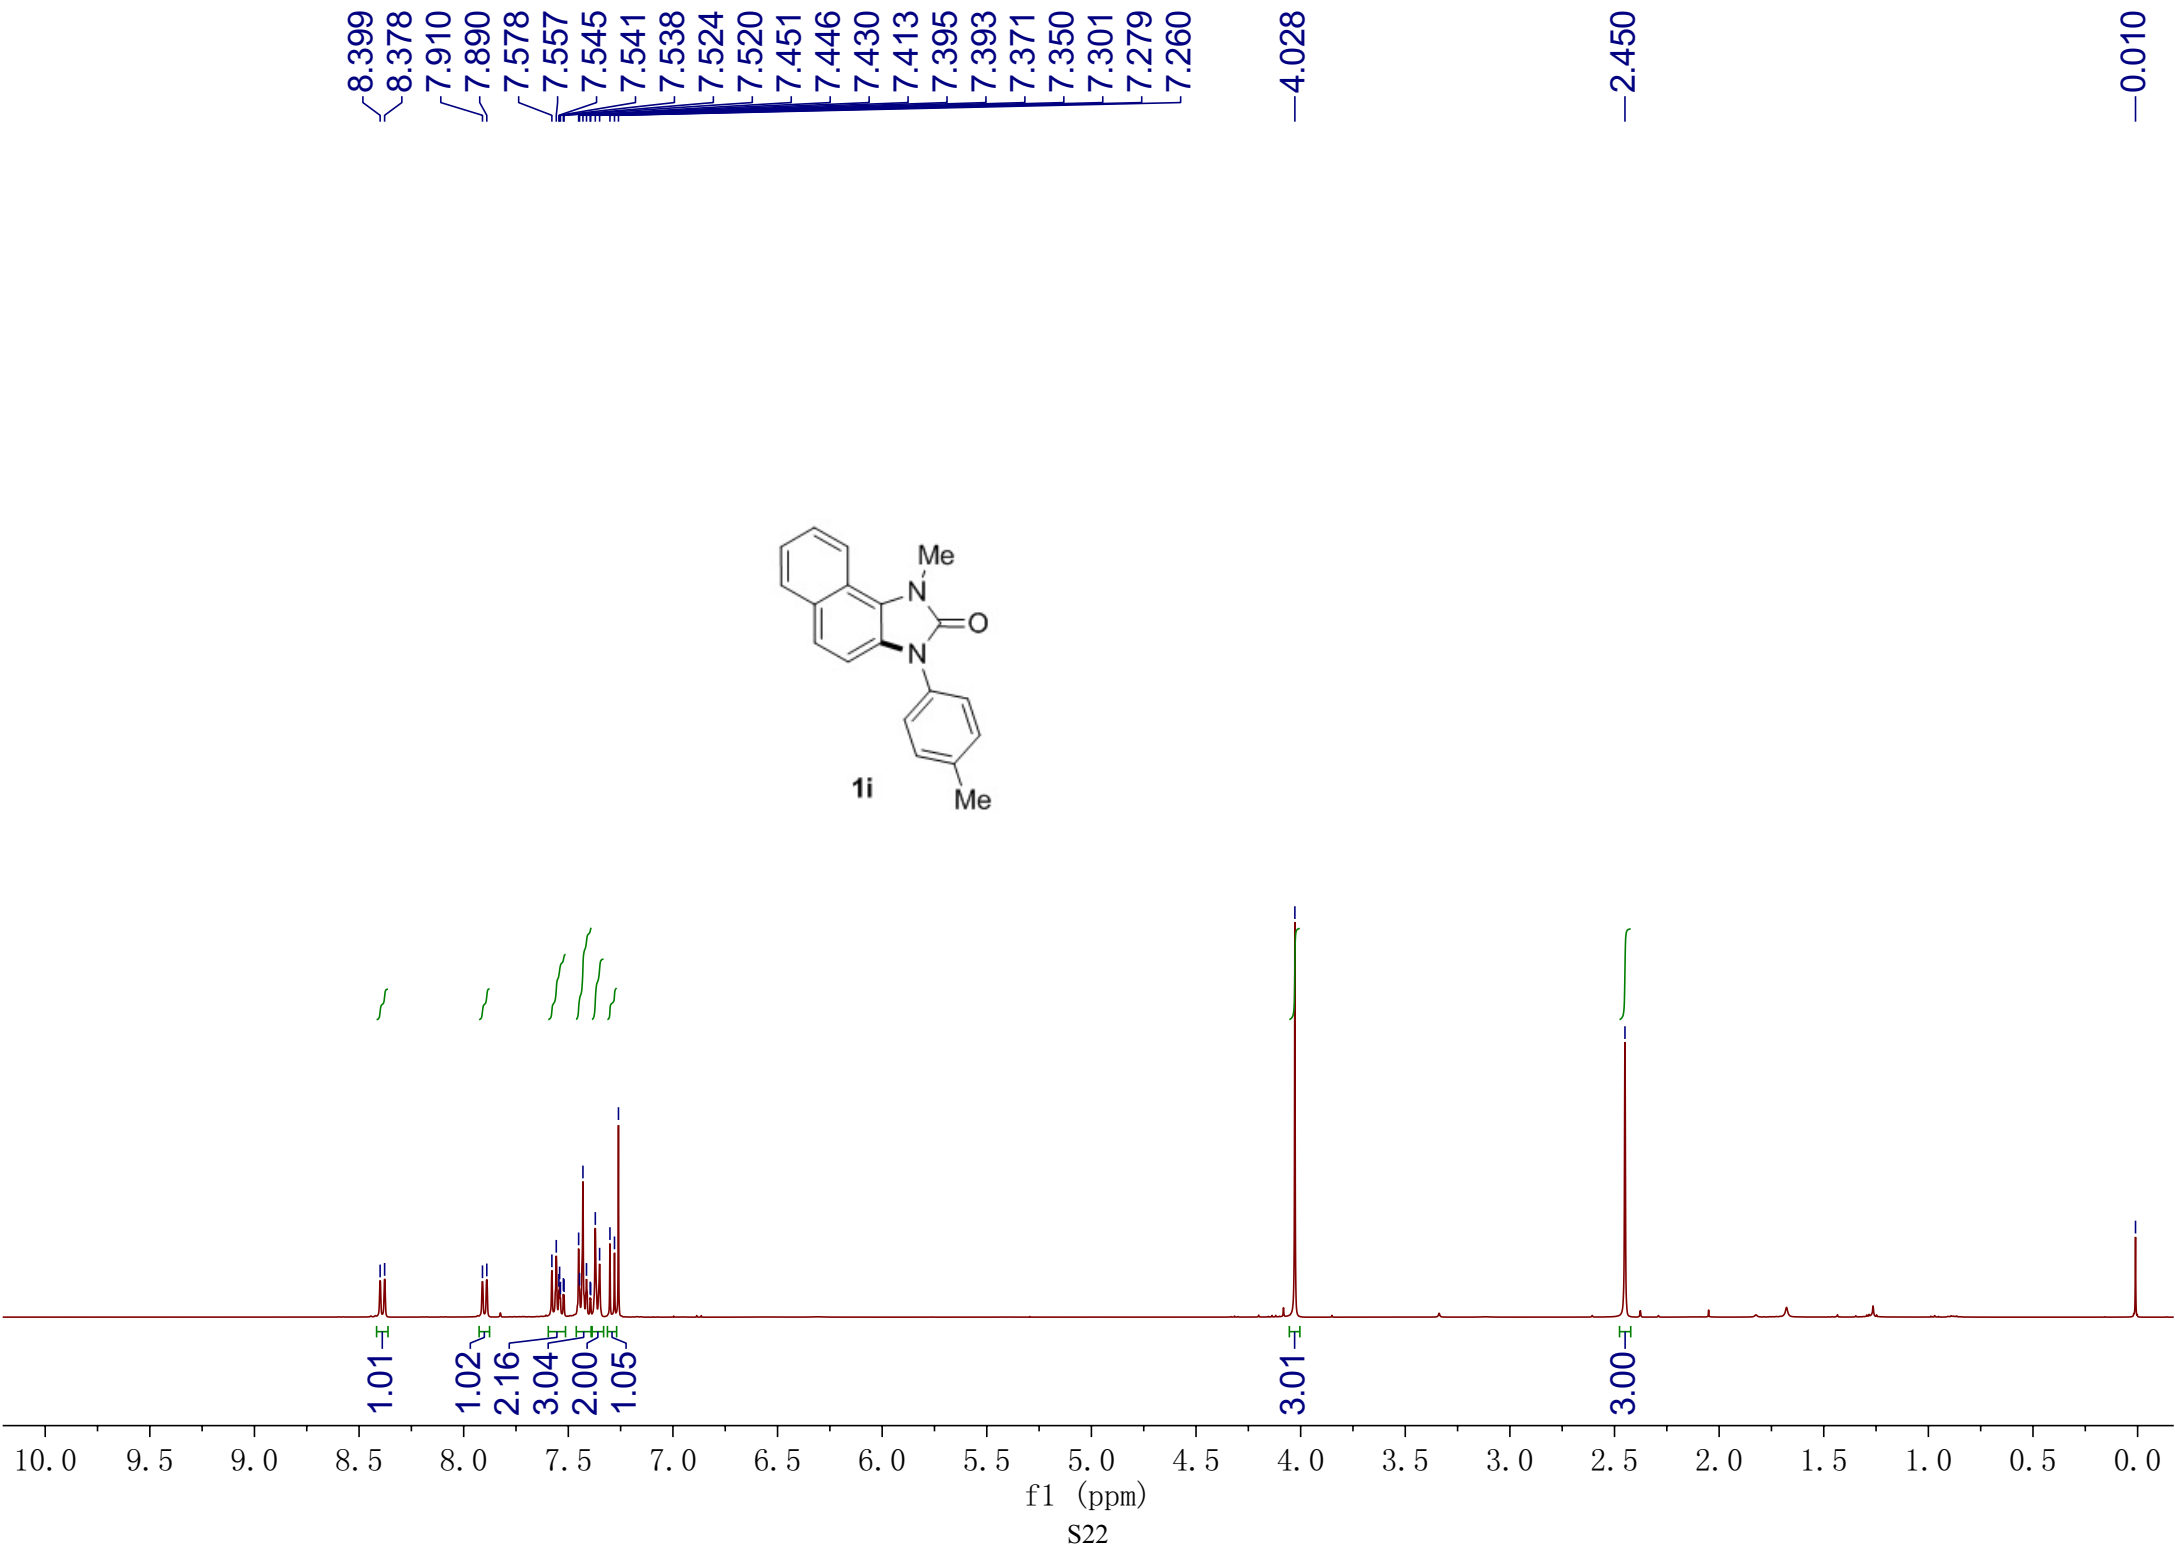

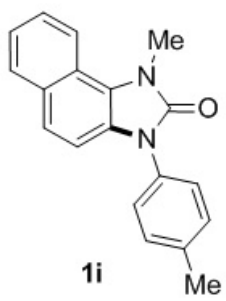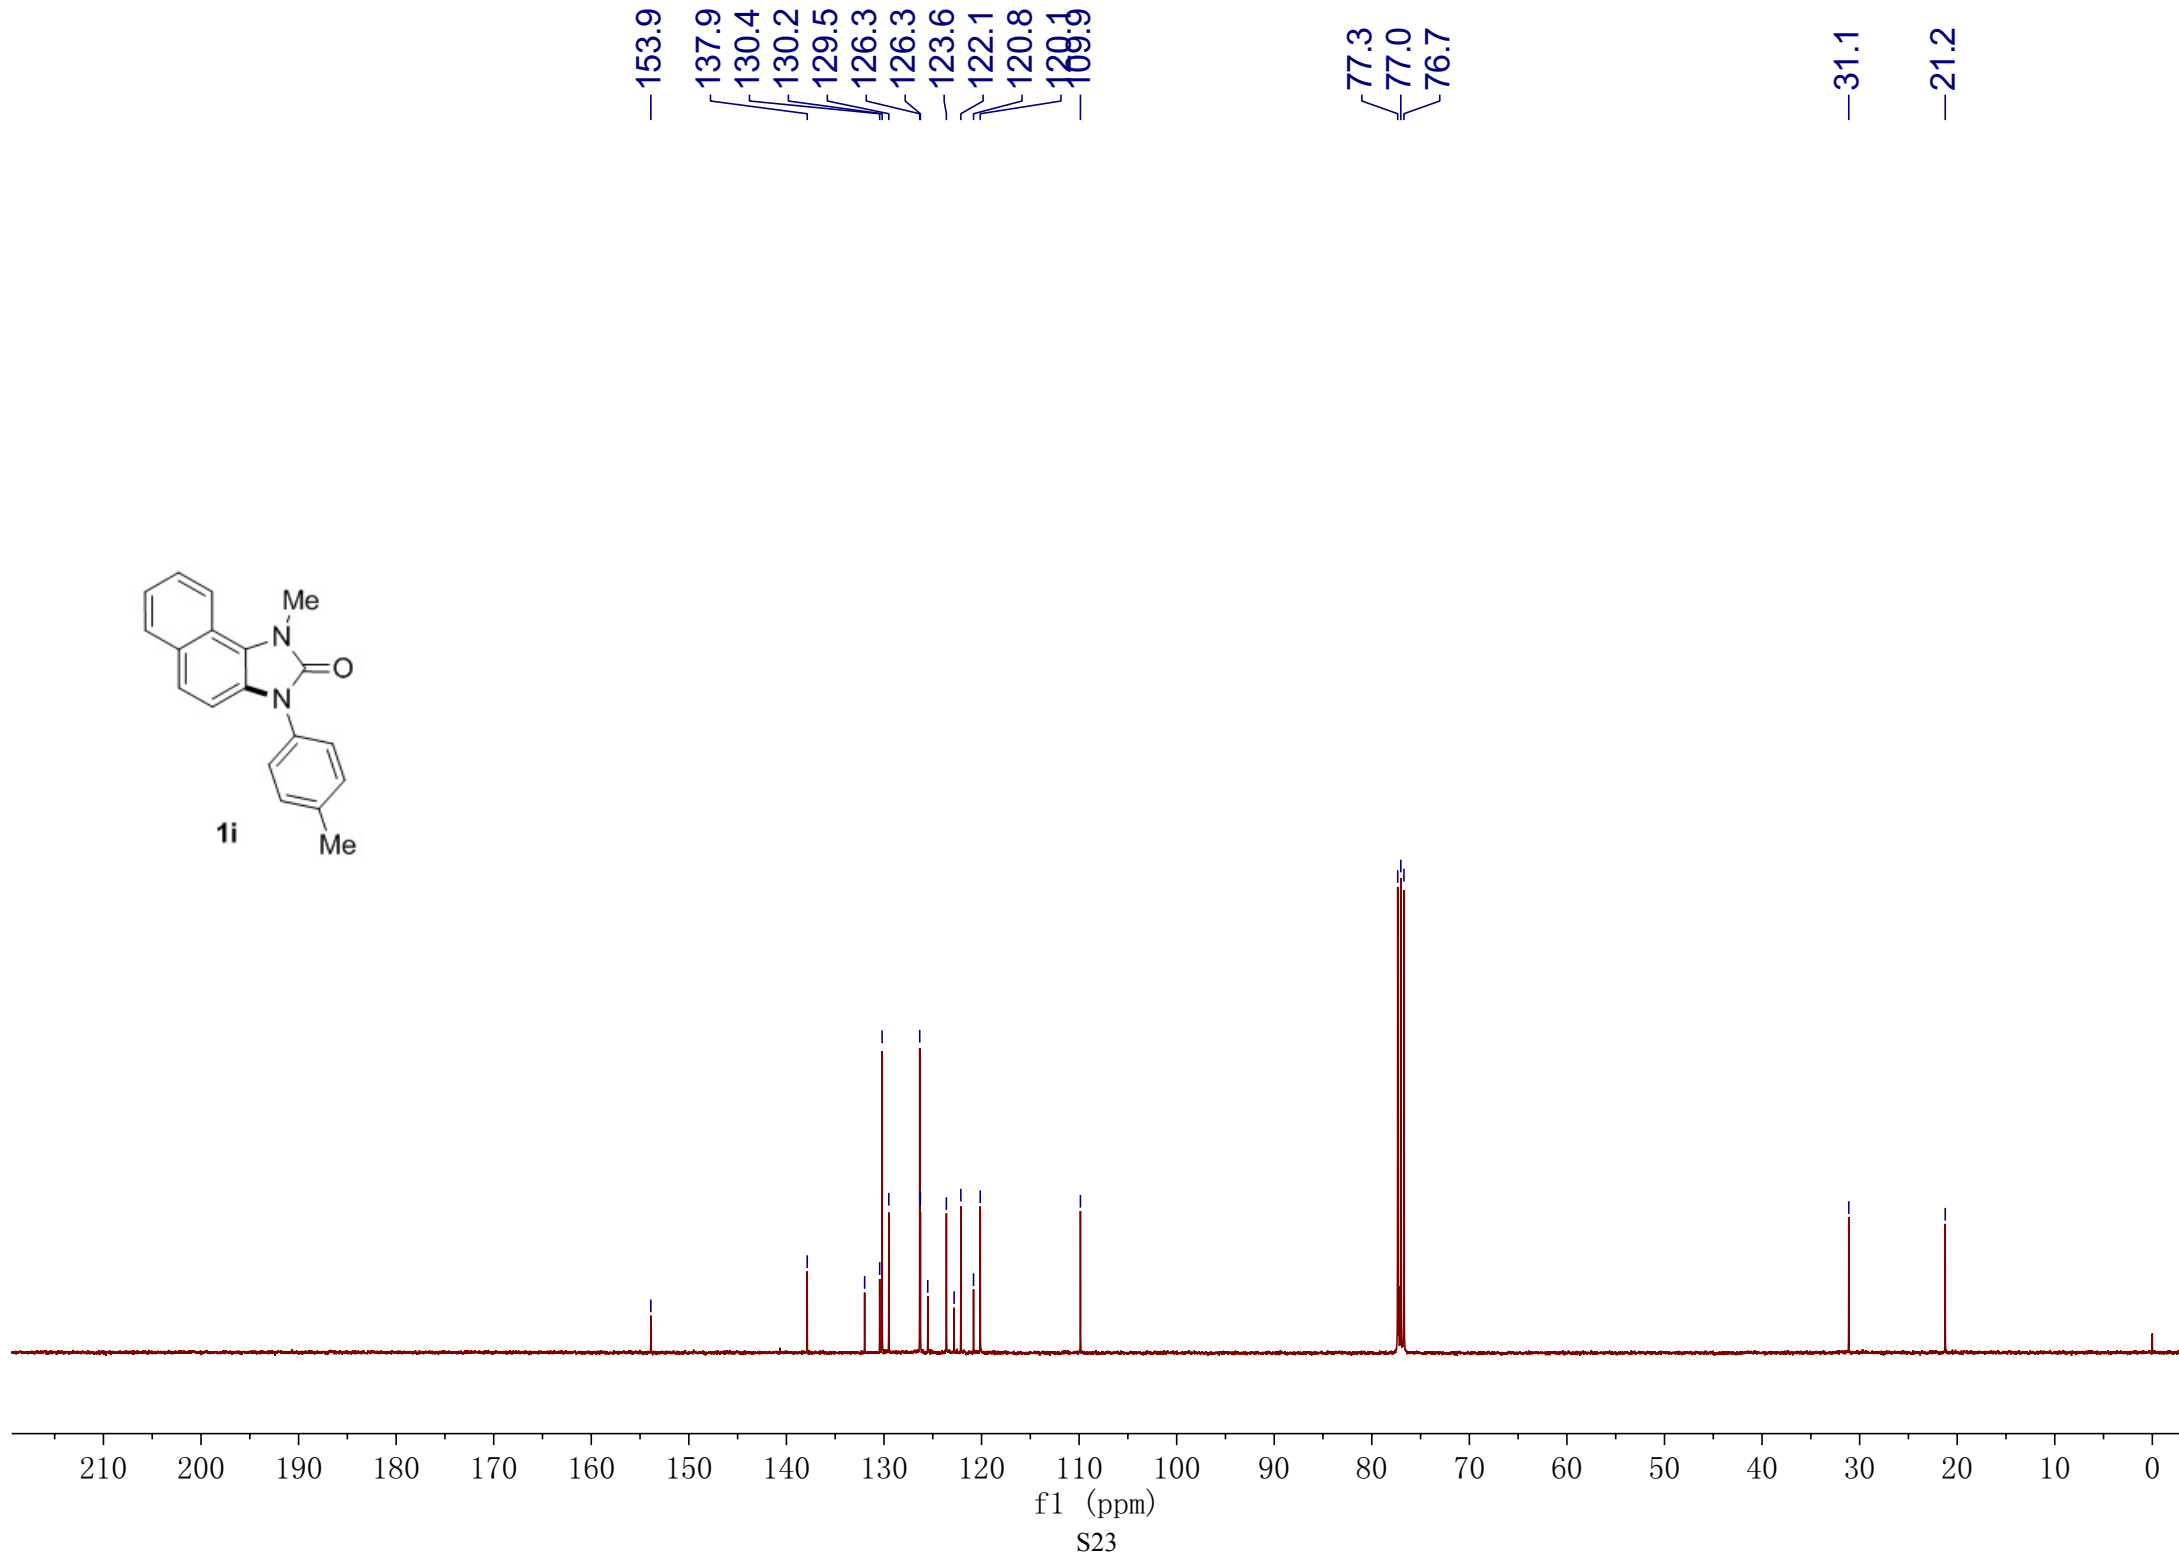

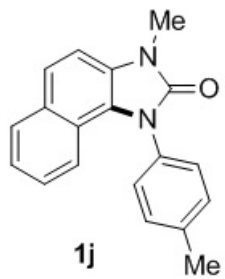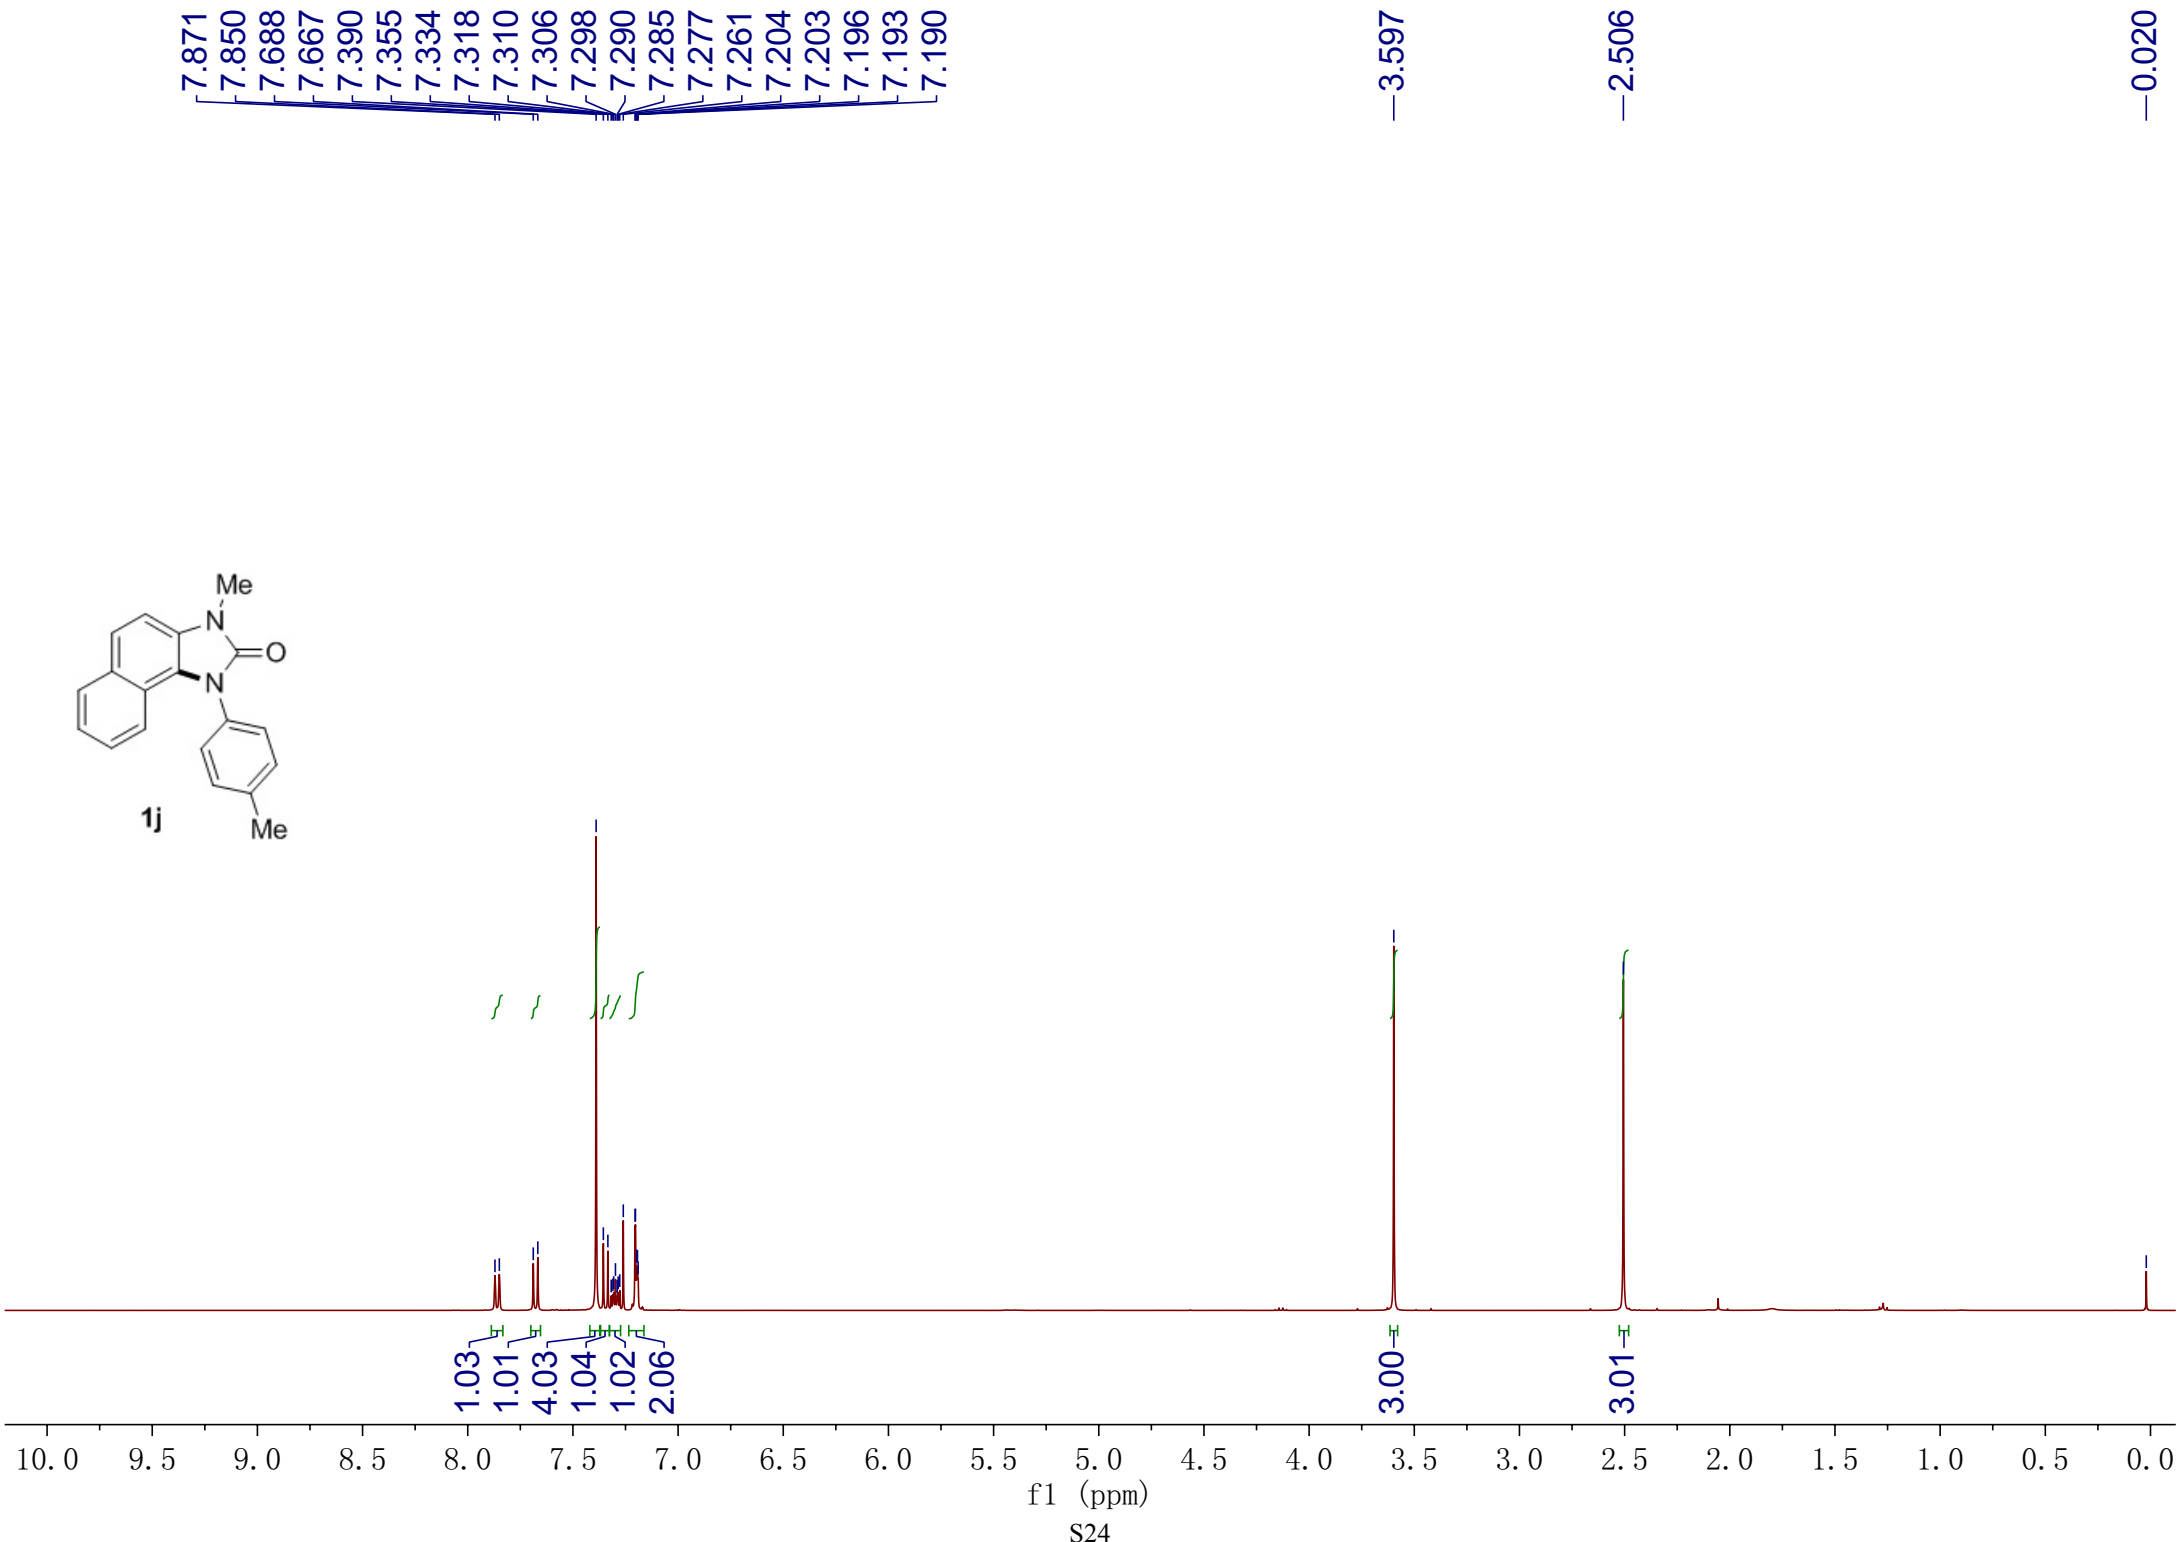

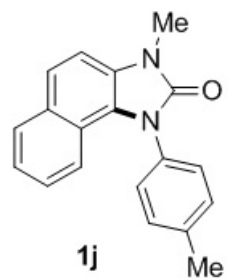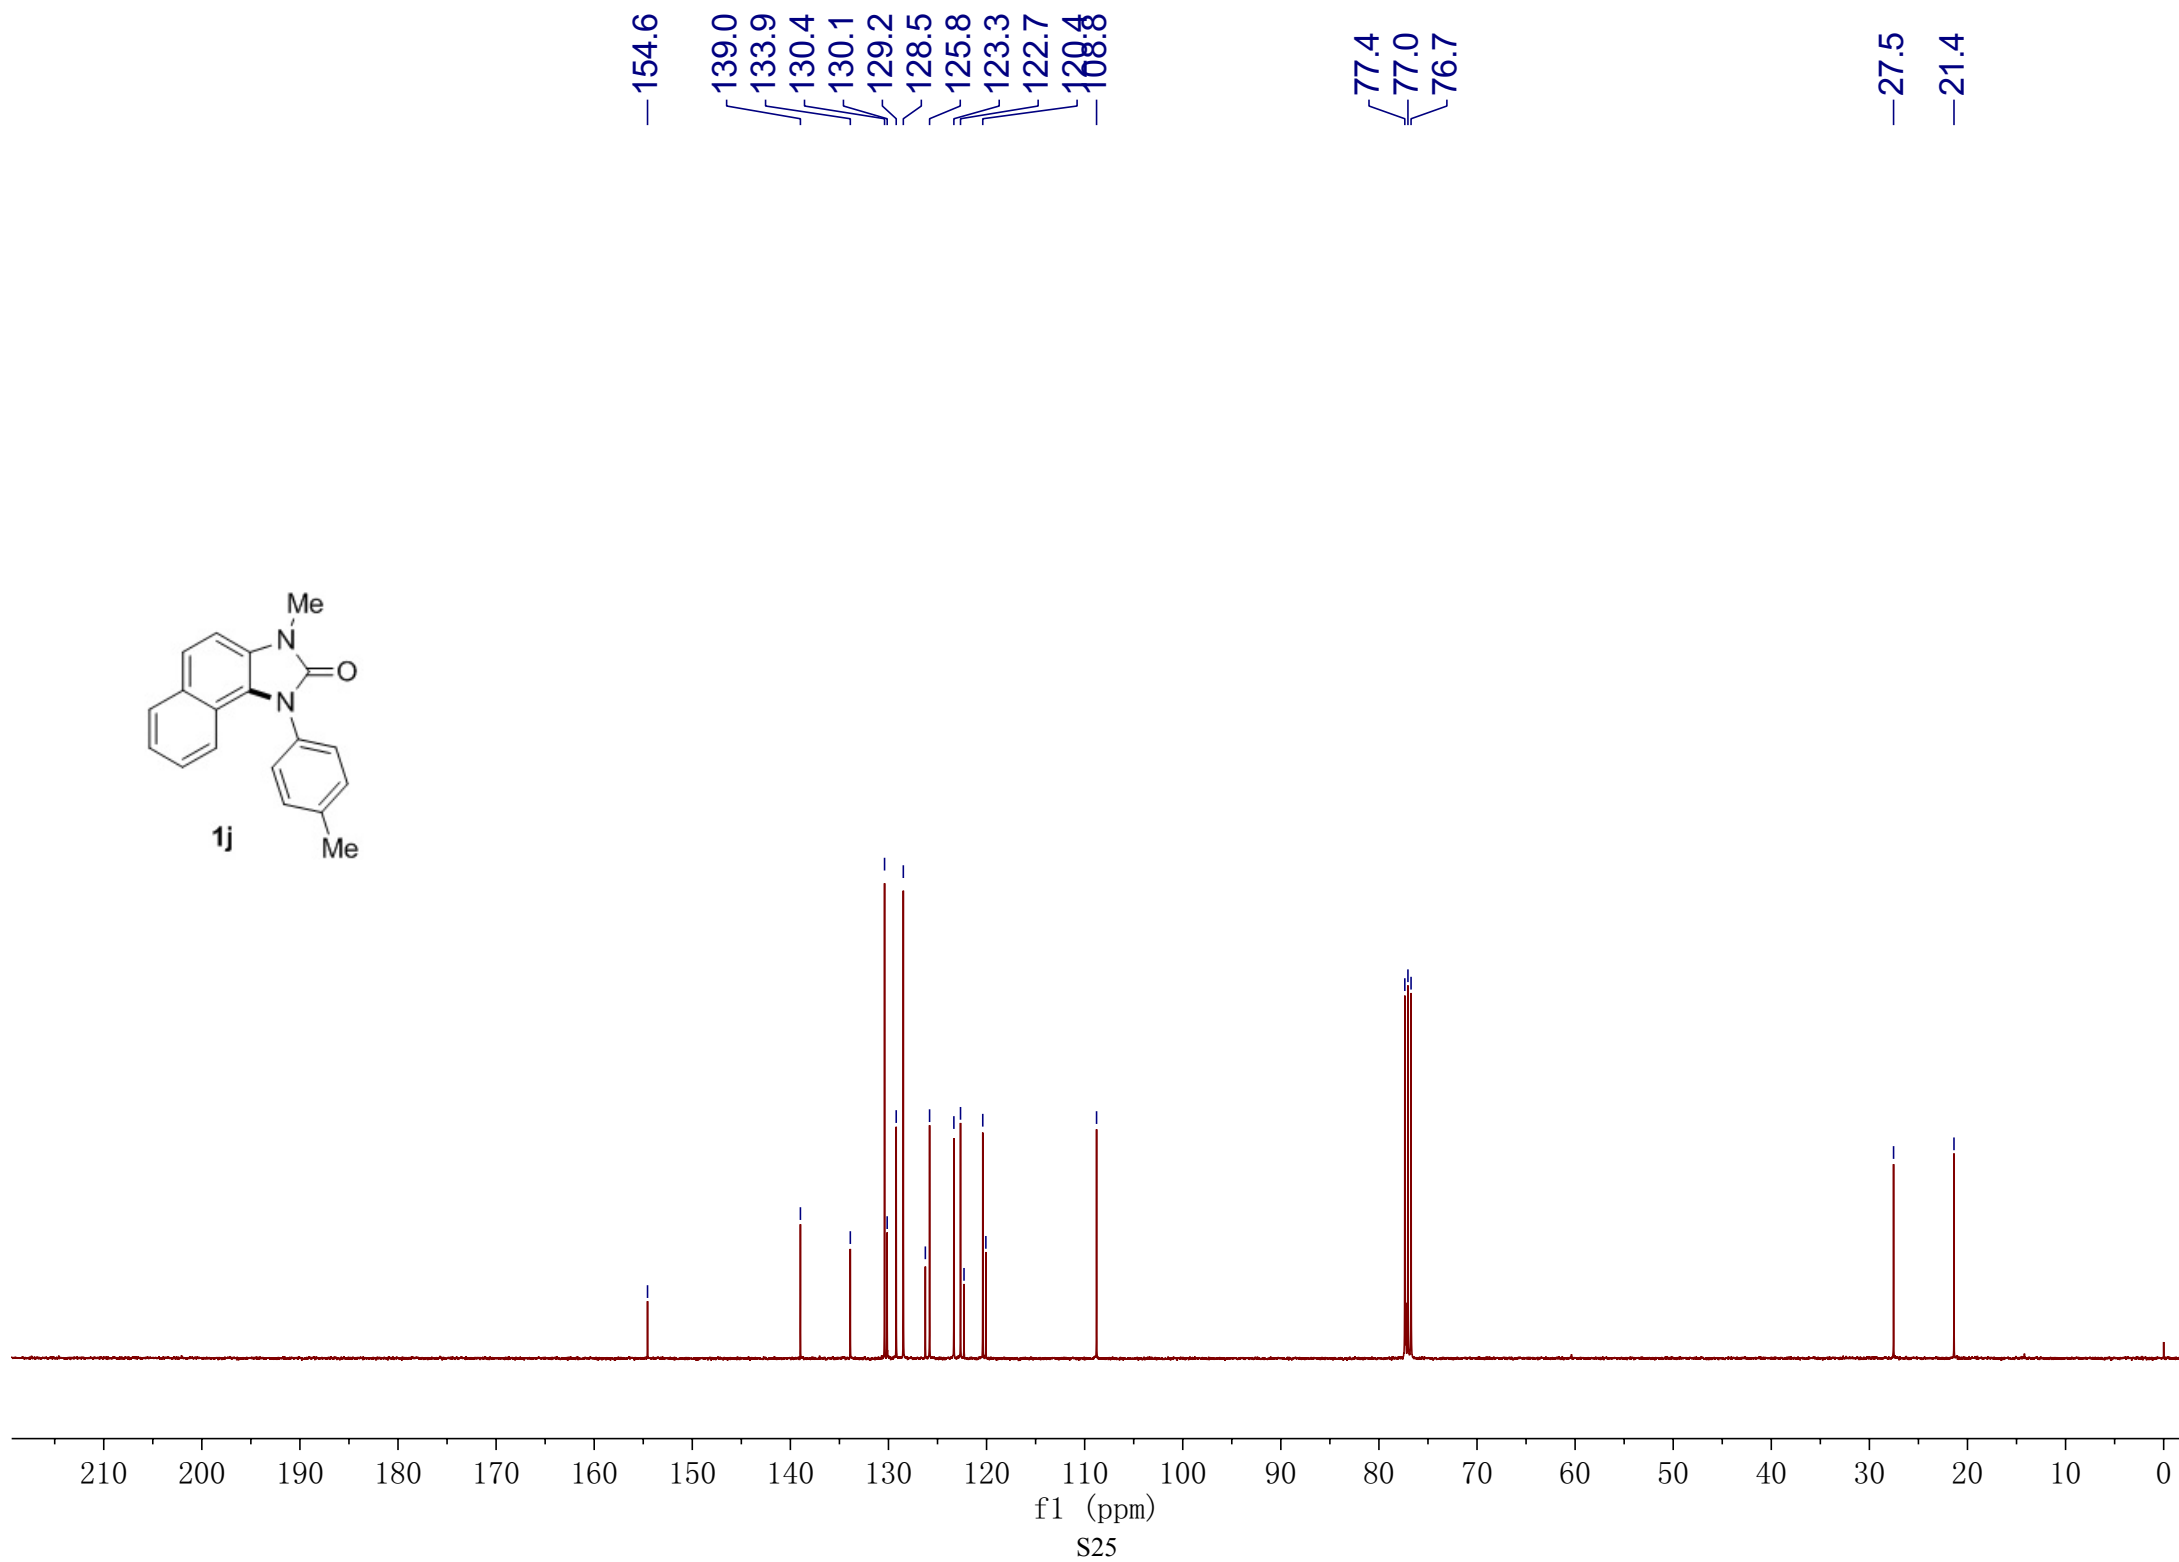

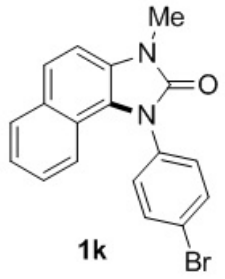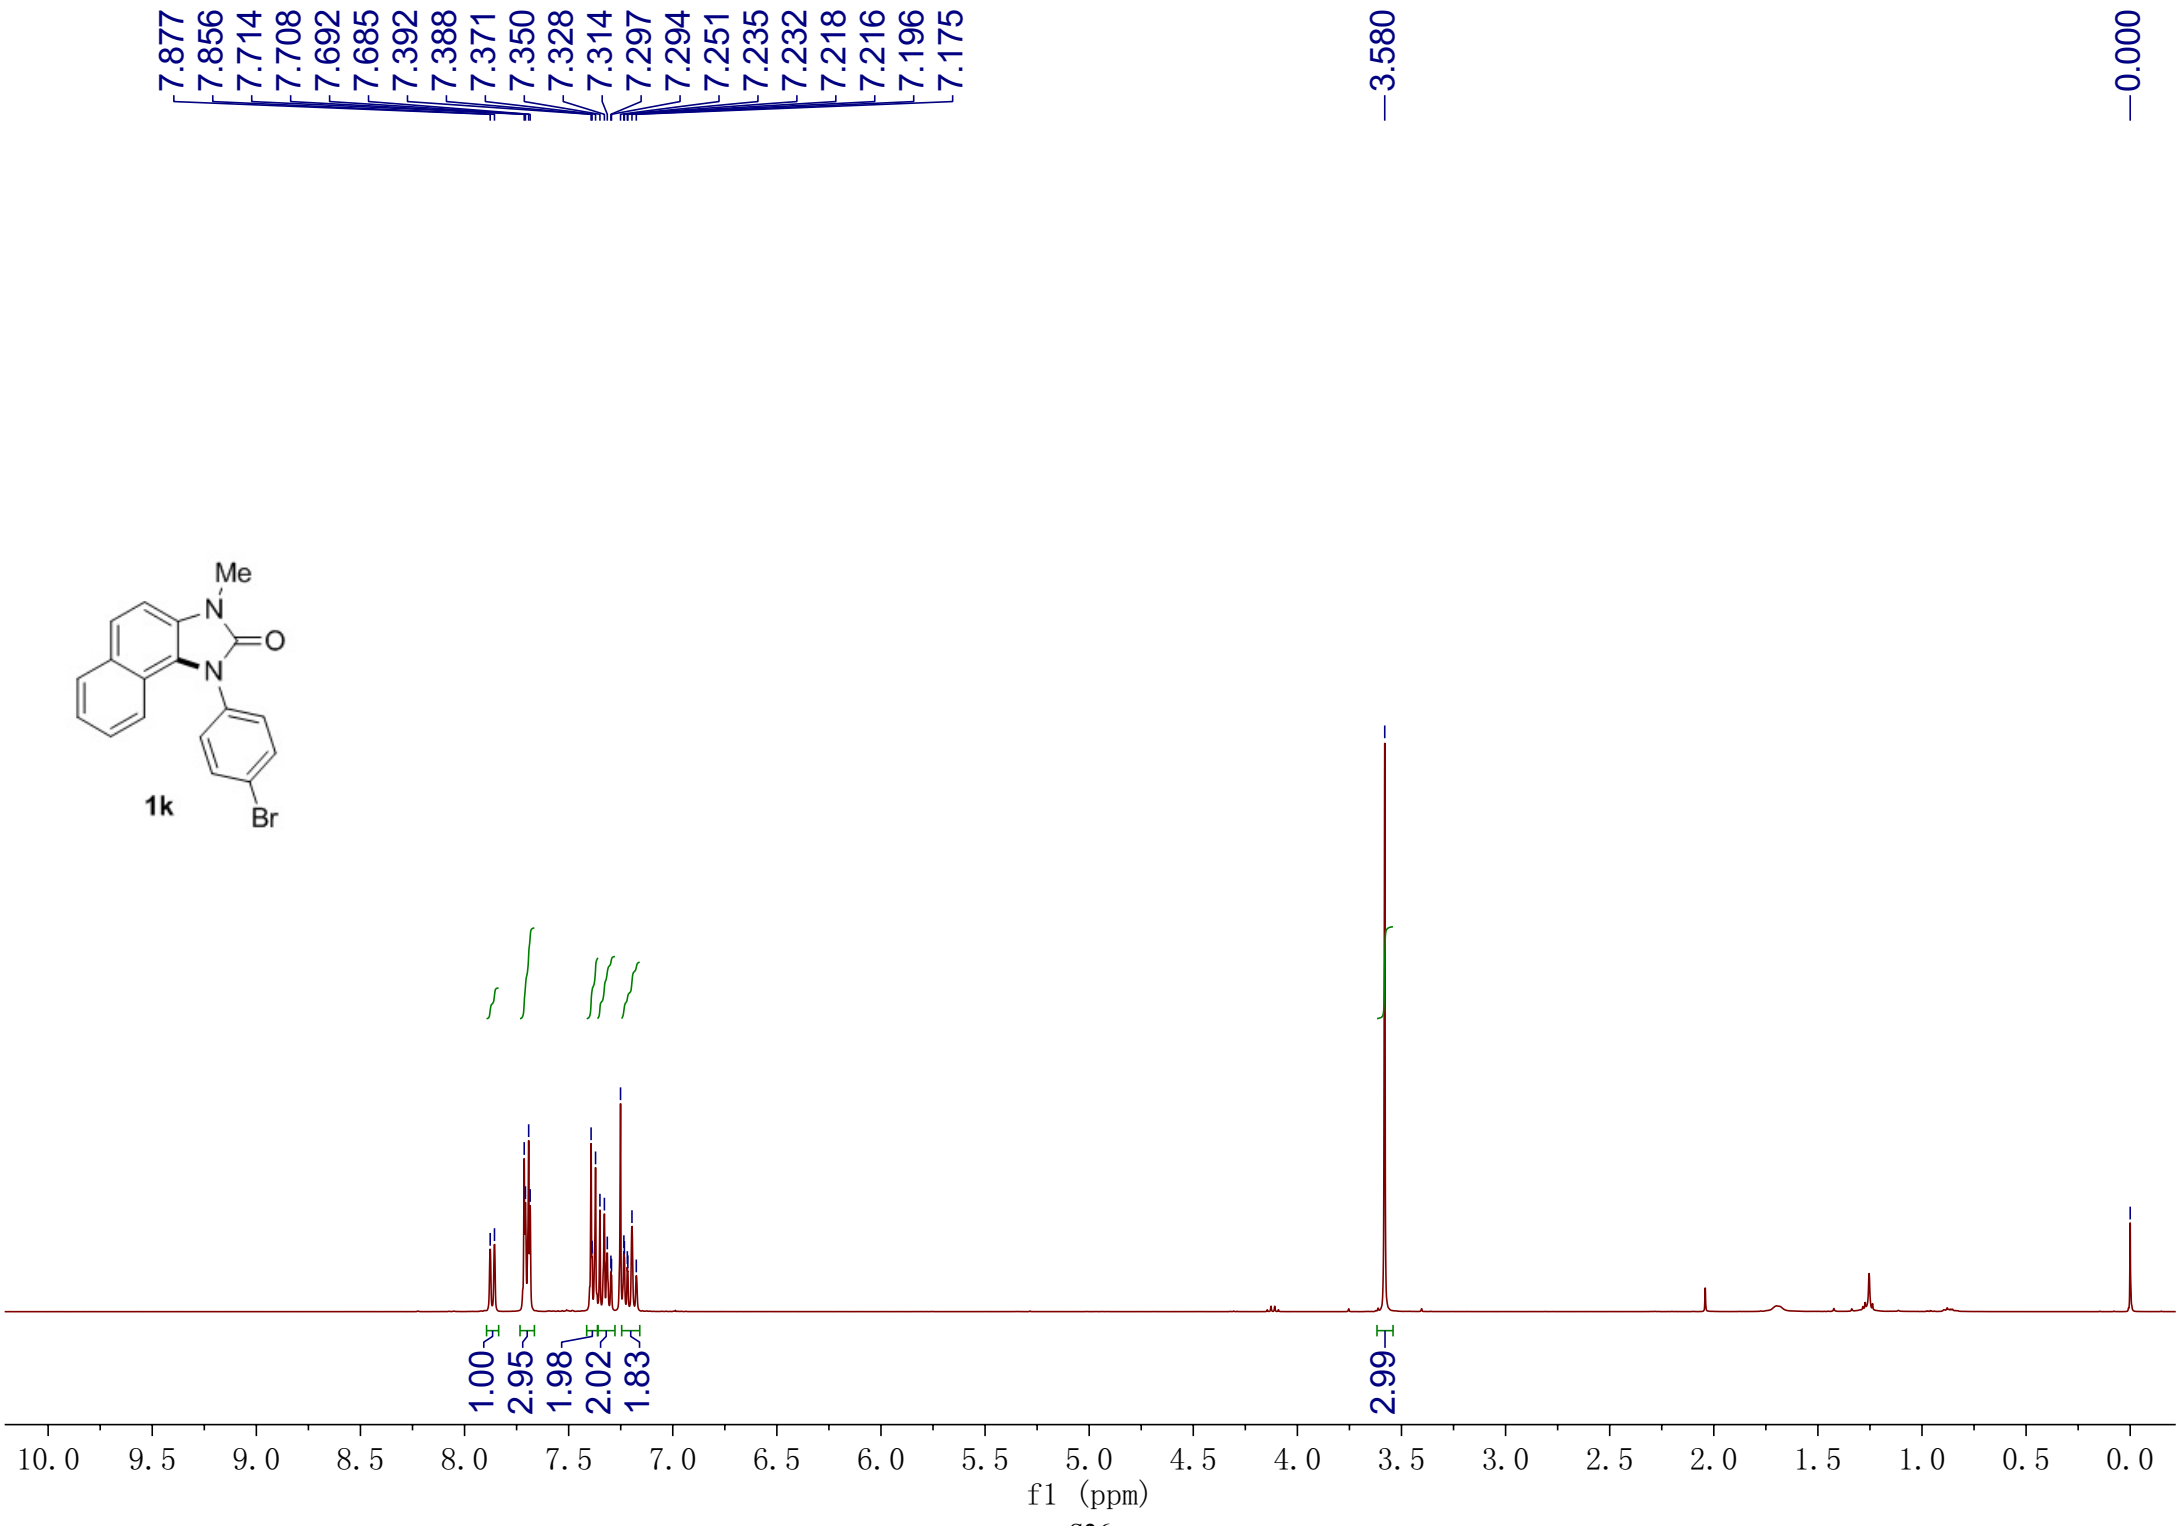

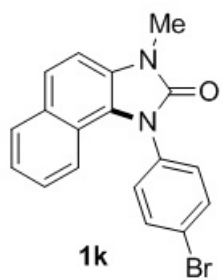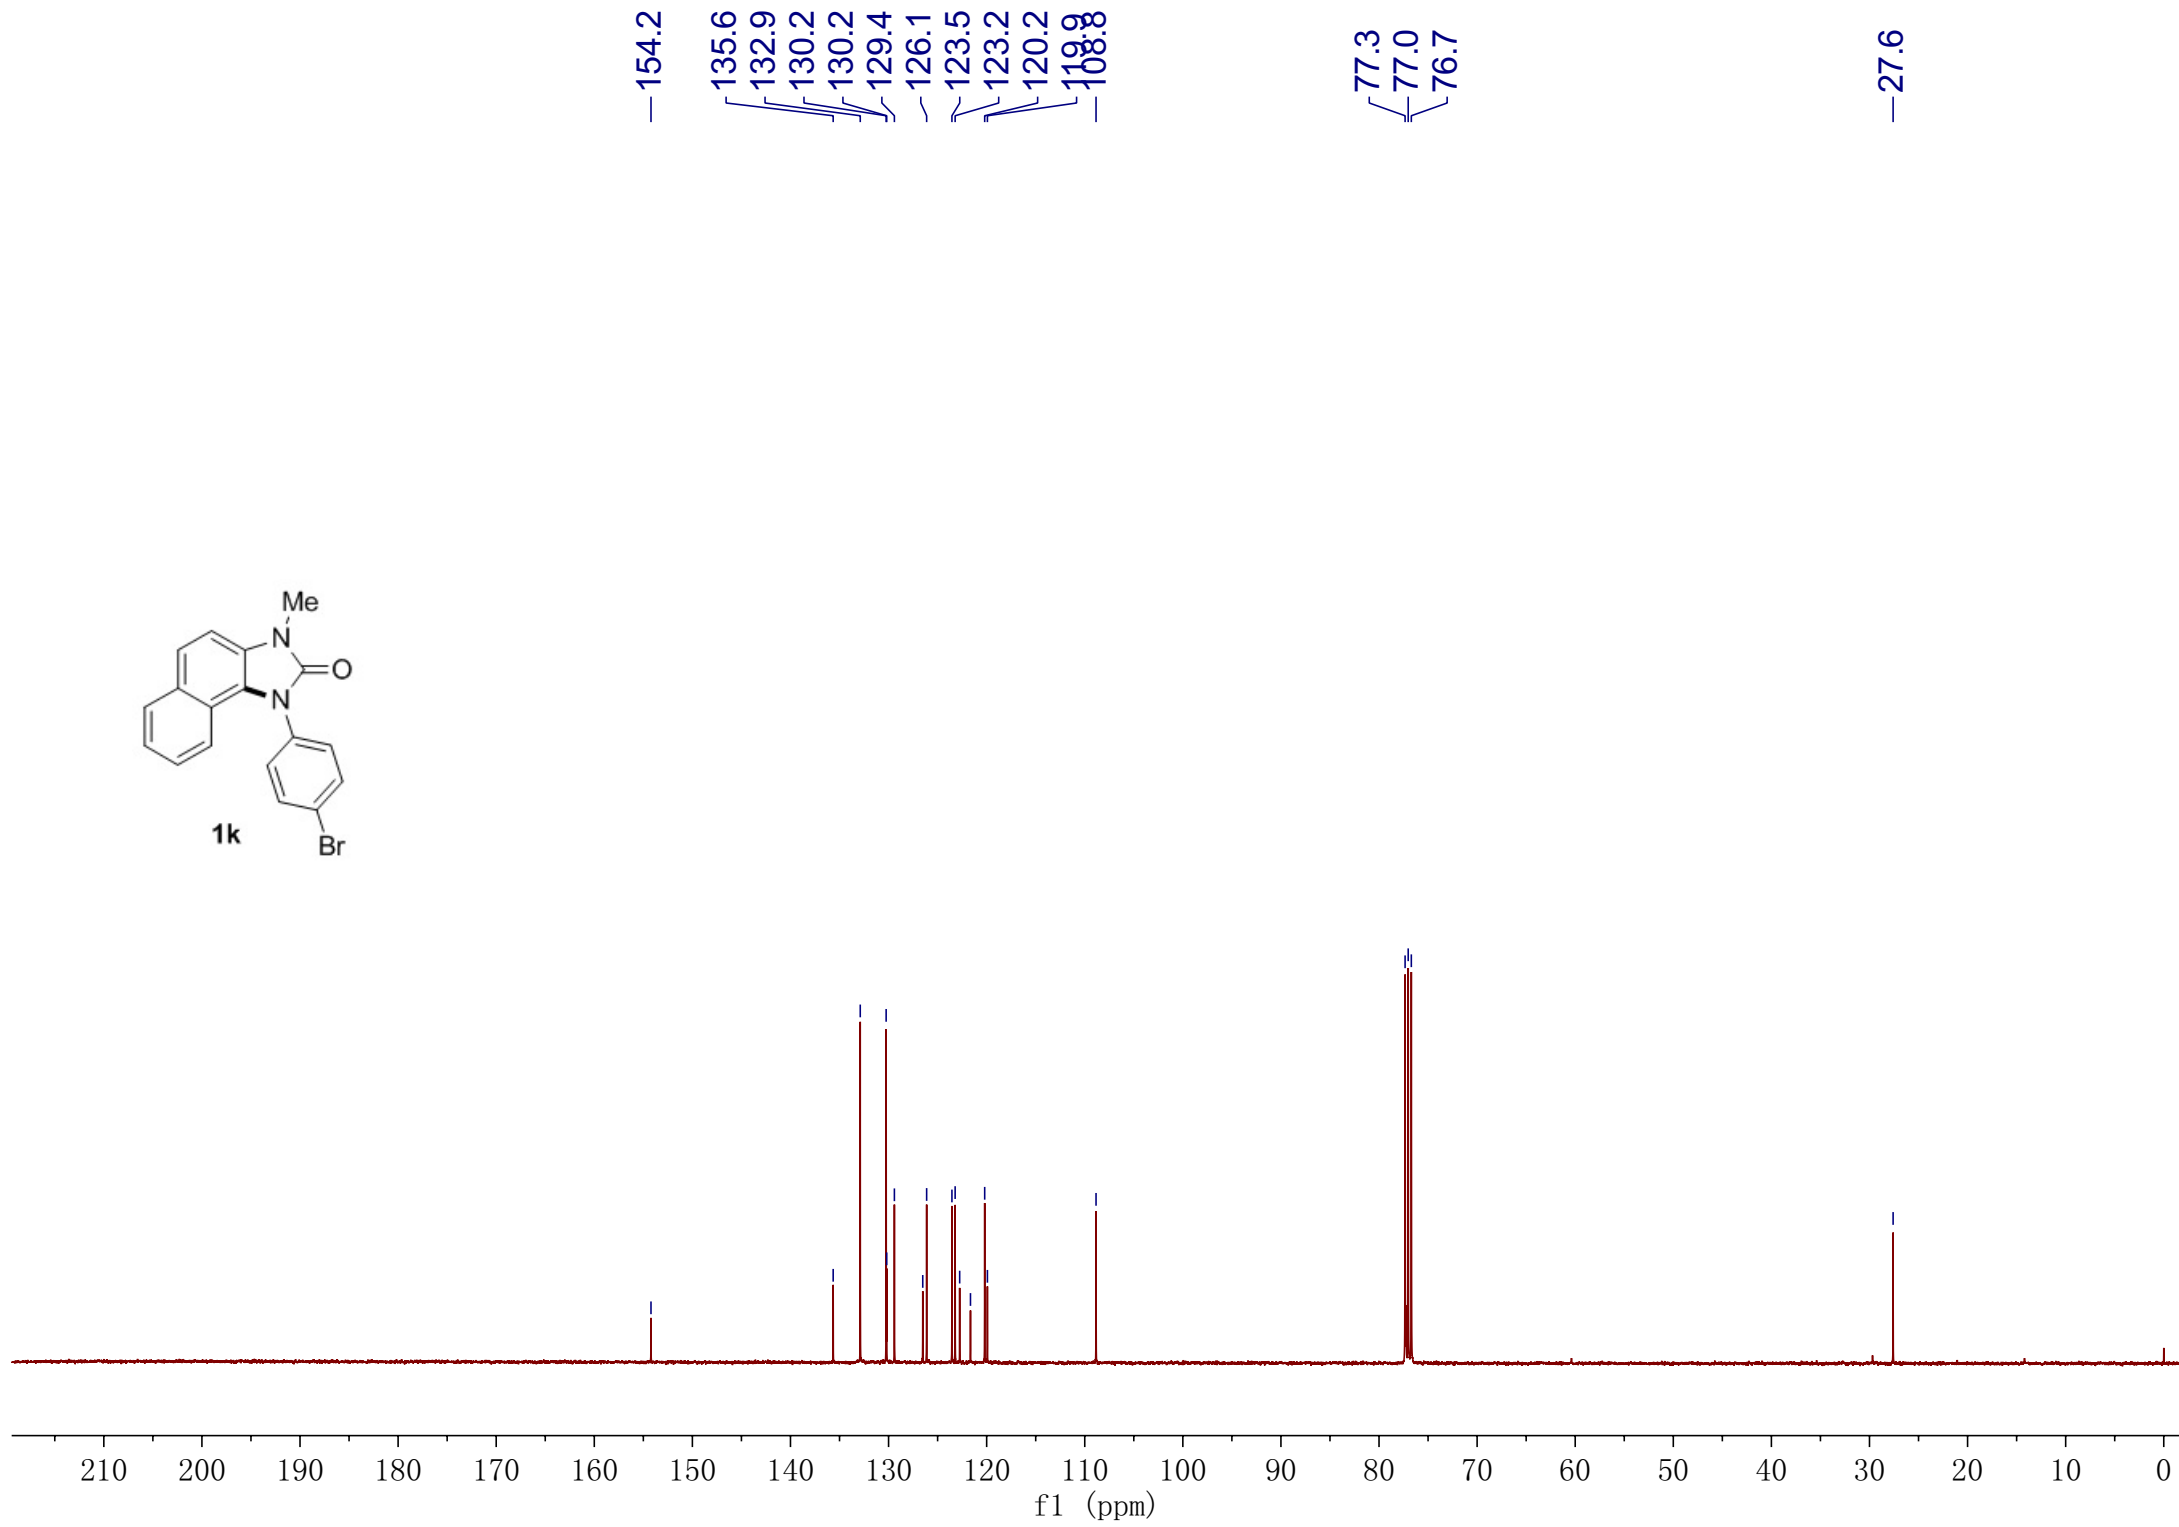

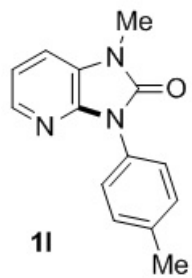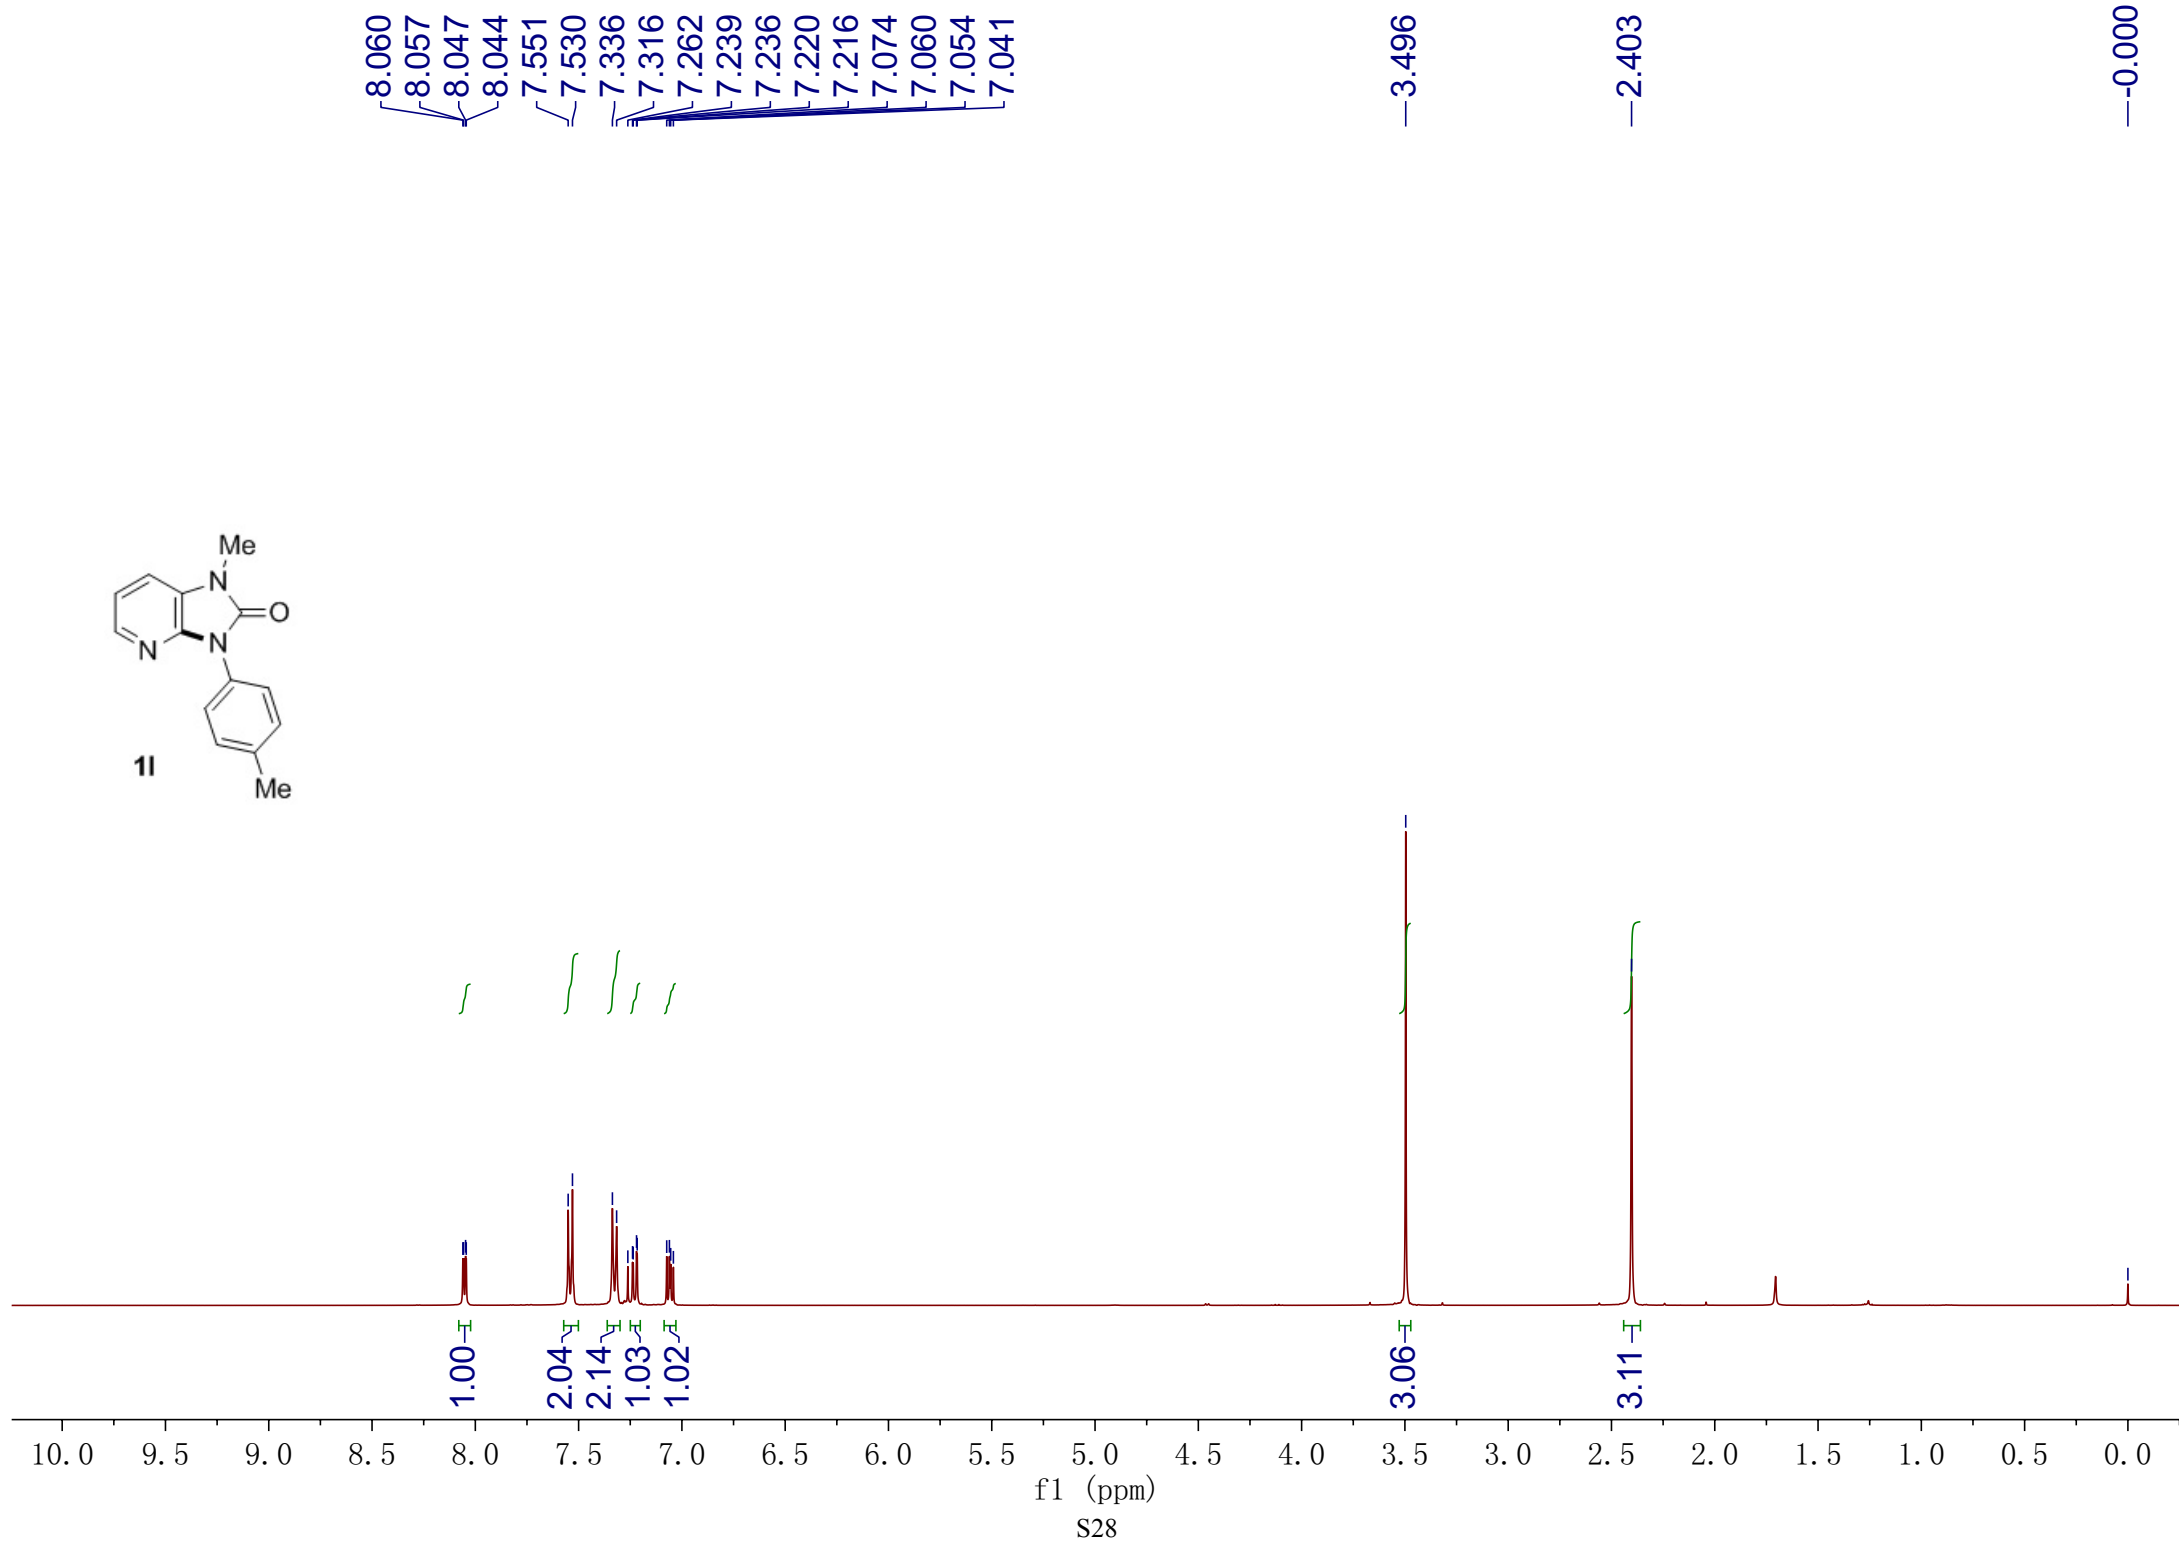



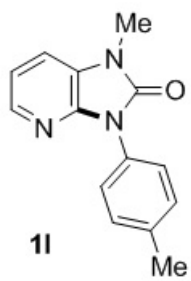

— 153.1  
~ 143.5  
~ 140.9  
~ 137.7  
~ 130.6  
~ 129.9  
~ 125.9  
~ 124.4  
~ 117.5  
~ 113.5

77.4  
77.1  
76.7

— 27.0  
— 21.2

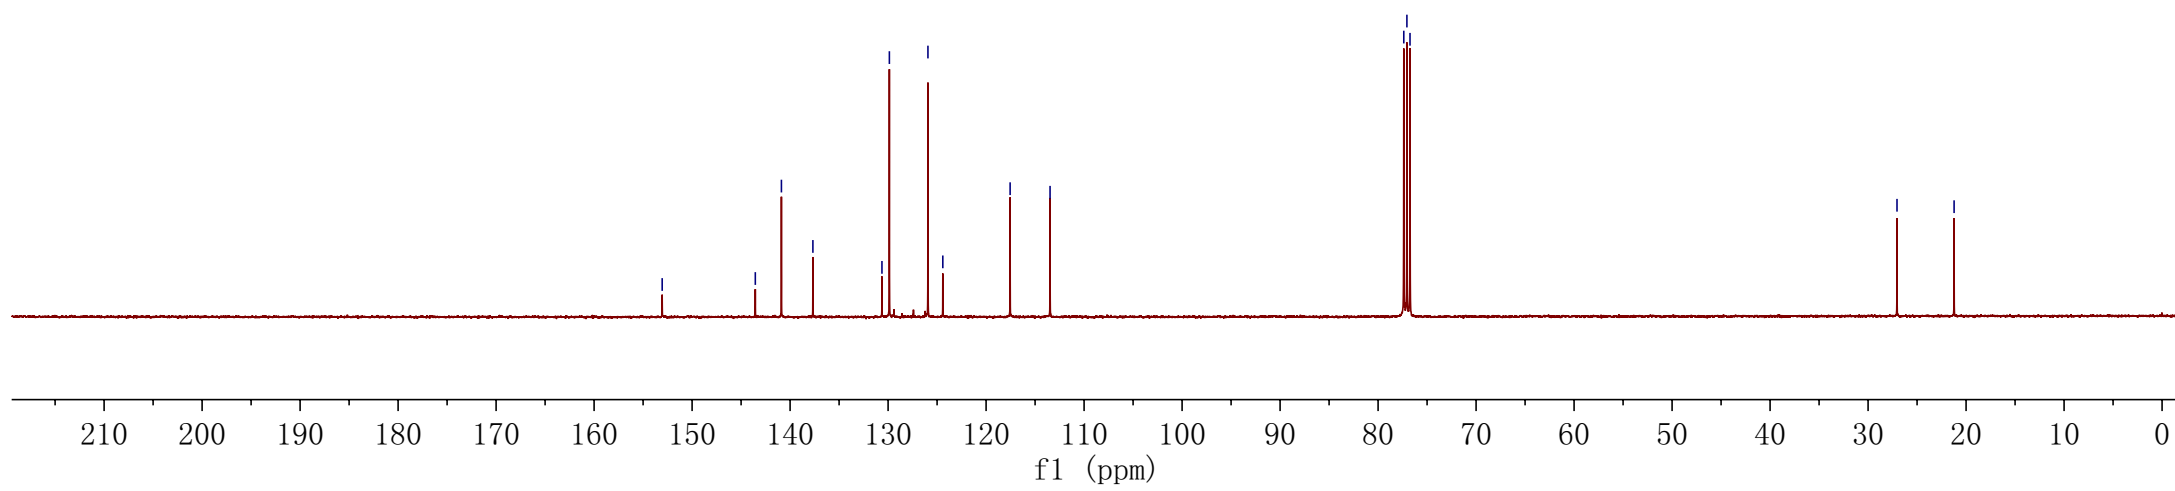

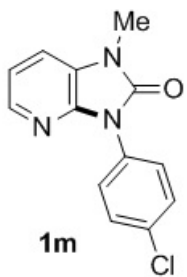

8.064  
8.061  
8.051  
8.048  
7.726  
7.708  
7.704  
7.487  
7.466  
7.273  
7.252  
7.250  
7.233  
7.230  
7.100  
7.087  
7.081  
7.068

—3.483

—0.000

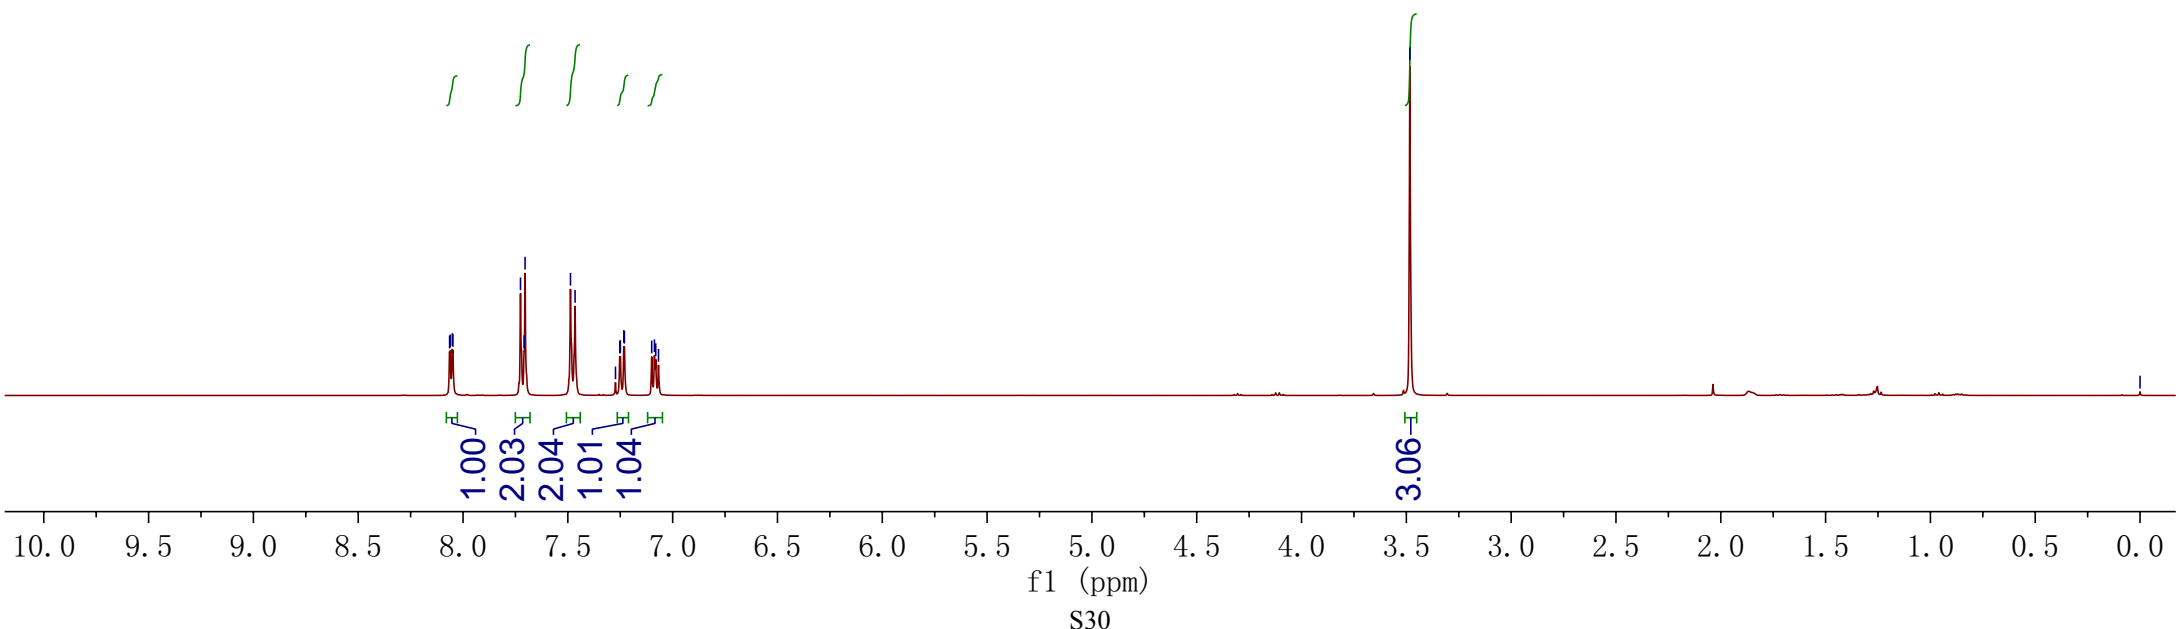

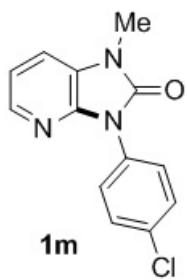

152.6  
142.9  
140.8  
133.0  
132.0  
129.3  
126.9  
124.4  
118.0  
113.8

77.5  
77.1  
76.8

27.1

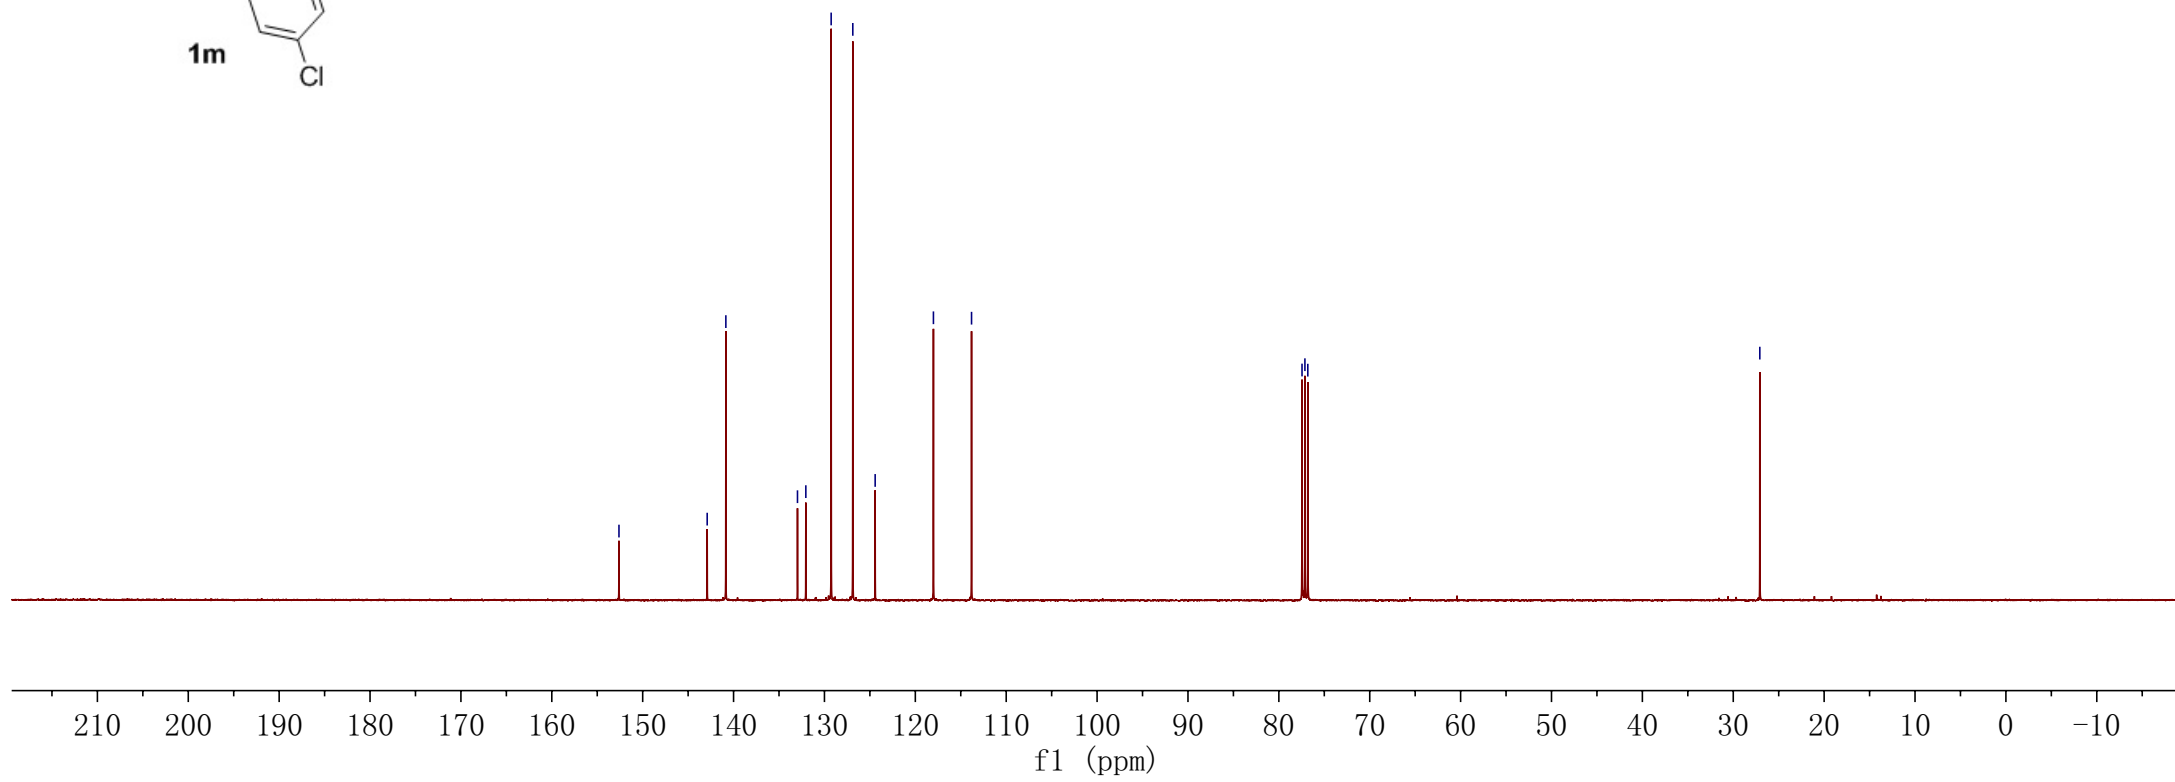

S31

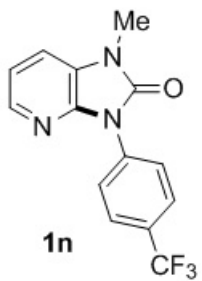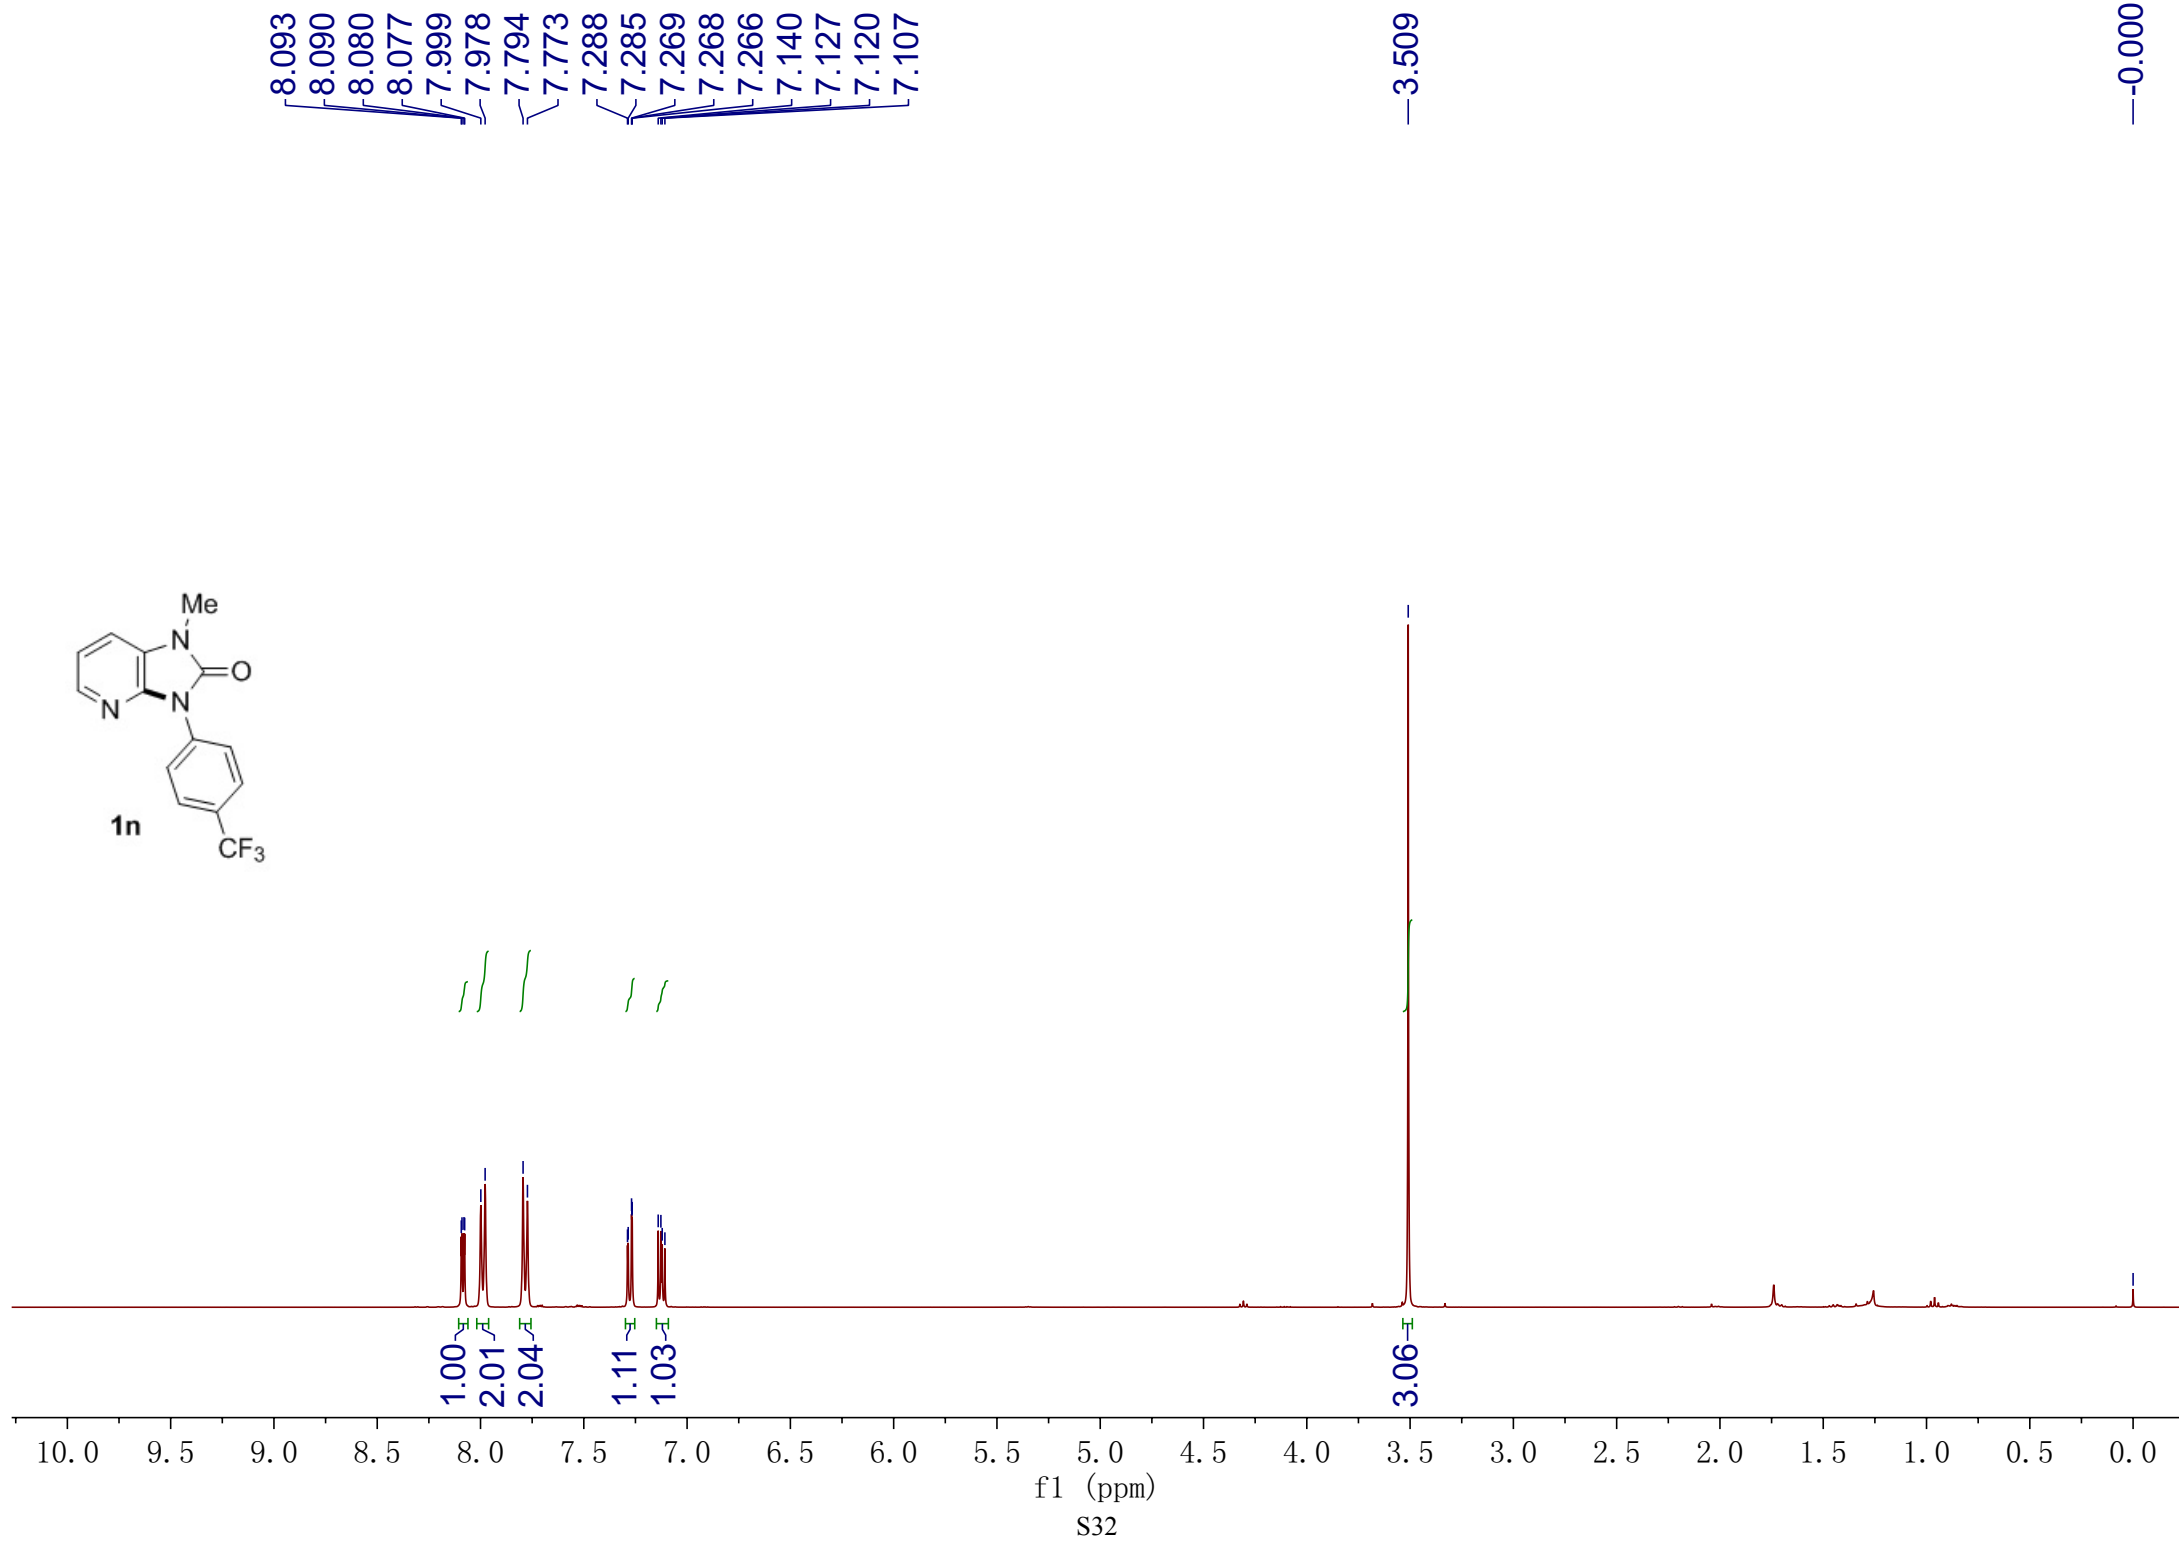

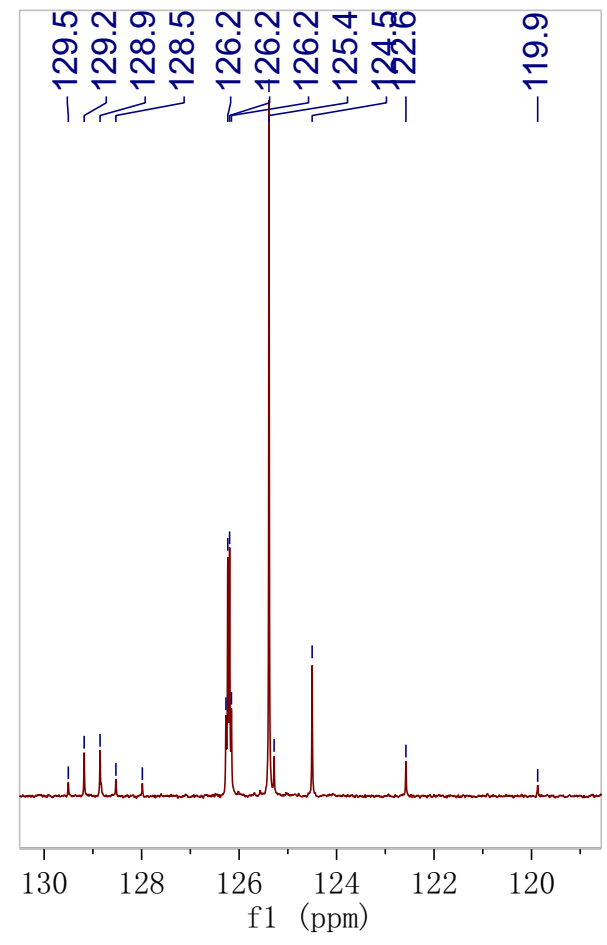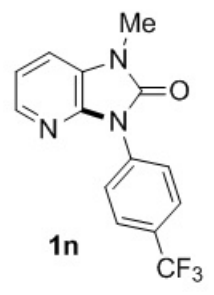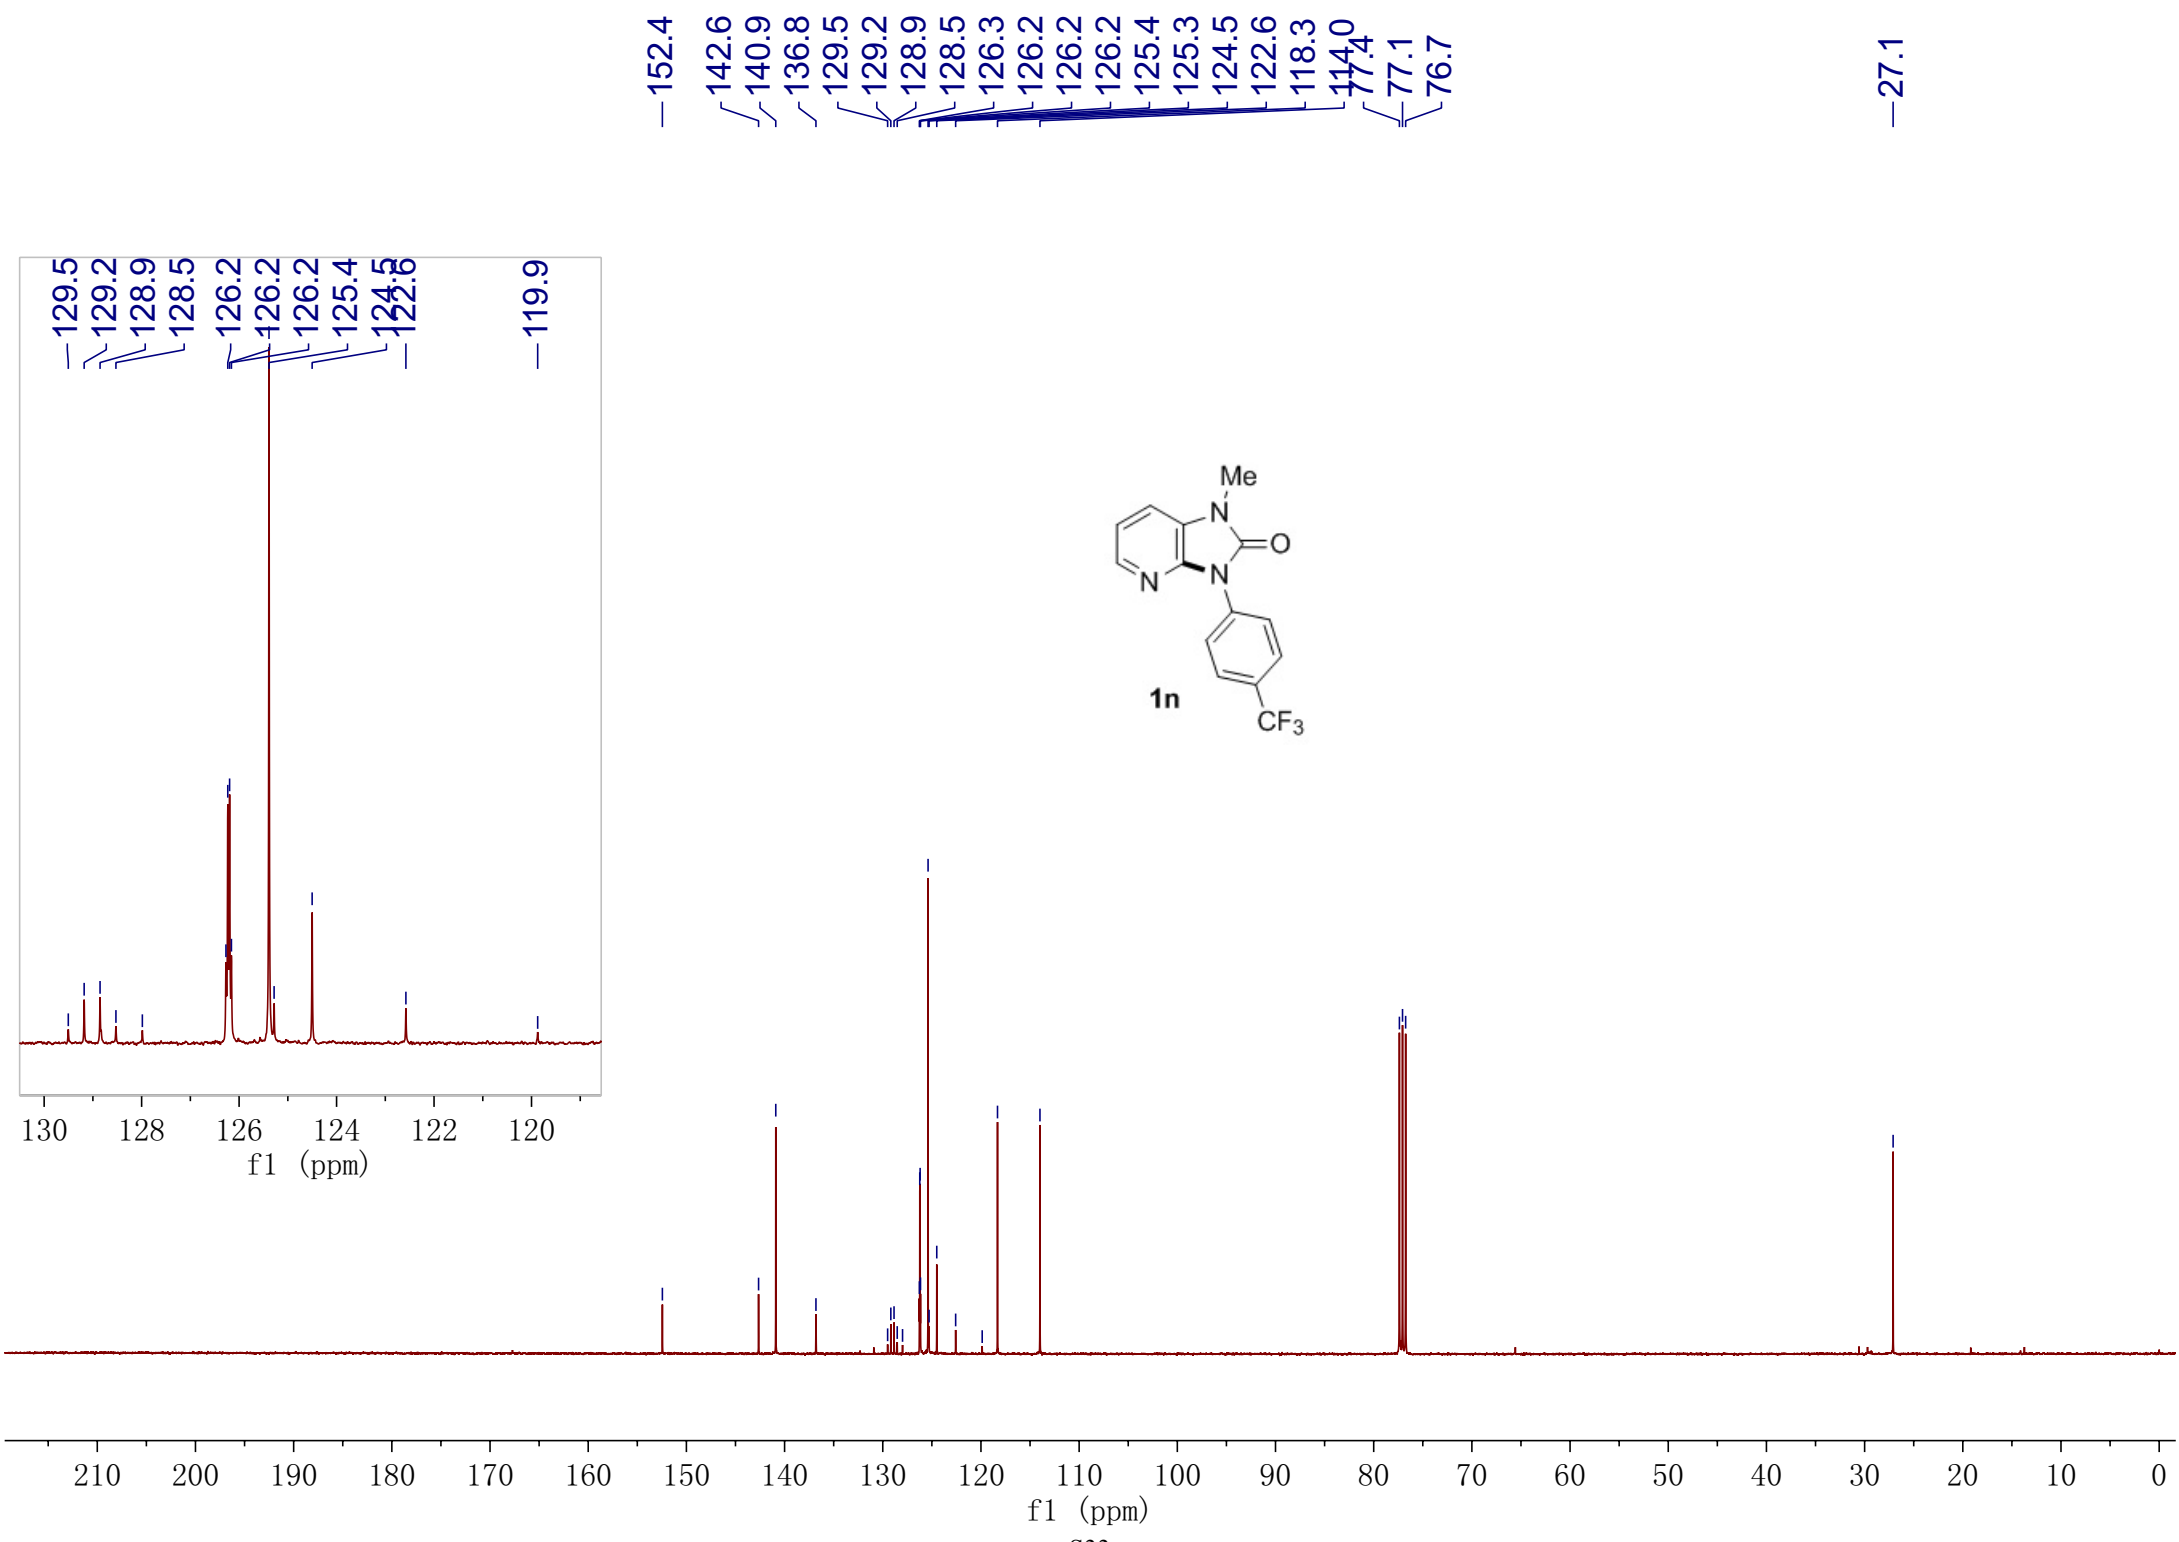

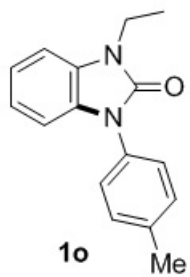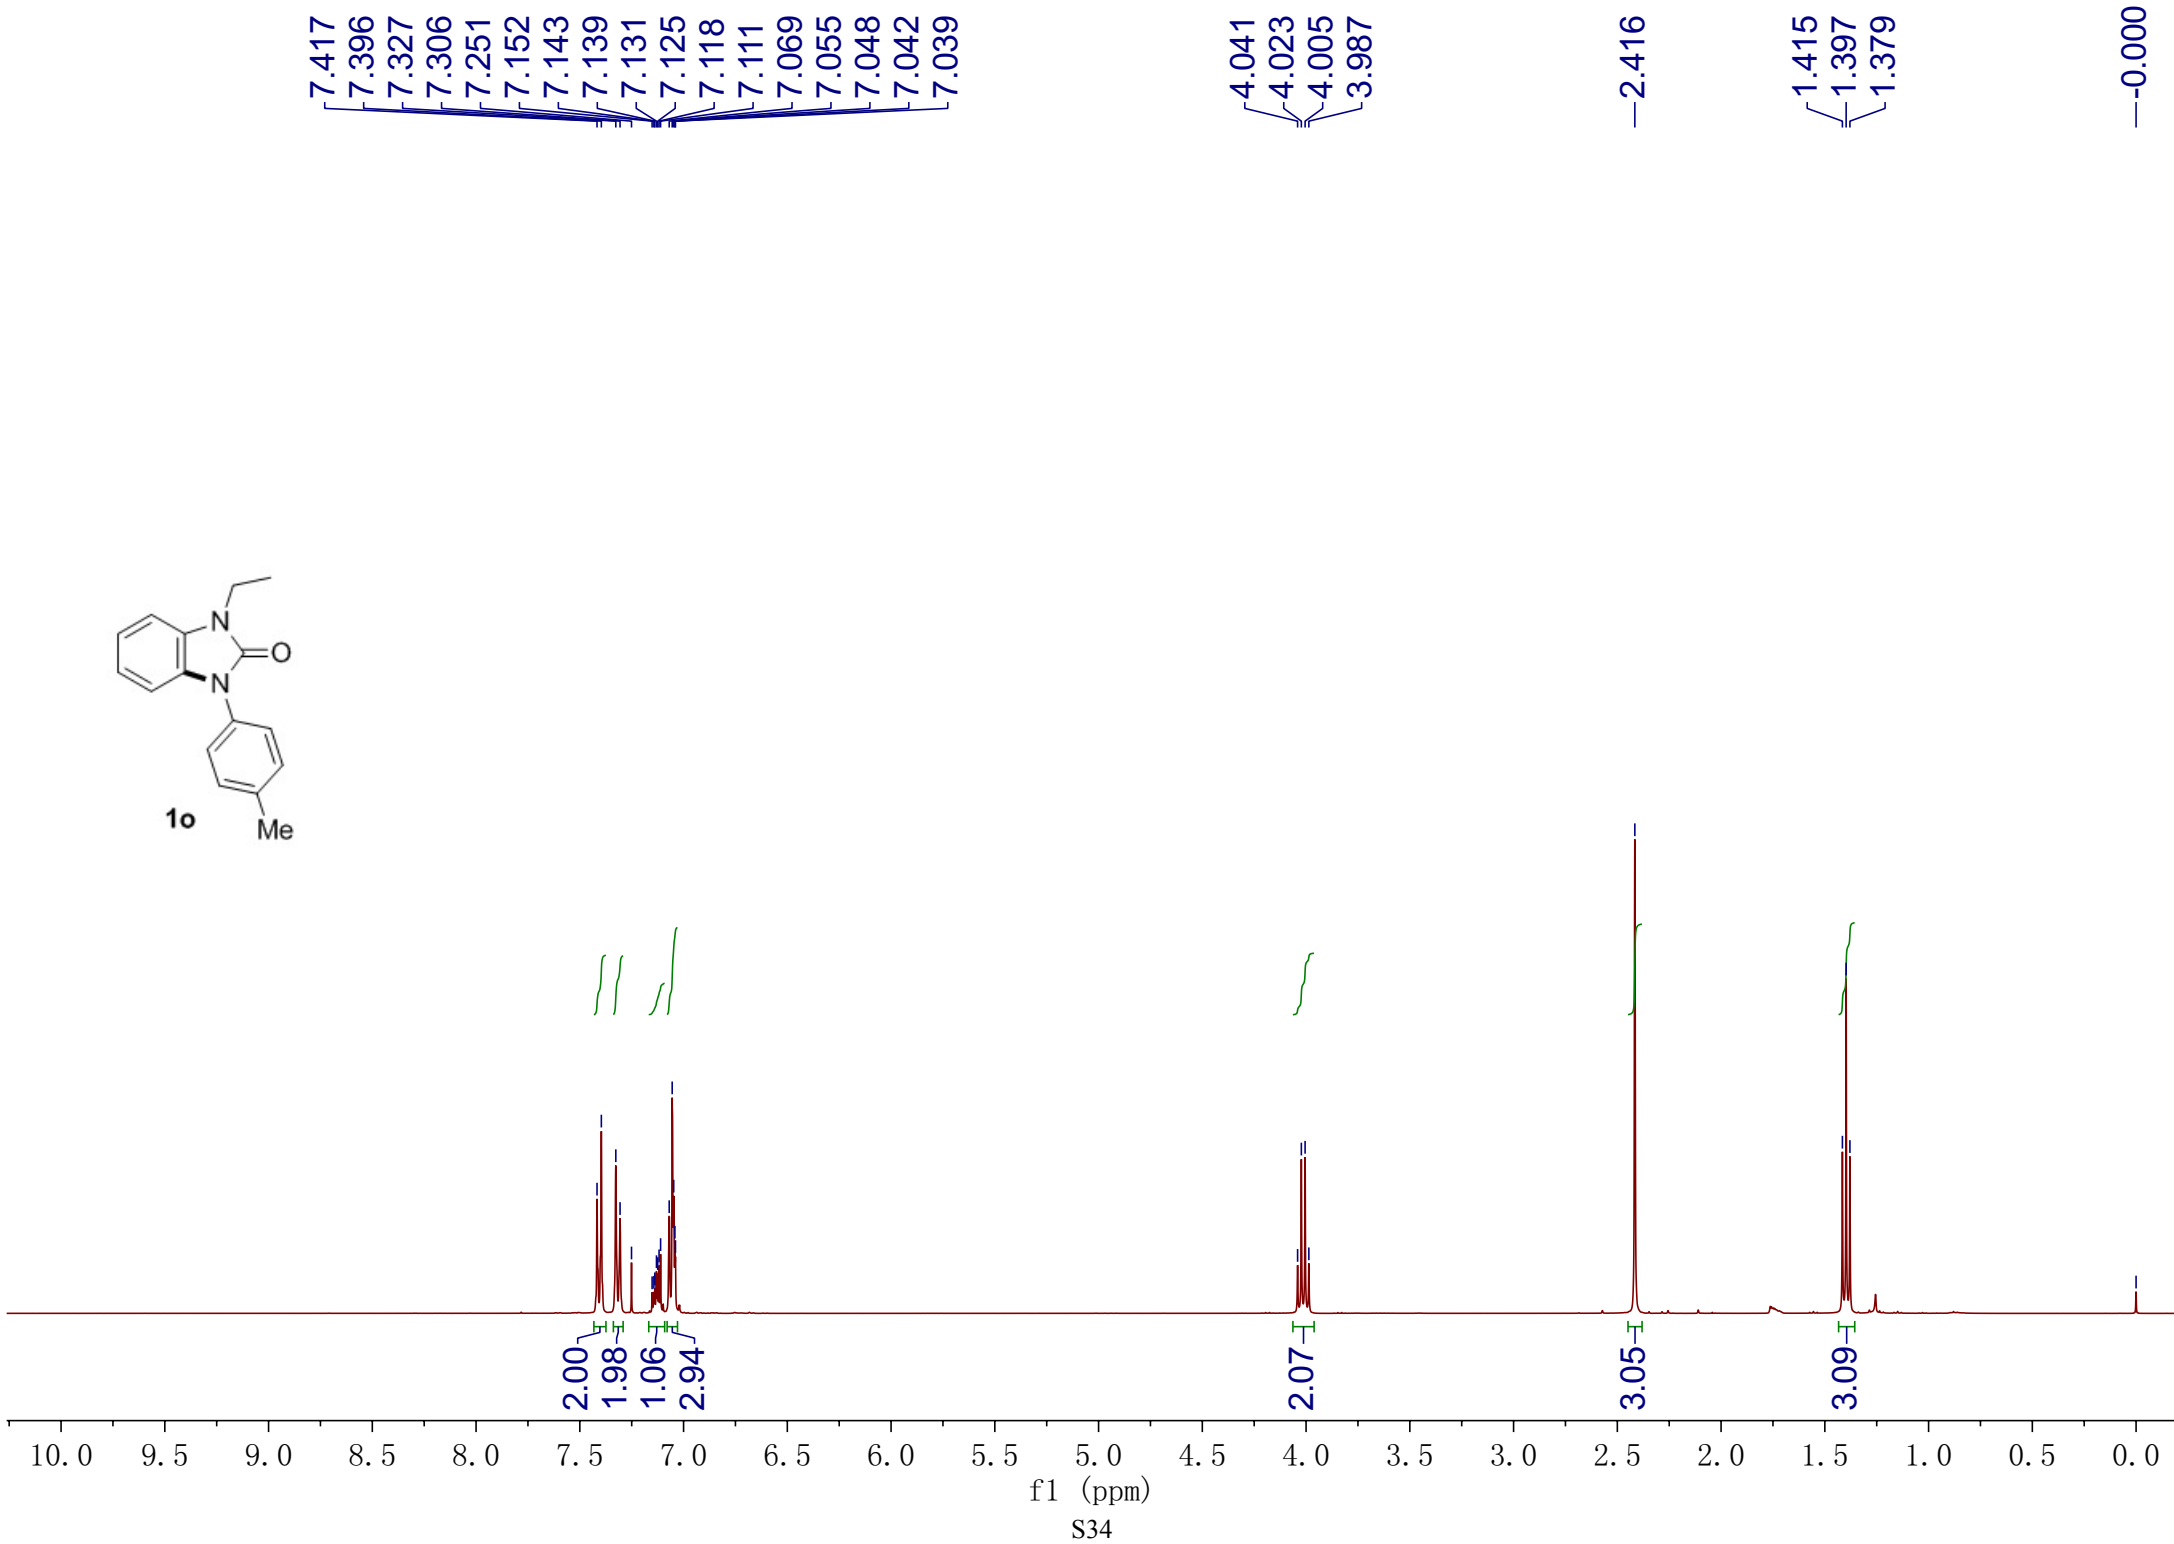

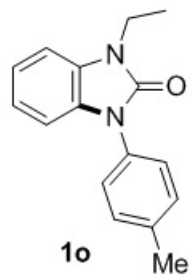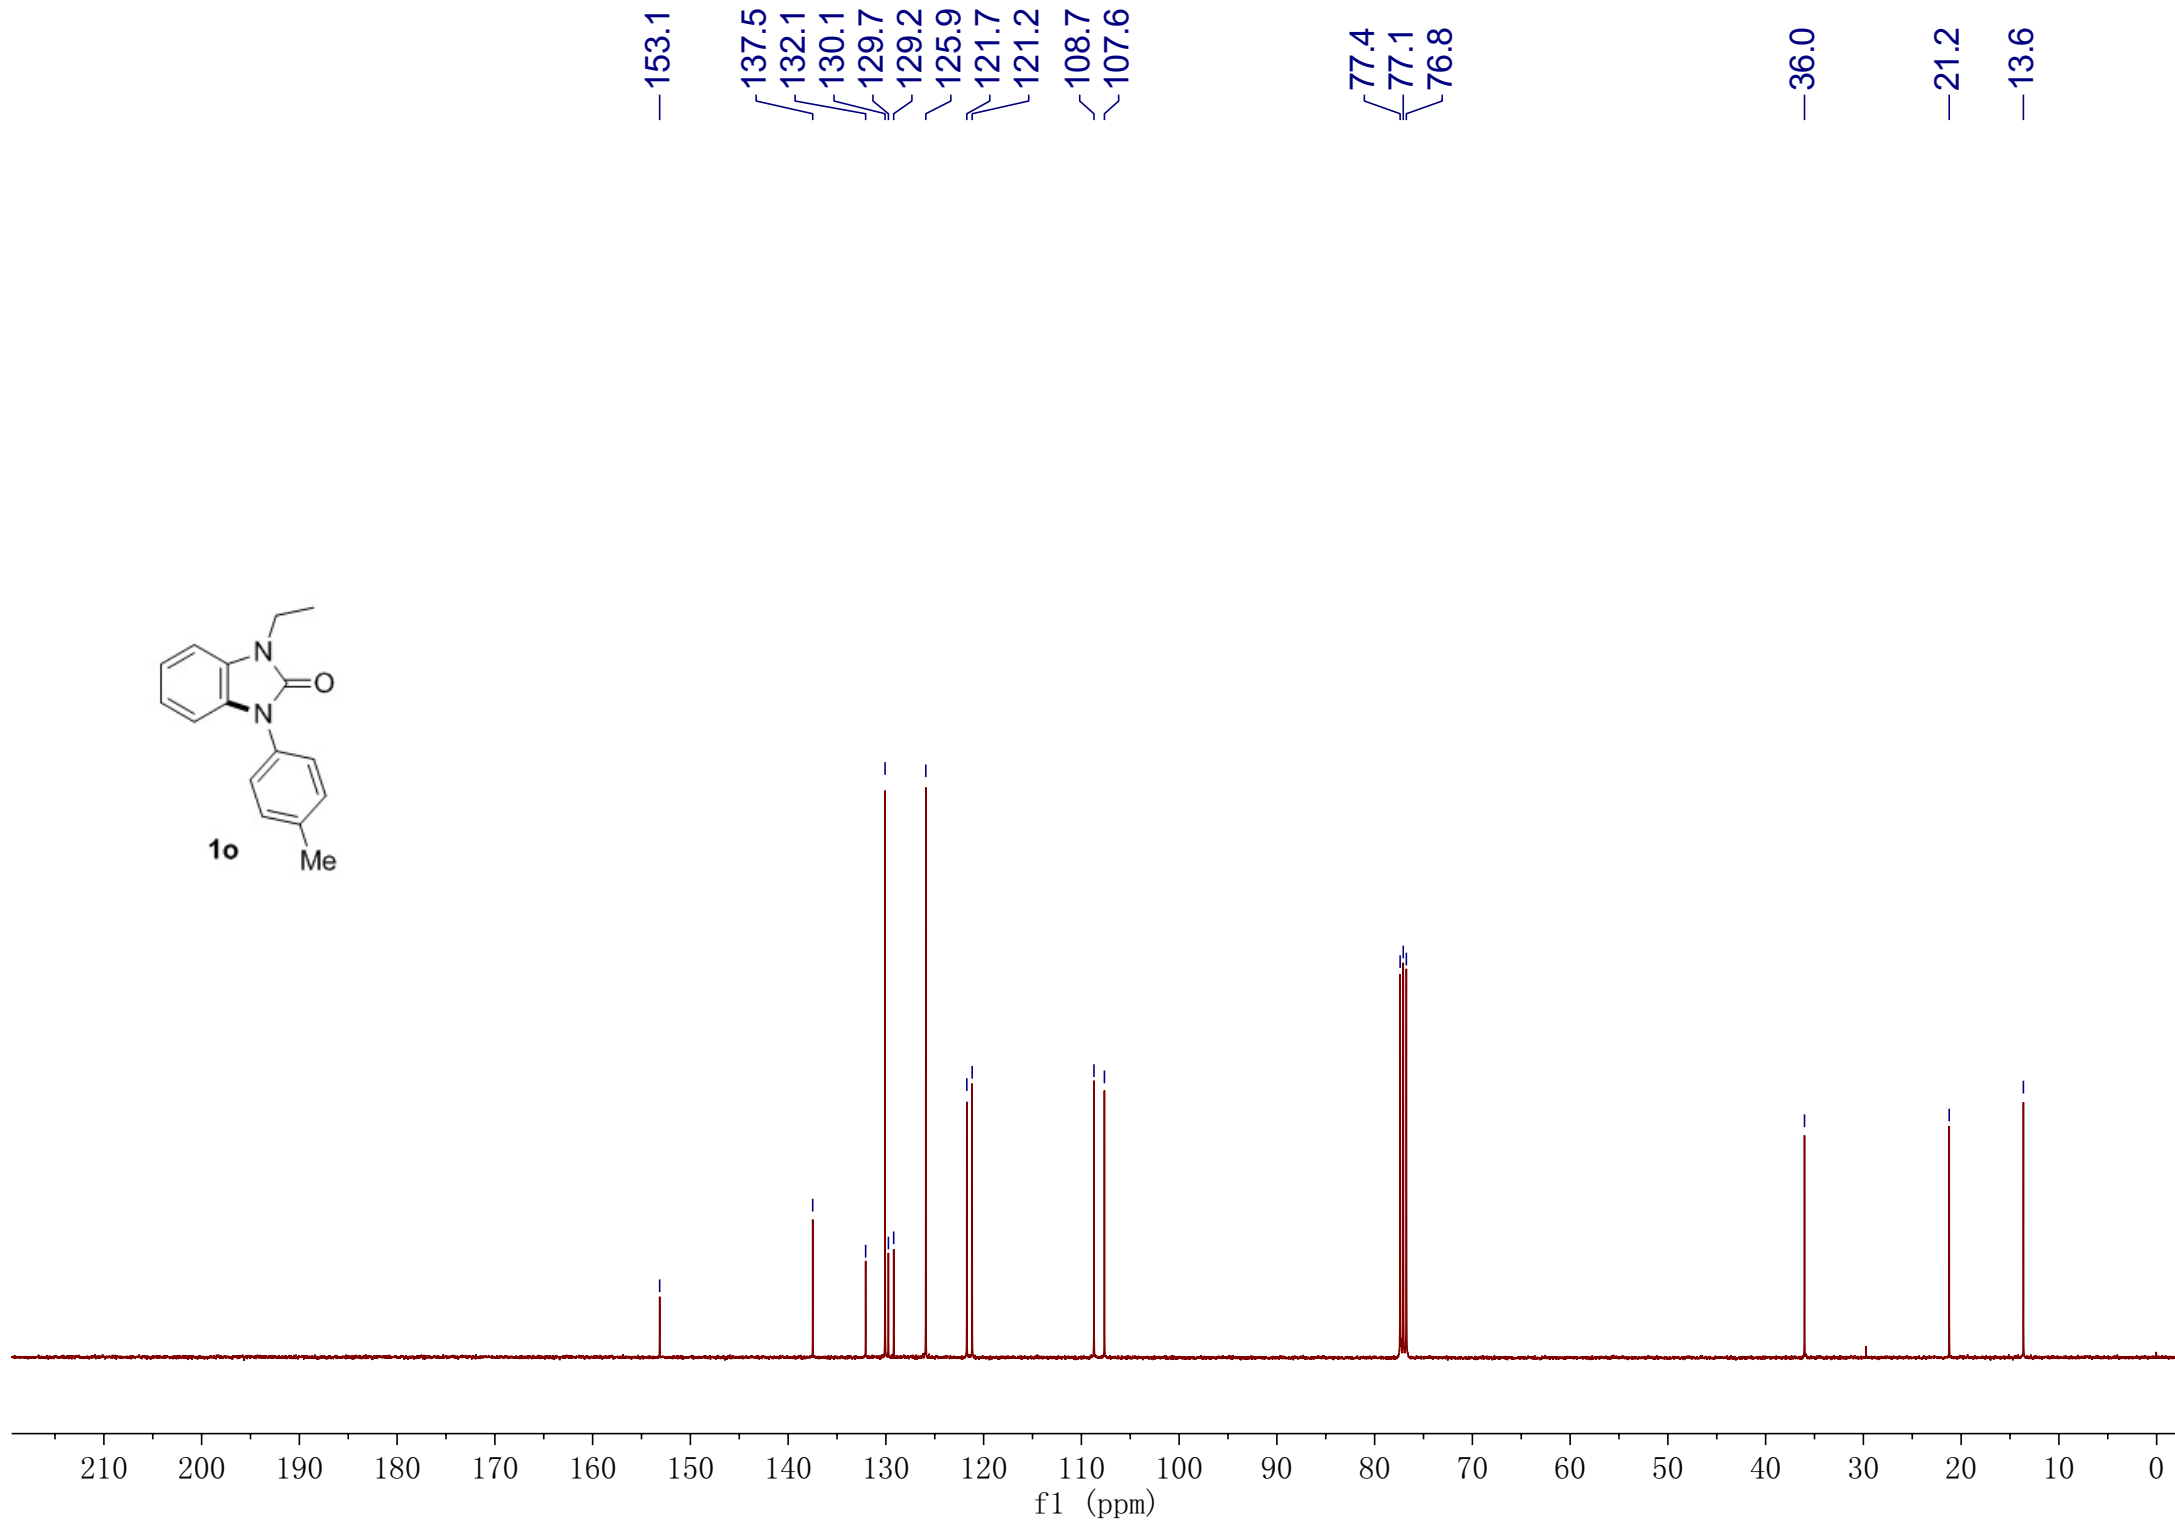

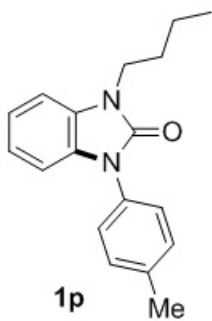

7.418  
7.414  
7.402  
7.397  
7.392  
7.320  
7.300  
7.247  
7.139  
7.133  
7.124  
7.119  
7.114  
7.103  
7.098  
7.064  
7.054  
7.051  
7.049  
7.034  
7.031

3.960  
3.942  
3.924

-2.411  
1.811  
1.792  
1.774  
1.471  
1.452  
1.433  
0.994  
0.976  
0.958

-0.000

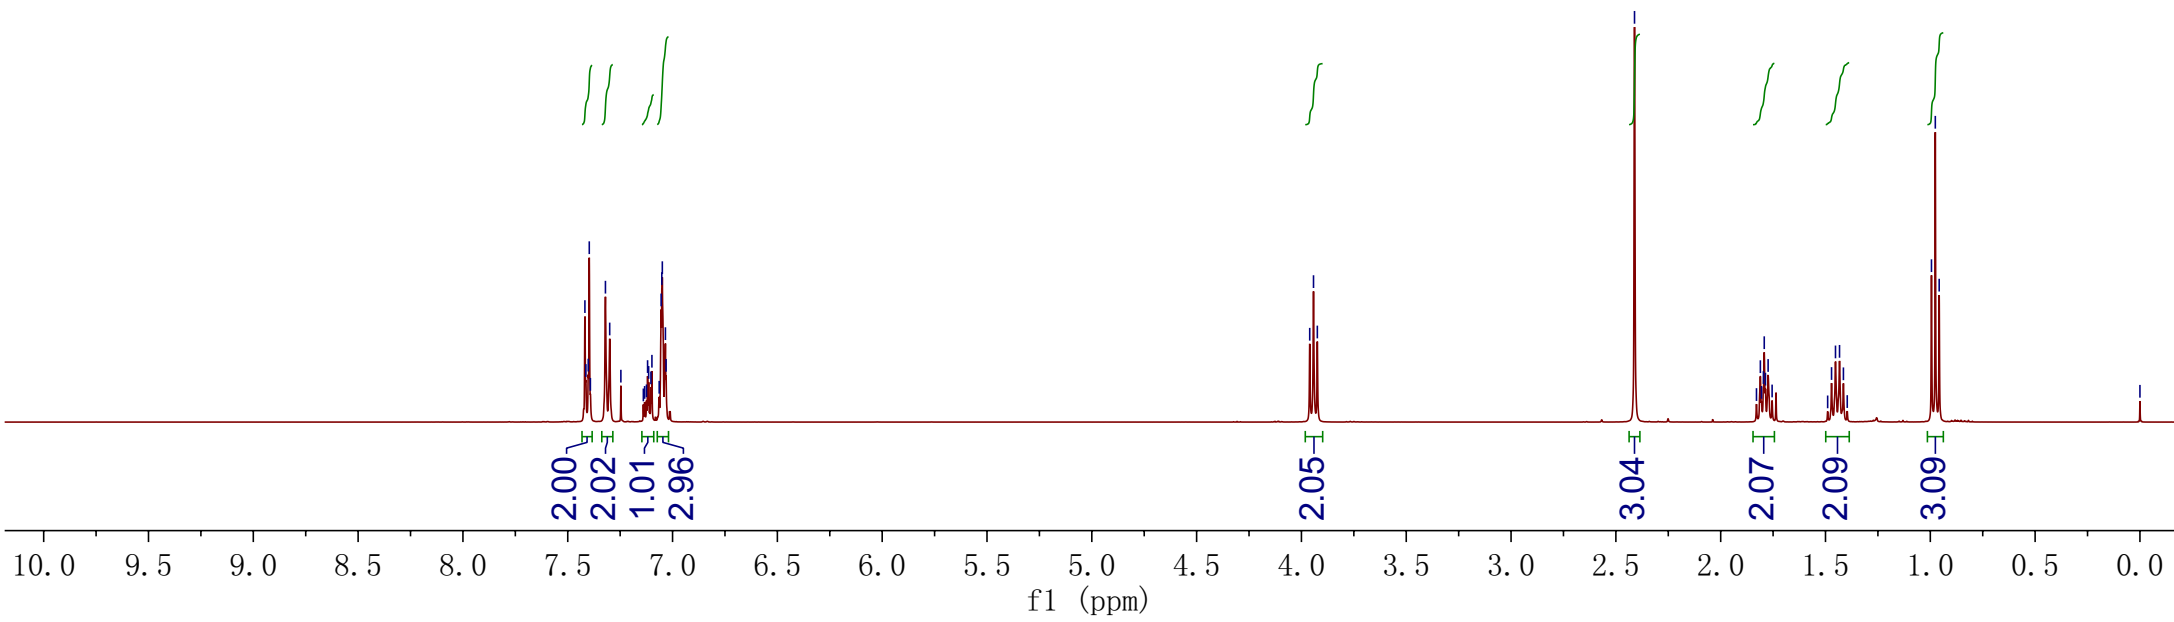



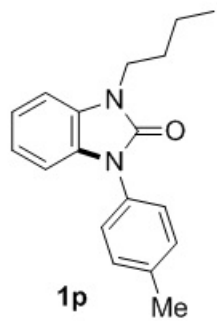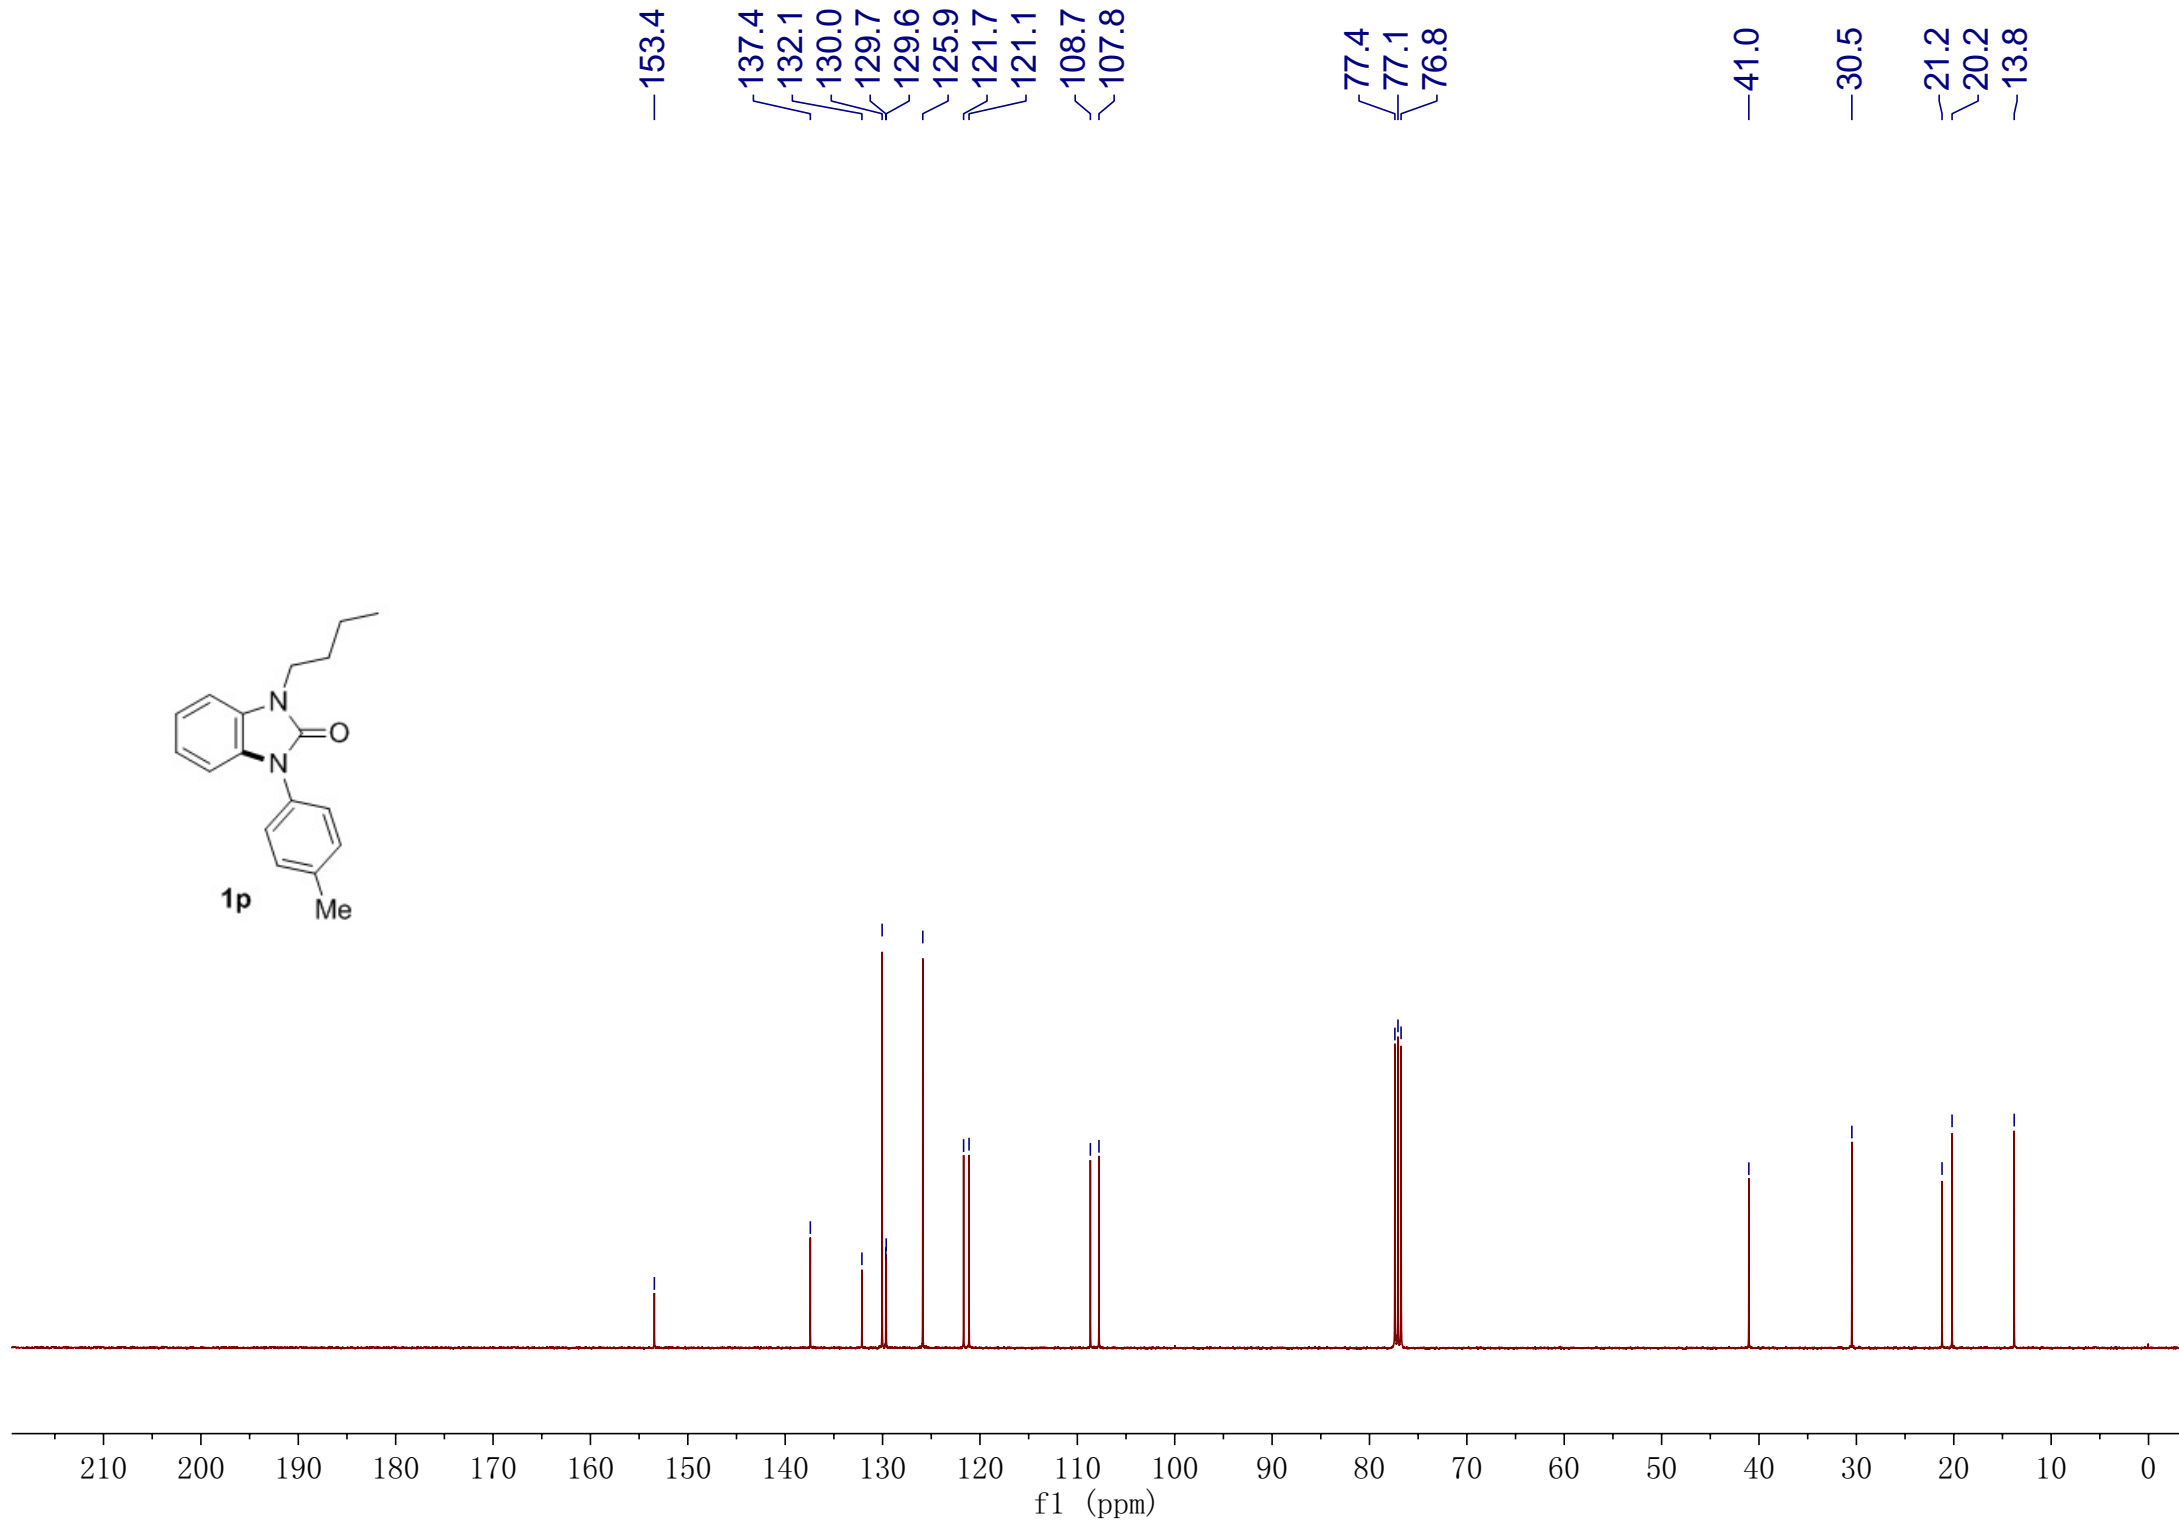

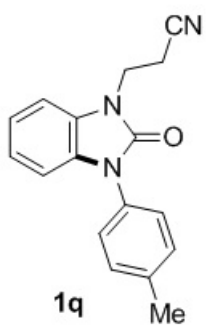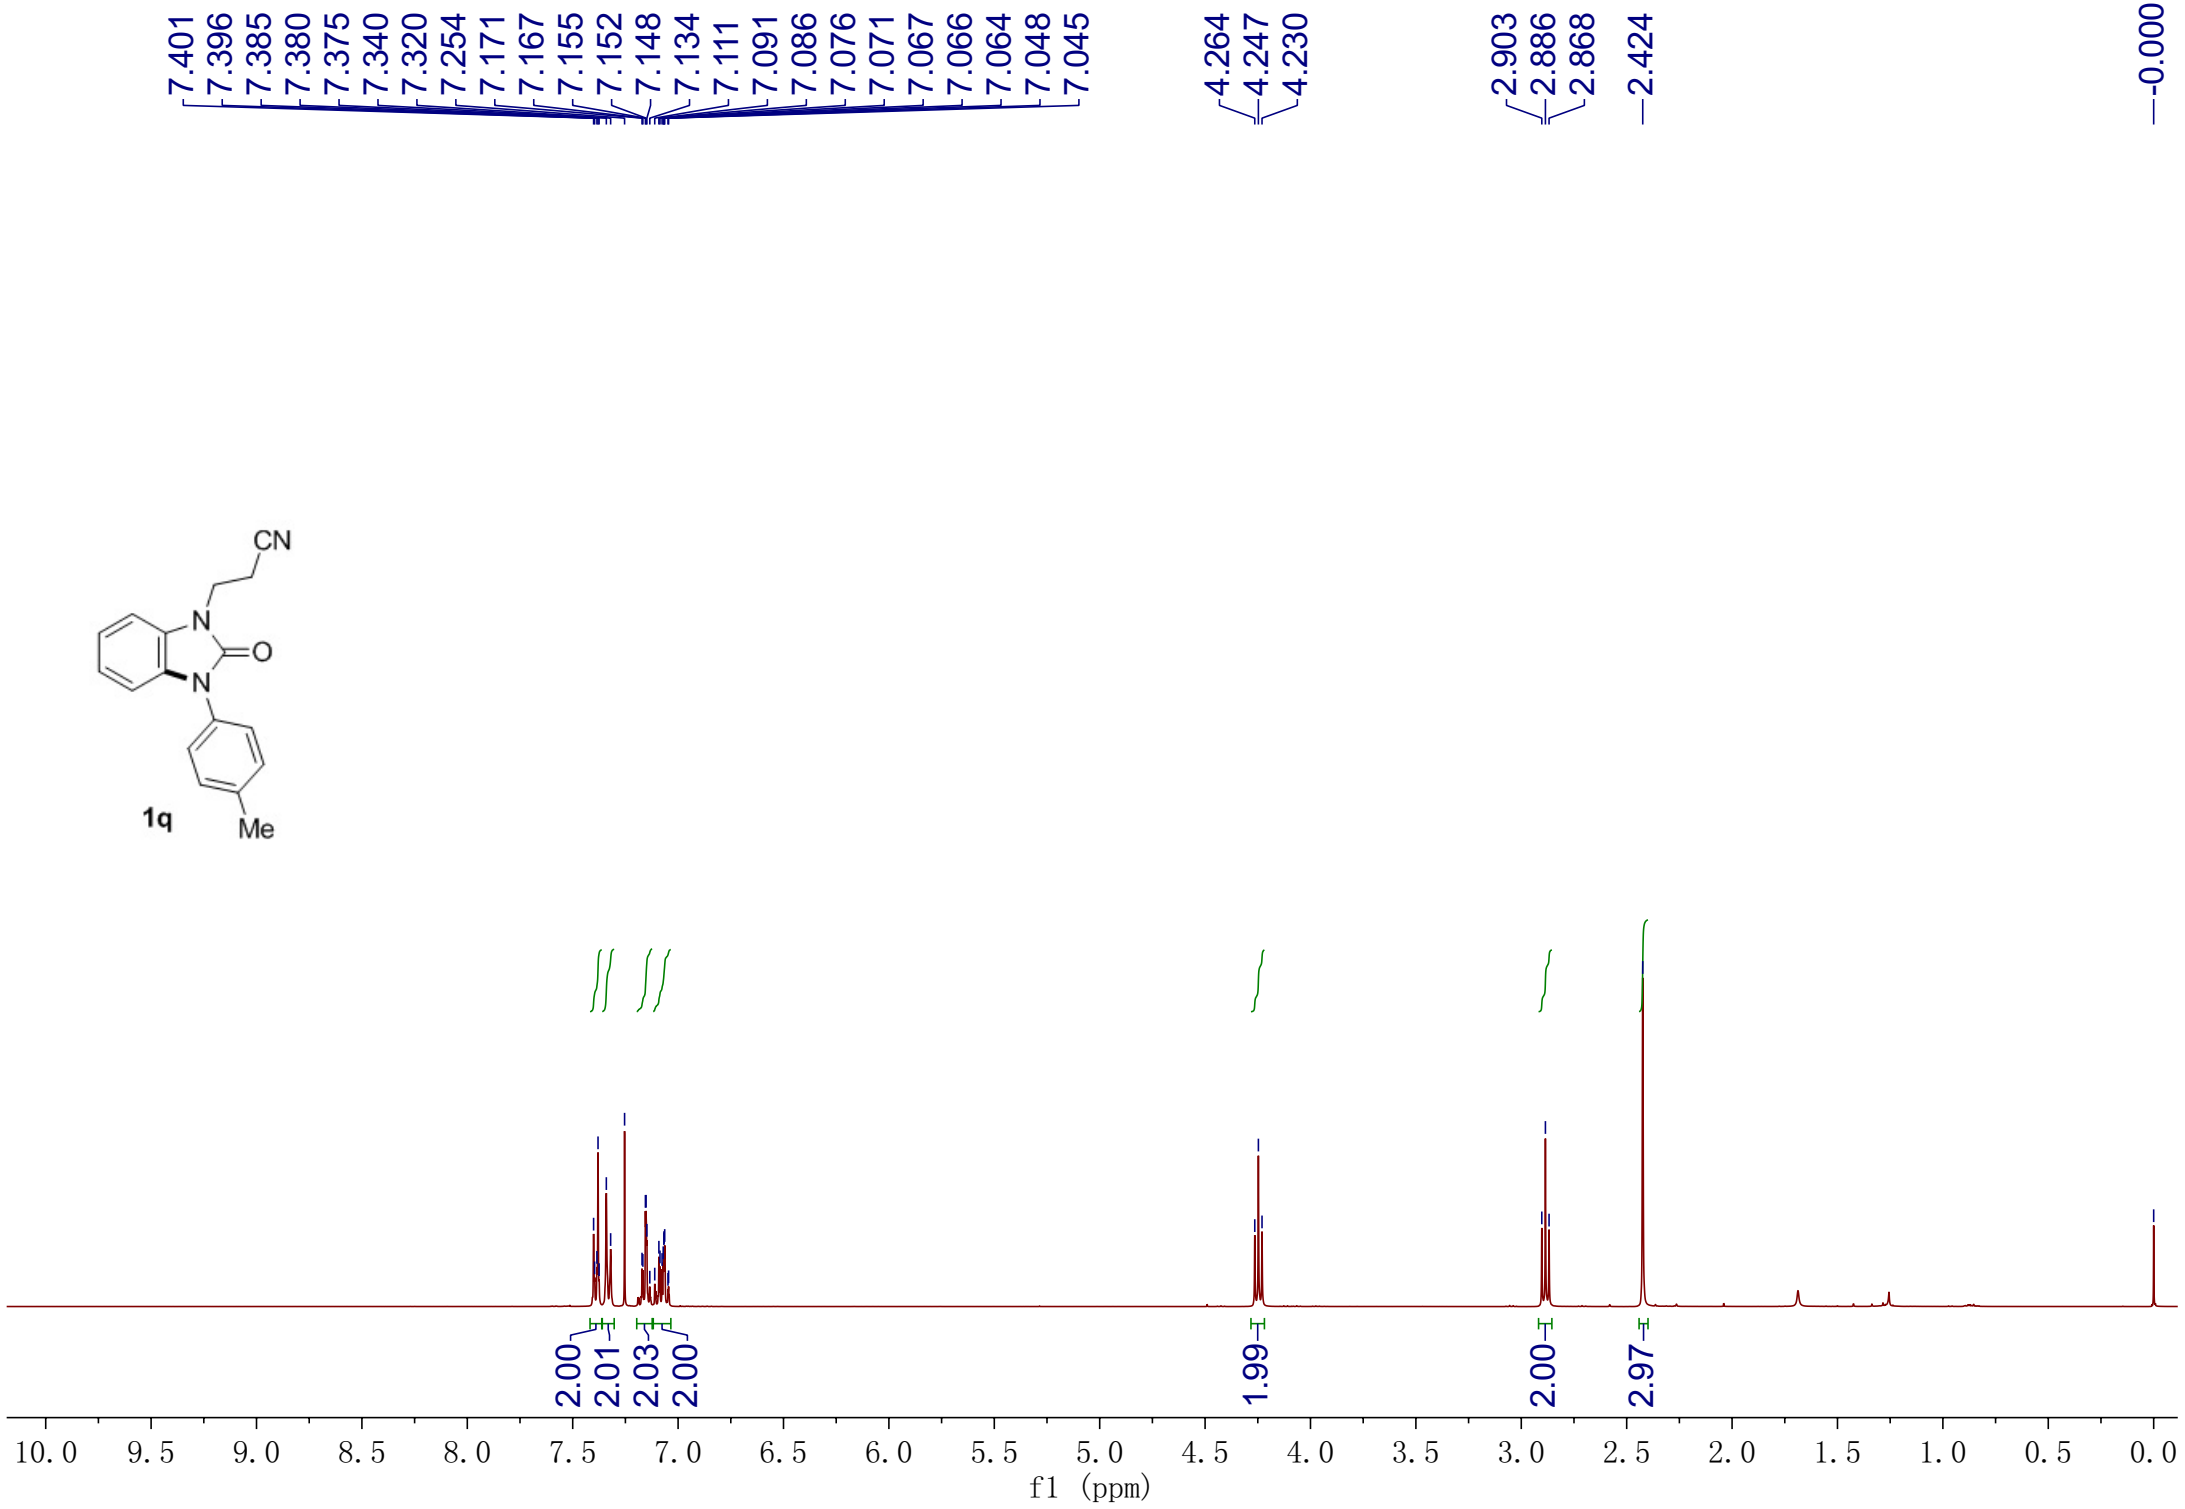

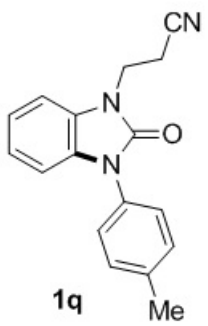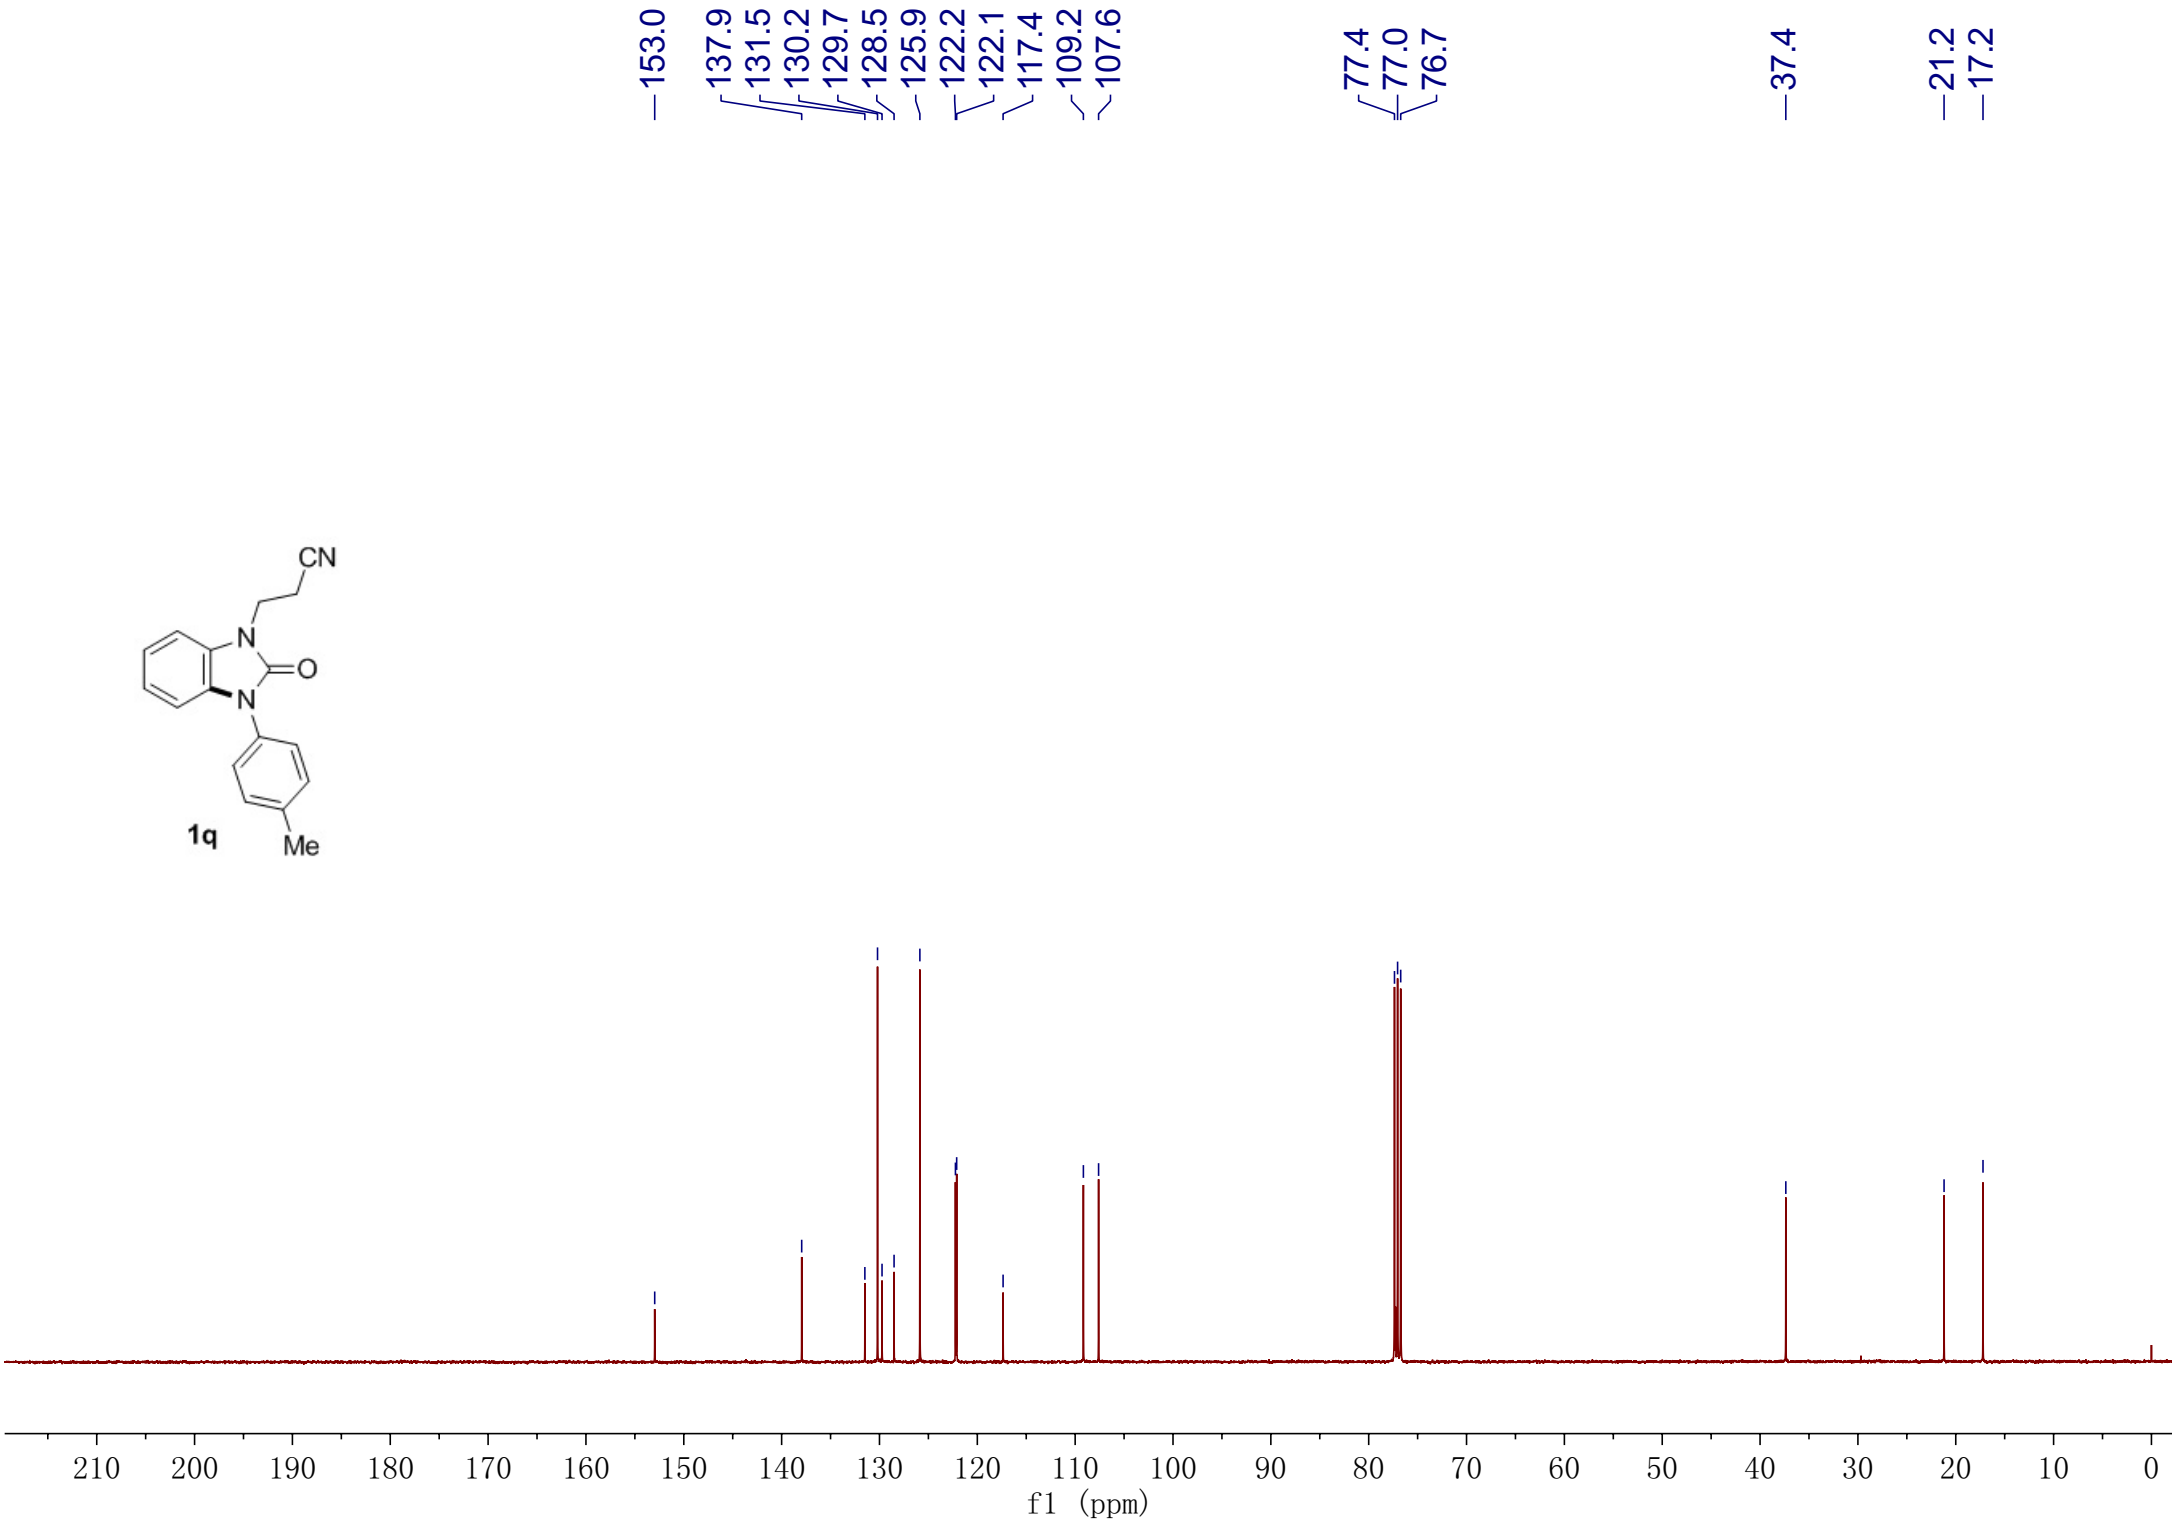

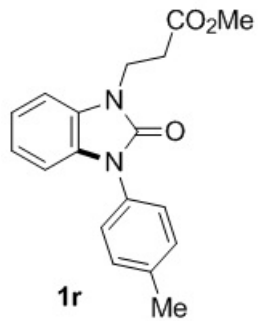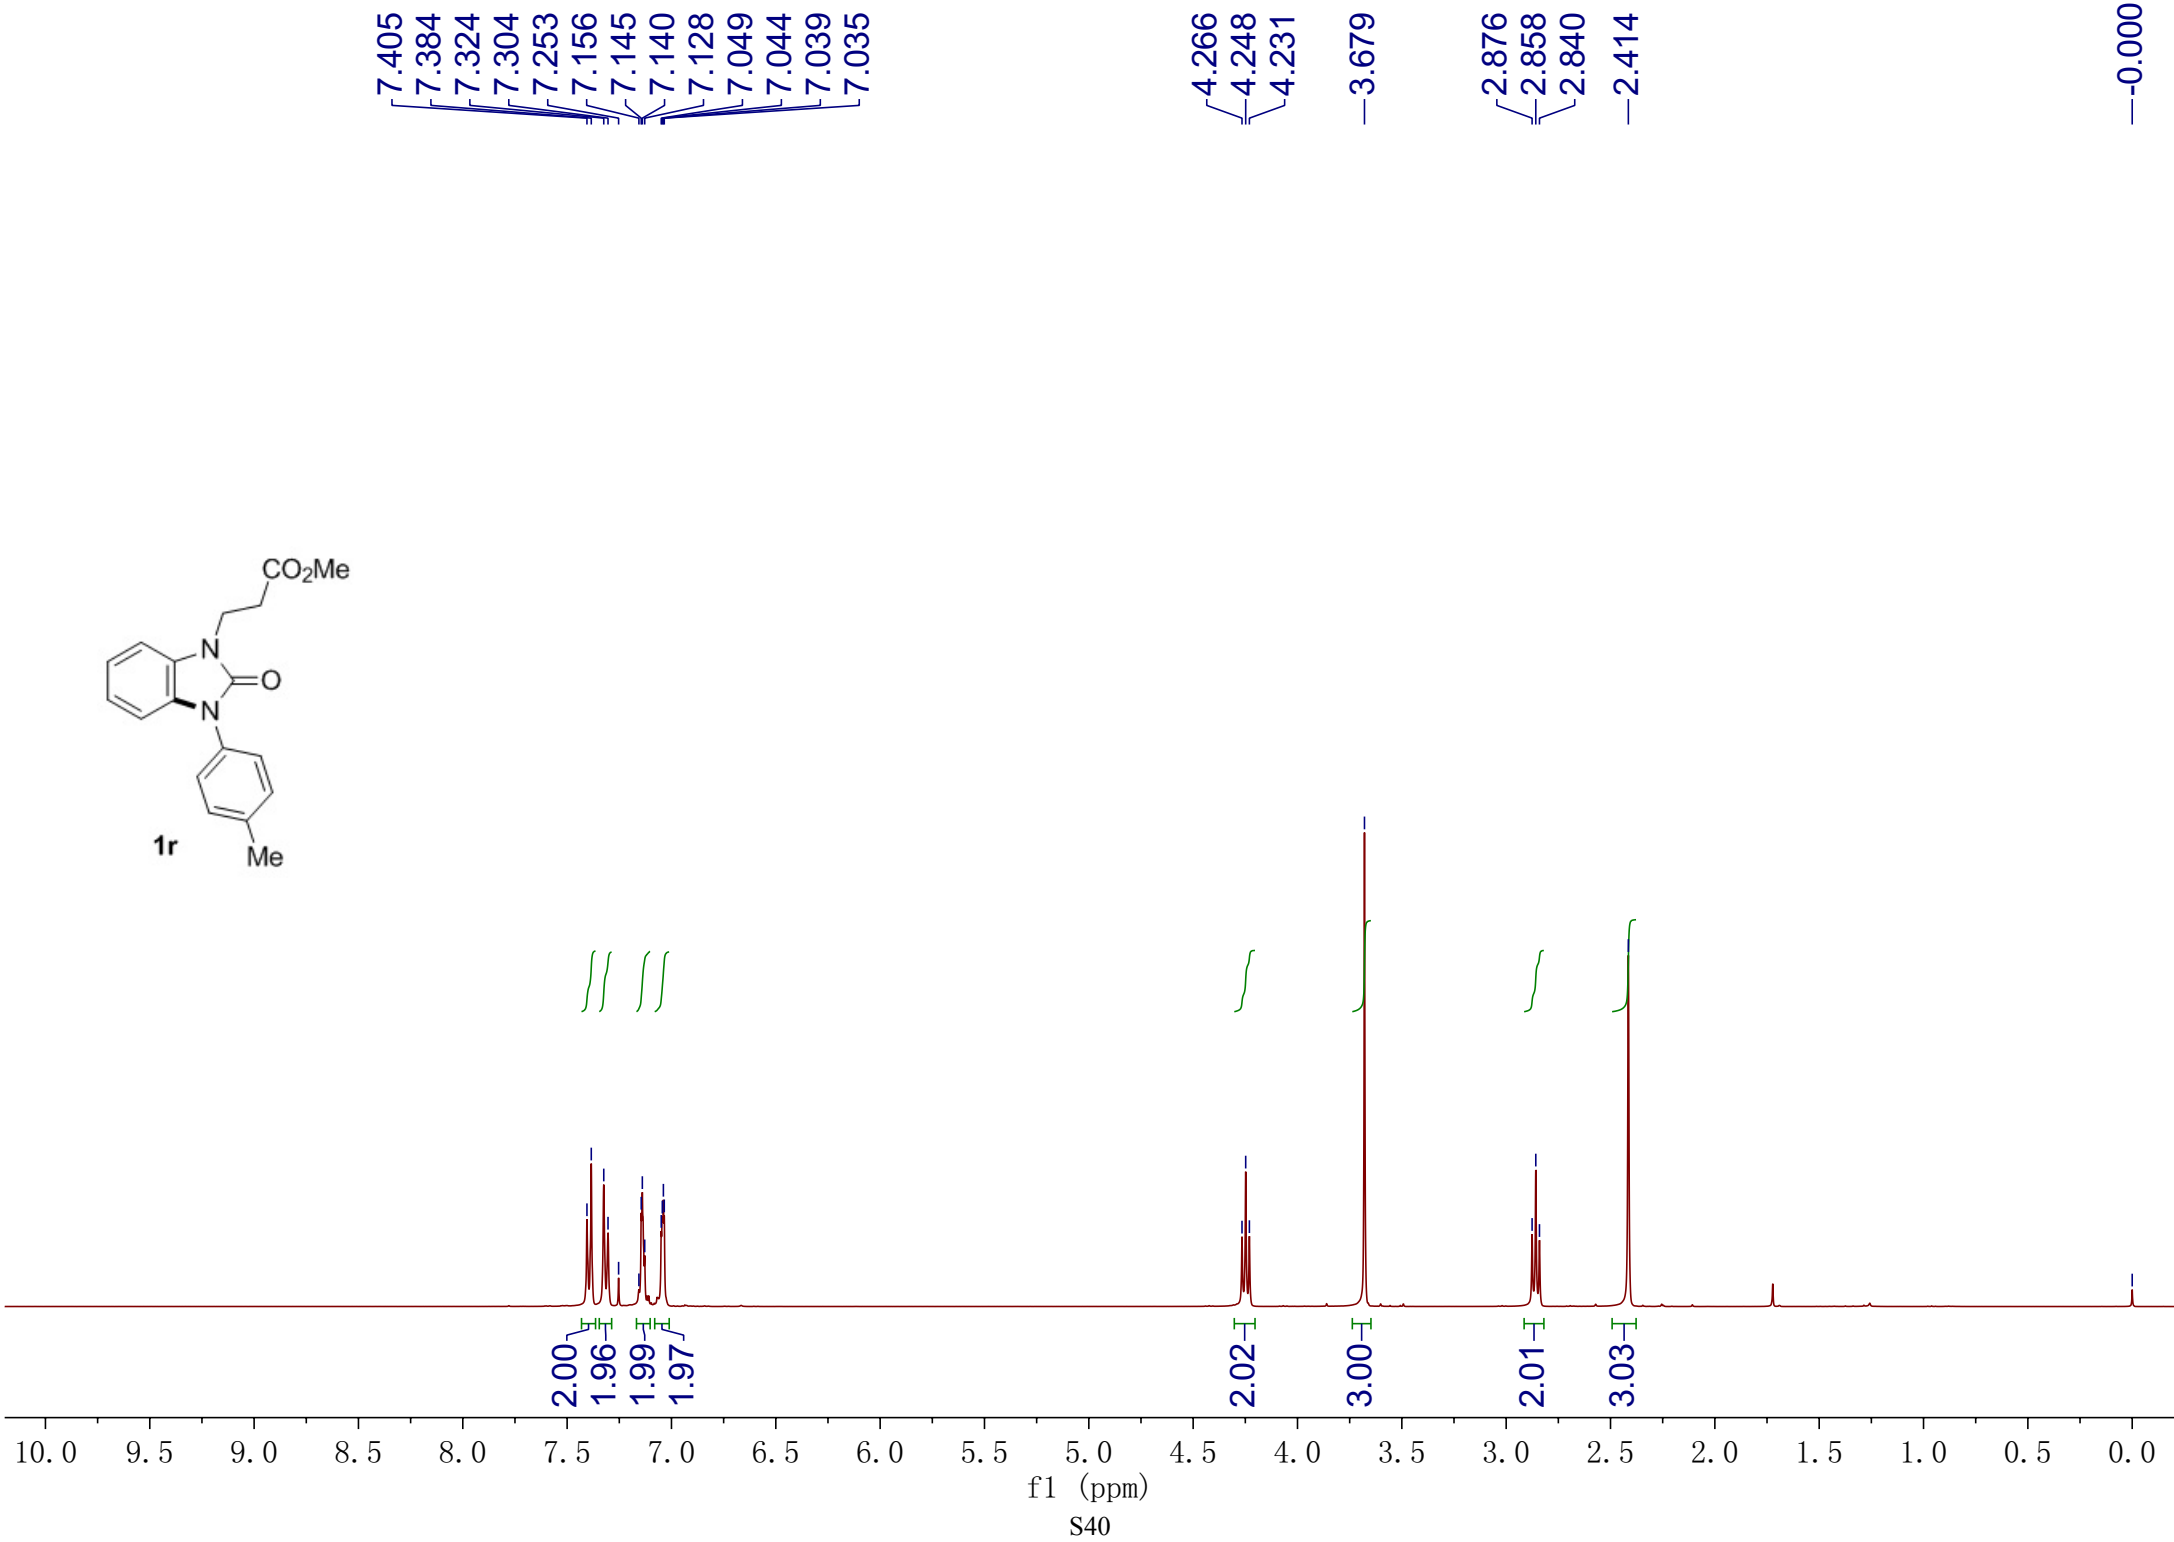

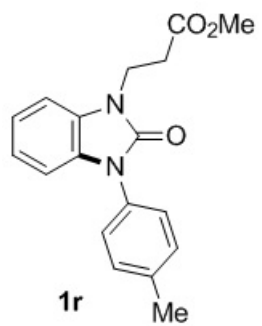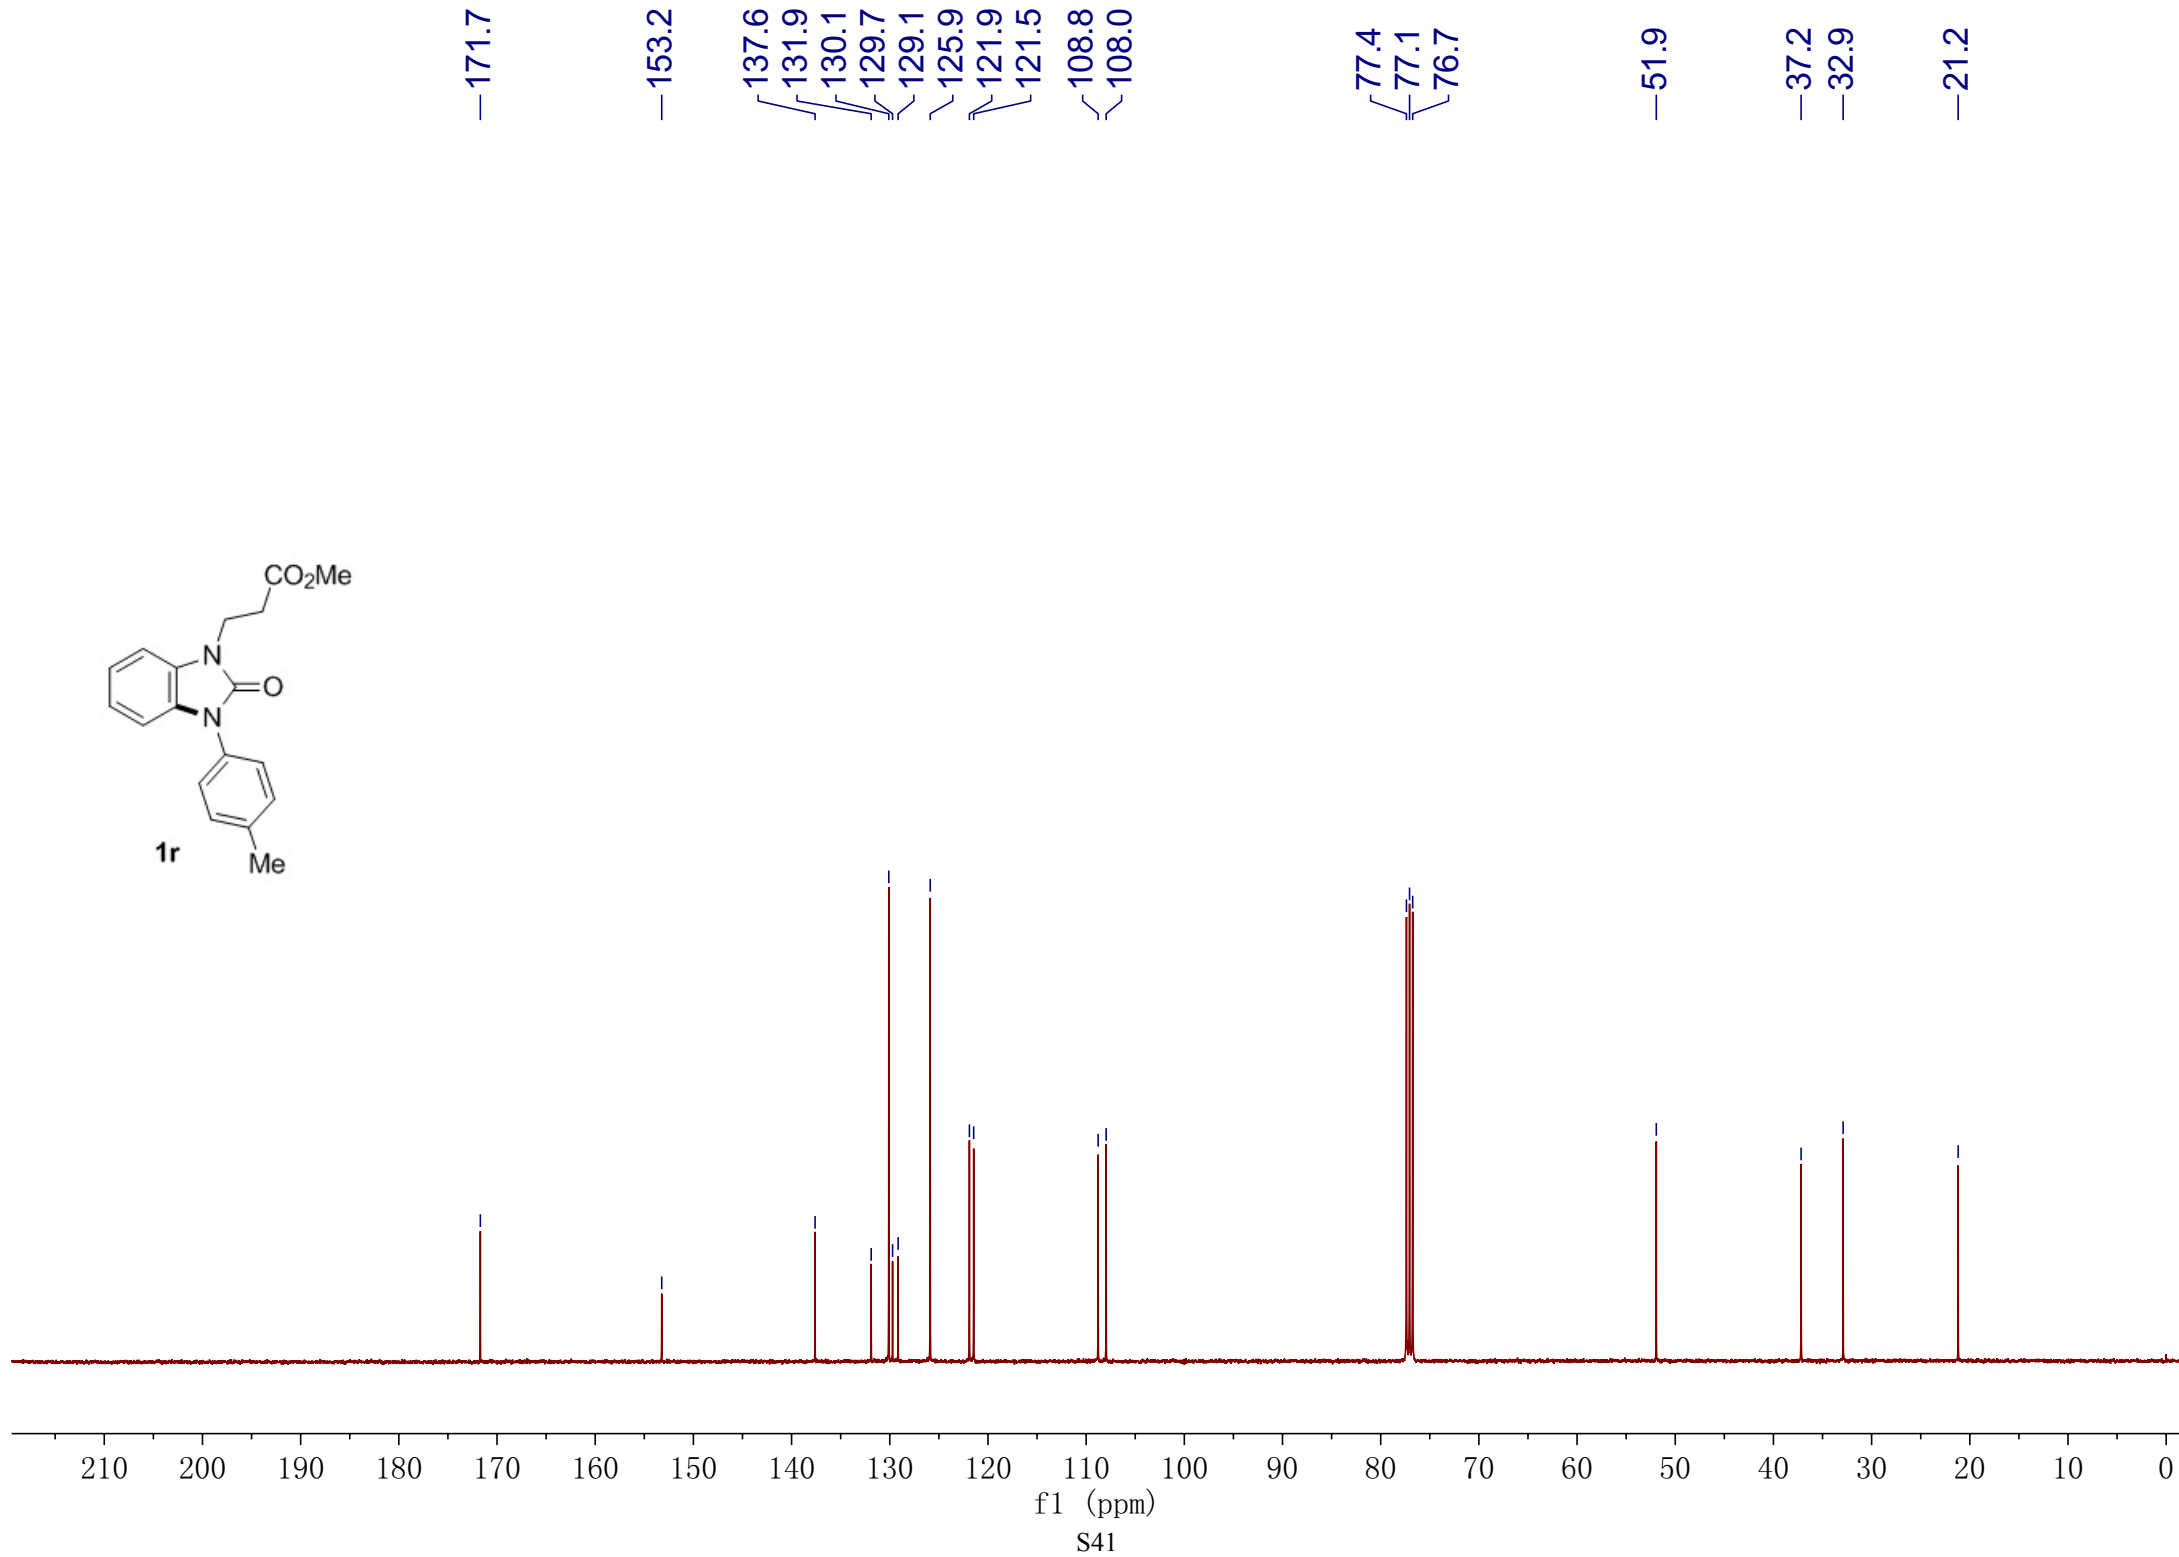

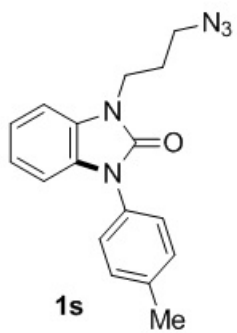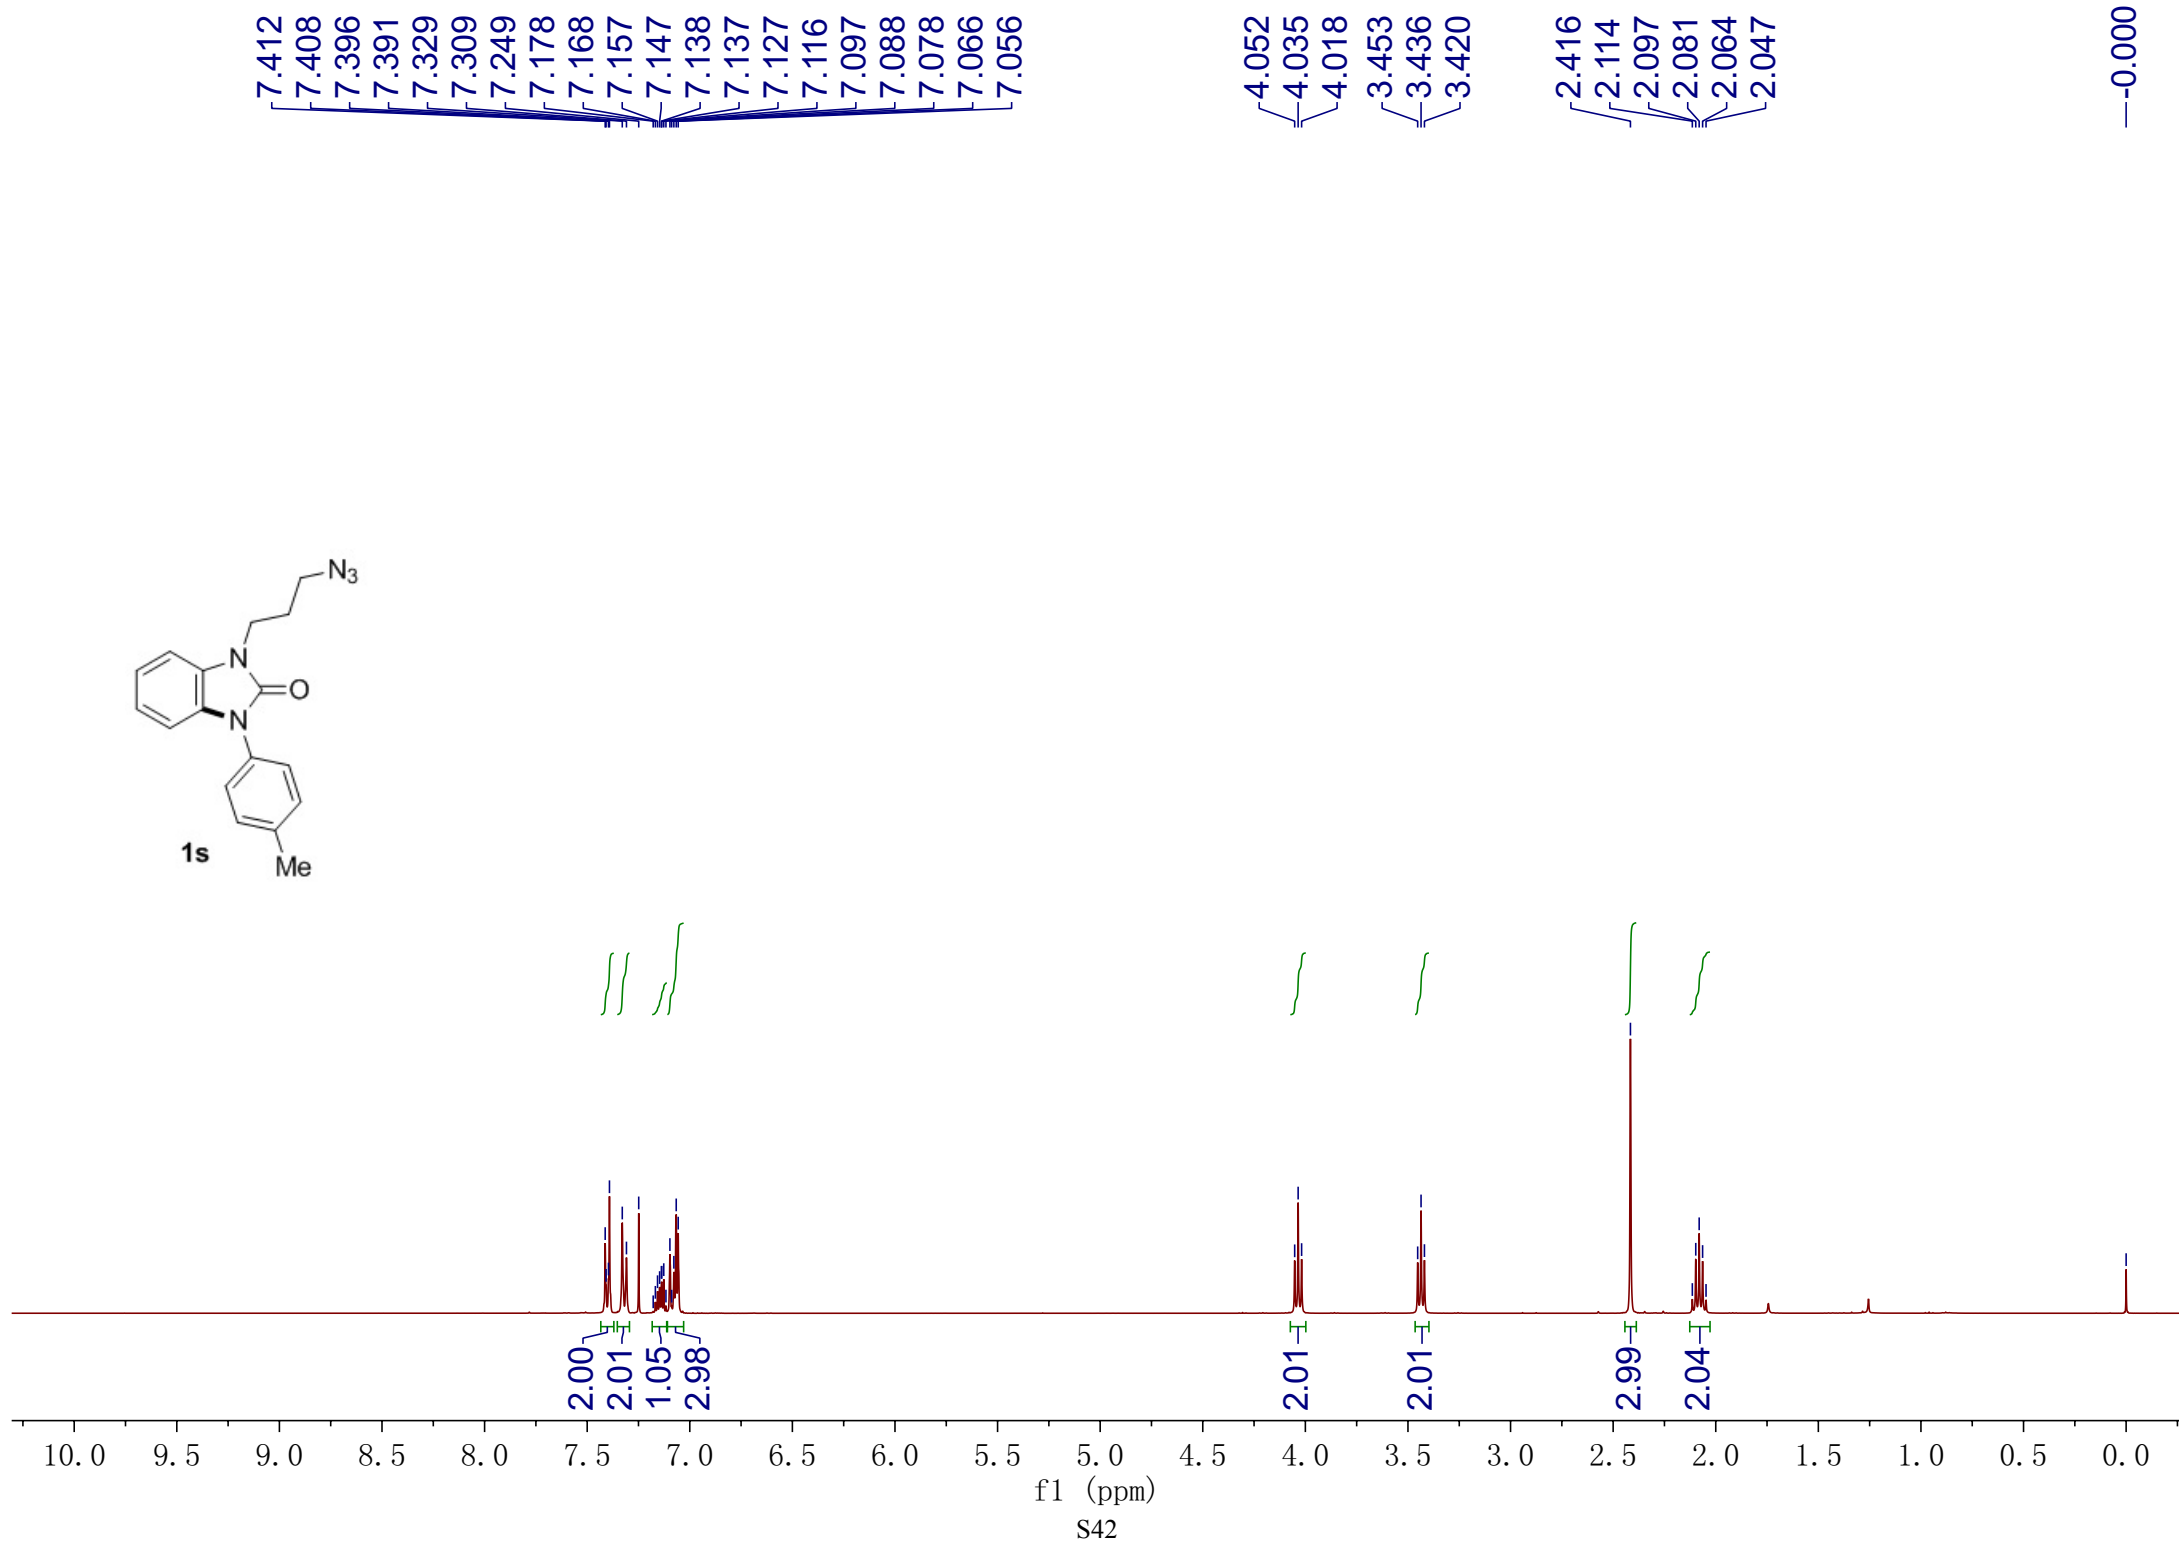

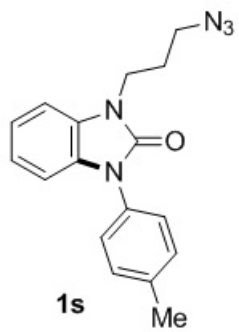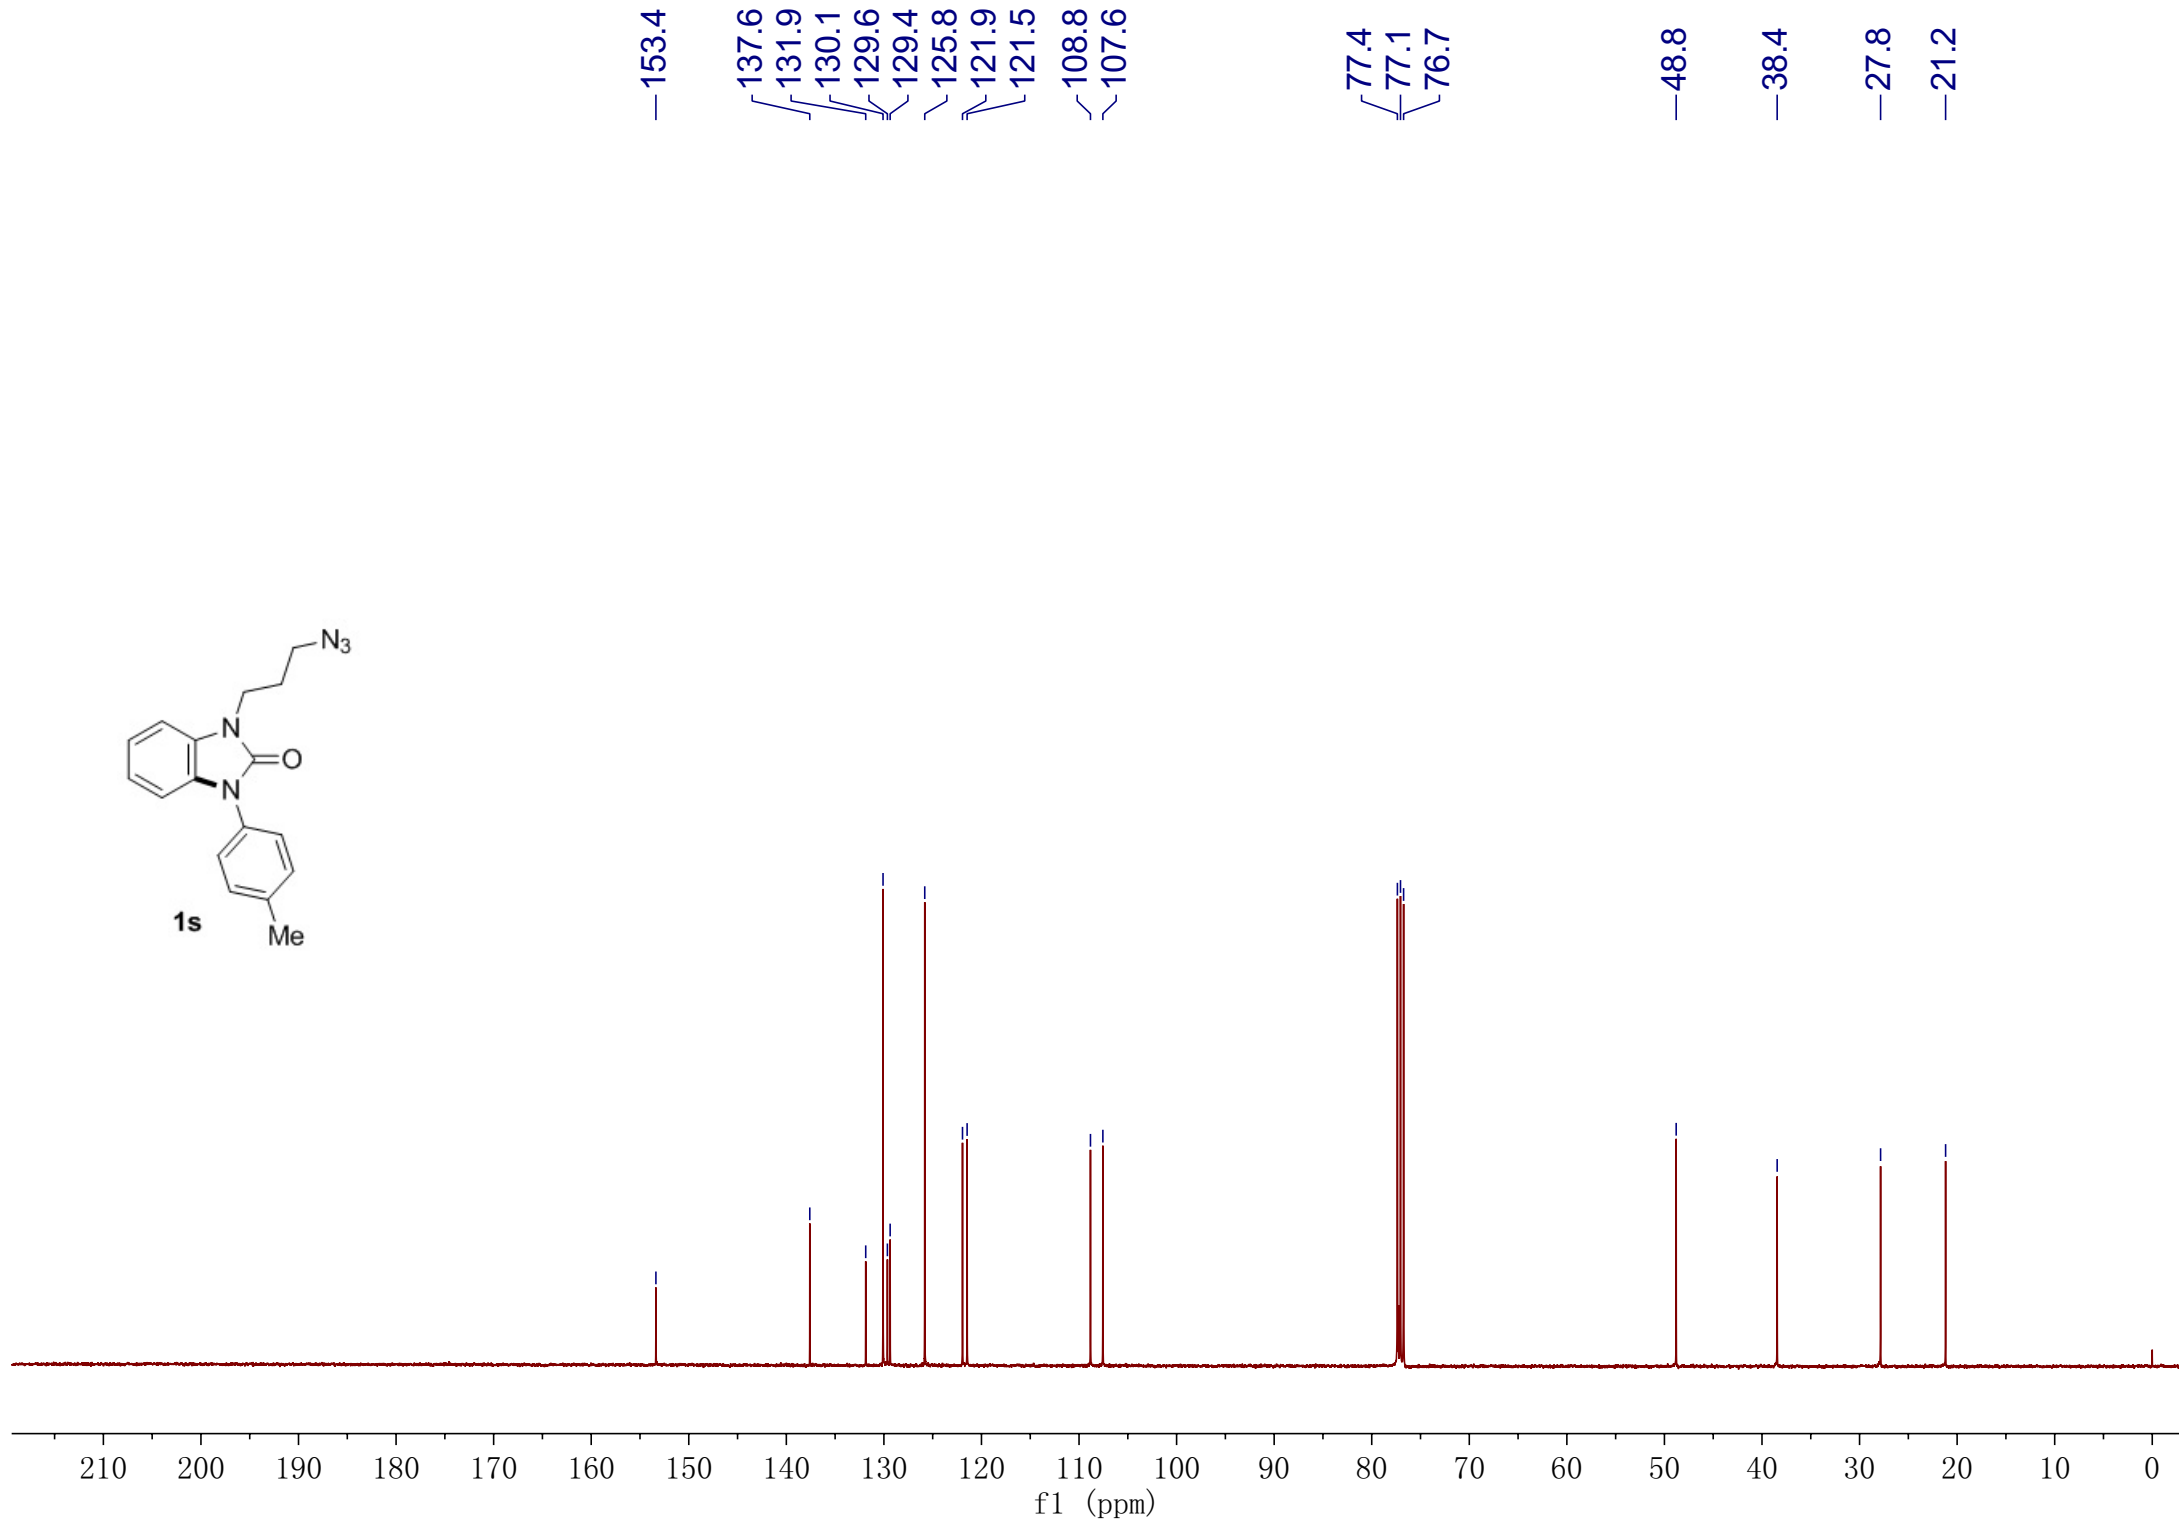

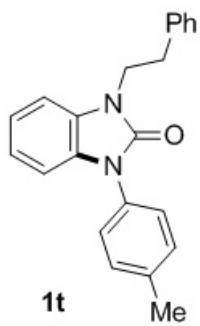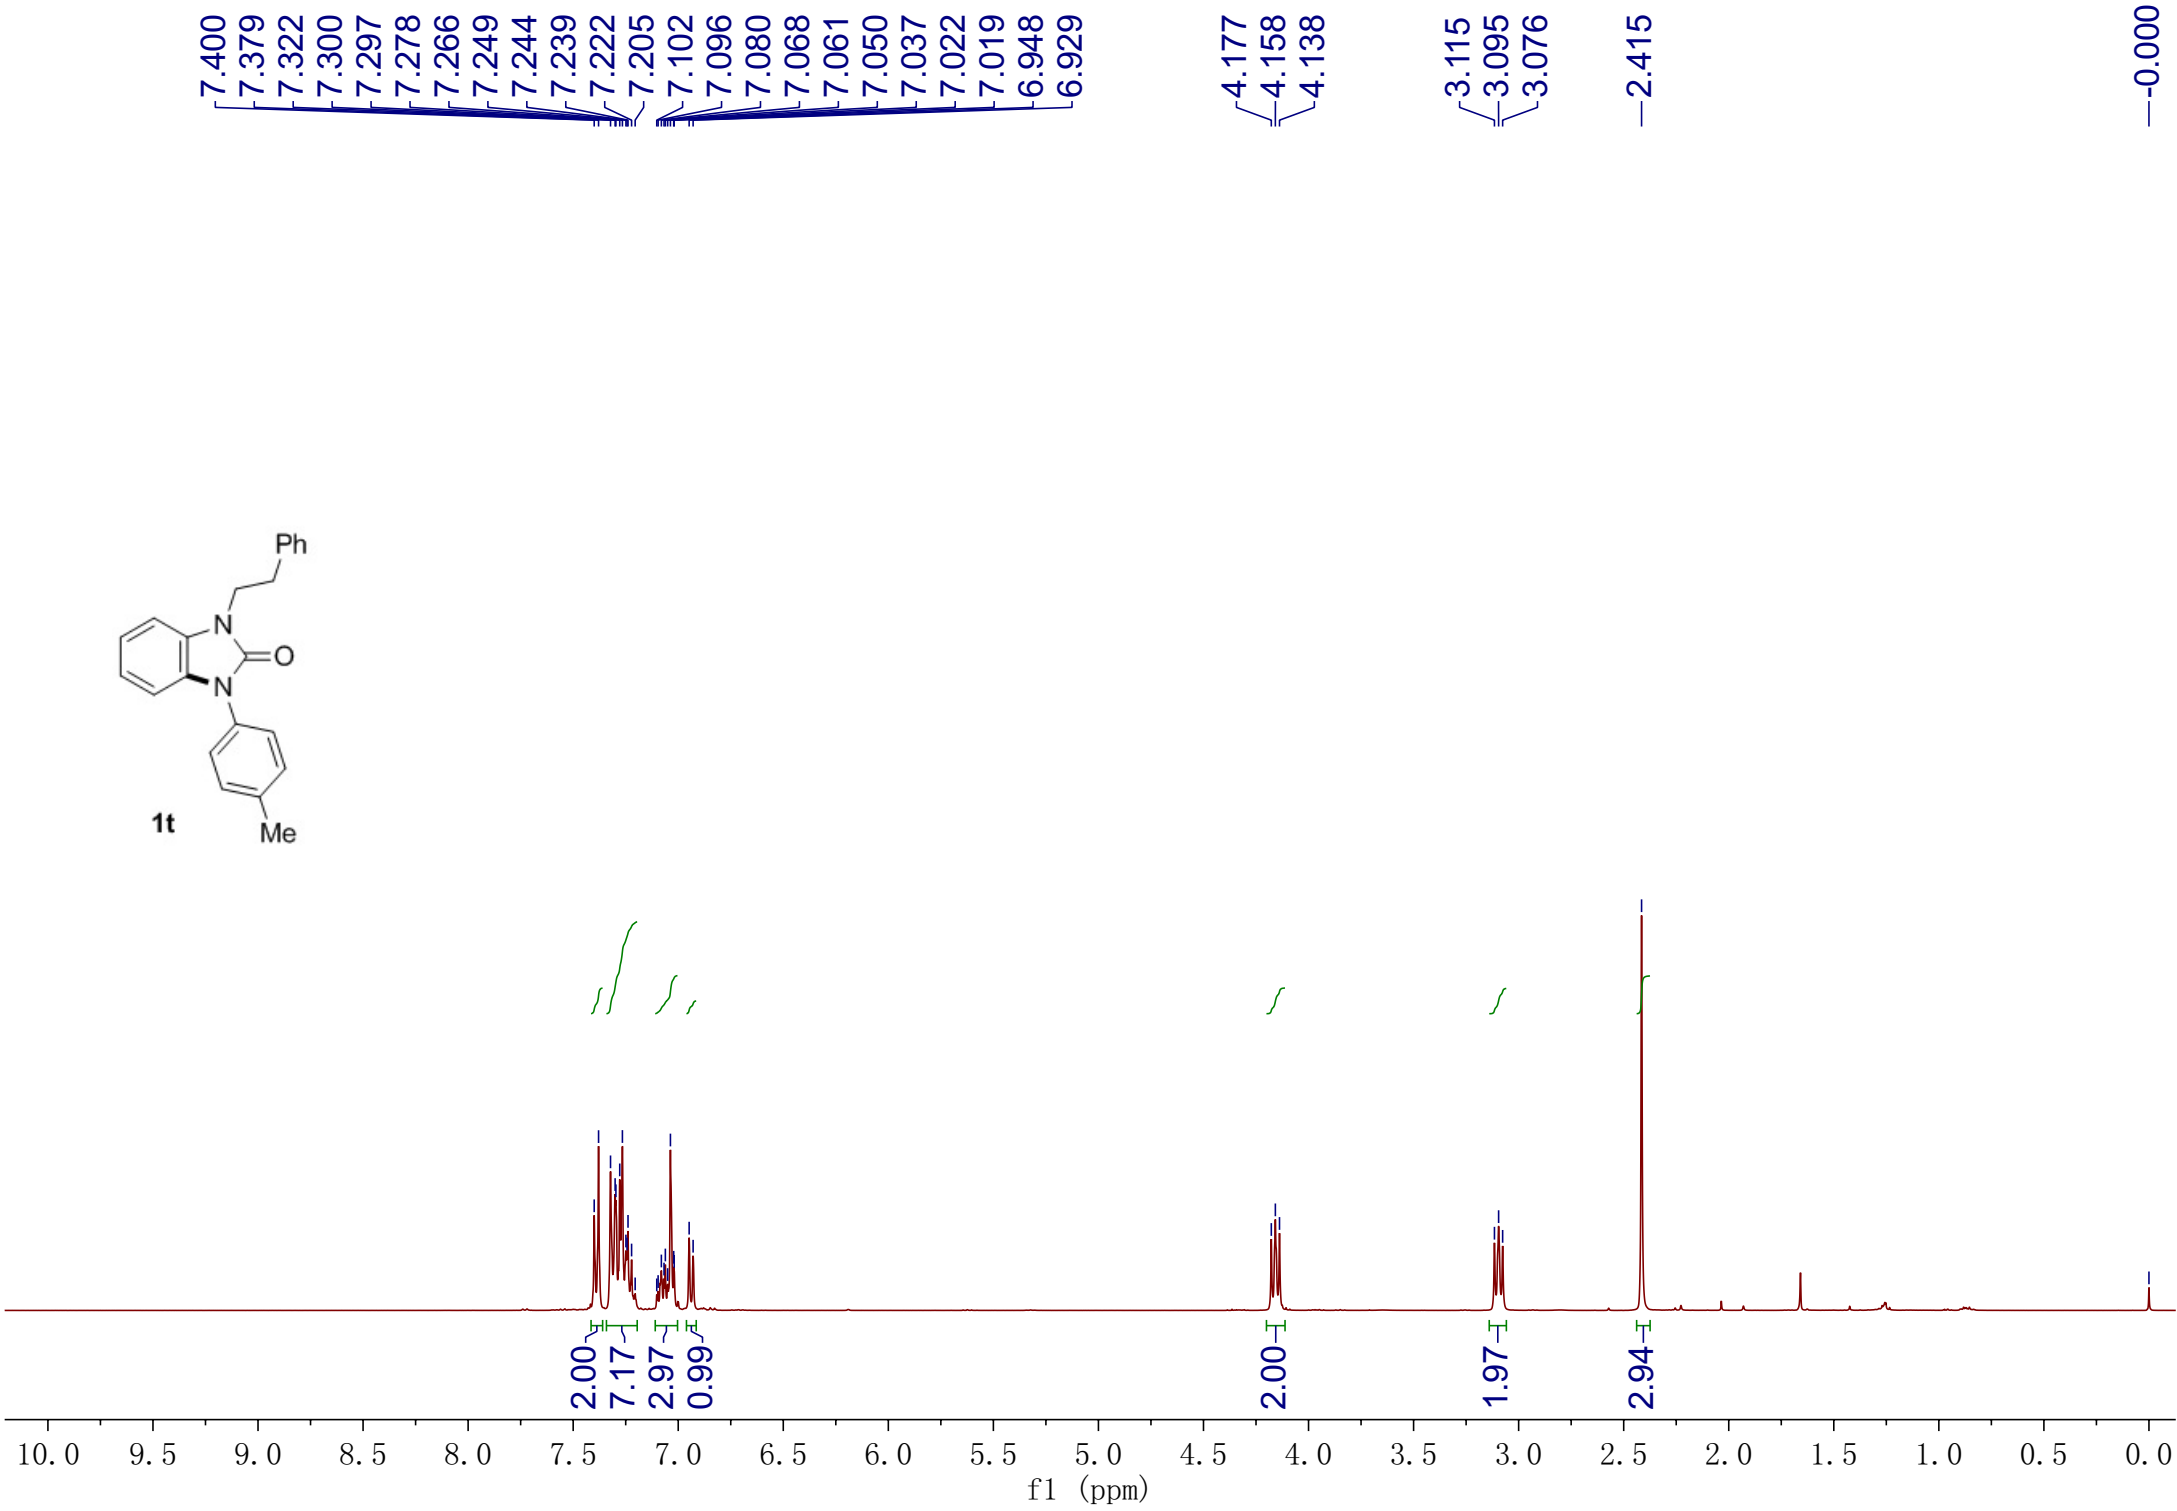



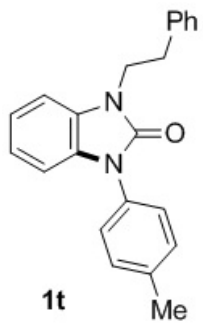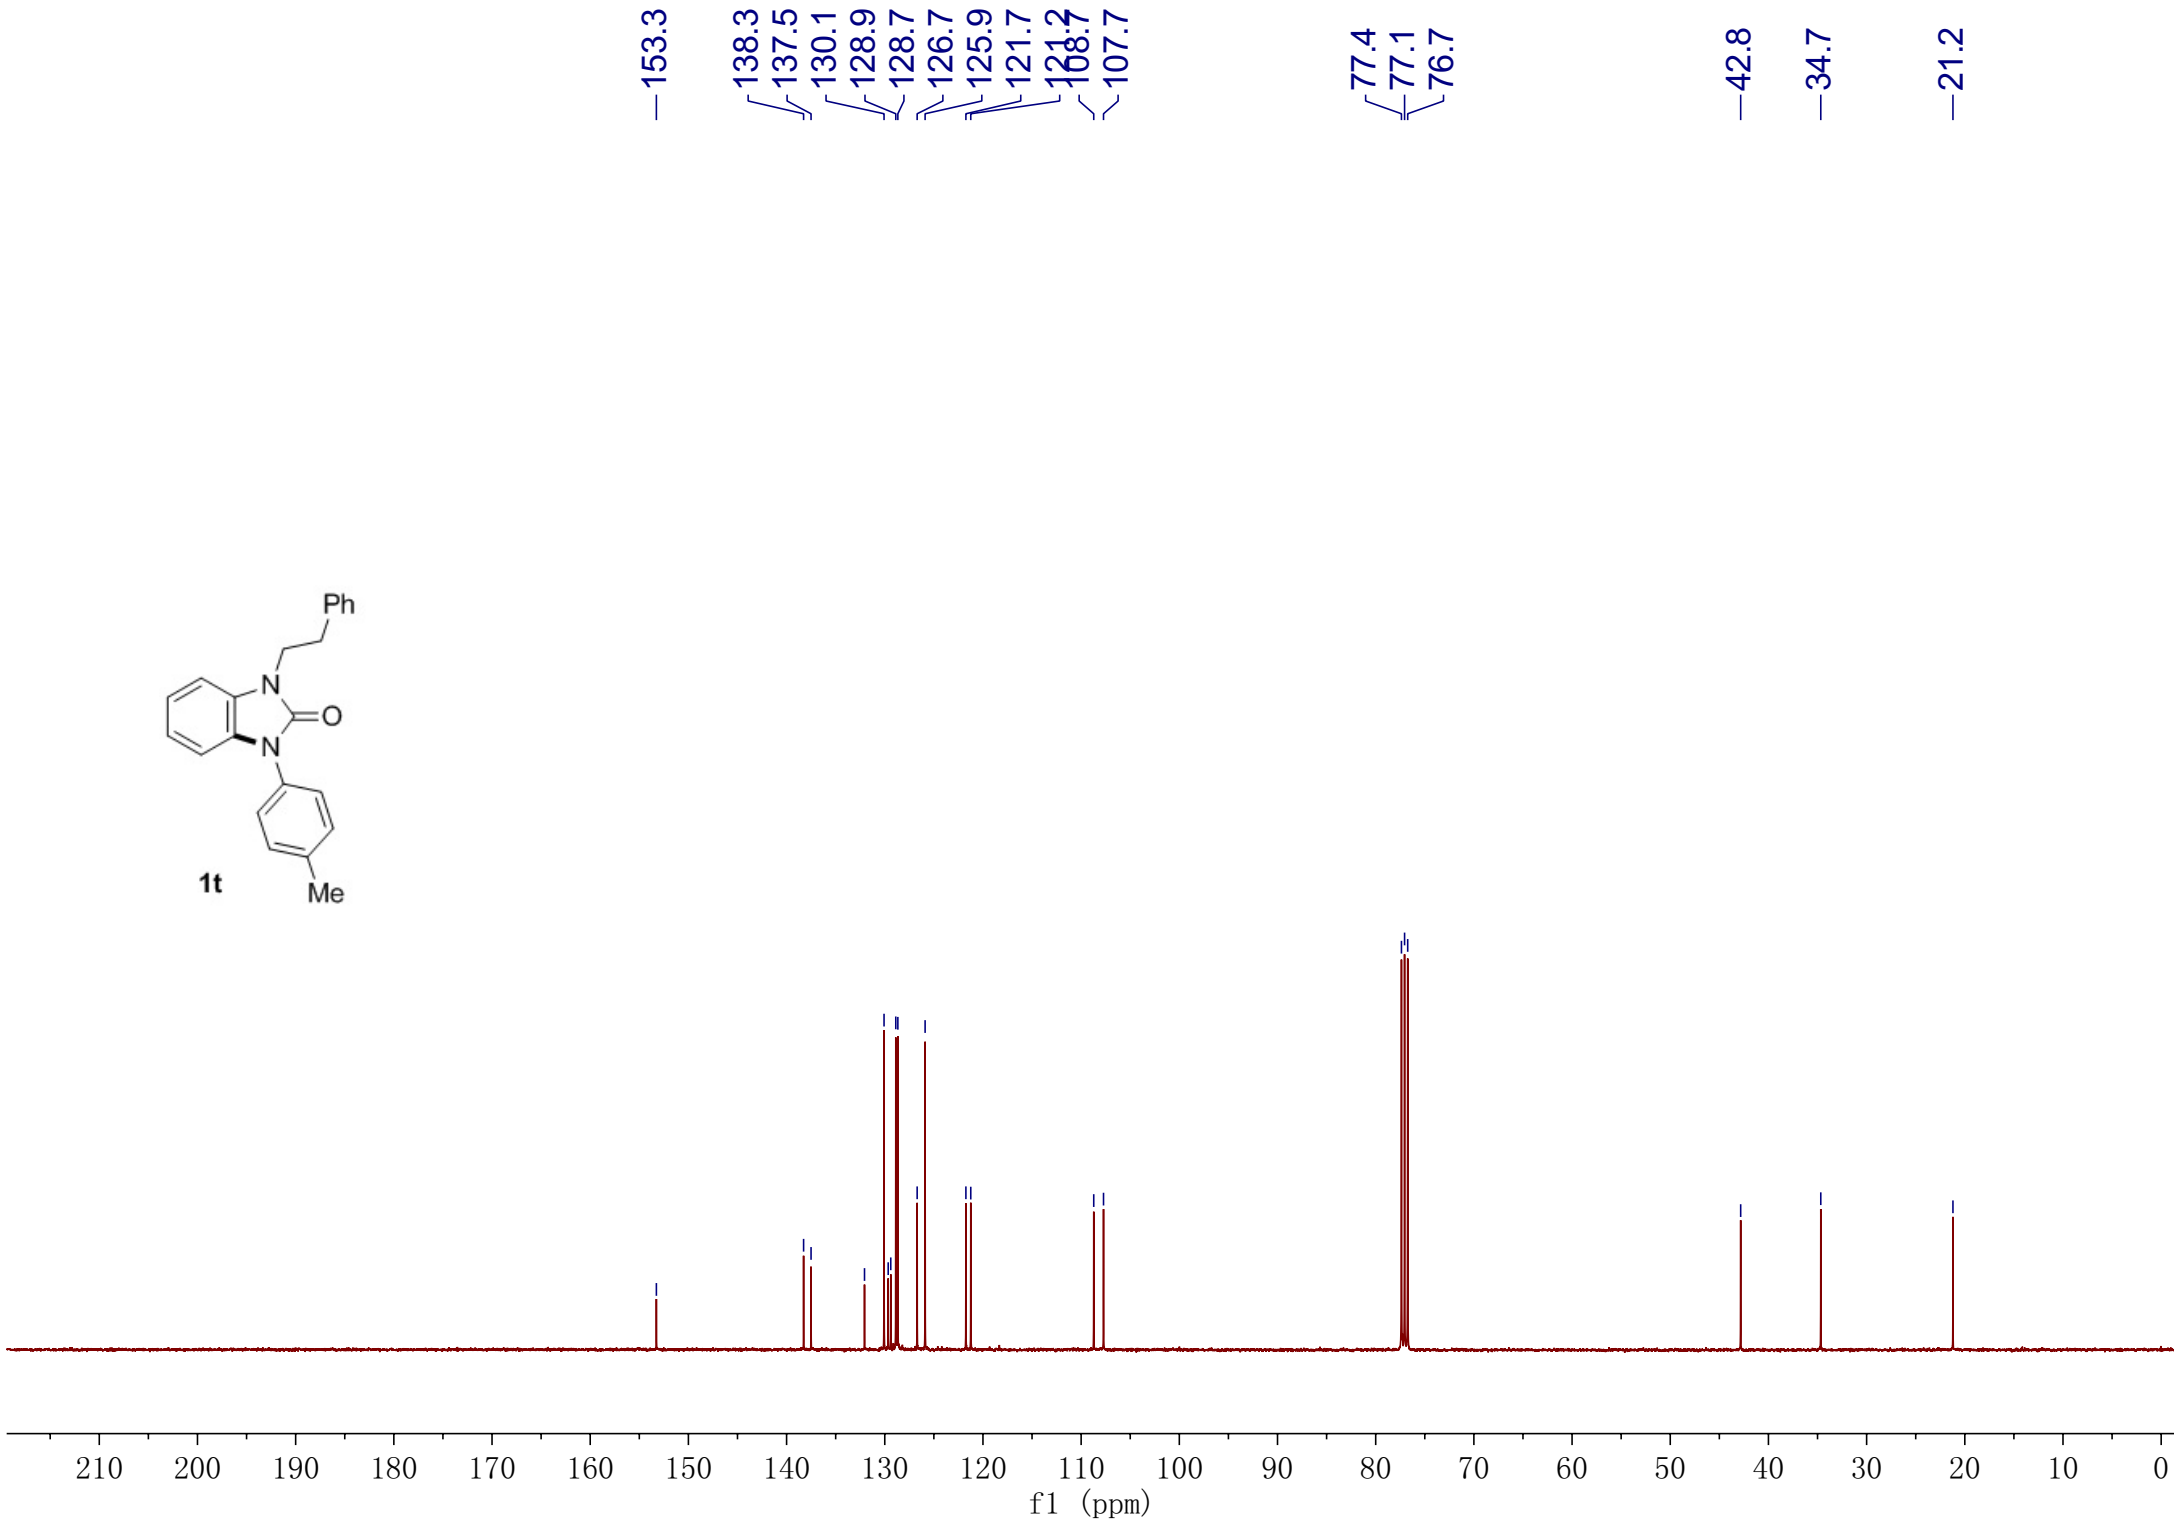

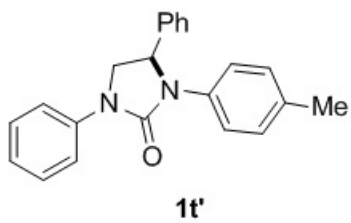

7.782  
7.763  
7.395  
7.386  
7.373  
7.366  
7.344  
7.239  
7.064

5.579  
5.559  
5.541

4.353  
4.332  
4.311  
3.942  
3.923  
3.920  
3.901

-2.281

-0.000

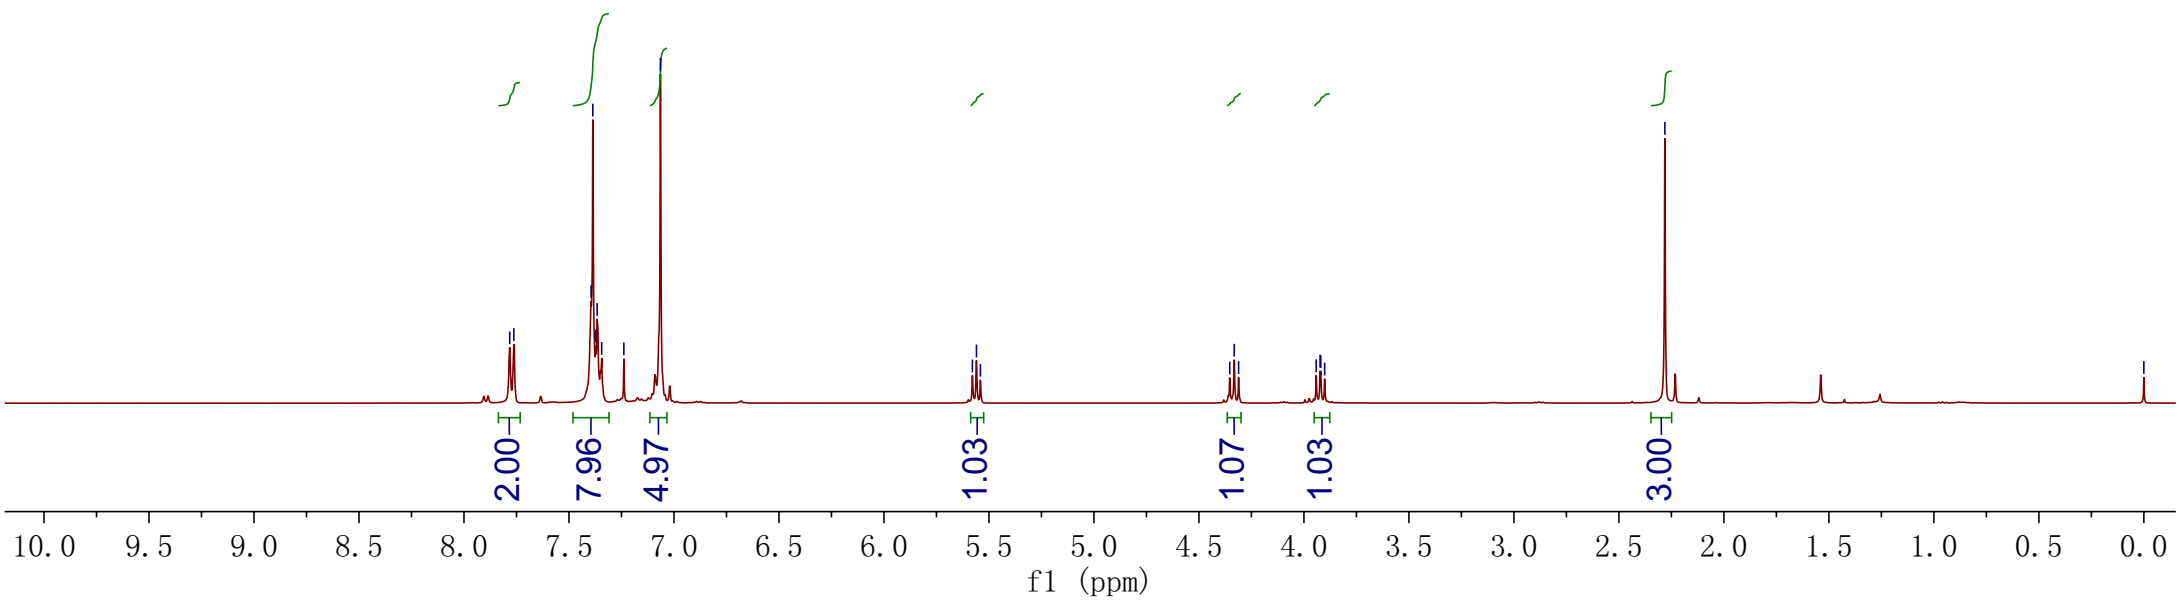

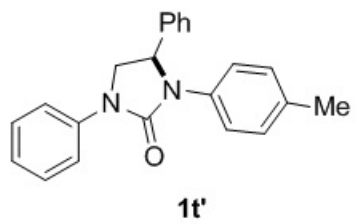

148.5  
144.4  
139.7  
138.5  
131.7  
129.2  
128.9  
128.9  
128.8  
125.9  
123.2  
122.9  
118.8

77.4  
77.0  
76.7  
76.4

53.8

20.9

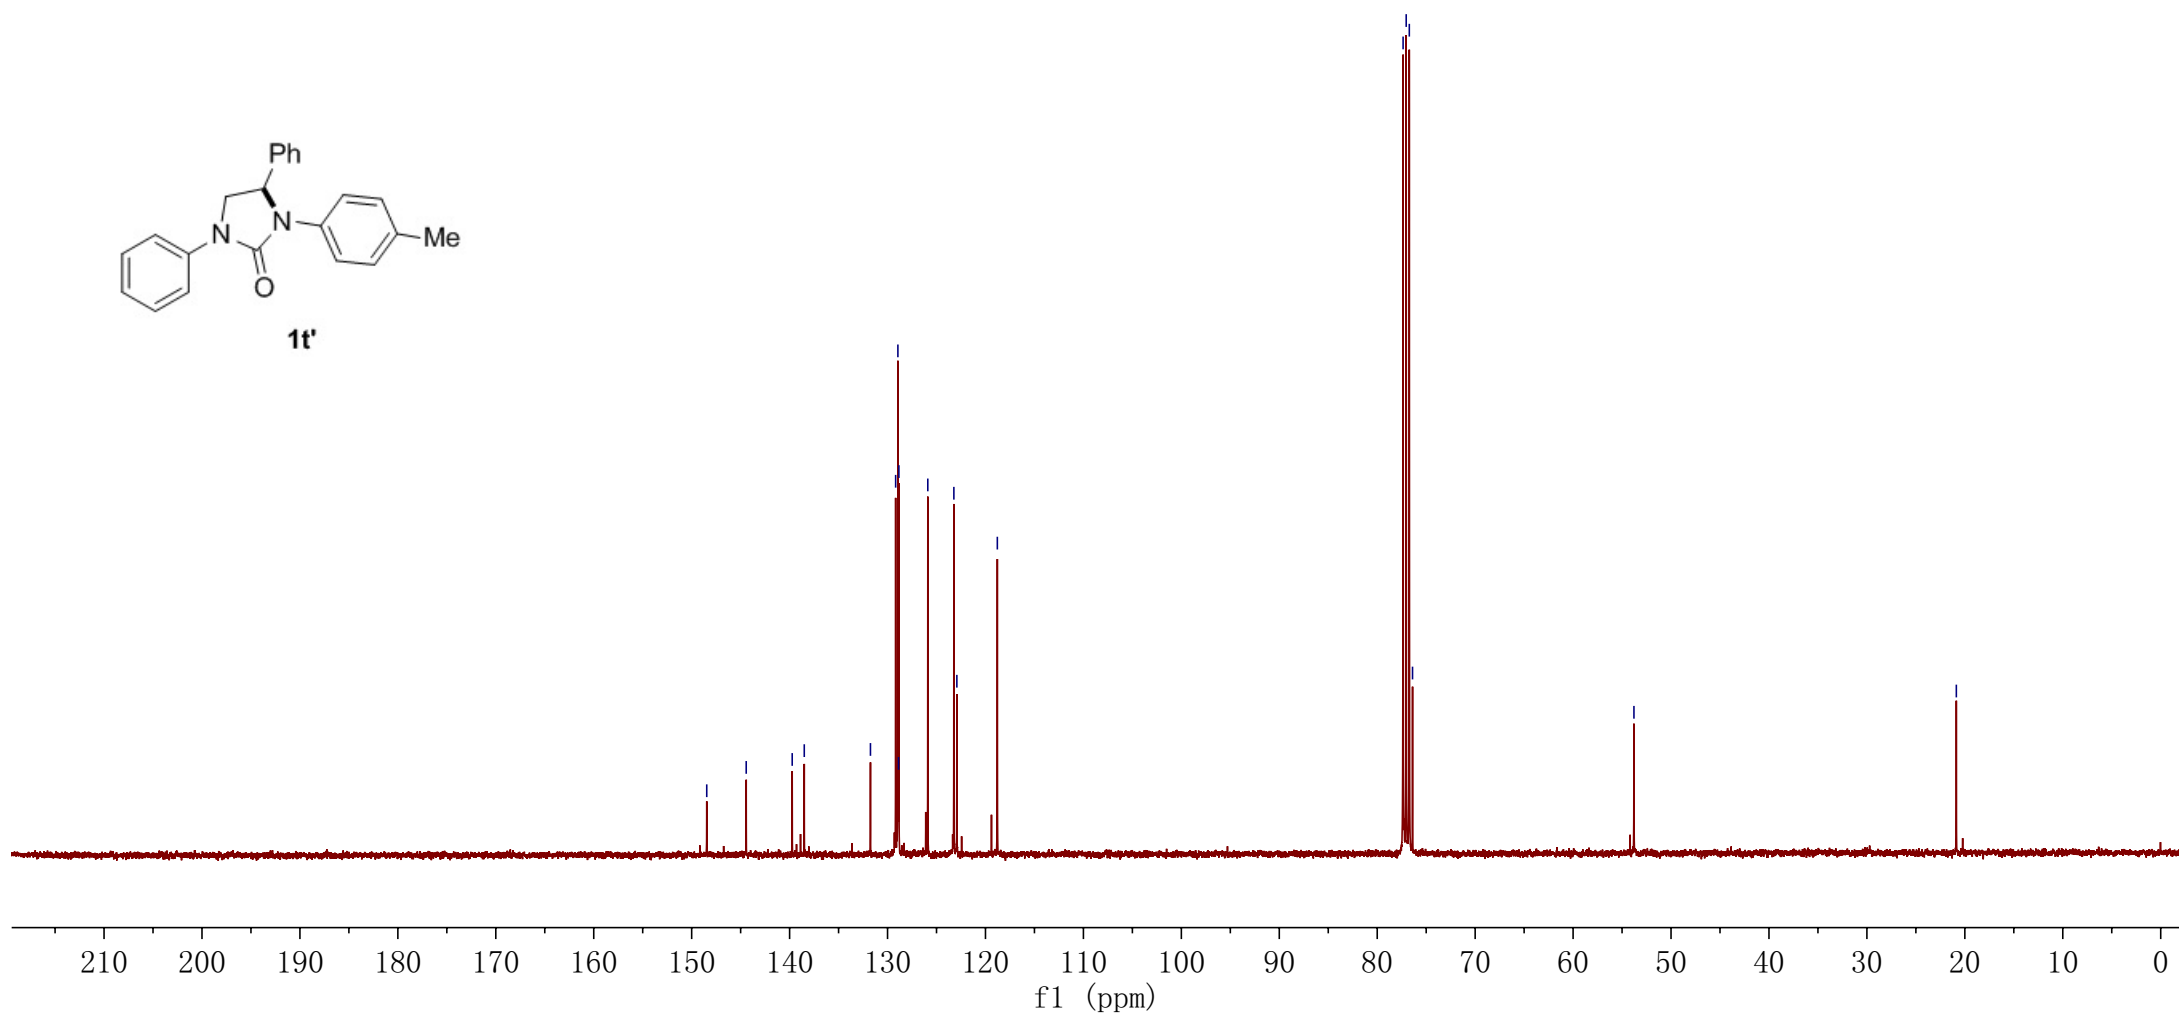

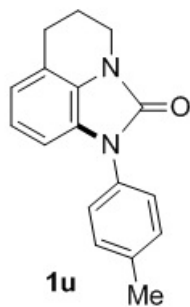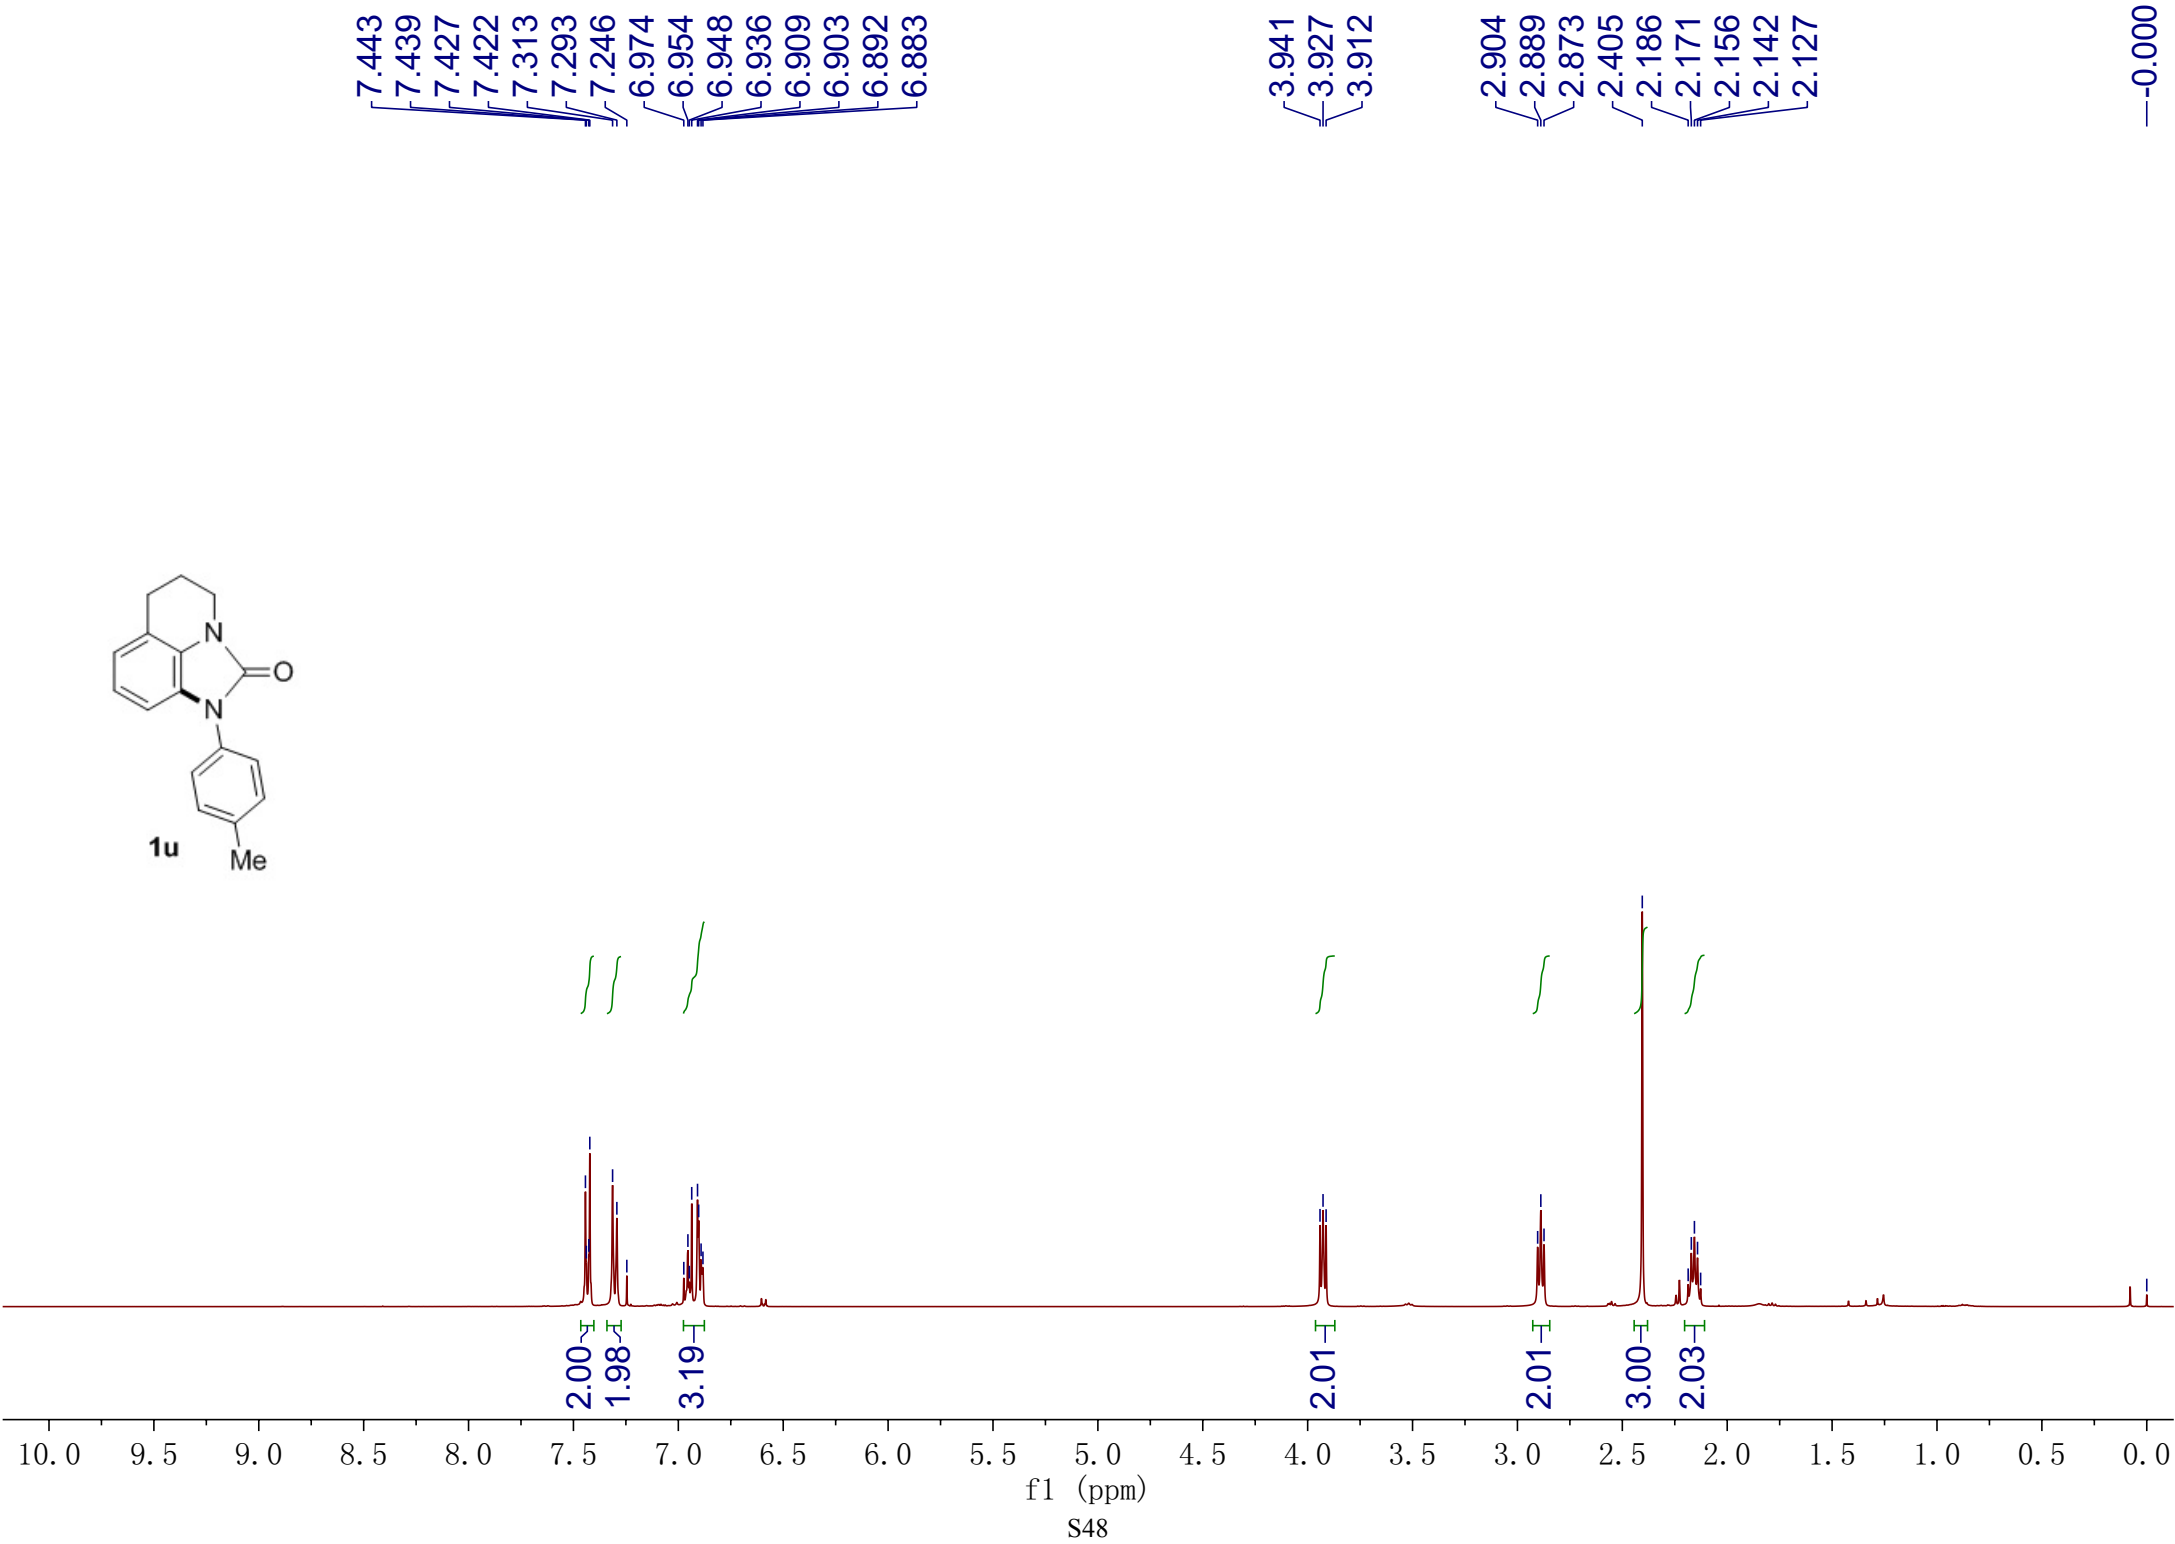

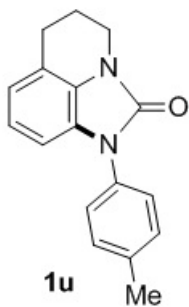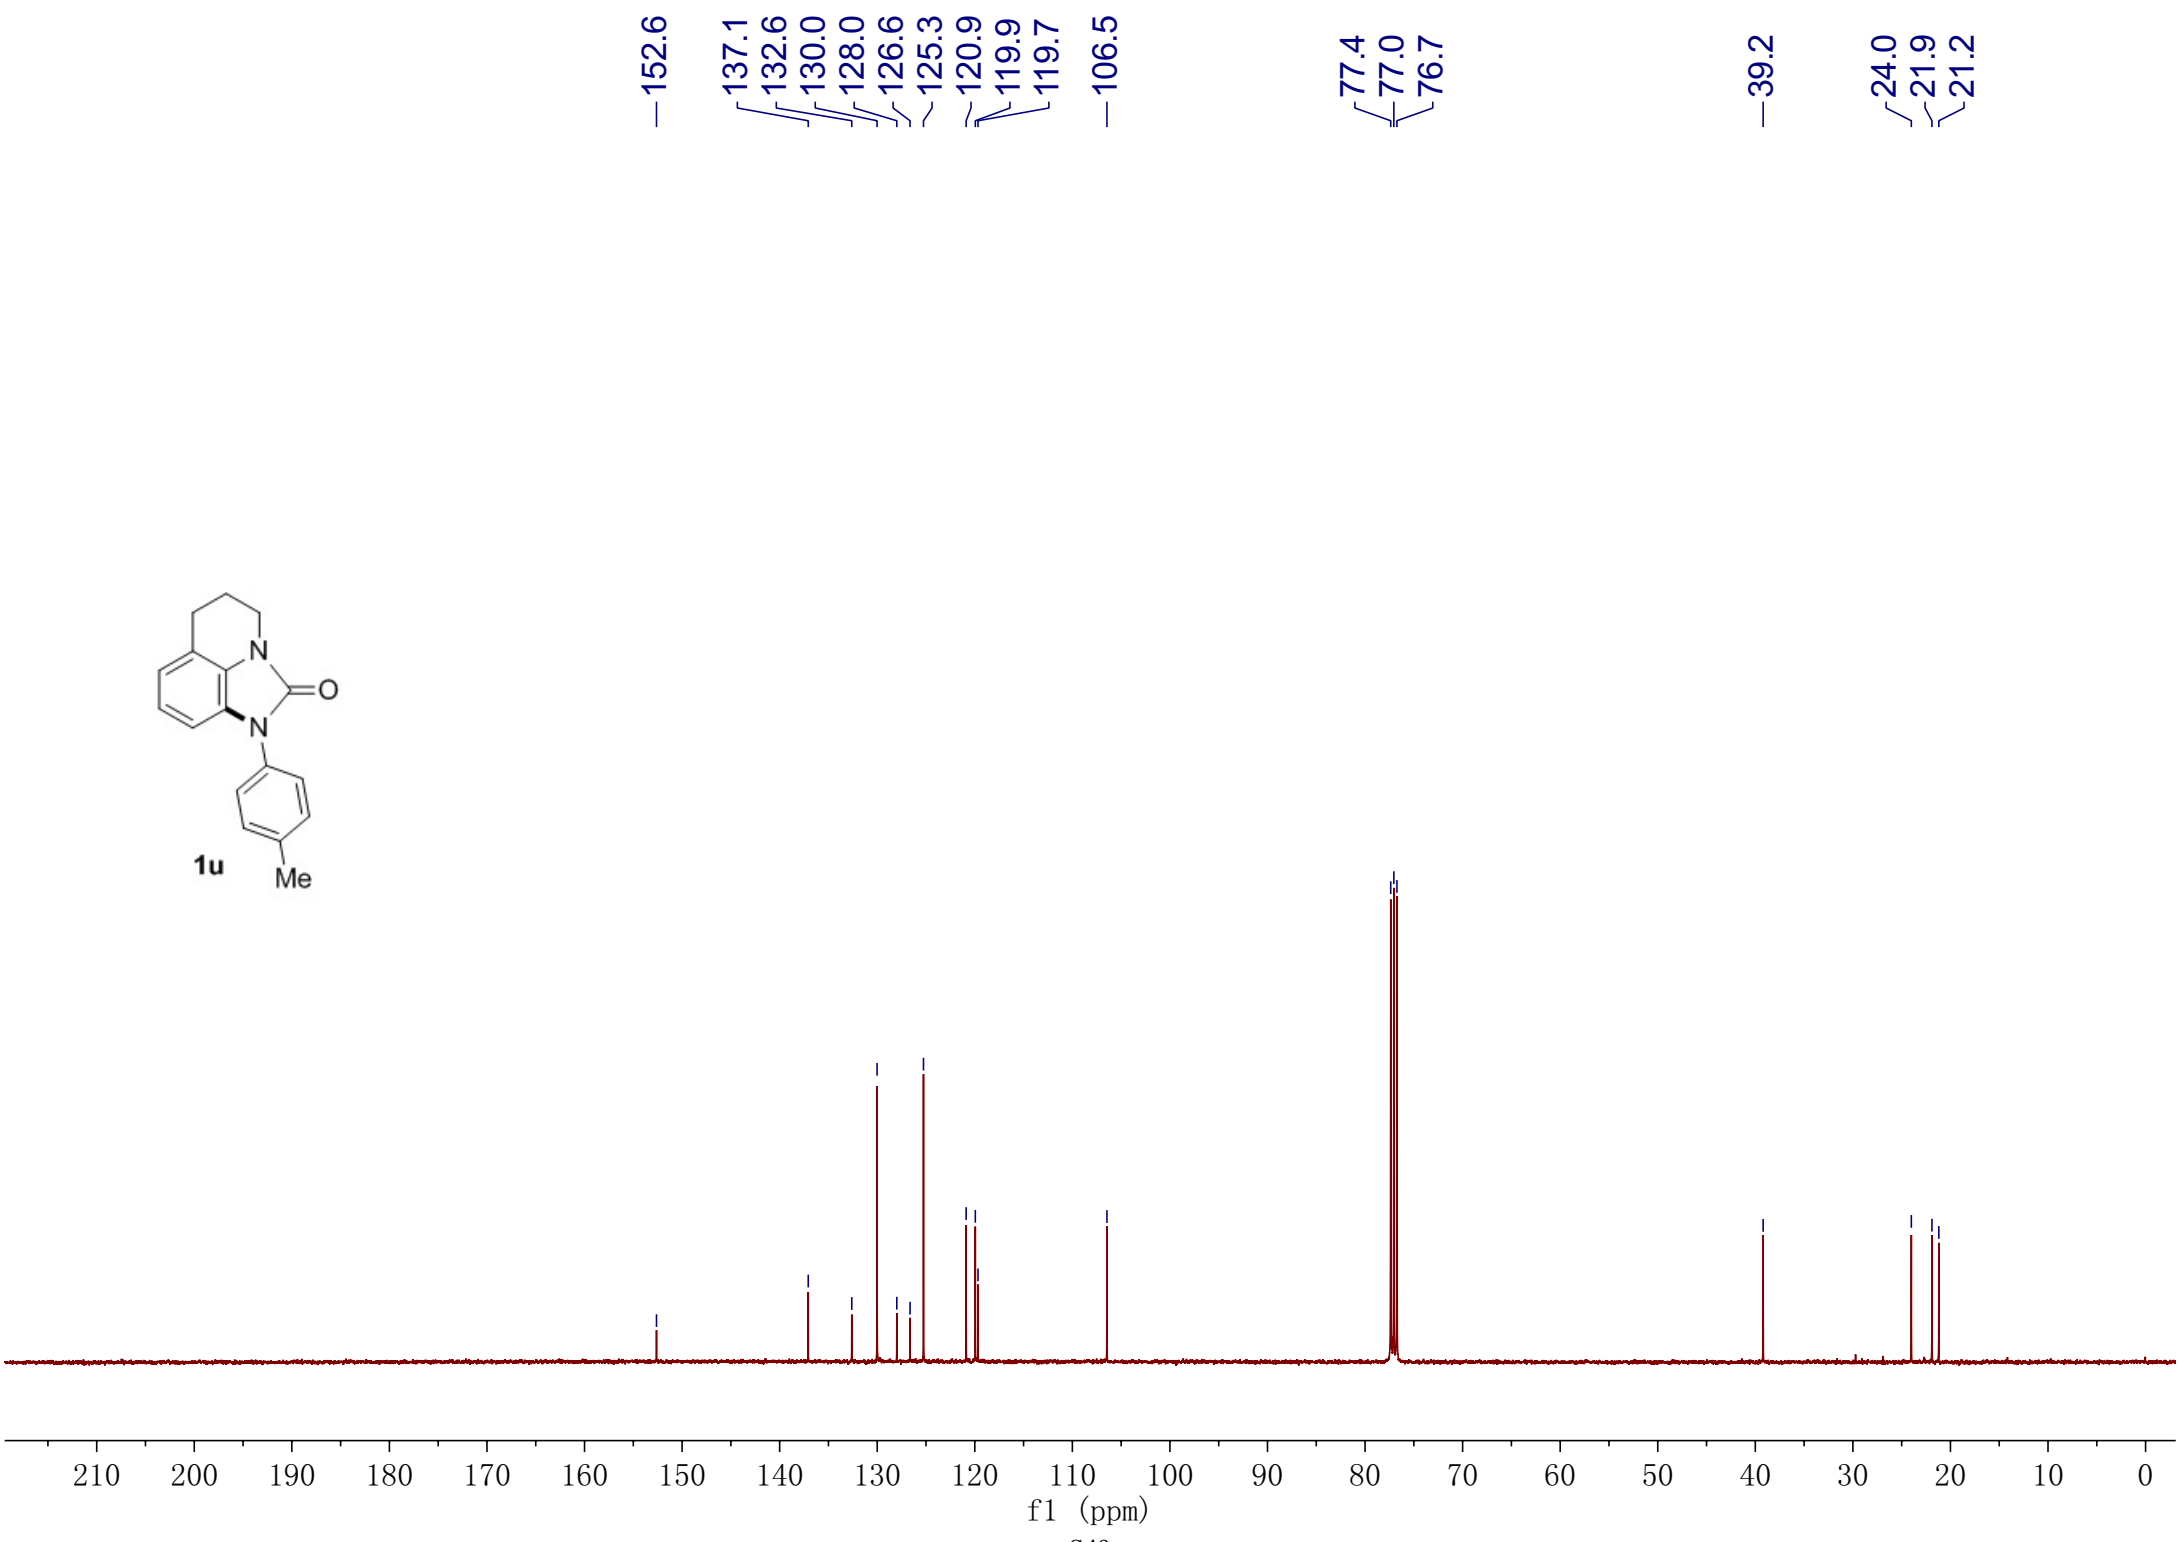

f1 (ppm)

S49

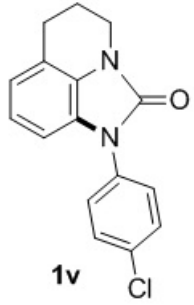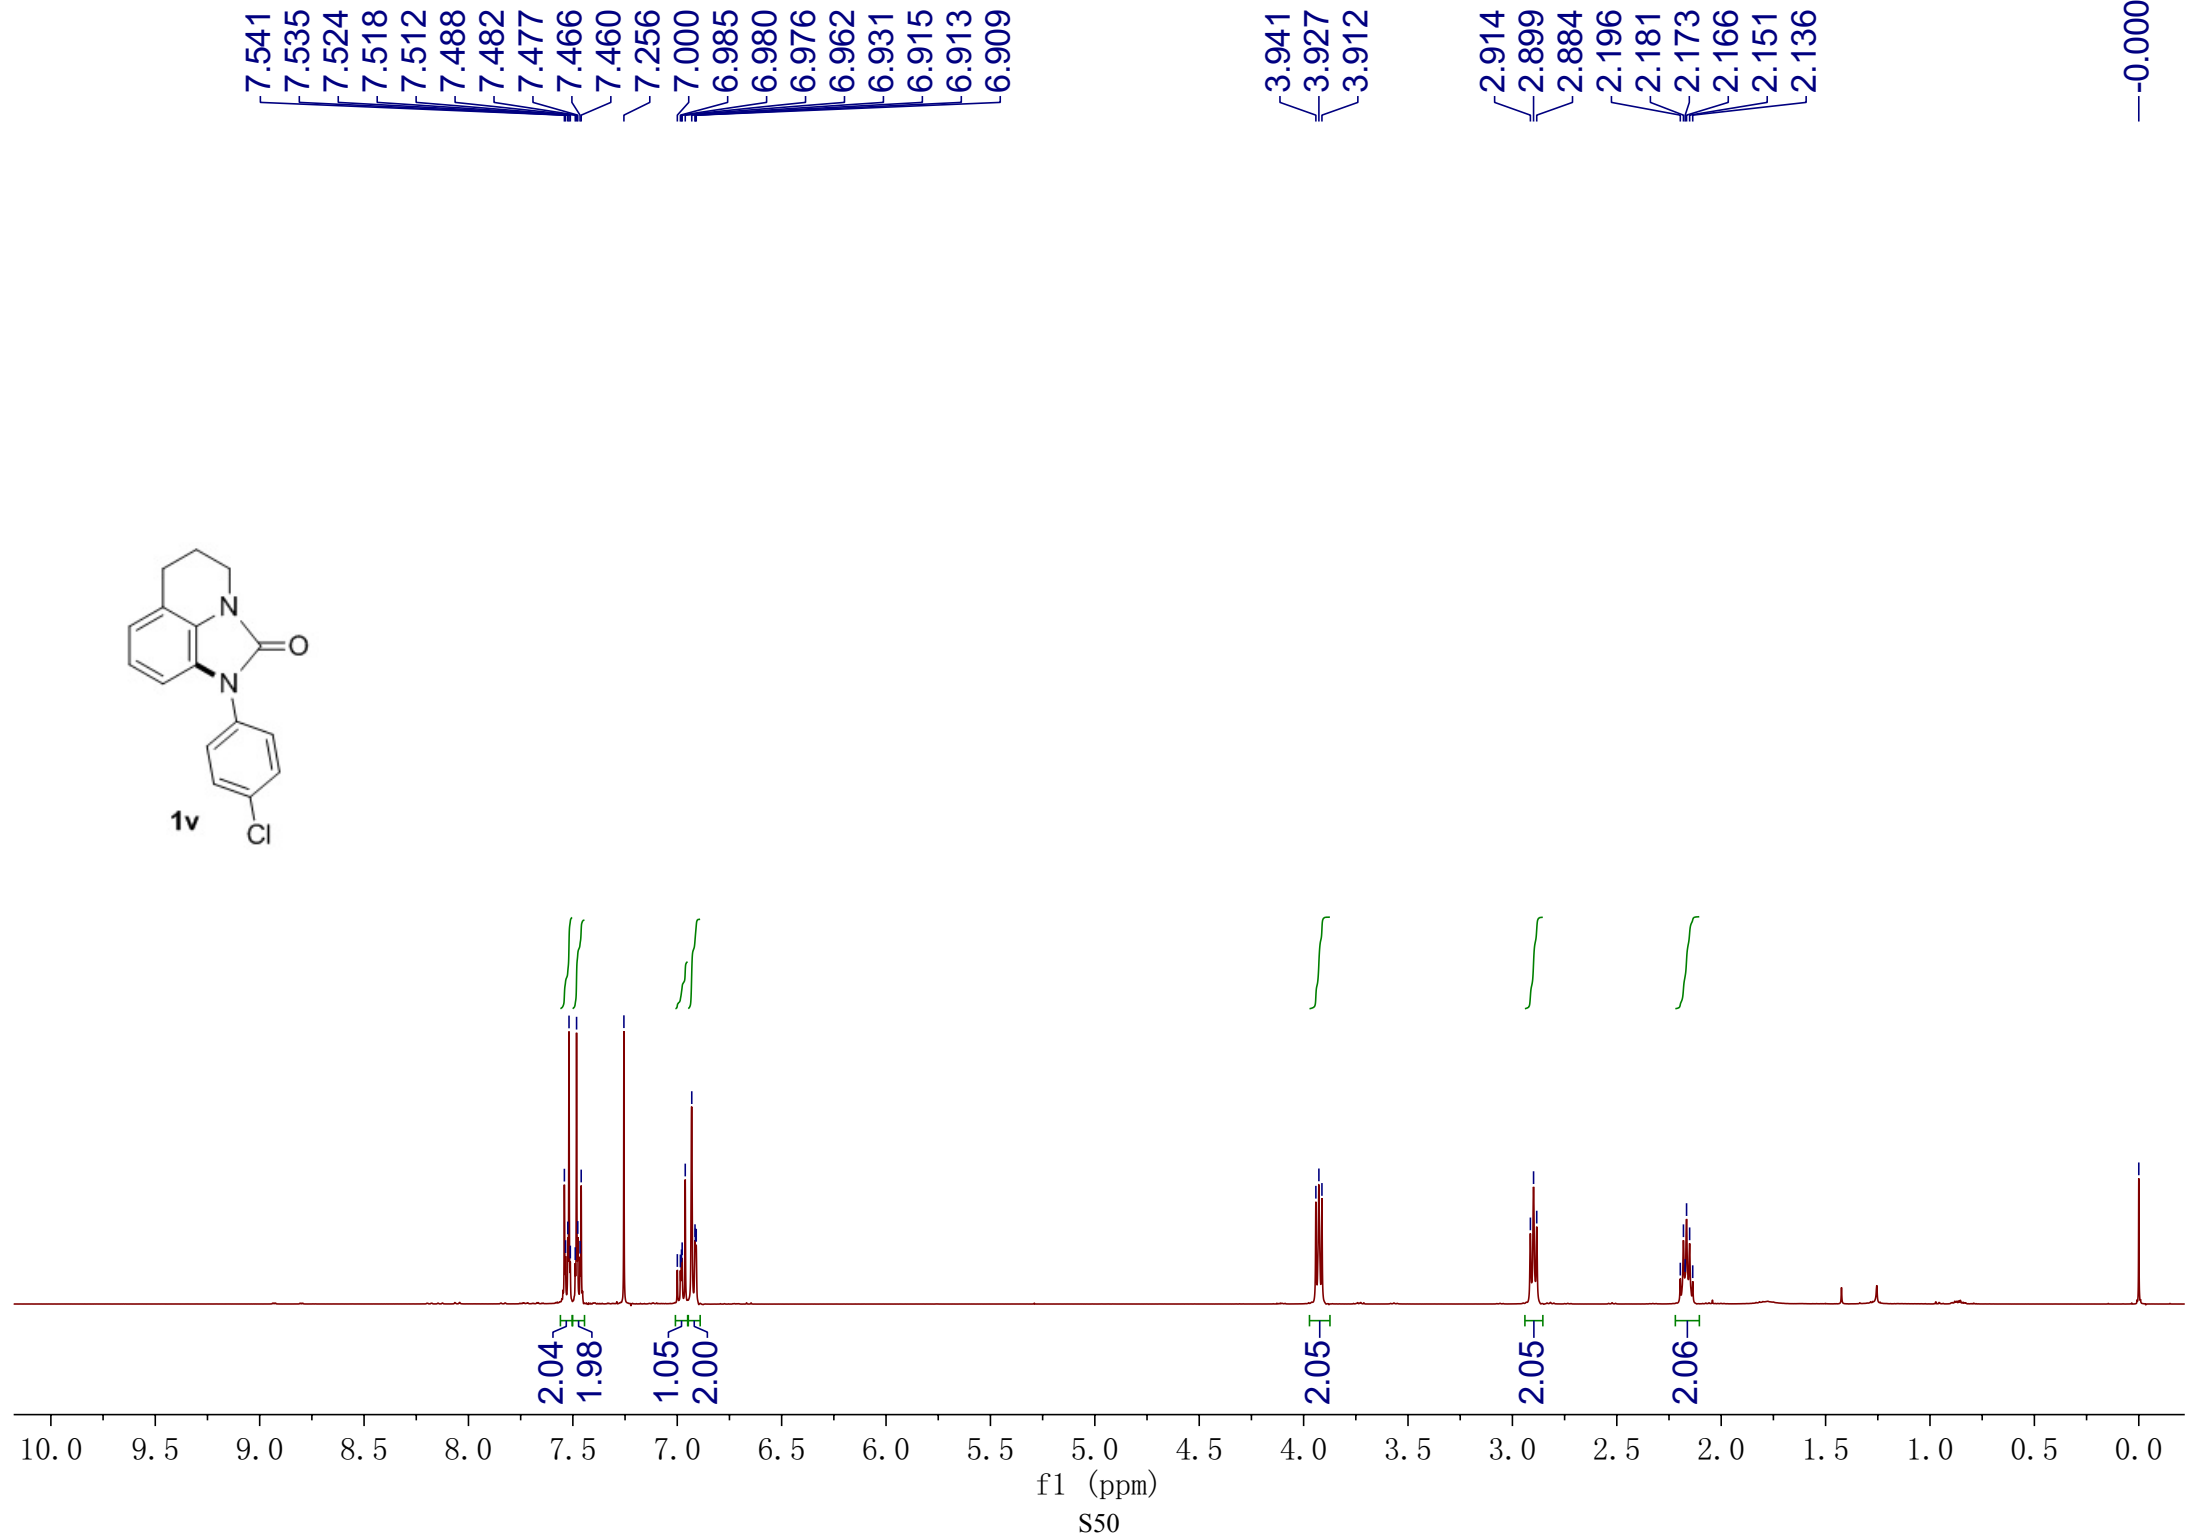

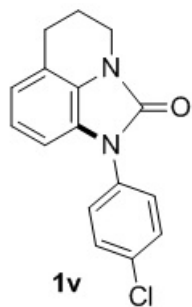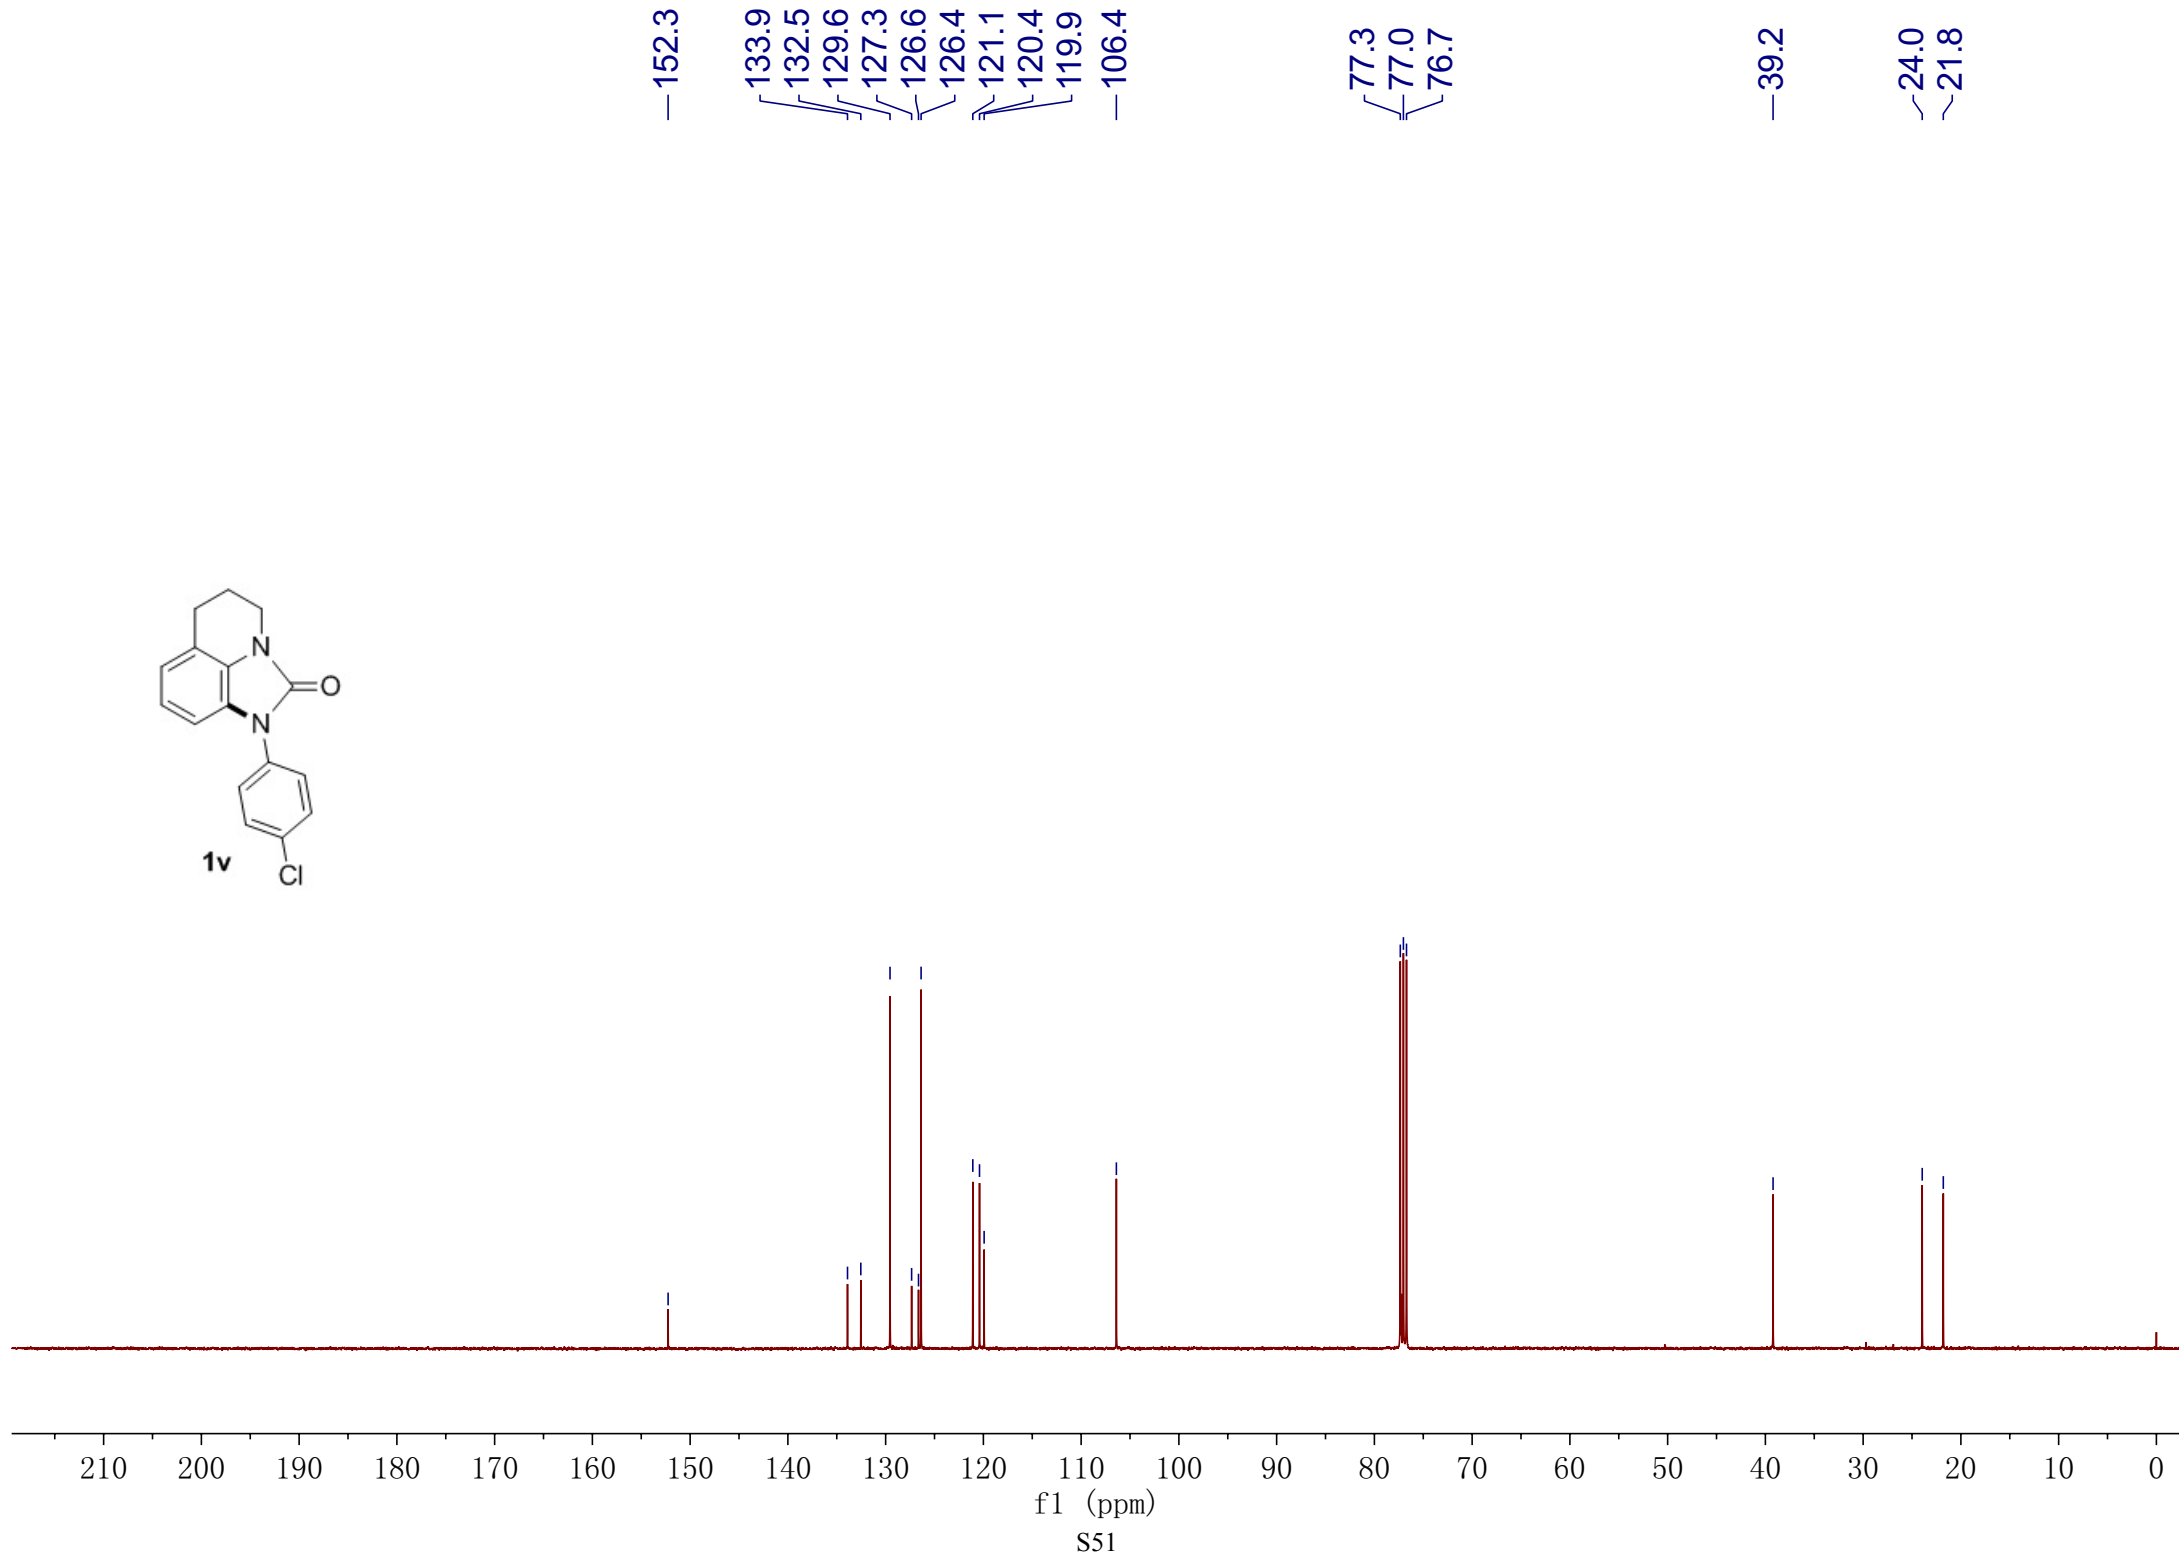

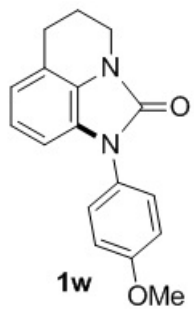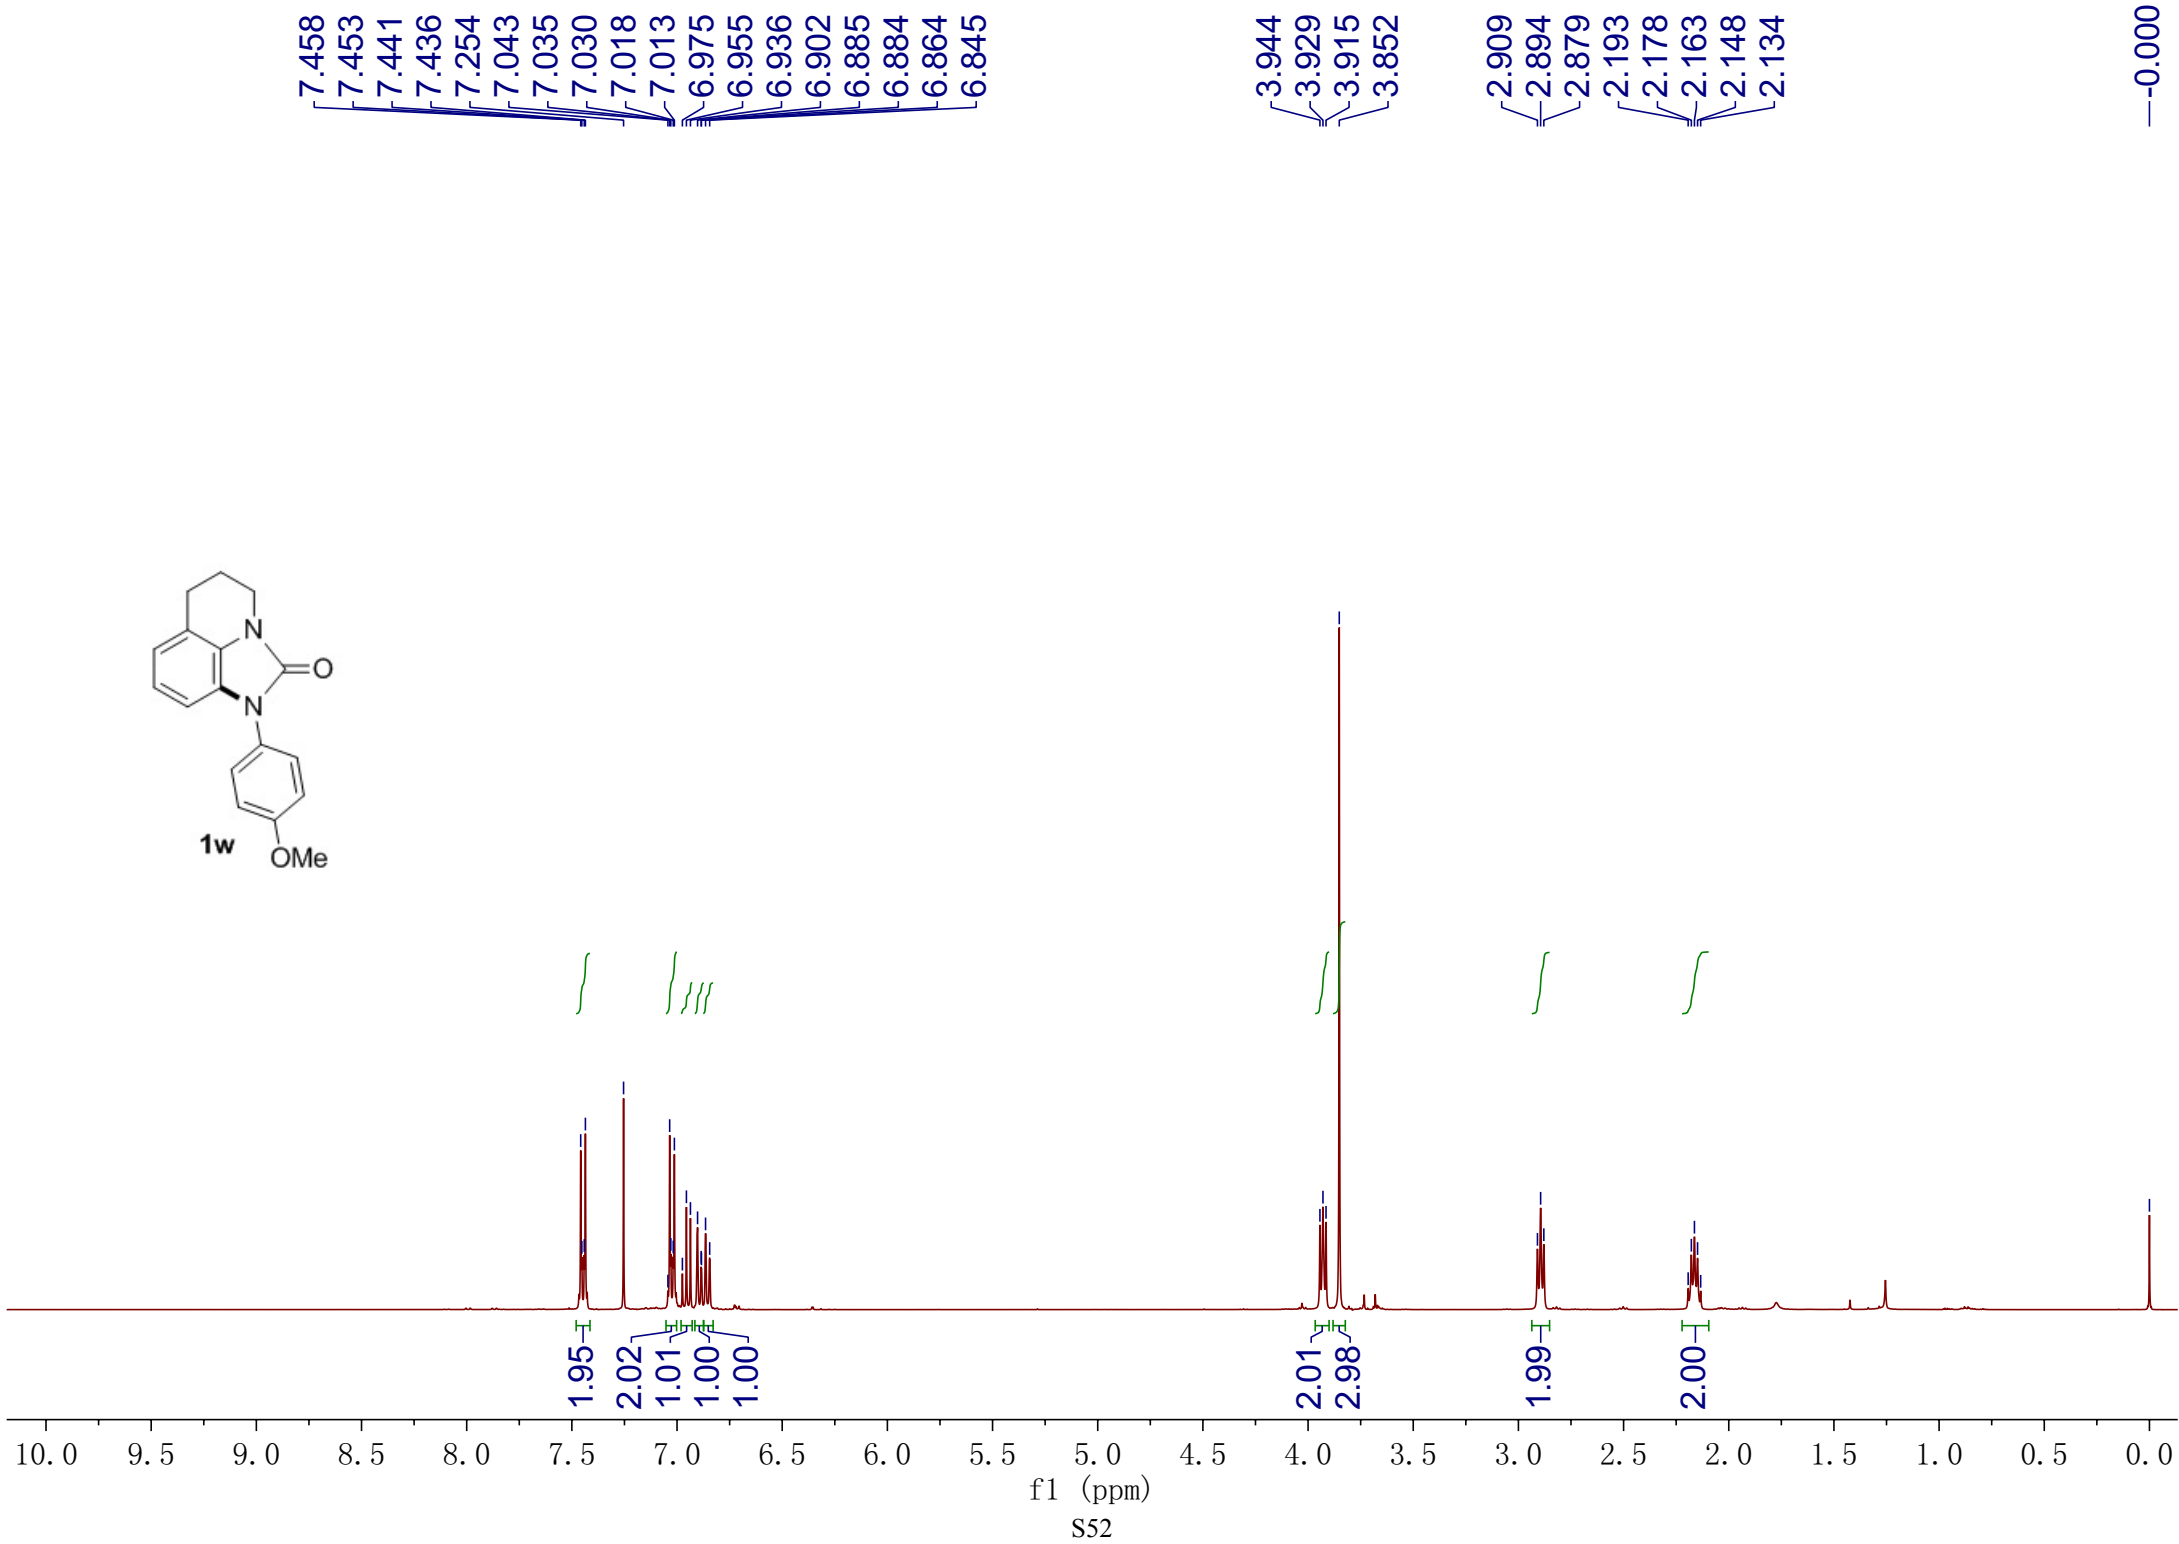



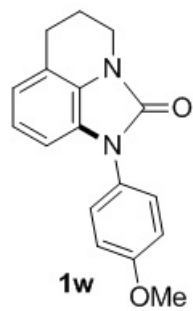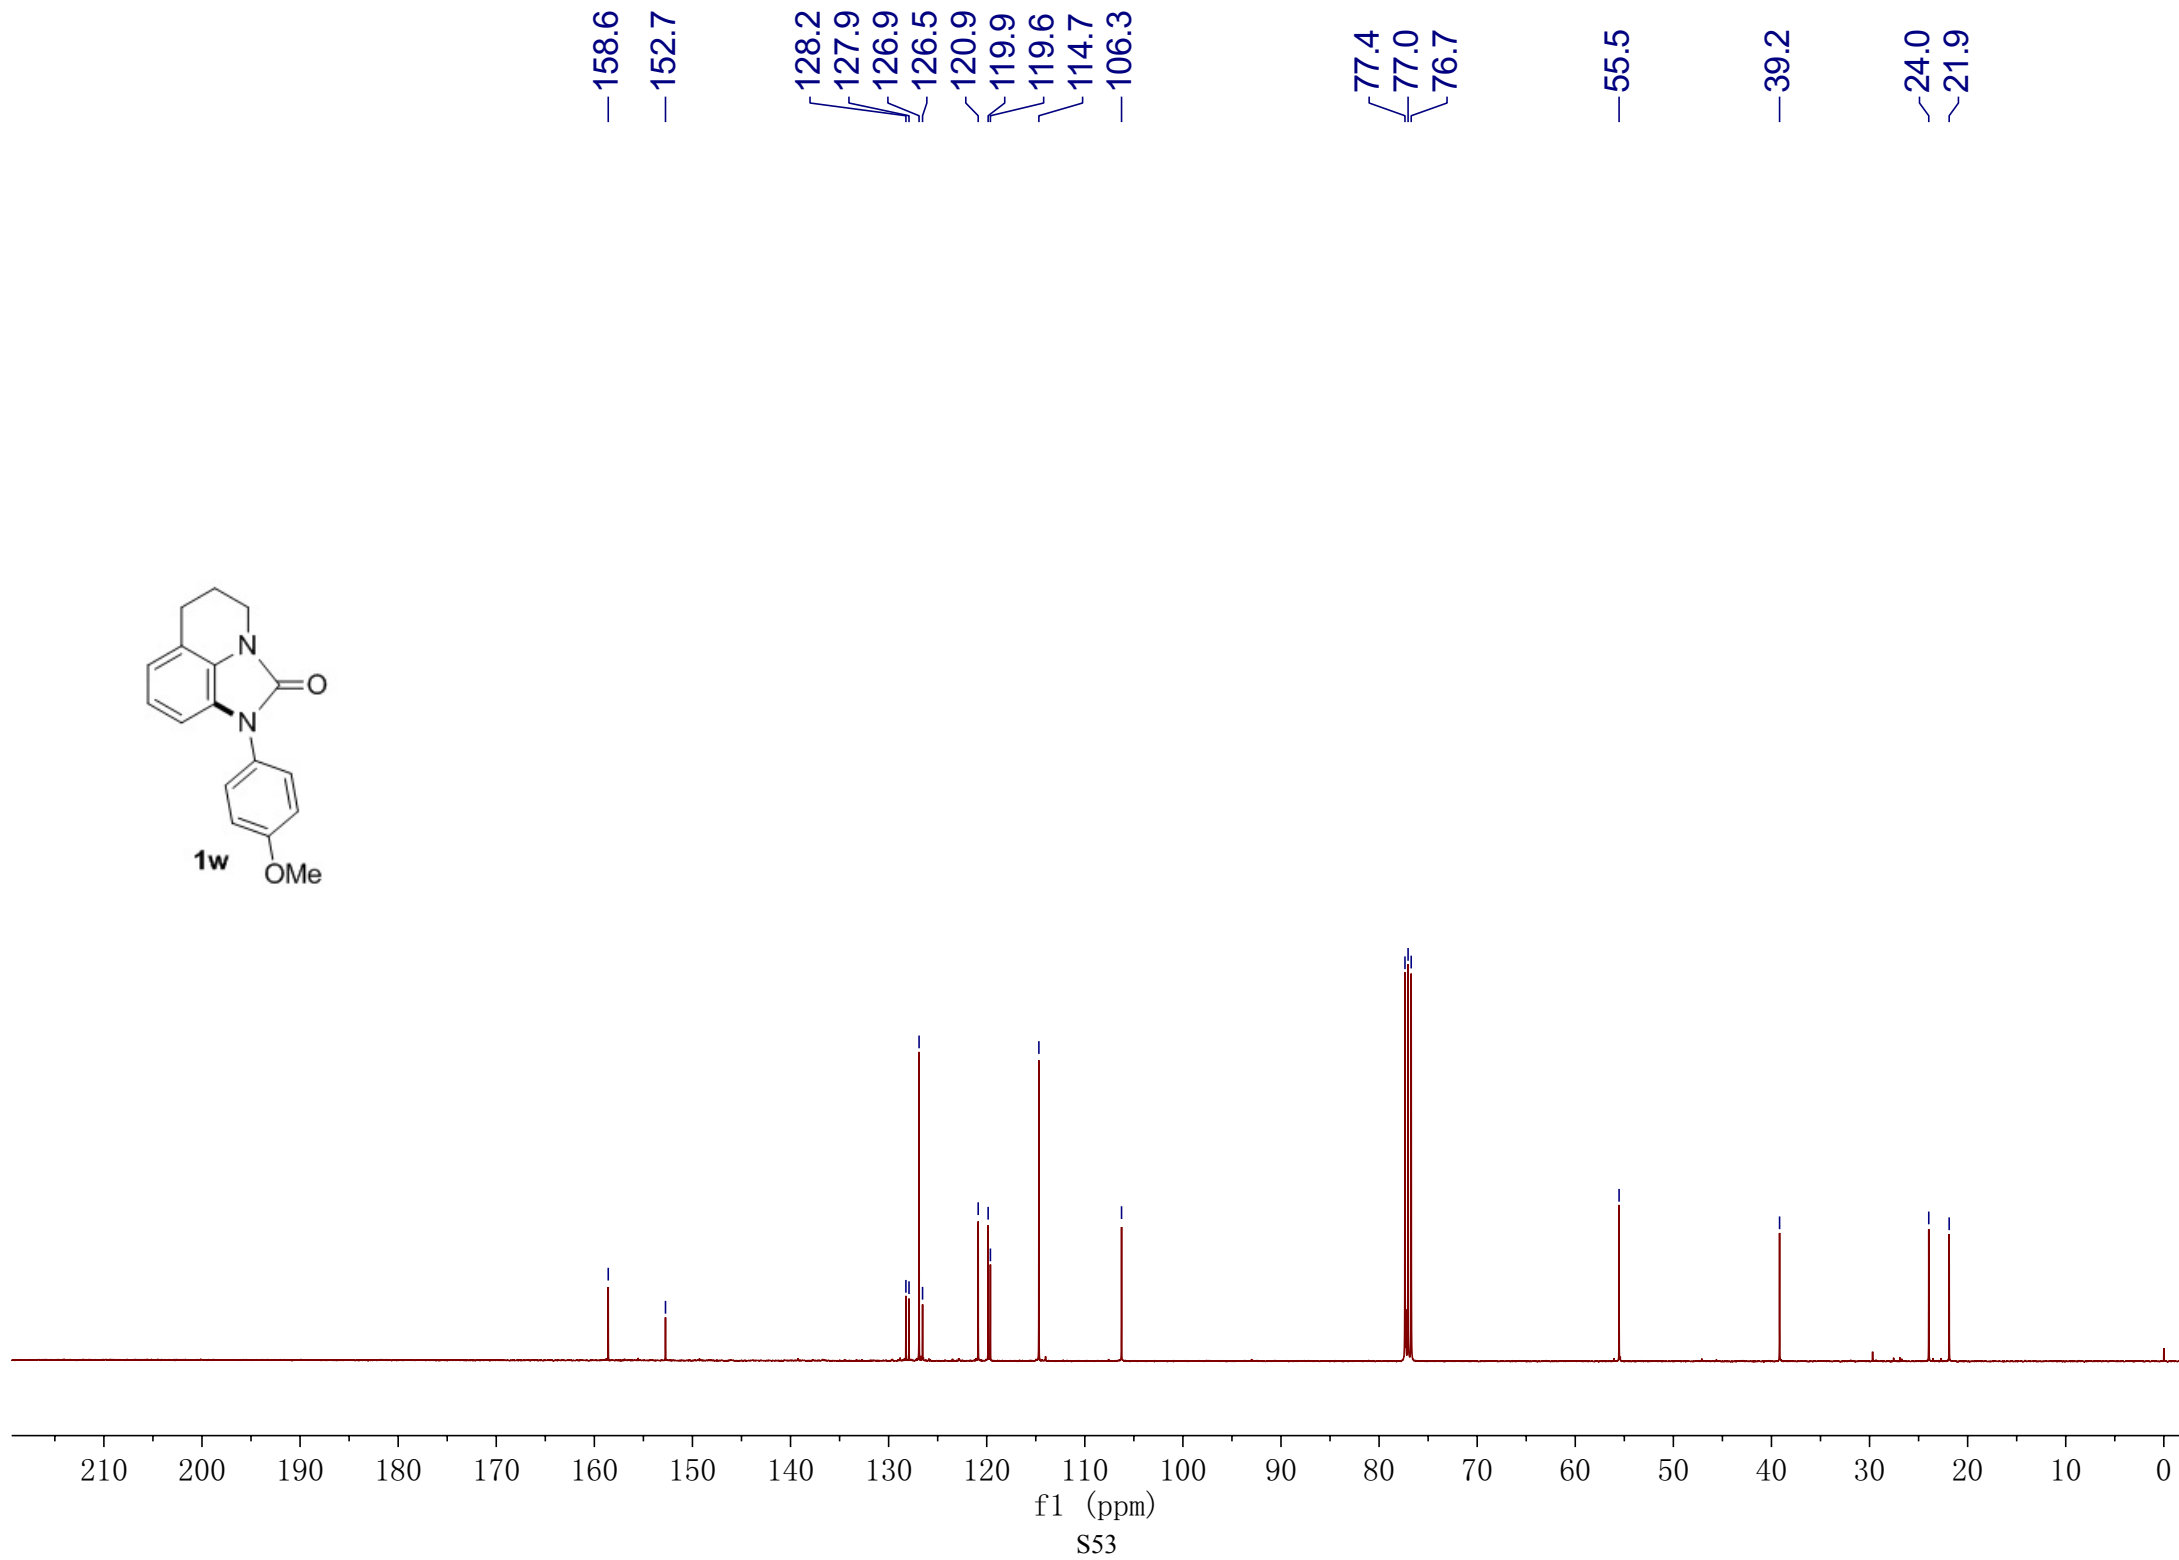

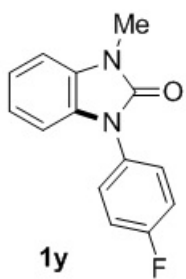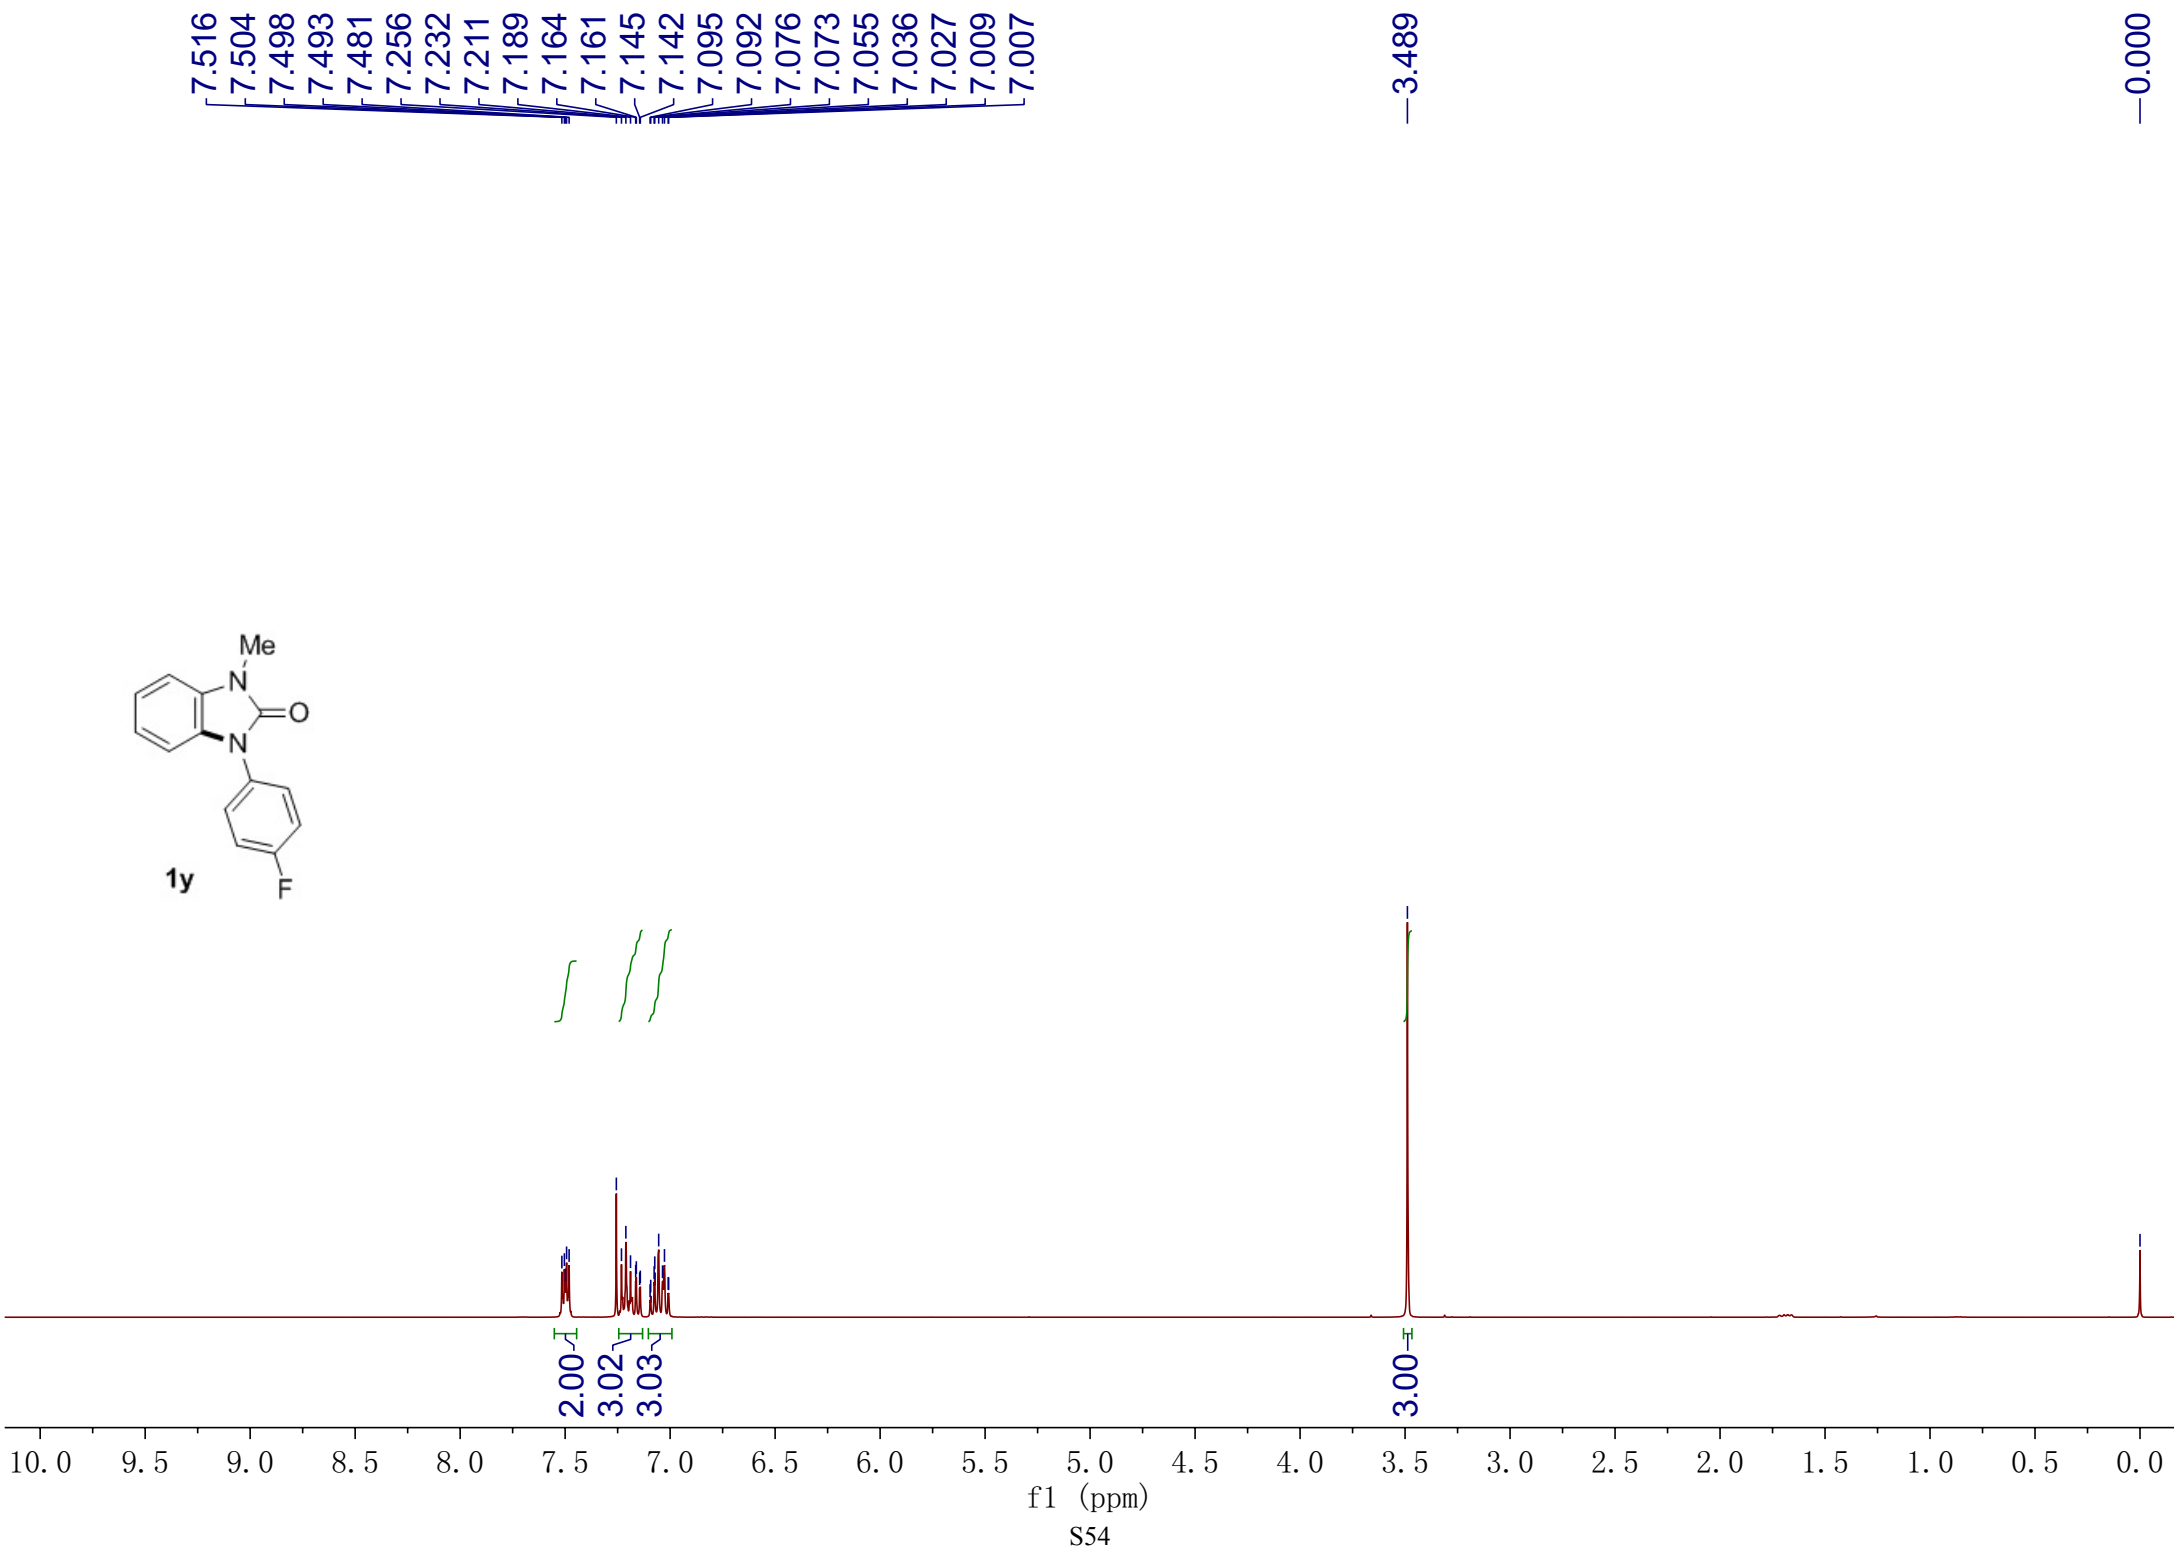

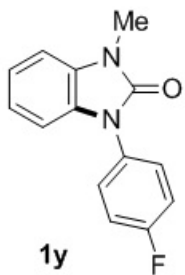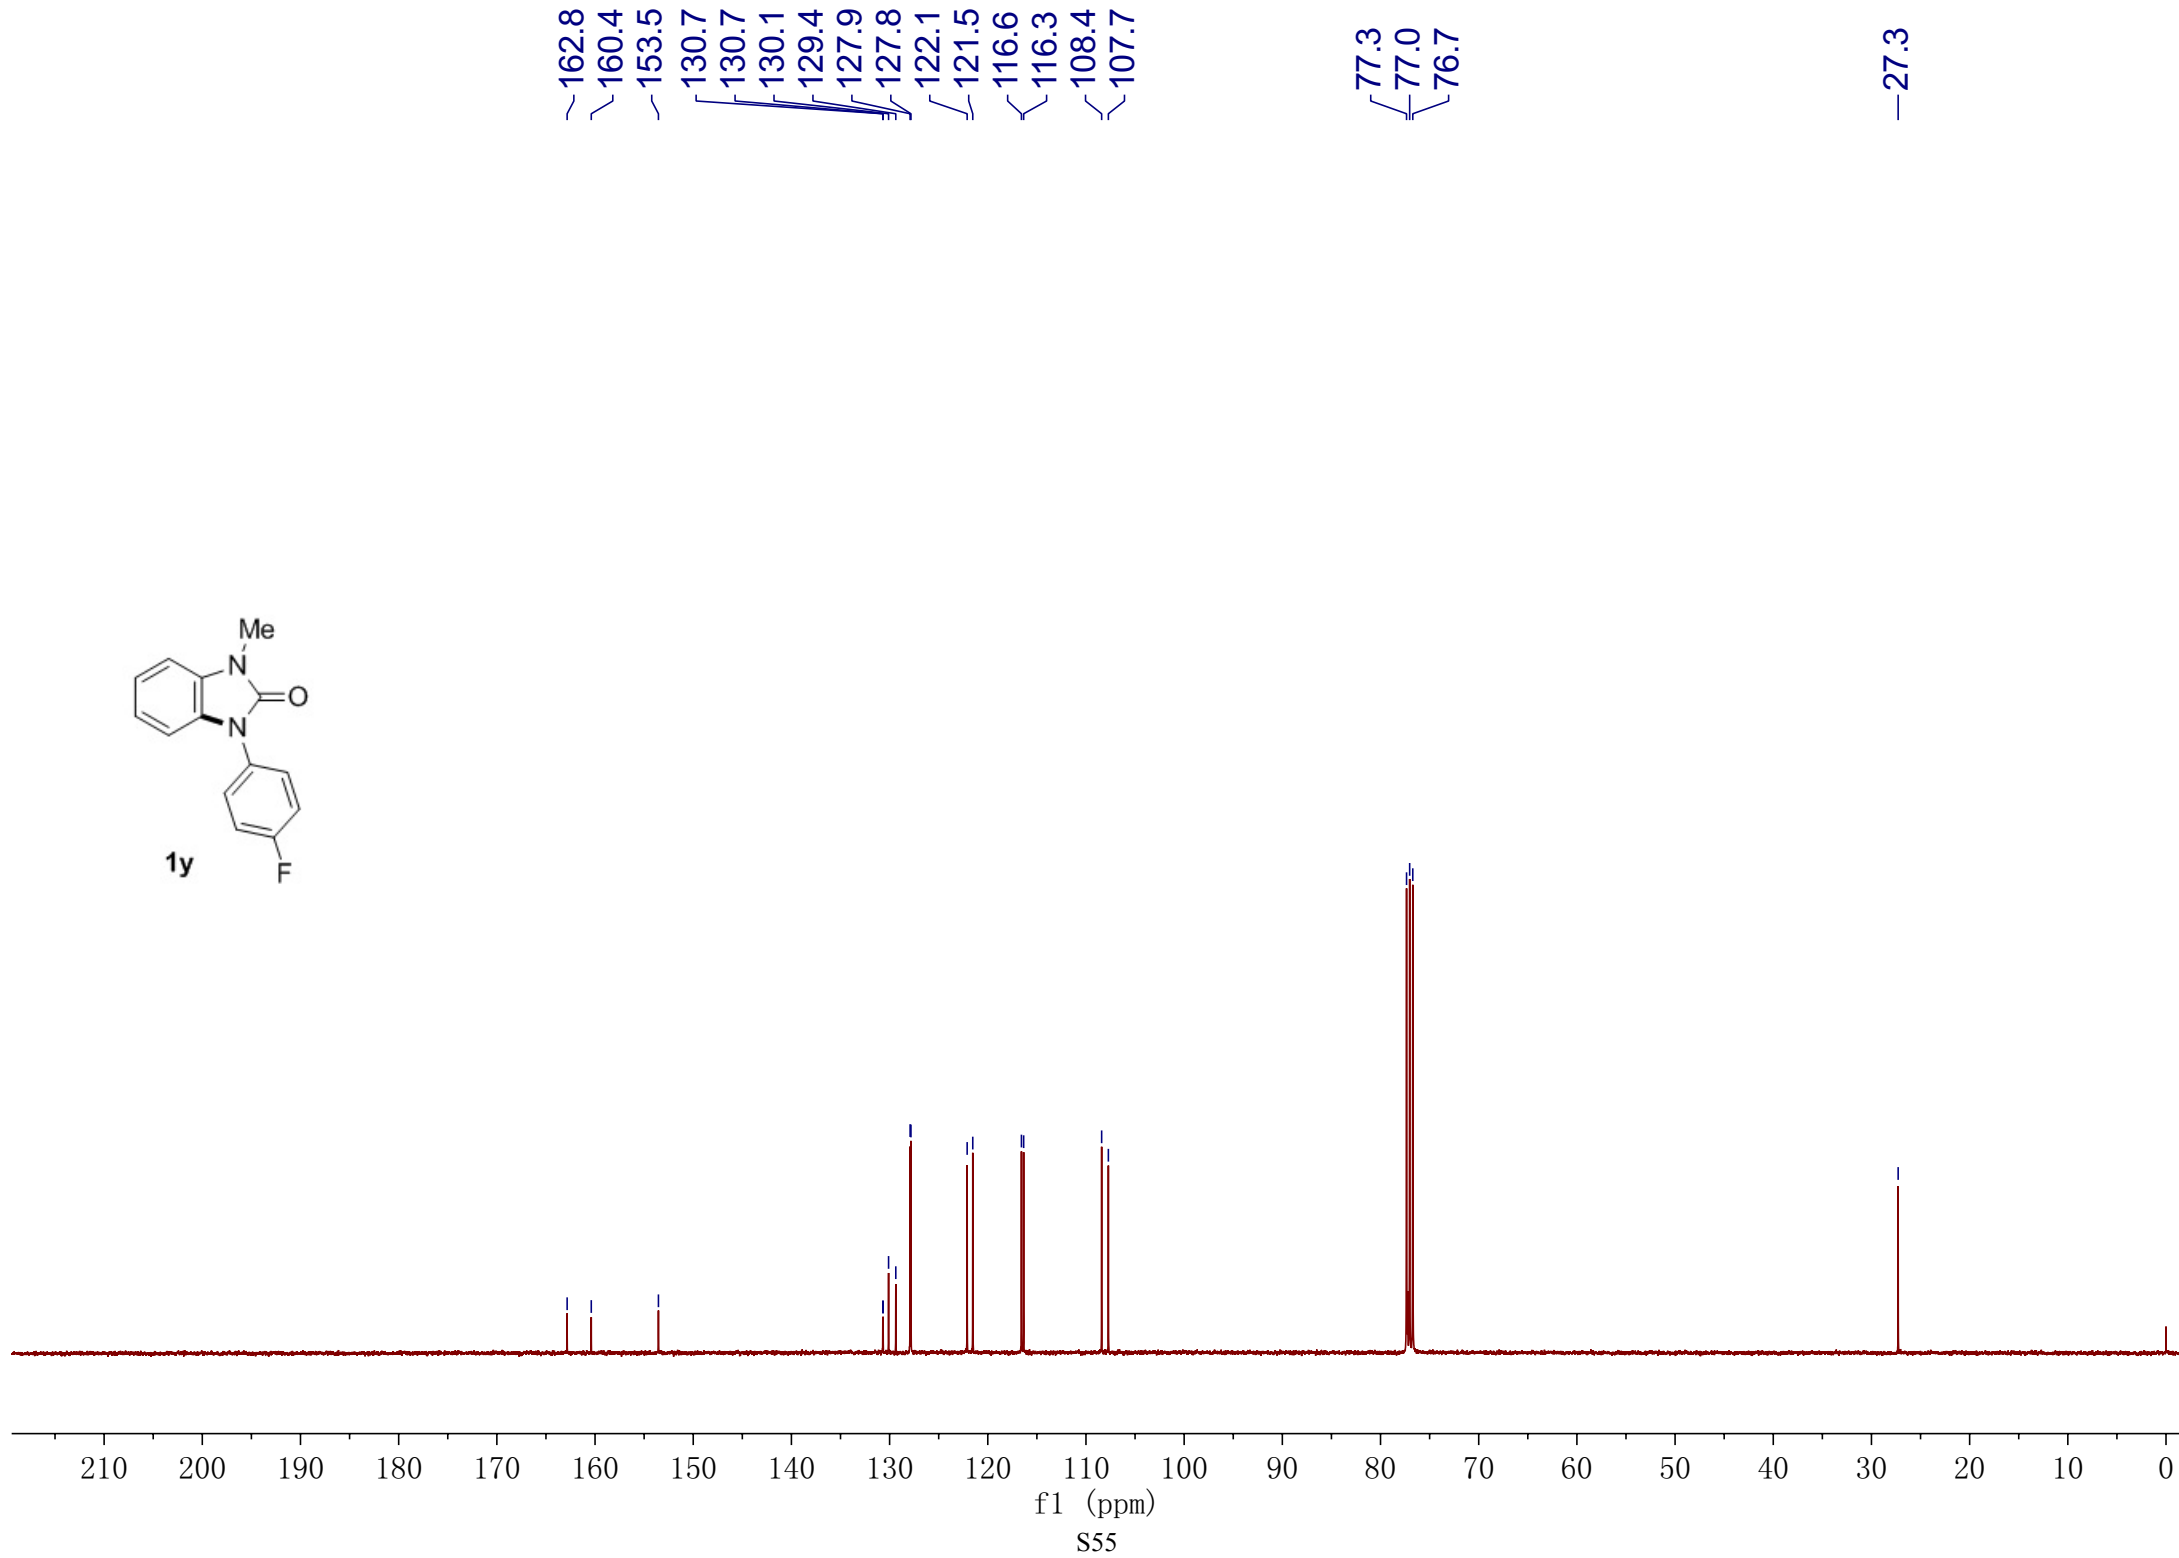

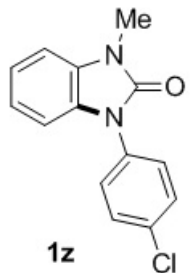

7.493  
7.258  
7.191  
7.186  
7.174  
7.172  
7.169  
7.167  
7.155  
7.150  
7.105  
7.103  
7.085  
7.083  
7.069  
7.066  
7.060  
7.058  
7.051  
7.039

—3.489

—0.000

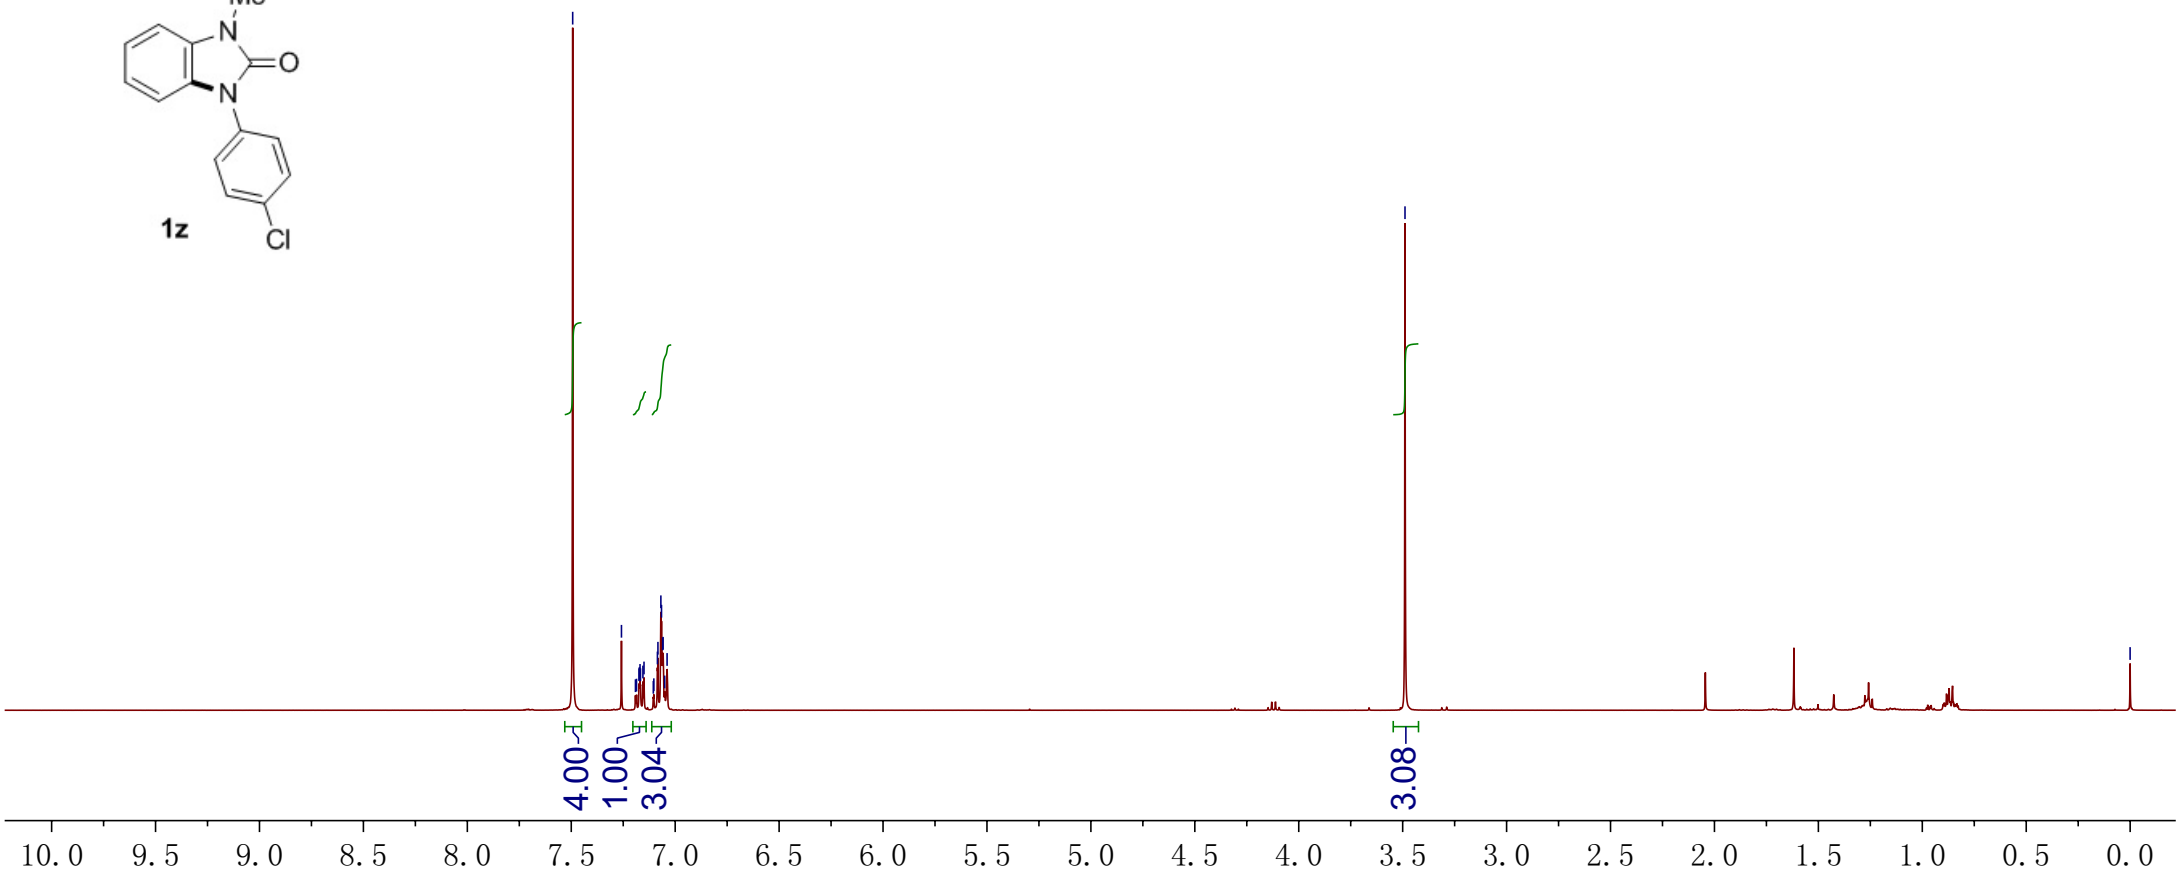

4.00  
1.00  
3.04

3.08

f1 (ppm)

S56

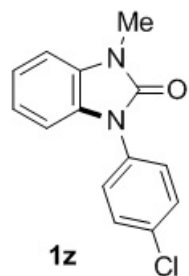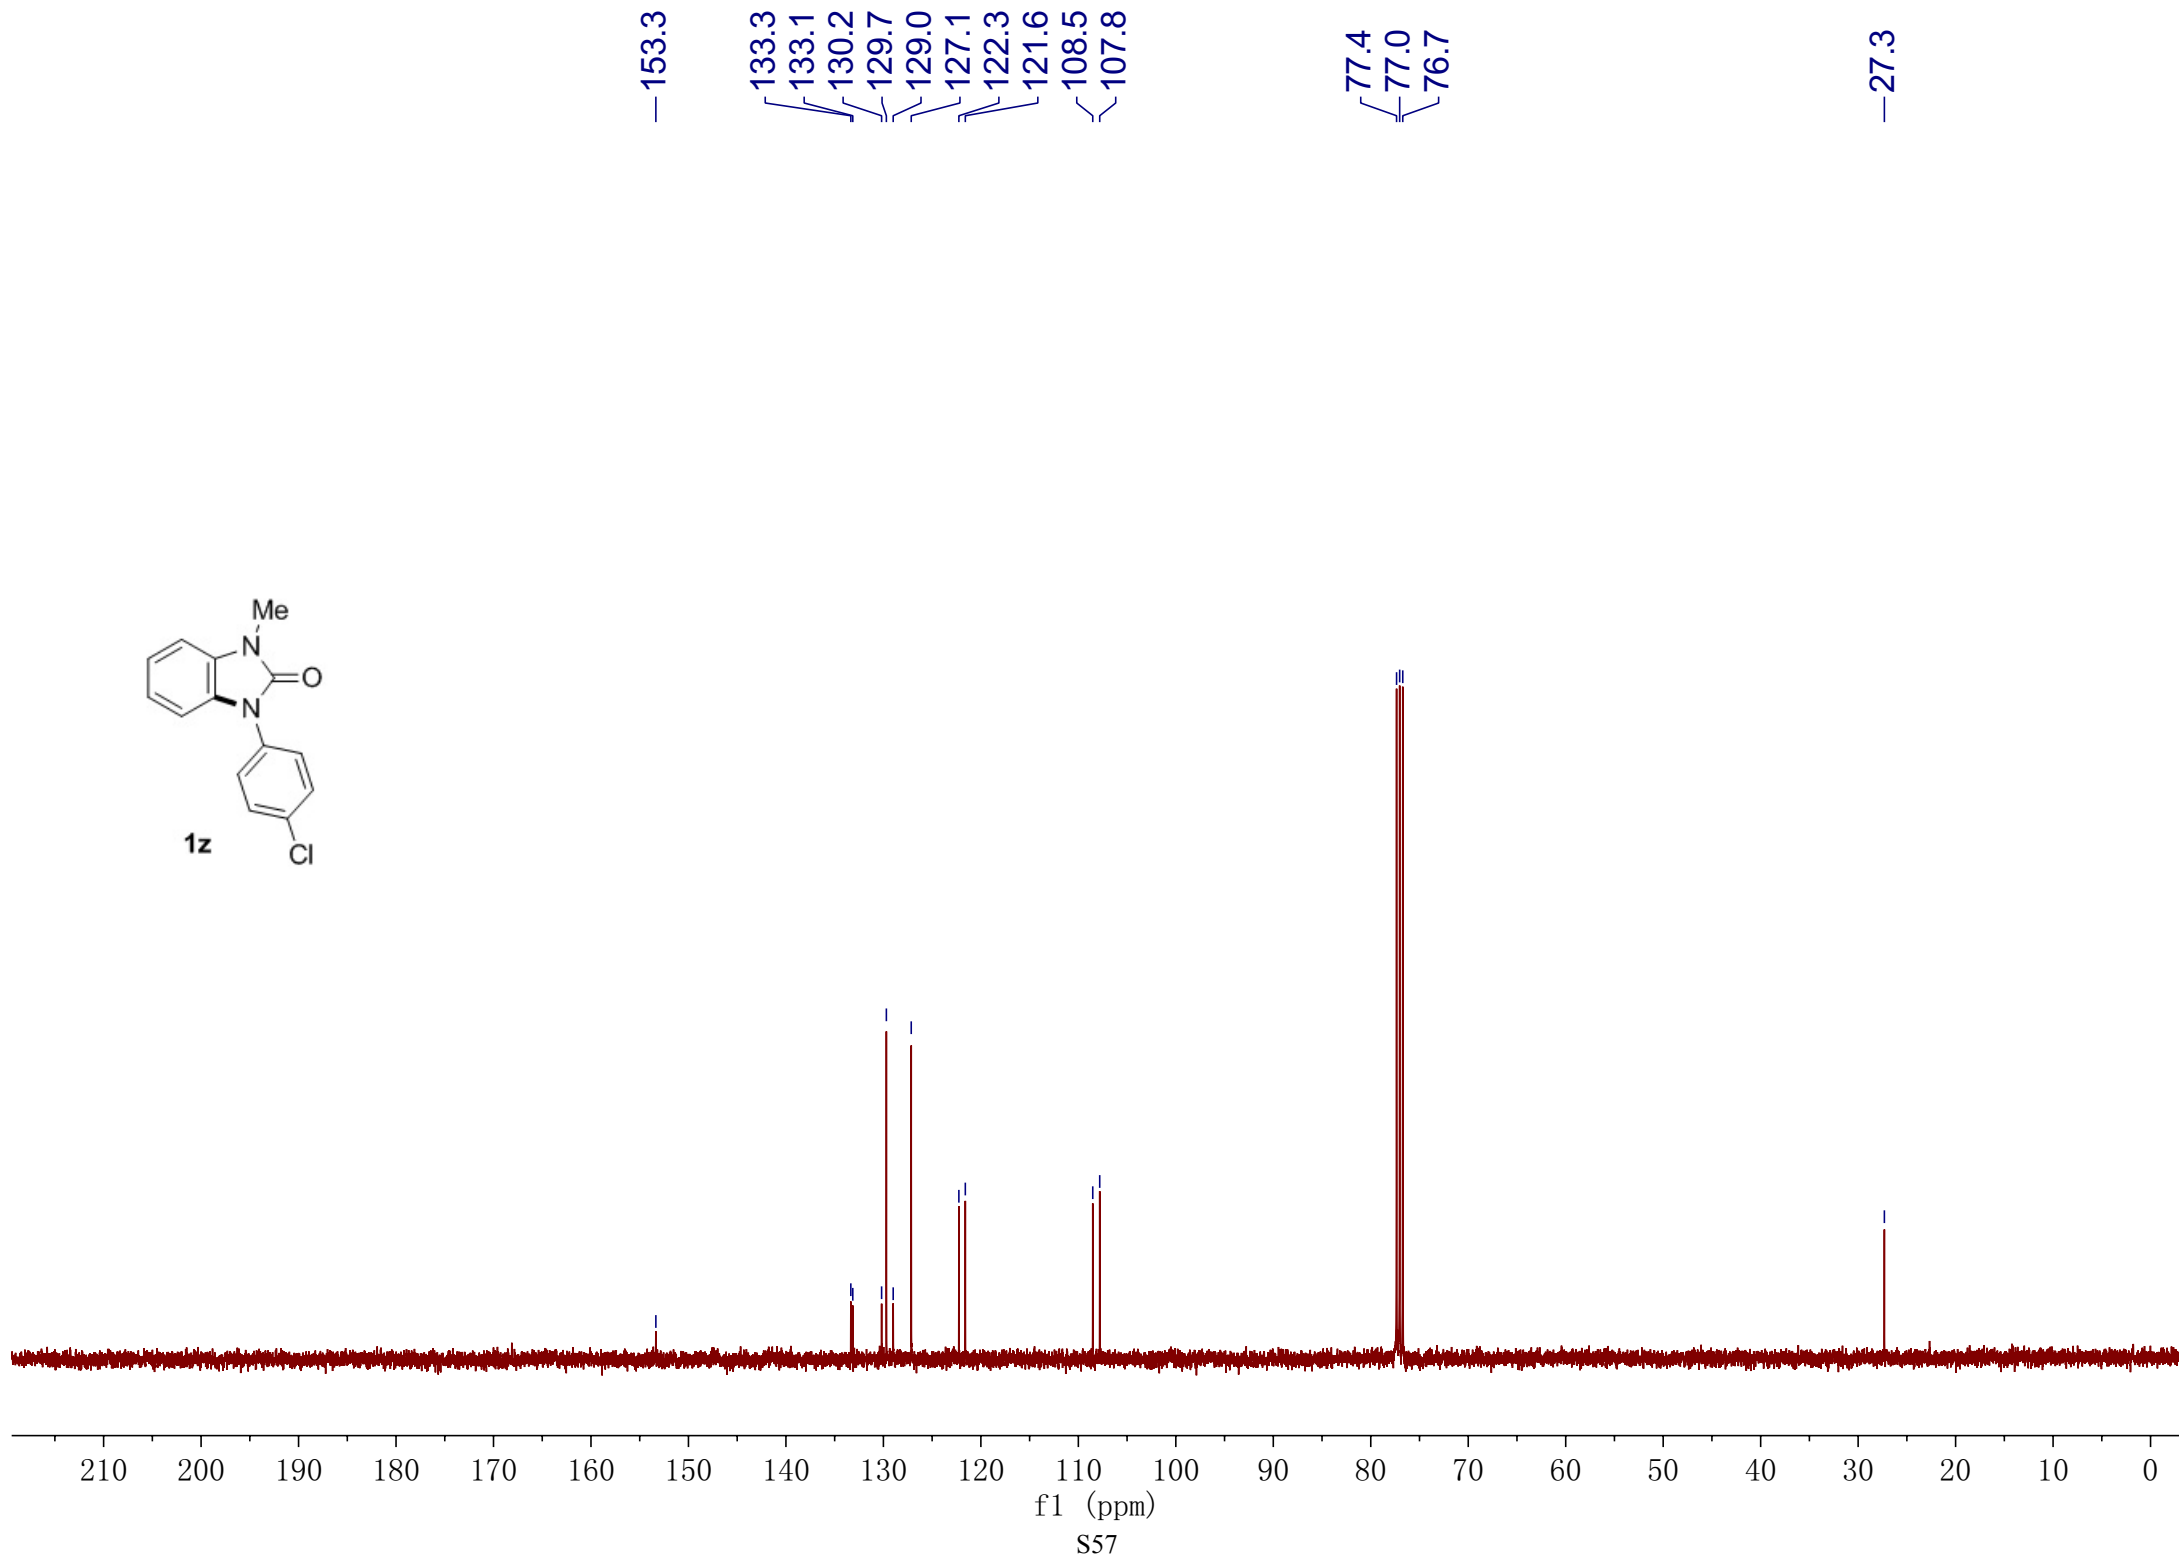

7.657  
7.650  
7.645  
7.633  
7.628  
7.621  
7.448  
7.442  
7.436  
7.425  
7.420  
7.413  
7.255  
7.186  
7.179  
7.170  
7.166  
7.164  
7.160  
7.151  
7.144  
7.131  
7.100  
7.098  
7.080  
7.078  
7.069  
7.064  
7.063  
7.051  
7.032

3.479

0.000

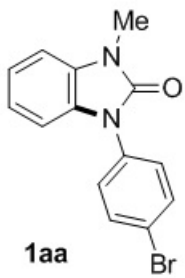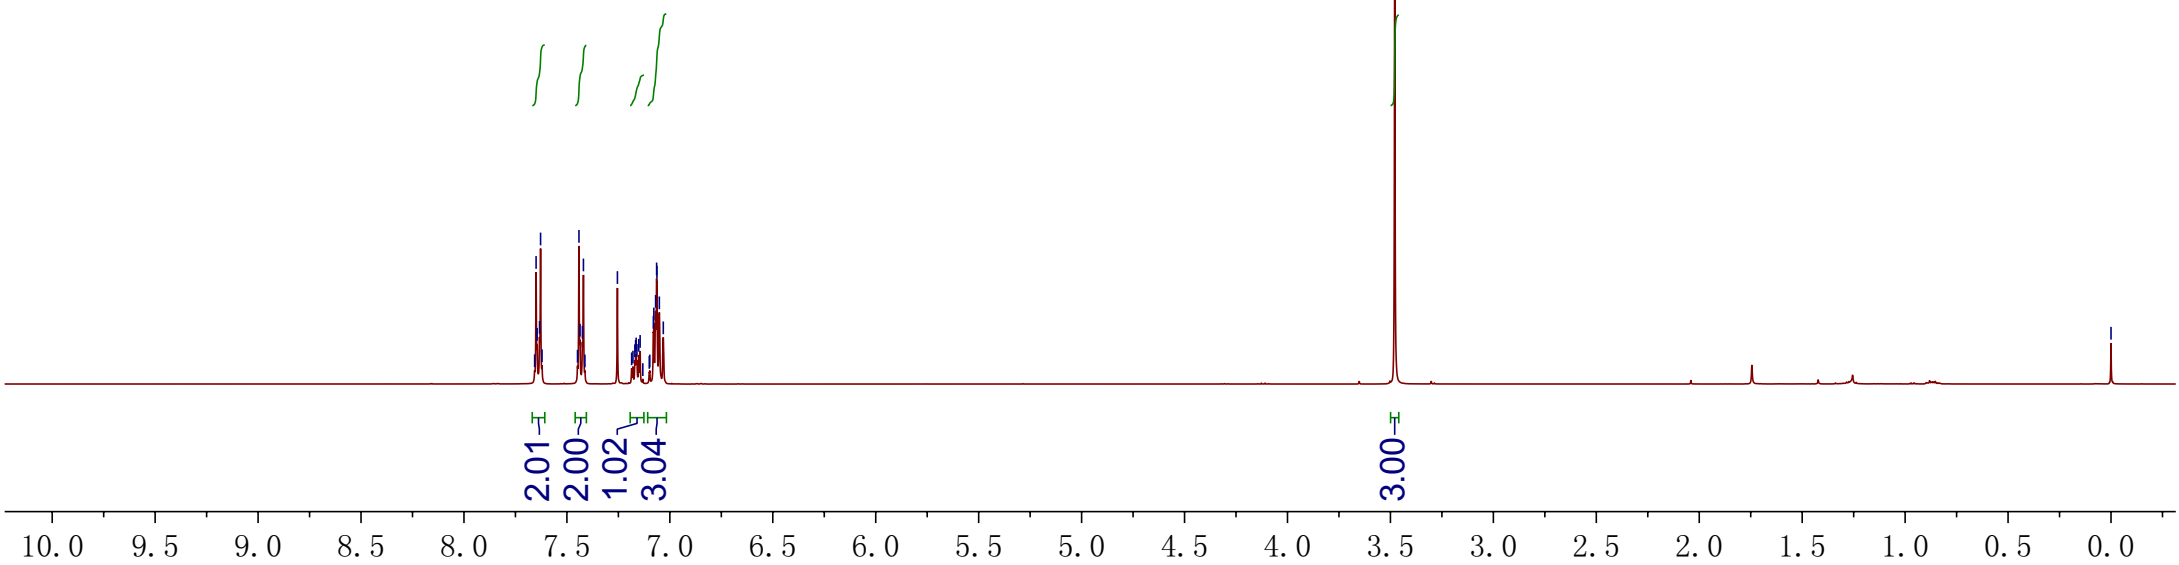

2.01  
2.00  
1.02  
3.04

3.00

f1 (ppm)

S58

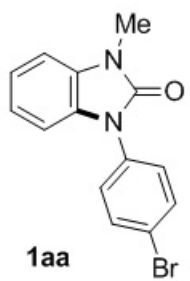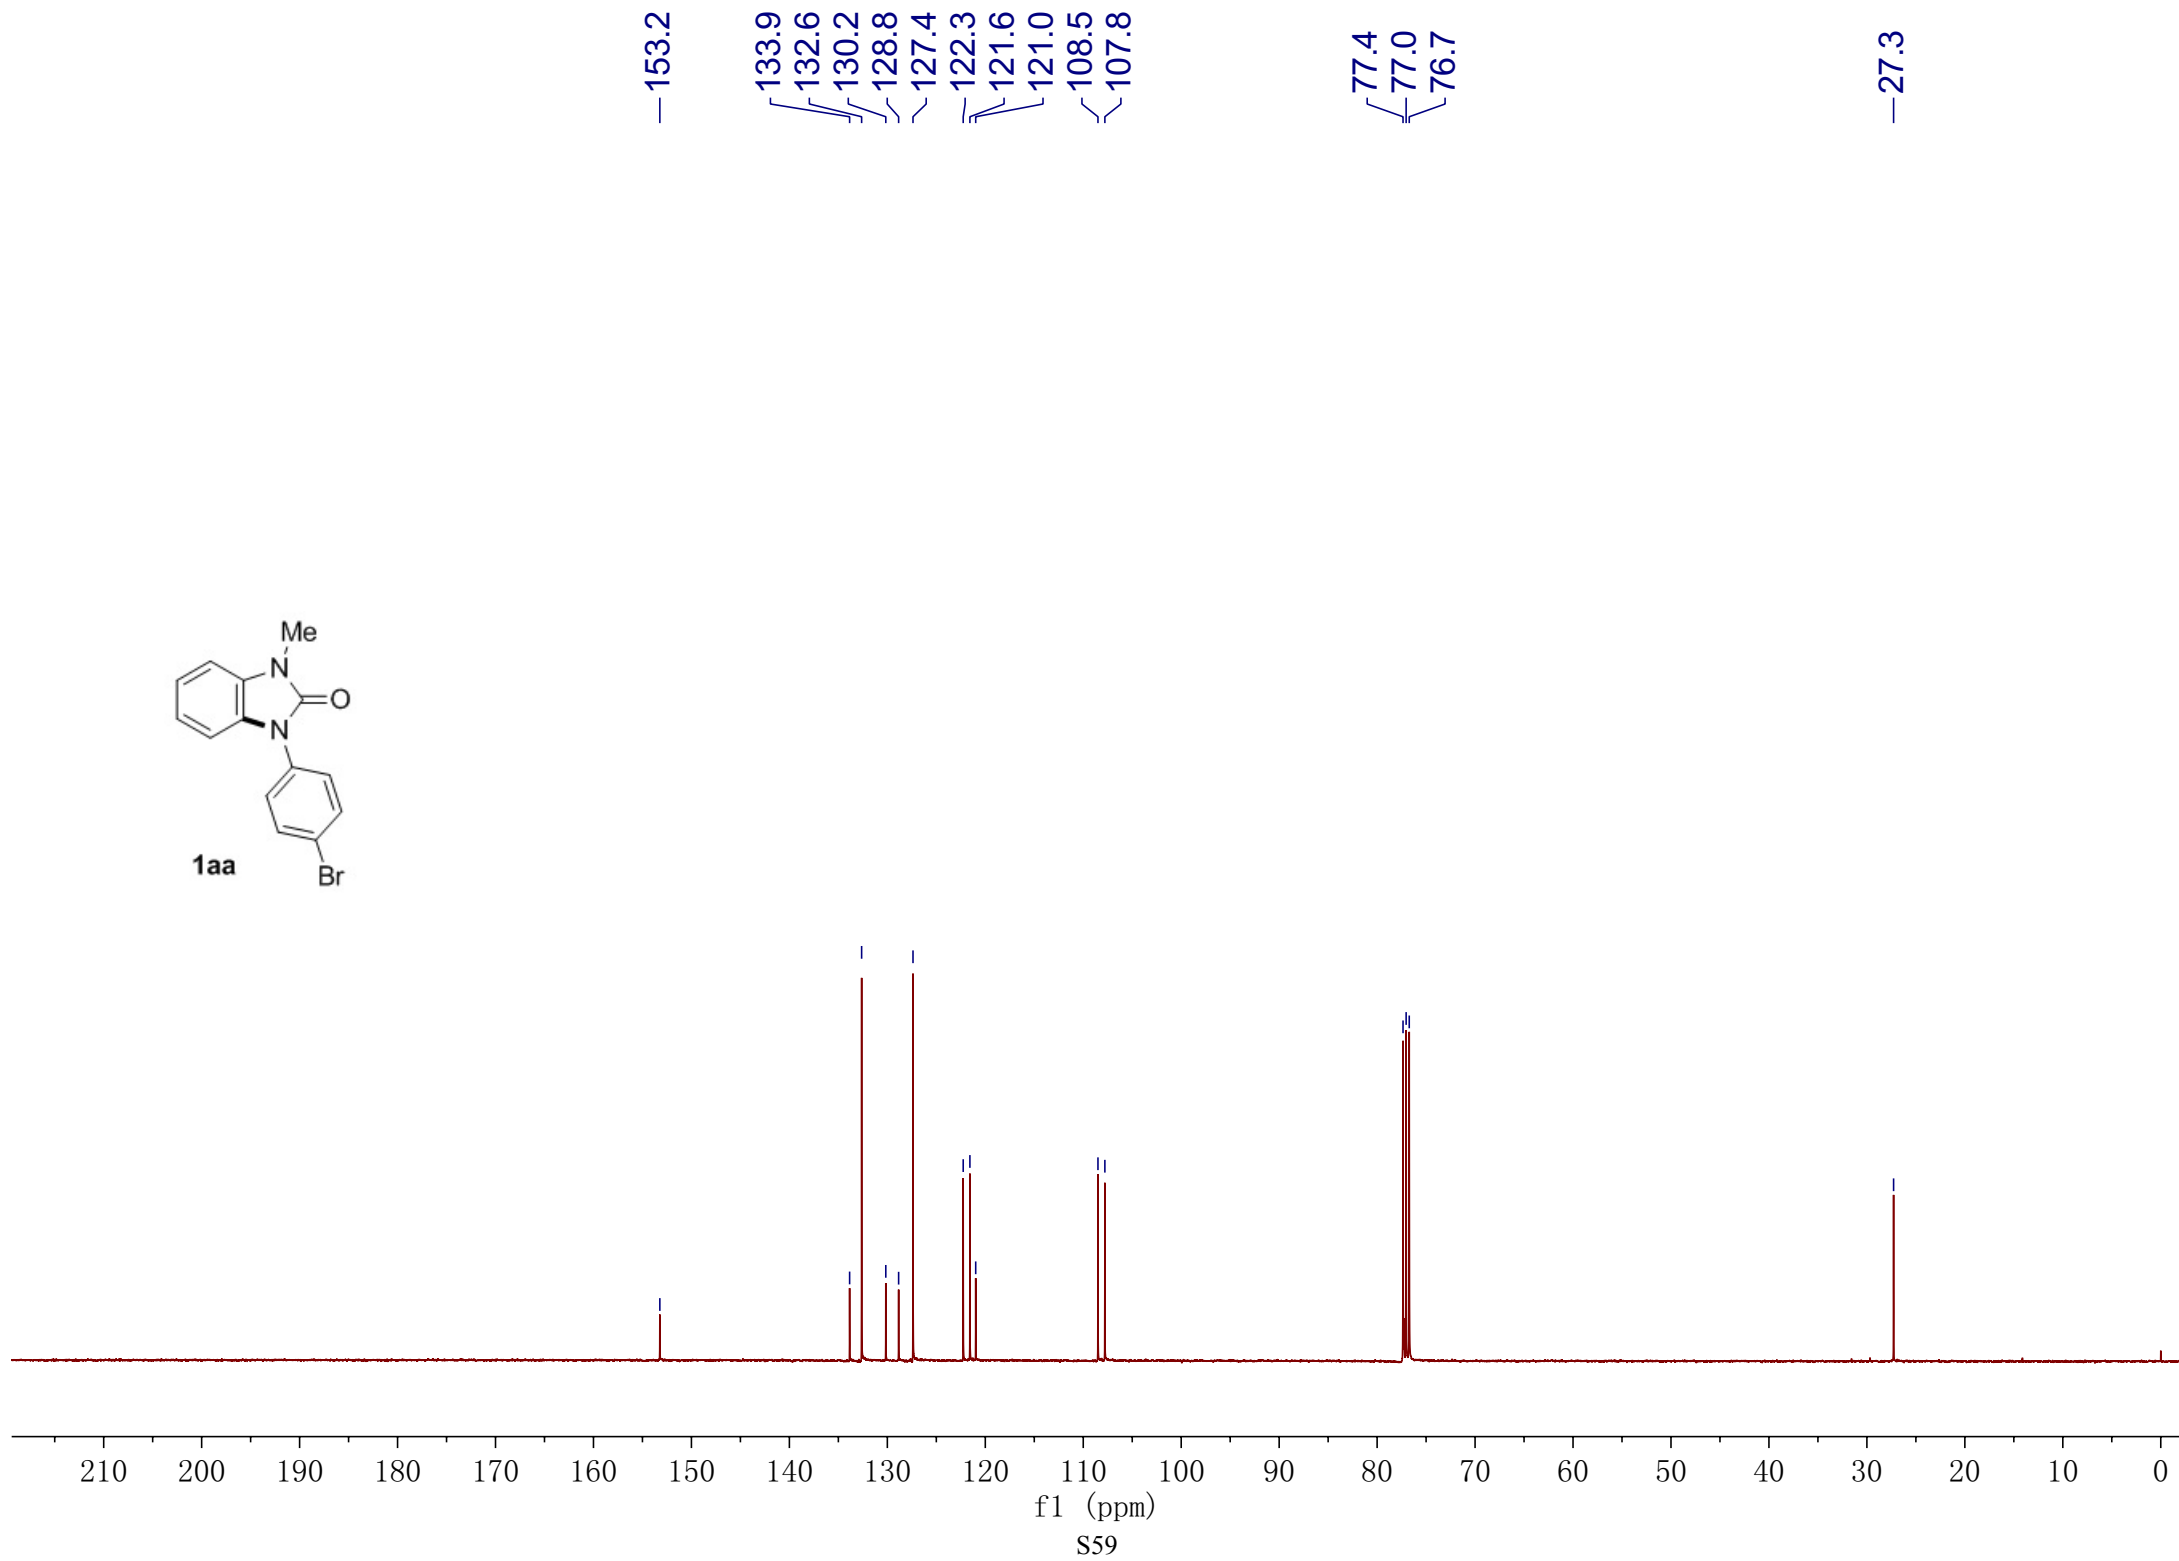

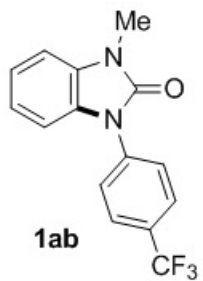

7.803  
7.782  
7.729  
7.708  
7.256  
7.216  
7.213  
7.197  
7.194  
7.179  
7.175  
7.154  
7.137  
7.121  
7.118  
7.100  
7.078  
7.058

3.499

0.000

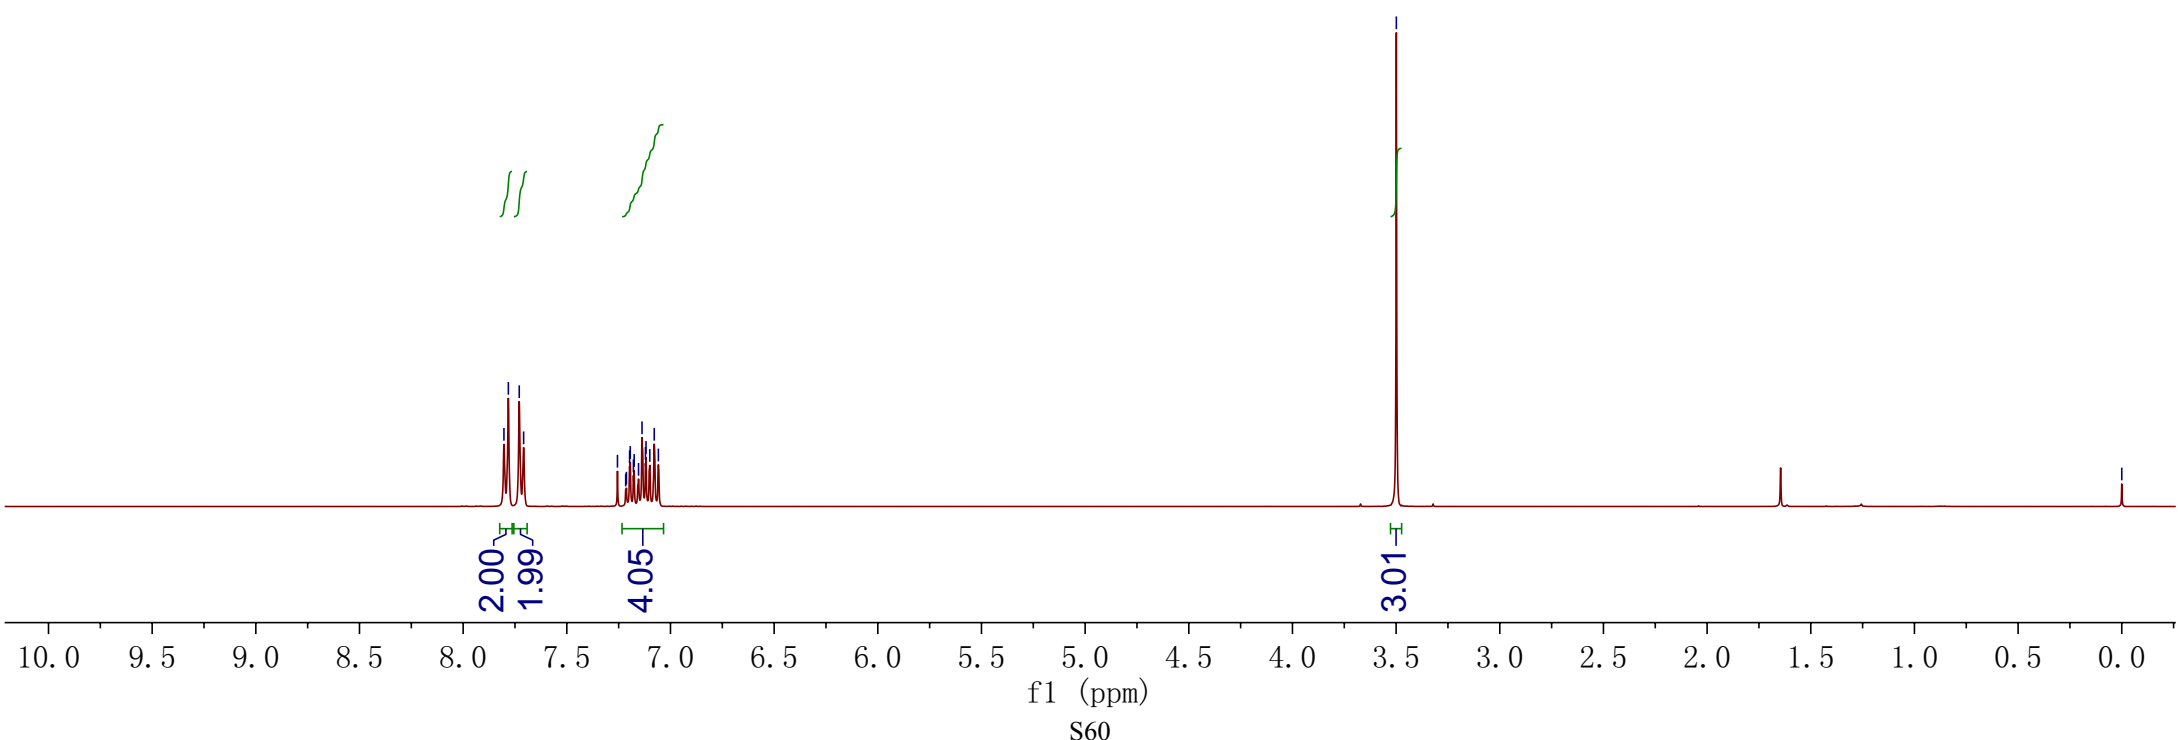



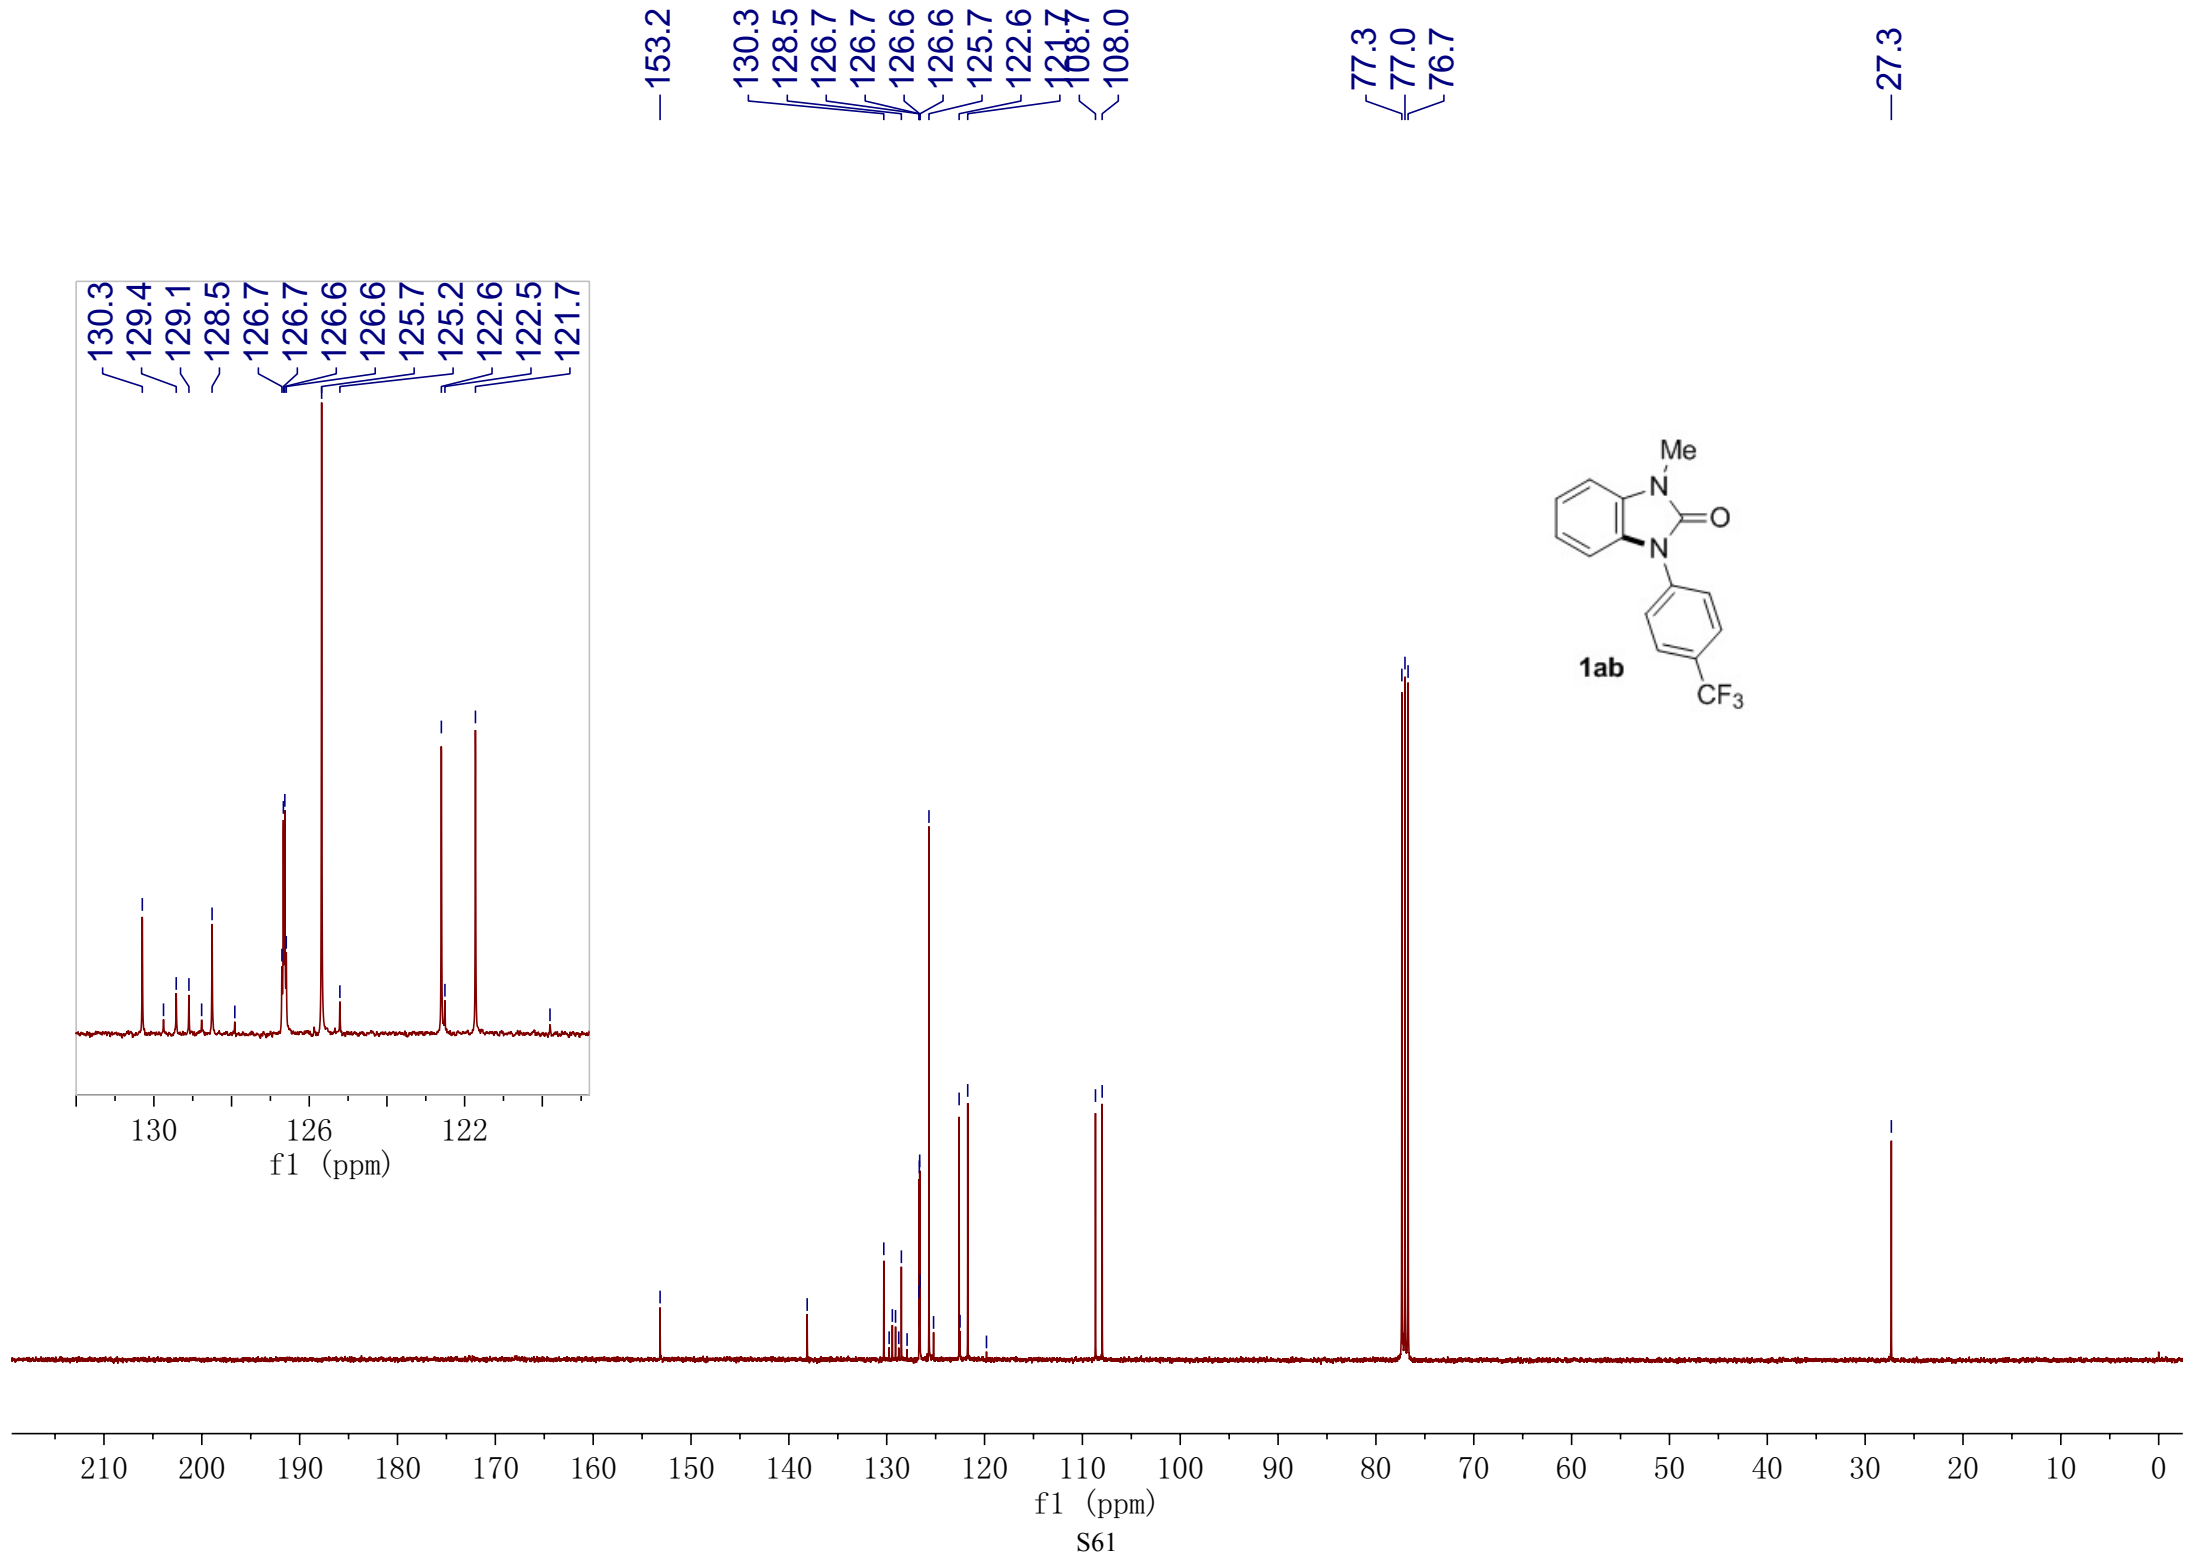

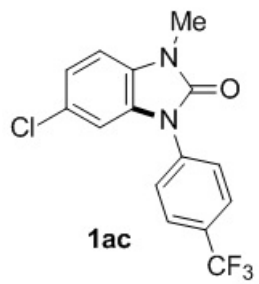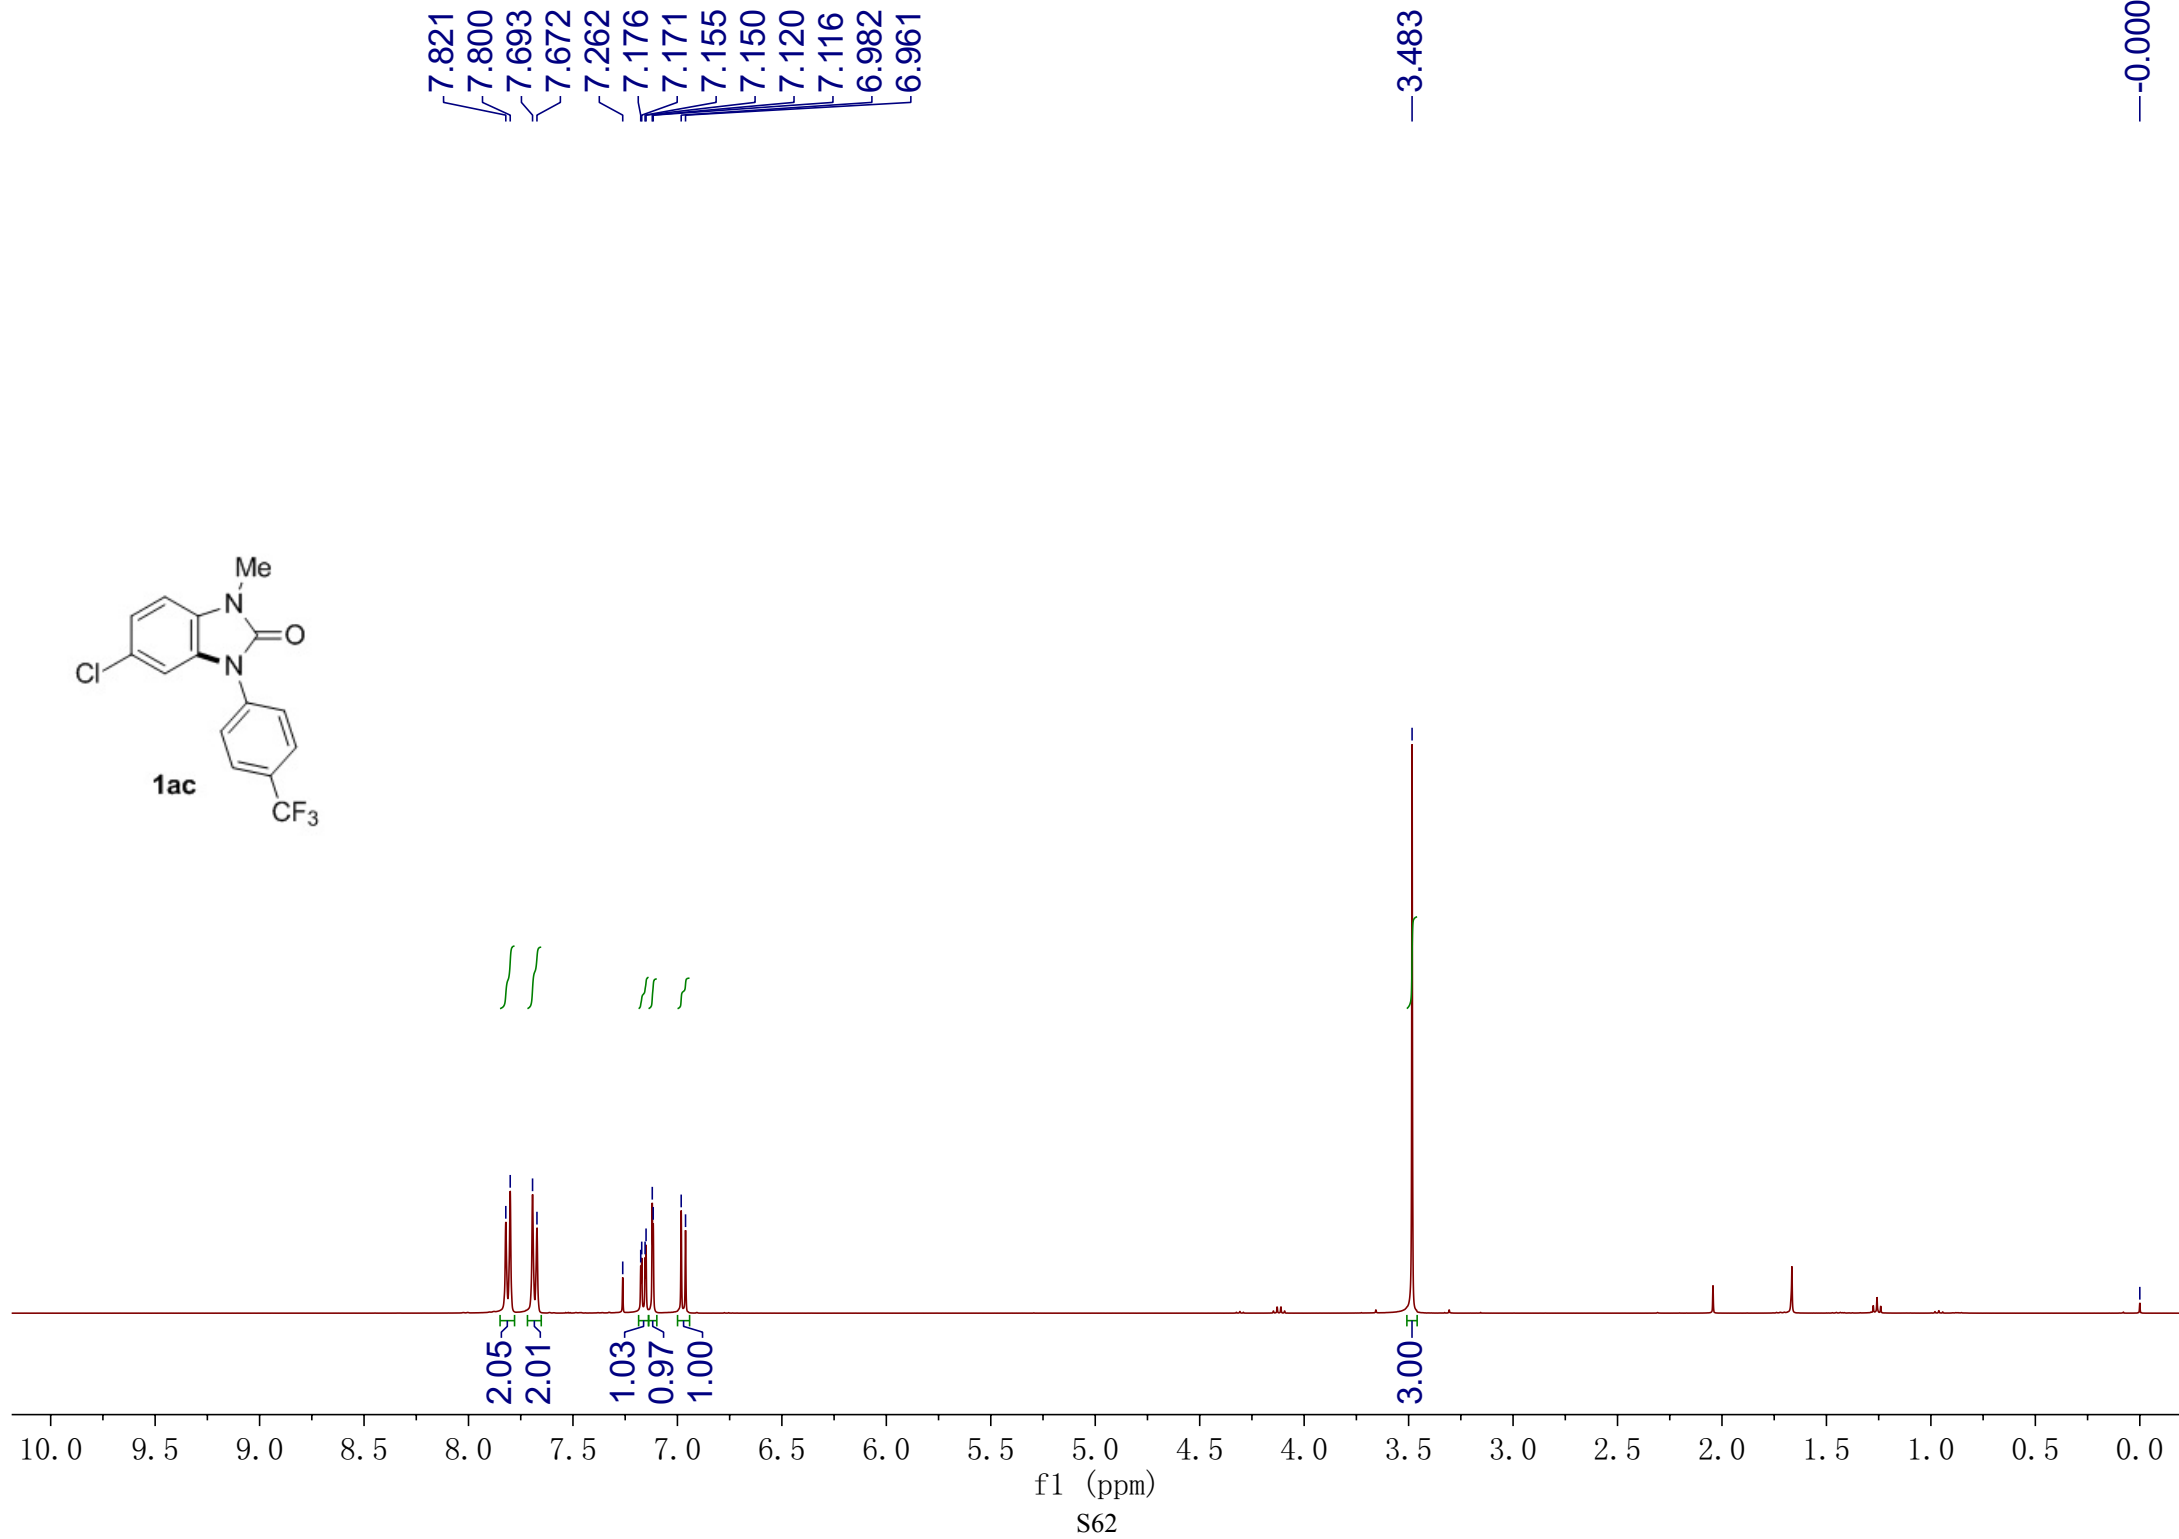

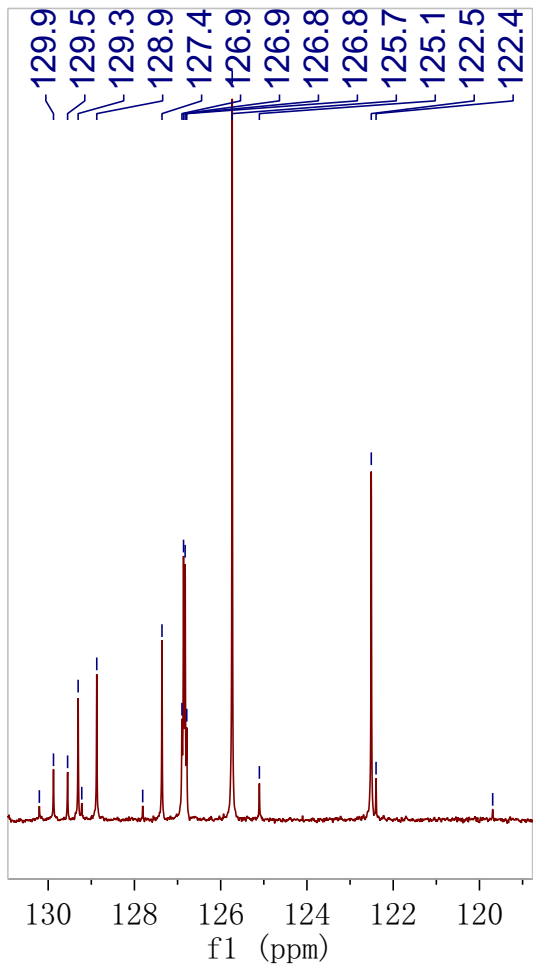

153.1  
129.3  
128.9  
127.4  
126.9  
126.9  
126.8  
126.8  
125.7  
122.5  
108.7

77.4  
77.0  
76.7

27.5

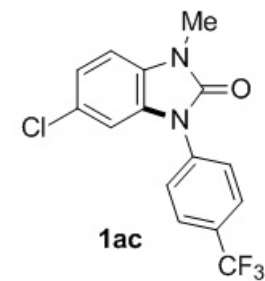

210 200 190 180 170 160 150 140 130 120 110 100 90 80 70 60 50 40 30 20 10 0

f1 (ppm)

S63

7.578  
7.575  
7.572  
7.569  
7.568  
7.463  
7.460  
7.455  
7.449  
7.447  
7.380  
7.375  
7.372  
7.366  
7.363  
7.358  
7.352  
7.256  
7.192  
7.185  
7.177  
7.172  
7.170  
7.166  
7.157  
7.151  
7.110  
7.098  
7.097  
7.091  
7.083  
7.080  
7.055  
7.036

3.486

0.000

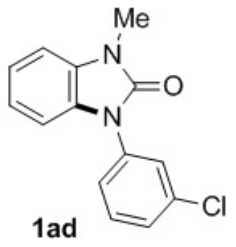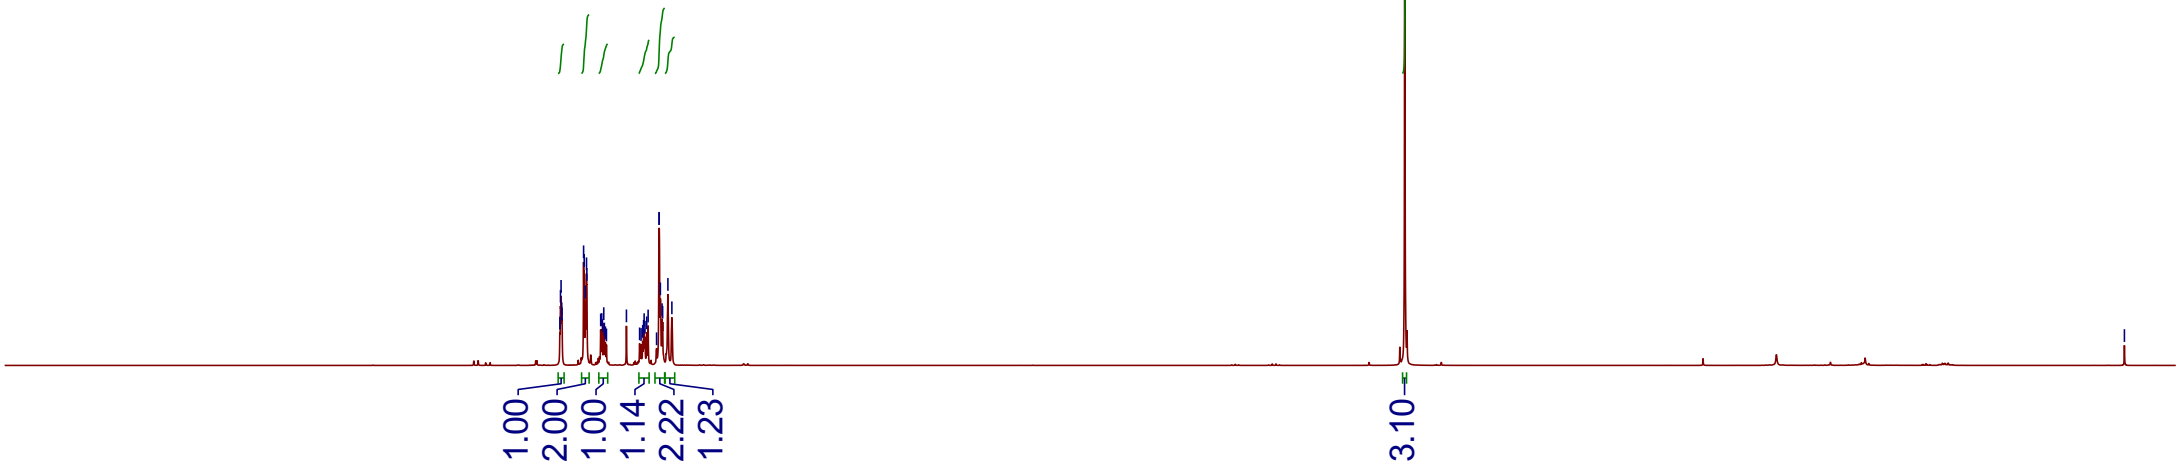

f1 (ppm)

S64

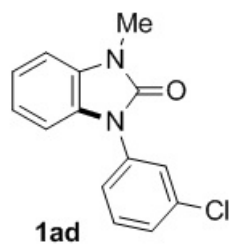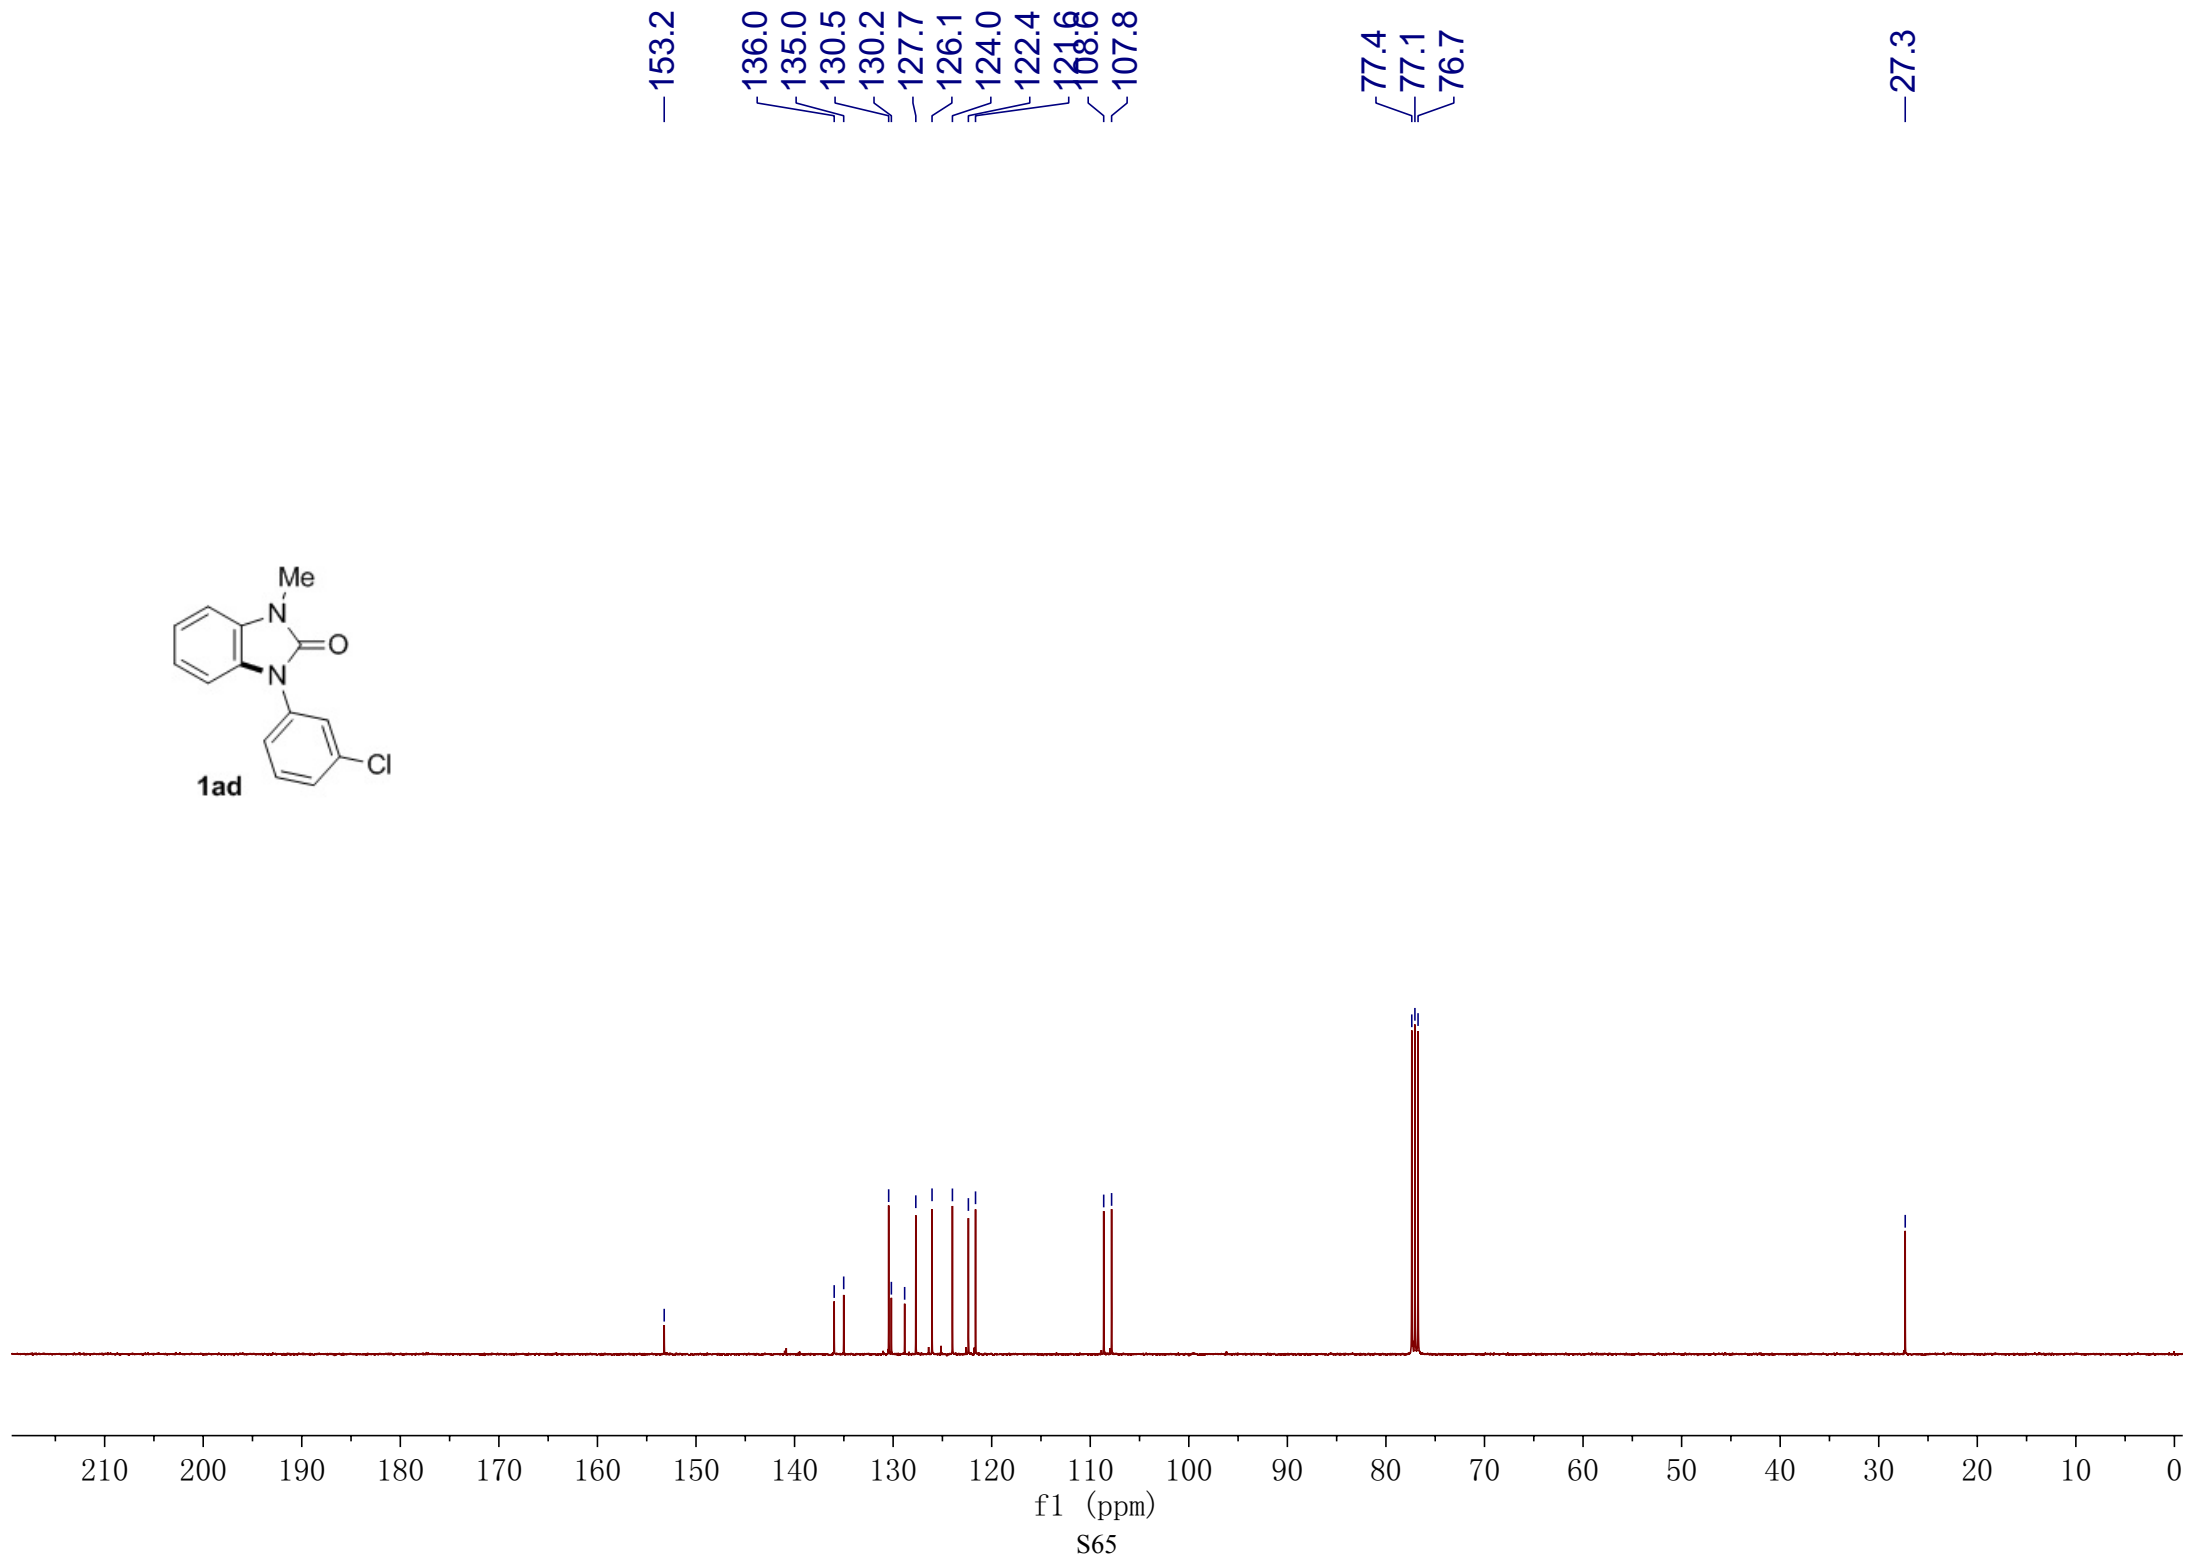

7.545  
7.543  
7.532  
7.524  
7.518  
7.502  
7.496  
7.410  
7.403  
7.395  
7.389  
7.382  
7.375  
7.367  
7.252  
7.173  
7.167  
7.157  
7.154  
7.151  
7.148  
7.138  
7.132  
7.091  
7.077  
7.074  
7.061  
7.058  
7.050  
7.041  
7.039  
7.031

—3.491

—0.000

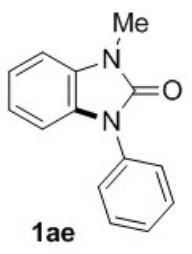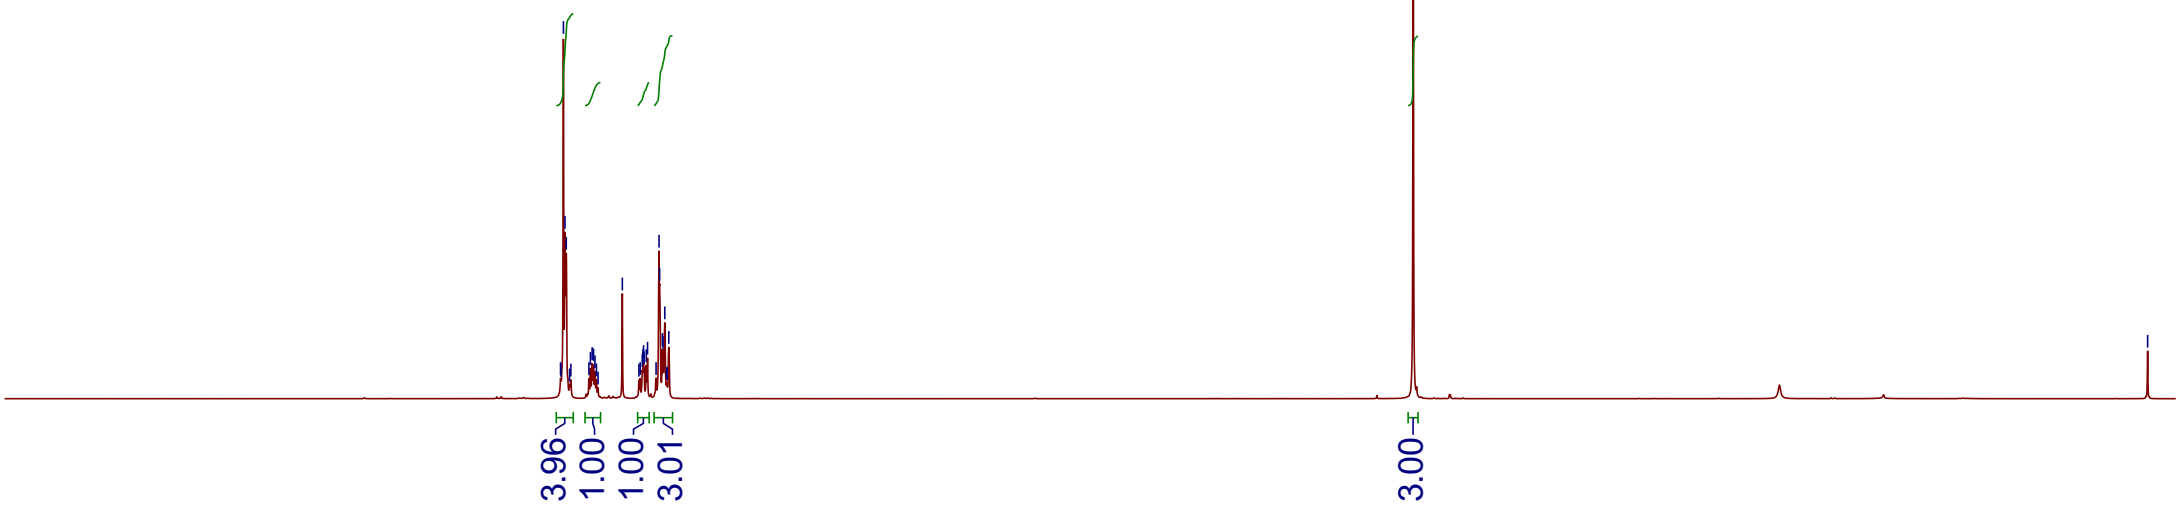

f1 (ppm)

S66

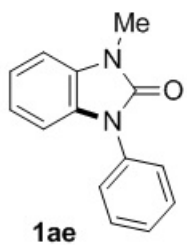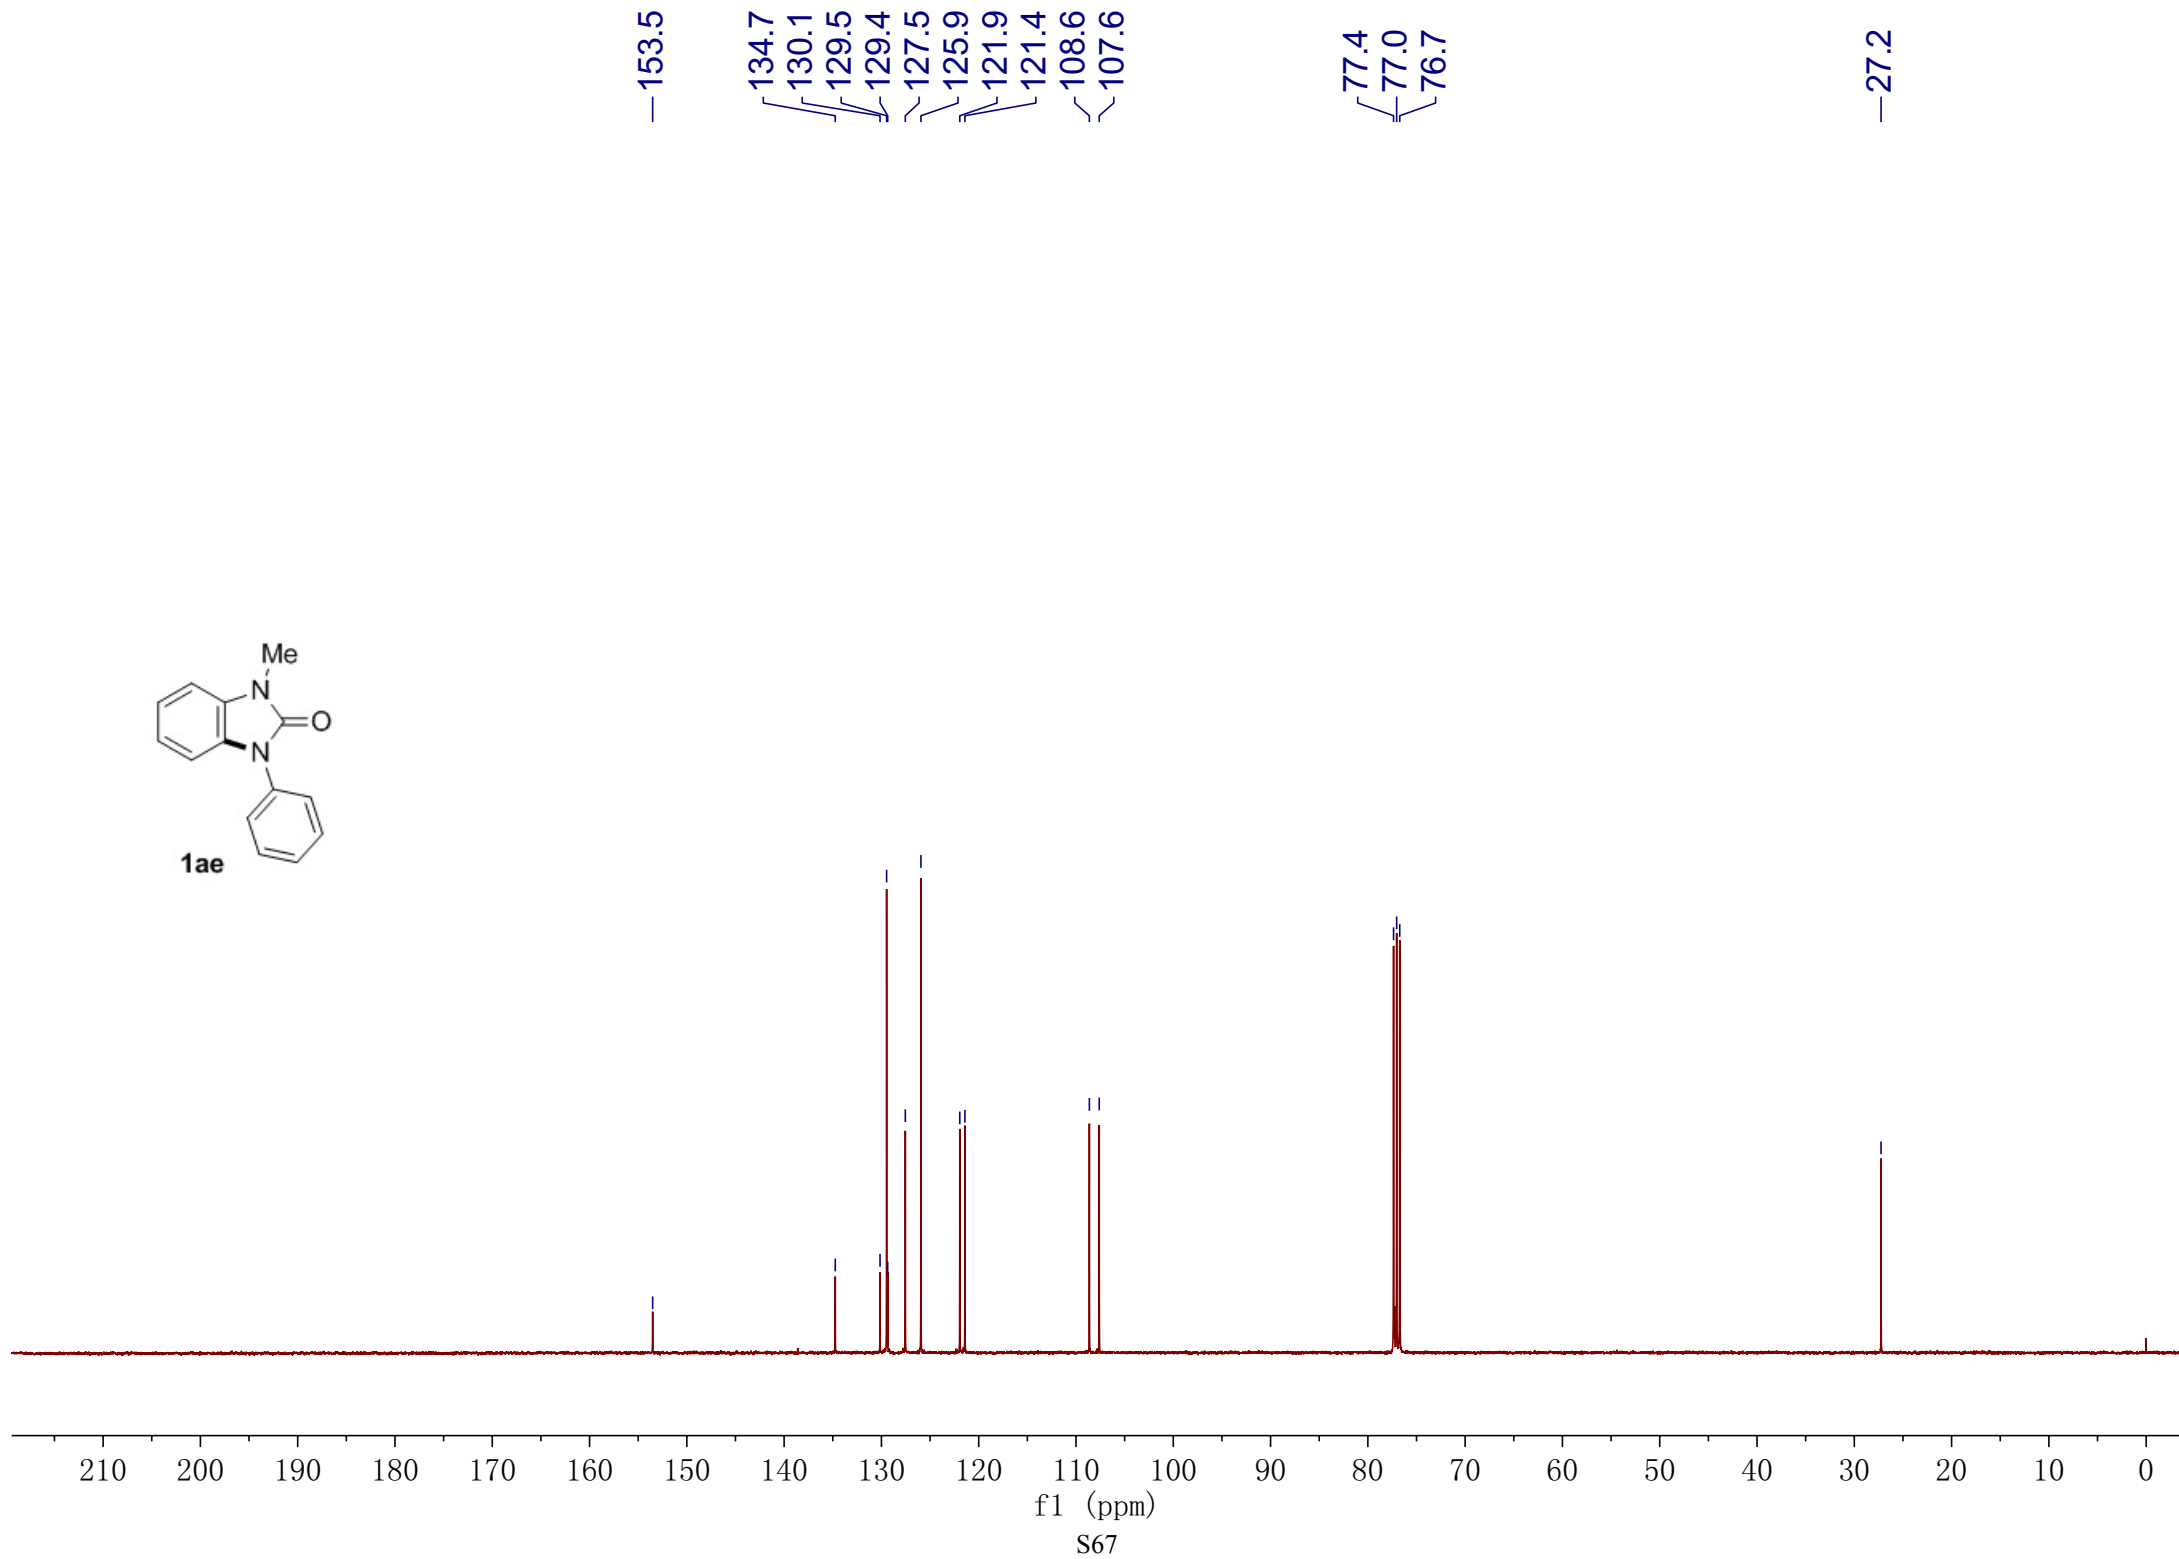

Supplement: c8nj03166e1.pdf [file c8nj03166e1.pdf]
